# Supplementary material for: Improved Statistical Methods Enable Greater Sensitivity in Rhythm Detection for Genome-Wide Data
Source: PLoS Comput Biol. 2015 Mar 20;11(3):e1004094. doi: 10.1371/journal.pcbi.1004094 (PMC4368642; doi:10.1371/journal.pcbi.1004094)
Supplement: S3 Data — The method results provided are all for the metadataset after pre-processing: JTK_BH_aby4, JTK_BH_a12 (these two come with DAVID results), eJTK_a04-12-20, and eJTK_a08-16. (XLSX) [file pcbi.1004094.s023.xlsx]

## Sheet: per24_phby4_a4-12-20_empP_len29
ID	Waveform	Period	Phase	Width	Mean	Std_Dev	Max	Min	Max_Amp	FC	IQR_FC	Tau	P	empP	BH1
Ubpy	trough	24	12	12	1.75439e-08	1	1.77468	-1.53229	3.30697	-1.15819	-1.104	0.703982	1.33494e-18	5e-07	9.12941e-05
vri	trough	24	12	12	-3.70074e-17	1	1.77783	-1.53953	3.31736	-1.15479	-1.1212	0.697577	3.32758e-18	5e-07	9.12941e-05
CG30494	trough	24	16	20	-3.50877e-08	1	1.89145	-2.08466	3.97611	-0.90732	-1.11484	0.69547	4.76736e-18	5e-07	9.12941e-05
tim	trough	24	16	12	4.52854e-17	1	1.41564	-1.77127	3.18691	-0.799225	-0.897361	0.655729	9.9451e-16	5e-07	9.12941e-05
Slob	trough	24	16	12	8.77193e-08	1	1.74434	-2.04838	3.79272	-0.851573	-1.42471	0.639063	7.12735e-15	5e-07	9.12941e-05
CG10513	trough	24	20	20	5.26316e-08	1	1.81507	-2.44529	4.26036	-0.742275	-1.41128	0.638213	8.25724e-15	5e-07	9.12941e-05
Cyp4d21	trough	24	16	12	1.75439e-08	1	2.03004	-1.9485	3.97855	-1.04185	-1.02505	0.613424	1.2107e-13	5e-07	9.12941e-05
ana	trough	24	16	12	7.01754e-08	1	3.34397	-2.08115	5.42512	-1.60679	-0.894569	0.60445	3.5331e-13	5e-07	9.12941e-05
CG10553	trough	24	20	12	-3.50877e-08	1	1.8381	-1.7823	3.6204	-1.03131	-1.30794	0.60233	4.02968e-13	5e-07	9.12941e-05
MESR3	trough	24	16	12	3.50877e-08	1	2.08981	-1.93749	4.0273	-1.07861	-1.06149	0.595476	8.776e-13	5e-07	9.12941e-05
Ugt35b	trough	24	0	12	5.84328e-18	1	1.87052	-1.99365	3.86417	-0.938241	-1.25357	0.584512	2.72745e-12	5e-07	9.12941e-05
CG11796	trough	24	4	12	1.75439e-08	1	1.74223	-2.08749	3.82972	-0.834605	-0.958423	0.560227	2.63691e-11	5e-07	9.12941e-05
rgr	trough	24	16	12	0.0173893	0.999695	1.85168	-2.56876	4.42044	-0.720846	-1.10108	0.553171	5.22103e-11	5e-07	9.12941e-05
puc	trough	24	12	12	-1.75439e-08	1	1.89762	-2.85916	4.75678	-0.6637	-1.355	0.550246	6.53373e-11	5e-07	9.12941e-05
cry	trough	24	4	12	1.36343e-17	1	1.4523	-2.06116	3.51346	-0.704605	-1.47274	0.547378	8.16272e-11	5e-07	9.12941e-05
Cpr72Ec	trough	24	4	12	7.01754e-08	1	1.94603	-1.76182	3.70784	-1.10456	-1.13518	0.540953	1.41373e-10	5e-07	9.12941e-05
Cyp313a1	trough	24	20	4	-7.79104e-18	1	2.26413	-3.23755	5.50168	-0.699335	-1.19238	0.538716	1.75605e-10	5e-07	9.12941e-05
Gclm	trough	24	16	4	-3.50877e-08	1	2.0951	-2.5857	4.6808	-0.810267	-1.21314	0.536505	2.17772e-10	5e-07	9.12941e-05
CG10237	trough	24	16	12	3.50877e-08	1	1.85181	-2.0937	3.94551	-0.884468	-1.13691	0.536505	2.17772e-10	5e-07	9.12941e-05
CG8419	trough	24	16	20	-1.75439e-08	1	1.7136	-2.03517	3.74877	-0.841995	-1.09675	0.536505	2.17772e-10	5e-07	9.12941e-05
CG17386	trough	24	20	12	0.0150996	0.993583	1.5794	-2.75132	4.33072	-0.574051	-1.29722	0.531844	3.33315e-10	5e-07	9.12941e-05
per	trough	24	12	12	-0.00748479	1.01135	1.76299	-2.47698	4.23997	-0.711749	-1.24595	0.525905	5.06955e-10	5e-07	9.12941e-05
GstD1	trough	24	4	12	5.26316e-08	1	1.94979	-3.07419	5.02398	-0.634247	-0.885051	0.526819	5.06955e-10	5e-07	9.12941e-05
trpl	trough	24	8	12	1.75439e-08	1	1.74214	-2.13414	3.87628	-0.816323	-1.18287	0.524499	5.6244e-10	5e-07	9.12941e-05
inaD	trough	24	0	12	1.75439e-08	1	1.61882	-2.3685	3.98732	-0.68348	-1.47214	0.512414	1.55613e-09	5e-07	9.12941e-05
Cct2	trough	24	4	12	-3.50877e-08	1	2.00032	-1.84139	3.84171	-1.08631	-1.25718	0.5114	1.71929e-09	5e-07	9.12941e-05
t	trough	24	0	12	0.0180736	0.987624	1.72357	-3.06303	4.7866	-0.562703	-1.03985	0.509839	1.89885e-09	5e-07	9.12941e-05
pinta	trough	24	4	4	-0.02312	0.98971	1.76302	-3.47254	5.23555	-0.507704	-0.893974	0.510115	1.89885e-09	5e-07	9.12941e-05
Pka-C3	trough	24	20	4	5.26316e-08	1	2.05566	-2.13167	4.18734	-0.964342	-1.04818	0.50925	2.09639e-09	5e-07	9.12941e-05
Chd64	trough	24	4	12	-1.75439e-08	1	1.64446	-1.94226	3.58672	-0.846673	-0.99507	0.50369	3.10328e-09	5e-07	9.12941e-05
Clk	trough	24	20	20	0.00216323	0.991321	1.8927	-2.51786	4.41056	-0.751708	-2.04647	0.502368	3.41992e-09	5e-07	9.12941e-05
Ndae1	trough	24	20	20	1.75439e-08	1	2.69309	-1.93627	4.62936	-1.39086	-1.05307	0.499805	4.14895e-09	5e-07	9.12941e-05
b	trough	24	20	12	-1.75439e-08	1	1.79486	-2.01706	3.81192	-0.889839	-1.40308	0.498524	4.56738e-09	5e-07	9.12941e-05
CG14275	trough	24	12	12	1.75439e-08	1	1.769	-2.36086	4.12986	-0.749304	-1.21138	0.49772	5.02623e-09	5e-07	9.12941e-05
CG15093	trough	24	4	12	5.26316e-08	1	1.75198	-2.76086	4.51283	-0.634577	-1.45096	0.494696	6.08041e-09	5e-07	9.12941e-05
inaC	trough	24	8	4	-1.75439e-08	1	1.87208	-2.01762	3.8897	-0.927866	-1.27359	0.492439	7.3454e-09	5e-07	9.12941e-05
CG6409	trough	24	16	12	-3.50877e-08	1	1.77085	-2.00143	3.77228	-0.884789	-1.60072	0.490354	8.86122e-09	5e-07	9.12941e-05
CG1943	trough	24	16	12	-5.26316e-08	1	2.08759	-1.92538	4.01297	-1.08425	-0.848659	0.489072	9.72764e-09	5e-07	9.12941e-05
CG10641	trough	24	4	12	-1.75439e-08	1	1.79569	-2.27408	4.06977	-0.789635	-1.4633	0.486986	1.06751e-08	5e-07	9.12941e-05
Npc2b	trough	24	4	20	1.75439e-08	1	1.57091	-2.36944	3.94035	-0.662987	-1.19198	0.486986	1.06751e-08	5e-07	9.12941e-05
Pdp1	trough	24	12	12	1.75439e-08	1	2.26713	-1.89707	4.1642	-1.19507	-0.922364	0.484909	1.28427e-08	5e-07	9.12941e-05
CG13101	trough	24	20	20	0.000341662	0.983934	1.47469	-3.03654	4.51123	-0.48565	-1.71643	0.484427	1.28427e-08	5e-07	9.12941e-05
c11.1	trough	24	8	20	-1.75439e-08	1	2.38772	-1.77002	4.15774	-1.34898	-1.20717	0.483462	1.40791e-08	5e-07	9.12941e-05
CG7149	trough	24	16	20	3.50877e-08	1	2.29219	-2.05541	4.3476	-1.1152	-0.898819	0.483945	1.40791e-08	5e-07	9.12941e-05
CG4847	trough	24	4	12	1.75439e-08	1	1.908	-2.9557	4.8637	-0.645532	-1.44456	0.481847	1.54294e-08	5e-07	9.12941e-05
to	trough	24	0	12	0.000773951	0.982495	1.92303	-1.91387	3.8369	-1.00478	-1.11822	0.481514	1.69034e-08	5e-07	9.12941e-05
ATPCL	trough	24	4	20	1.75439e-08	1	1.98403	-1.84347	3.82749	-1.07625	-1.34622	0.480562	1.8512e-08	5e-07	9.12941e-05
Pdh	trough	24	4	12	-1.11996e-17	1	1.99407	-2.24164	4.2357	-0.889558	-1.14282	0.480562	1.8512e-08	5e-07	9.12941e-05
Idh	trough	24	20	20	-5.26316e-08	1	1.68077	-2.79578	4.47655	-0.601182	-1.79934	0.479301	2.0267e-08	5e-07	9.12941e-05
CG17544	trough	24	16	12	-1.55821e-17	1	2.01775	-1.77918	3.79693	-1.13409	-1.16534	0.477535	2.21809e-08	5e-07	9.12941e-05
CG16978	trough	24	4	20	-8.77193e-08	1	1.86893	-1.78451	3.65344	-1.04731	-0.902537	0.475422	2.65415e-08	5e-07	9.12941e-05
Esyt2	trough	24	8	12	7.01754e-08	1	2.82481	-2.3881	5.21292	-1.18287	-1.06801	0.473203	2.9019e-08	1.05e-05	0.00137713
CG2277	trough	24	4	12	-3.50877e-08	1	1.5931	-3.21533	4.80843	-0.495469	-0.926793	0.474137	2.9019e-08	1.05e-05	0.00137713
Xrp1	trough	24	4	20	-3.50877e-08	1	1.85042	-1.97735	3.82777	-0.935809	-0.789603	0.472852	3.17174e-08	1.05e-05	0.00137713
CG9009	trough	24	16	20	5.26316e-08	1	2.60036	-1.87179	4.47215	-1.38923	-0.81736	0.468561	4.13323e-08	1.05e-05	0.00137713
Obp99a	trough	24	16	12	5.26316e-08	1	2.08806	-2.32964	4.4177	-0.896303	-1.32856	0.458305	8.25606e-08	1.05e-05	0.00137713
Pkc53E	trough	24	16	20	2.33731e-17	1	1.74348	-1.92468	3.66816	-0.905854	-1.06073	0.458305	8.25606e-08	1.05e-05	0.00137713
Dip-B	trough	24	0	12	-1.75439e-08	1	1.6043	-3.08755	4.69186	-0.519604	-1.38176	0.457052	8.98901e-08	1.05e-05	0.00137713
5-HT2	trough	24	12	12	1.75439e-08	1	2.59441	-2.33378	4.92819	-1.11168	-1.34683	0.455443	1.06458e-07	1.05e-05	0.00137713
Pk61C	trough	24	12	12	-3.50877e-08	1	2.25319	-1.41002	3.66321	-1.59798	-0.808997	0.454161	1.15801e-07	1.05e-05	0.00137713
CG6145	trough	24	16	12	-1.75439e-08	1	2.46421	-2.34455	4.80876	-1.05104	-1.16611	0.450613	1.36888e-07	1.05e-05	0.00137713
CG11686	trough	24	4	12	5.26316e-08	1	2.10765	-2.49372	4.60137	-0.845183	-1.1617	0.449724	1.48762e-07	1.05e-05	0.00137713
rtp	trough	24	4	12	3.50877e-08	1	1.88414	-1.79759	3.68173	-1.04815	-1.04018	0.444584	2.06855e-07	1.05e-05	0.00137713
CG12177	trough	24	0	4	0.0115193	0.976639	1.96009	-1.98369	3.94378	-0.988099	-1.11594	0.445465	2.06855e-07	1.05e-05	0.00137713
Vdup1	trough	24	20	20	-3.50877e-08	1	1.74871	-2.71498	4.46369	-0.644097	-1.48189	0.443417	2.24454e-07	1.05e-05	0.00137713
GV1	trough	24	4	12	3.50877e-08	1	2.26541	-2.49852	4.76394	-0.906699	-1.20682	0.442014	2.43477e-07	1.05e-05	0.00137713
UGP	trough	24	4	12	3.50877e-08	1	2.12787	-2.22016	4.34803	-0.958431	-0.989888	0.439444	2.86236e-07	1.05e-05	0.00137713
rdgC	trough	24	16	12	-0.00651278	0.992387	2.04731	-1.86584	3.91315	-1.09726	-0.792548	0.439076	3.10215e-07	1.05e-05	0.00137713
Cyp6a21	trough	24	0	12	-1.75439e-08	1	1.85394	-2.6281	4.48204	-0.70543	-0.98936	0.439028	3.10215e-07	1.05e-05	0.00137713
CG6126	trough	24	0	12	3.50877e-08	1	2.12826	-2.42712	4.55538	-0.876866	-0.87203	0.439028	3.10215e-07	1.05e-05	0.00137713
Cyp305a1	trough	24	4	12	-7.79104e-18	1	1.70923	-3.0813	4.79053	-0.554709	-1.31715	0.436874	3.36102e-07	1.05e-05	0.00137713
CG11210	trough	24	4	20	-1.75439e-08	1	1.53913	-2.23902	3.77815	-0.687411	-1.17921	0.435589	3.64041e-07	2.05e-05	0.00251179
Tal	trough	24	4	20	-2.33731e-17	1	2.13465	-1.84485	3.9795	-1.15708	-0.978733	0.43302	4.26698e-07	2.05e-05	0.00251179
Inos	trough	24	12	12	3.89552e-18	1	2.2003	-2.32865	4.52895	-0.944883	-1.01485	0.433663	4.26698e-07	2.05e-05	0.00251179
CG5455	trough	24	4	20	1.75439e-08	1	1.61407	-2.36916	3.98323	-0.681286	-0.90744	0.431735	4.61757e-07	2.05e-05	0.00251179
CG42508	trough	24	16	12	2.72686e-17	1	1.81543	-2.05878	3.87422	-0.881799	-1.30873	0.432666	4.61757e-07	2.05e-05	0.00251179
CG9705	trough	24	12	12	3.50877e-08	1	2.15712	-2.02939	4.1865	-1.06294	-0.851892	0.42982	5.40276e-07	3.05e-05	0.00299314
kraken	trough	24	12	12	-5.26316e-08	1	2.35055	-1.92887	4.27942	-1.21861	-0.970408	0.42982	5.40276e-07	3.05e-05	0.00299314
CG1136	trough	24	8	4	-1.75439e-08	1	1.87248	-2.39643	4.26891	-0.781362	-0.918471	0.429602	5.40276e-07	3.05e-05	0.00299314
CG3699	trough	24	4	20	0.0344343	0.989934	1.64074	-2.8239	4.46464	-0.58102	-1.69551	0.429165	5.84153e-07	3.05e-05	0.00299314
CG4019	trough	24	4	12	-1.75439e-08	1	2.5742	-2.53625	5.11045	-1.01496	-0.903548	0.429165	5.84153e-07	3.05e-05	0.00299314
Lsd-1	trough	24	12	4	-1.75439e-08	1	2.24174	-2.7809	5.02264	-0.806121	-1.37577	0.427258	6.31408e-07	3.05e-05	0.00299314
CG14153	trough	24	20	12	1.75439e-08	1	2.10228	-3.44178	5.54406	-0.610813	-1.31718	0.426757	6.31408e-07	3.05e-05	0.00299314
CG14661	trough	24	20	20	1.75439e-08	1	2.33202	-1.91318	4.2452	-1.21892	-1.25553	0.426757	6.31408e-07	3.05e-05	0.00299314
hgo	trough	24	4	12	0.00643326	0.992358	2.02354	-1.87257	3.89611	-1.08063	-1.01056	0.42531	7.37055e-07	3.05e-05	0.00299314
CG5945	trough	24	0	12	2.77556e-17	1	1.93776	-2.31595	4.25372	-0.836702	-1.19756	0.424866	7.37055e-07	3.05e-05	0.00299314
dlp	trough	24	12	12	5.26316e-08	1	1.62654	-2.26202	3.88857	-0.719067	-1.16358	0.423414	7.95988e-07	3.05e-05	0.00299314
Hmgs	trough	24	0	4	-5.26316e-08	1	2.60004	-1.97762	4.57766	-1.31473	-0.946679	0.423578	7.95988e-07	3.05e-05	0.00299314
CG9990	trough	24	16	20	-1.75439e-08	1	2.17253	-1.67301	3.84554	-1.29857	-1.01112	0.42241	8.59385e-07	3.05e-05	0.00299314
gol	trough	24	12	12	8.77193e-08	1	1.7321	-3.1154	4.8475	-0.55598	-1.4961	0.420852	9.27566e-07	4.05e-05	0.00299314
exba	trough	24	4	20	1.46082e-17	1	1.65785	-2.77056	4.42841	-0.598381	-1.31524	0.42017	1.00087e-06	4.05e-05	0.00299314
CG7300	trough	24	16	20	-3.50877e-08	1	1.65552	-2.40665	4.06218	-0.687894	-1.06218	0.418564	1.07966e-06	4.05e-05	0.00299314
CG10433	trough	24	20	20	3.50877e-08	1	1.83852	-2.52971	4.36824	-0.726772	-1.14038	0.419068	1.07966e-06	4.05e-05	0.00299314
CG1441	trough	24	0	4	-3.50877e-08	1	2.16765	-2.04811	4.21576	-1.05837	-1.03287	0.417141	1.16432e-06	4.05e-05	0.00299314
CG10799	trough	24	20	12	8.77193e-08	1	2.23958	-1.63788	3.87747	-1.36736	-1.19733	0.417786	1.16432e-06	4.05e-05	0.00299314
Buffy	trough	24	8	12	-0.0330199	0.989008	1.70437	-2.60993	4.31431	-0.653033	-1.0057	0.415495	1.25526e-06	4.05e-05	0.00299314
bbx	trough	24	16	20	3.50877e-08	1	1.80702	-2.40872	4.21574	-0.750201	-1.97937	0.414718	1.35292e-06	4.05e-05	0.00299314
sn	trough	24	16	20	3.50877e-08	1	2.64443	-1.80317	4.44761	-1.46654	-0.925411	0.414718	1.35292e-06	4.05e-05	0.00299314
rost	trough	24	20	20	-3.50877e-08	1	2.33847	-2.06443	4.4029	-1.13274	-1.05369	0.415223	1.35292e-06	4.05e-05	0.00299314
CG18598	trough	24	4	20	5.26316e-08	1	2.16482	-2.4976	4.66242	-0.86676	-1.04773	0.413746	1.45777e-06	4.05e-05	0.00299314
Rh6	trough	24	12	12	5.26316e-08	1	1.98292	-2.59862	4.58154	-0.763066	-1.0516	0.411884	1.57031e-06	4.05e-05	0.00299314
CG17646	trough	24	0	12	5.26316e-08	1	2.20577	-2.48701	4.69278	-0.886913	-1.13668	0.409416	1.82058e-06	4.05e-05	0.00299314
CG2846	trough	24	8	20	-7.01754e-08	1	2.20049	-2.20722	4.40771	-0.996954	-1.03897	0.410366	1.82058e-06	4.05e-05	0.00299314
Cyp18a1	trough	24	16	12	-1.75439e-08	1	2.15999	-1.93145	4.09144	-1.11833	-1.20768	0.40959	1.82058e-06	4.05e-05	0.00299314
CG8008	trough	24	20	12	5.26316e-08	1	1.91529	-2.10986	4.02515	-0.907783	-0.908478	0.410097	1.82058e-06	4.05e-05	0.00299314
Sesn	trough	24	12	12	1.75439e-08	1	2.87742	-2.31964	5.19706	-1.24046	-1.12363	0.40676	2.1084e-06	4.05e-05	0.00299314
CG7267	trough	24	8	4	1.75439e-08	1	2.13554	-2.37741	4.51295	-0.898266	-0.97677	0.407801	2.1084e-06	4.05e-05	0.00299314
CG7296	trough	24	20	4	3.50877e-08	1	2.71083	-2.35423	5.06506	-1.15147	-1.39157	0.40676	2.1084e-06	4.05e-05	0.00299314
CG8451	trough	24	20	12	-7.79104e-18	1	1.80394	-2.41312	4.21706	-0.747556	-1.36783	0.407534	2.1084e-06	4.05e-05	0.00299314
CG17352	trough	24	16	20	-3.50877e-08	1	2.17186	-2.5873	4.75916	-0.839432	-1.31694	0.404462	2.43901e-06	4.05e-05	0.00299314
CG3902	trough	24	4	12	-5.26316e-08	1	1.78351	-2.24481	4.02833	-0.794504	-0.927513	0.404751	2.43901e-06	4.05e-05	0.00299314
CG14290	trough	24	0	12	3.50877e-08	1	1.69274	-2.19238	3.88511	-0.772102	-1.10577	0.404266	2.43901e-06	4.05e-05	0.00299314
Nep4	trough	24	4	12	-3.50877e-08	1	2.12133	-2.79962	4.92096	-0.757722	-1.19063	0.403466	2.62219e-06	4.05e-05	0.00299314
Hydr2	trough	24	12	12	-1.75439e-08	1	2.04516	-1.76062	3.80578	-1.16162	-0.977826	0.402916	2.62219e-06	4.05e-05	0.00299314
Pgd	trough	24	4	20	3.50877e-08	1	2.10083	-2.24682	4.34765	-0.935022	-1.17581	0.403466	2.62219e-06	4.05e-05	0.00299314
CG4962	trough	24	4	20	0.0108609	0.959467	1.48349	-3.5299	5.01339	-0.420263	-1.52439	0.403466	2.62219e-06	4.05e-05	0.00299314
GstD3	trough	24	4	12	7.79104e-18	1	2.70505	-2.01189	4.71695	-1.34453	-0.950643	0.402181	2.81836e-06	4.05e-05	0.00299314
Ance-3	trough	24	4	20	3.50877e-08	1	2.15157	-2.47225	4.62382	-0.870288	-1.15388	0.402181	2.81836e-06	4.05e-05	0.00299314
Cyp6d5	trough	24	20	12	1.26604e-17	1	1.96016	-2.07195	4.03211	-0.946044	-0.903825	0.401126	3.02838e-06	4.05e-05	0.00299314
CG4101	trough	24	8	12	3.50877e-08	1	2.00423	-2.43905	4.44328	-0.821728	-0.921338	0.400107	3.25316e-06	4.05e-05	0.00299314
CG6834	trough	24	4	12	-0.016888	0.999214	1.7819	-2.43082	4.21272	-0.733044	-0.940032	0.399612	3.25316e-06	4.05e-05	0.00299314
CG6836	trough	24	0	12	-1.75439e-08	1	1.70434	-2.25682	3.96117	-0.755196	-1.41209	0.399116	3.49367e-06	4.05e-05	0.00299314
CG4991	trough	24	16	12	-1.75439e-08	1	1.79919	-2.58445	4.38364	-0.696161	-1.37354	0.398052	3.49367e-06	4.05e-05	0.00299314
CG6356	trough	24	4	12	-5.26316e-08	1	1.77426	-2.46832	4.24258	-0.718812	-1.31617	0.397042	3.75095e-06	4.05e-05	0.00299314
Cnx99A	trough	24	16	20	-5.26316e-08	1	1.86111	-2.16083	4.02194	-0.861297	-0.969703	0.39677	3.75095e-06	4.05e-05	0.00299314
CG6459	trough	24	20	4	7.01754e-08	1	2.09149	-1.81654	3.90803	-1.15136	-1.15488	0.397792	3.75095e-06	4.05e-05	0.00299314
GstE2	trough	24	8	4	-1.75439e-08	1	1.67468	-3.48682	5.1615	-0.480289	-1.10847	0.394977	4.32024e-06	5.05e-05	0.00367387
CG11866	trough	24	20	4	3.50877e-08	1	2.7283	-2.78603	5.51432	-0.979277	-0.972927	0.395229	4.32024e-06	5.05e-05	0.00367387
Timp	trough	24	20	4	1.75439e-08	1	2.20692	-2.58146	4.78838	-0.854912	-1.39569	0.393948	4.63464e-06	6.05e-05	0.00436725
tws	trough	24	4	20	3.50877e-08	1	1.85452	-2.19747	4.05199	-0.843936	-1.17873	0.391902	4.97059e-06	7.05e-05	0.00486293
CG17211	trough	24	8	12	9.25186e-18	1	1.69572	-2.51036	4.20609	-0.67549	-1.30281	0.392412	4.97059e-06	7.05e-05	0.00486293
CG10126	trough	24	12	12	-3.50877e-08	1	1.96542	-2.38137	4.34679	-0.825334	-1.02728	0.392667	4.97059e-06	7.05e-05	0.00486293
CG9377	trough	24	8	12	-0.0600618	0.992041	1.58834	-2.02839	3.61674	-0.783055	-0.944742	0.39113	5.32946e-06	7.05e-05	0.00486293
CG9444	trough	24	4	12	3.50877e-08	1	2.03637	-2.29618	4.33255	-0.886851	-1.54626	0.390617	5.32946e-06	7.05e-05	0.00486293
Cyp6a20	trough	24	16	20	5.26316e-08	1	2.01015	-4.22311	6.23327	-0.475988	-1.08344	0.390361	5.32946e-06	7.05e-05	0.00486293
CG9686	trough	24	4	12	7.01754e-08	1	2.49005	-2.20678	4.69683	-1.12837	-1.081	0.389332	5.71272e-06	8.05e-05	0.00539292
CG9427	trough	24	4	12	-8.77193e-08	1	1.92289	-2.3053	4.22818	-0.834116	-1.15395	0.389332	5.71272e-06	8.05e-05	0.00539292
msta	trough	24	0	12	5.26316e-08	1	2.39774	-1.70194	4.09968	-1.40883	-0.981943	0.390104	5.71272e-06	8.05e-05	0.00539292
CG5853	trough	24	16	12	-7.01754e-08	1	2.37198	-1.58261	3.95459	-1.49877	-1.03198	0.389079	6.12192e-06	8.05e-05	0.00539292
CG15717	trough	24	12	4	0.0118994	0.996795	1.98422	-3.07172	5.05594	-0.645965	-1.41816	0.387543	6.55869e-06	9.05e-05	0.00593476
GIIIspla2	trough	24	4	20	3.50877e-08	1	2.37907	-2.44168	4.82074	-0.974358	-1.22549	0.386762	6.55869e-06	9.05e-05	0.00593476
CG5447	trough	24	12	12	-2.19123e-17	1	2.06998	-2.51988	4.58986	-0.821462	-1.19601	0.387543	6.55869e-06	9.05e-05	0.00593476
Npc2a	trough	24	4	20	-1.75439e-08	1	2.26942	-2.14545	4.41487	-1.05778	-1.08545	0.382908	8.05227e-06	0.0001605	0.0102368
CG1124	trough	24	4	20	-3.50877e-08	1	2.08342	-2.08833	4.17175	-0.99765	-0.973818	0.382908	8.05227e-06	0.0001605	0.0102368
CG13305	trough	24	4	4	0.03515	1.0442	2.68819	-2.53234	5.22053	-1.06155	-0.878894	0.382908	8.05227e-06	0.0001605	0.0102368
betaTub56D	trough	24	12	12	8.77193e-08	1	1.89697	-2.86531	4.76228	-0.662047	-1.31231	0.382418	8.61768e-06	0.0001605	0.0102368
CG1600	trough	24	16	20	-1.75439e-08	1	2.52954	-1.89704	4.42657	-1.33342	-0.805698	0.381387	9.2204e-06	0.0001705	0.0107277
e	trough	24	0	12	-5.26316e-08	1	2.45654	-1.74959	4.20613	-1.40406	-0.906561	0.381092	9.2204e-06	0.0001705	0.0107277
Hdc	trough	24	0	12	7.79104e-18	1	2.06226	-2.3122	4.37446	-0.891901	-1.46492	0.379804	9.86269e-06	0.0002005	0.012447
JhI-26	trough	24	0	12	-0.0128918	0.995873	2.22548	-1.89727	4.12275	-1.17299	-0.860883	0.379804	9.86269e-06	0.0002005	0.012447
Trx-2	trough	24	4	12	-1.75439e-08	1	1.76907	-3.14975	4.91882	-0.561654	-1.15209	0.379053	1.0547e-05	0.0002105	0.0128959
CG10680	trough	24	4	12	3.50877e-08	1	2.00517	-2.51808	4.52325	-0.79631	-1.13678	0.379053	1.0547e-05	0.0002105	0.0128959
CG9027	trough	24	4	20	8.77193e-08	1	2.12221	-2.13791	4.26012	-0.992657	-1.14517	0.377768	1.12758e-05	0.0002205	0.0133331
Fmo-2	trough	24	20	20	-0.00636974	0.992335	1.98517	-2.81361	4.79878	-0.705557	-1.11708	0.376776	1.12758e-05	0.0002205	0.0133331
CG11594	trough	24	8	12	-1.75439e-08	1	2.1285	-1.94746	4.07596	-1.09296	-1.49386	0.375741	1.20519e-05	0.0002605	0.015353
CG9272	trough	24	0	20	-0.00577935	0.992132	1.80606	-3.48088	5.28694	-0.518852	-1.50649	0.375942	1.20519e-05	0.0002605	0.015353
CG8889	trough	24	4	12	-1.75439e-08	1	2.22309	-2.684	4.90709	-0.828274	-1.01672	0.376483	1.20519e-05	0.0002605	0.015353
alpha-Est7	trough	24	4	20	1.75439e-08	1	3.07406	-2.34376	5.41782	-1.31159	-0.915353	0.376483	1.20519e-05	0.0002605	0.015353
bnb	trough	24	20	4	-1.75439e-08	1	2.61502	-2.35463	4.96965	-1.11059	-1.48876	0.374731	1.28782e-05	0.0002705	0.0154533
CG9372	trough	24	4	12	-1.16866e-17	1	2.85065	-1.6541	4.50475	-1.72339	-1.07902	0.375198	1.28782e-05	0.0002705	0.0154533
CG13868	trough	24	20	4	-3.50877e-08	1	2.45995	-1.97406	4.43401	-1.24613	-0.833248	0.374731	1.28782e-05	0.0002705	0.0154533
GstE6	trough	24	4	12	1.94776e-17	1	1.63697	-2.4189	4.05587	-0.67674	-1.04909	0.375198	1.28782e-05	0.0002705	0.0154533
Pino	trough	24	16	12	3.50877e-08	1	3.59004	-2.08884	5.67888	-1.71868	-1.04083	0.374977	1.28782e-05	0.0002705	0.0154533
CG6084	trough	24	4	12	1.75439e-08	1	1.69319	-2.61612	4.30931	-0.647215	-1.04139	0.373913	1.37575e-05	0.0003005	0.0169591
Epac	trough	24	16	20	1.94776e-18	1	1.71548	-2.55103	4.26651	-0.672465	-1.16527	0.373695	1.37575e-05	0.0003005	0.0169591
CG34398	trough	24	8	12	0.0640156	1.03455	2.09125	-2.33102	4.42227	-0.89714	-1.3779	0.371894	1.4693e-05	0.0003105	0.0172106
Hr78	trough	24	4	20	1.55821e-17	1	2.2331	-1.87766	4.11076	-1.1893	-1.1688	0.372628	1.4693e-05	0.0003105	0.0172106
CG34165	trough	24	20	12	0.00663246	0.987796	1.97799	-3.04863	5.02663	-0.648813	-1.35425	0.37165	1.4693e-05	0.0003105	0.0172106
DnaJ-1	trough	24	12	4	2.33731e-17	1	1.57754	-2.46023	4.03777	-0.641215	-1.38626	0.370888	1.56882e-05	0.0003405	0.0186514
SPE	trough	24	20	4	3.50877e-08	1	2.02063	-2.70975	4.73038	-0.745689	-1.28288	0.370888	1.56882e-05	0.0003405	0.0186514
CG14053	trough	24	4	4	0.0701466	1.0211	2.23812	-3.6344	5.87252	-0.615815	-2.44223	0.370058	1.67466e-05	0.0003505	0.0188662
CG18302	trough	24	12	12	-9.7388e-18	1	1.67817	-2.63186	4.31002	-0.637636	-1.43403	0.369607	1.67466e-05	0.0003505	0.0188662
Rab-RP3	trough	24	20	4	-3.50877e-08	1	1.51061	-2.96618	4.47679	-0.509277	-1.57968	0.369607	1.67466e-05	0.0003505	0.0188662
CAH1	trough	24	0	12	1.75298e-17	1	3.12382	-1.84086	4.96468	-1.69694	-0.801847	0.368217	1.78718e-05	0.0003905	0.0204288
ple	trough	24	4	4	0.0105984	1.02132	1.69642	-2.53912	4.23555	-0.668115	-0.867283	0.368773	1.78718e-05	0.0003905	0.0204288
CG3940	trough	24	8	12	7.01754e-08	1	1.43231	-3.2938	4.72611	-0.434851	-1.50974	0.368047	1.78718e-05	0.0003905	0.0204288
TwdlBeta	trough	24	4	20	-0.00151509	0.991254	1.96832	-3.46641	5.43474	-0.567827	-1.51569	0.368773	1.78718e-05	0.0003905	0.0204288
cta	trough	24	8	20	-3.50877e-08	1	1.4811	-2.74649	4.22759	-0.539269	-1.61718	0.368047	1.78718e-05	0.0003905	0.0204288
CG15211	trough	24	4	20	1.36343e-17	1	2.06589	-2.4127	4.4786	-0.856257	-1.018	0.367488	1.90677e-05	0.0004105	0.0207749
CG1561	trough	24	12	12	-5.84328e-18	1	1.83285	-2.53115	4.36401	-0.724118	-1.69639	0.367044	1.90677e-05	0.0004105	0.0207749
Drip	trough	24	8	12	-5.26316e-08	1	1.75355	-2.6672	4.42075	-0.657451	-1.65939	0.366764	1.90677e-05	0.0004105	0.0207749
CG7470	trough	24	16	12	-7.79104e-18	1	3.96888	-1.83135	5.80023	-2.1672	-0.686958	0.367285	1.90677e-05	0.0004105	0.0207749
aay	trough	24	4	20	-8.77193e-08	1	2.41806	-2.04267	4.46073	-1.18378	-1.20278	0.367488	1.90677e-05	0.0004105	0.0207749
CG4825	trough	24	16	12	7.01754e-08	1	1.83007	-3.57031	5.40038	-0.512582	-1.39886	0.367285	1.90677e-05	0.0004105	0.0207749
santa-maria	trough	24	4	20	-5.26316e-08	1	1.49331	-2.46418	3.95749	-0.606008	-2.18952	0.366204	2.03386e-05	0.0004605	0.0226888
CG9363	trough	24	4	12	0.00997807	1.018	2.33581	-2.77025	5.10606	-0.843177	-1.54318	0.366204	2.03386e-05	0.0004605	0.0226888
CG18135	trough	24	16	12	-3.50877e-08	1	2.30969	-2.41222	4.72191	-0.957498	-1.00645	0.366003	2.03386e-05	0.0004605	0.0226888
l(2)05510	trough	24	0	12	1.75439e-08	1	2.20092	-3.03888	5.2398	-0.724254	-1.54804	0.365642	2.03386e-05	0.0004605	0.0226888
Tsp42Ed	trough	24	20	12	3.50877e-08	1	2.49935	-2.0676	4.56695	-1.20882	-1.0352	0.366524	2.03386e-05	0.0004605	0.0226888
CG10984	trough	24	8	20	-0.00736078	1.01035	1.53446	-3.17018	4.70464	-0.484029	-3.47312	0.3642	2.16886e-05	0.0004805	0.0228377
mbf1	trough	24	12	4	1.75439e-08	1	1.98954	-2.20638	4.19593	-0.901721	-1.26003	0.364482	2.16886e-05	0.0004805	0.0228377
lqf	trough	24	0	12	-1.82602e-17	1	1.98752	-2.30086	4.28838	-0.863817	-1.17283	0.364354	2.16886e-05	0.0004805	0.0228377
Nmnat	trough	24	8	20	-8.77193e-08	1	1.77489	-3.68945	5.46434	-0.481072	-1.57771	0.3642	2.16886e-05	0.0004805	0.0228377
Ady43A	trough	24	0	12	7.79104e-18	1	2.18795	-2.68048	4.86842	-0.816252	-1.15693	0.363067	2.31225e-05	0.0004905	0.0228377
Got1	trough	24	8	12	-3.50877e-08	1	2.24995	-2.53058	4.78053	-0.889103	-1.12506	0.362917	2.31225e-05	0.0004905	0.0228377
CG3363	trough	24	16	12	1.16866e-17	1	2.23438	-2.18083	4.41521	-1.02455	-0.94836	0.363439	2.31225e-05	0.0004905	0.0228377
CG14186	trough	24	8	12	-3.50877e-08	1	2.04482	-2.6268	4.67162	-0.778445	-0.970439	0.362917	2.31225e-05	0.0004905	0.0228377
CG9691	trough	24	4	12	1.75439e-08	1	2.23773	-2.9071	5.14483	-0.769744	-1.14115	0.363634	2.31225e-05	0.0004905	0.0228377
CG14528	trough	24	20	12	-0.000283435	0.992492	1.9589	-2.55028	4.50917	-0.76811	-1.1036	0.363961	2.31225e-05	0.0004905	0.0228377
fok	trough	24	20	4	3.50877e-08	1	2.08216	-2.42247	4.50463	-0.859521	-1.00125	0.363201	2.31225e-05	0.0004905	0.0228377
Pdi	trough	24	4	20	-1.75439e-08	1	2.63587	-2.16441	4.80028	-1.21783	-0.994793	0.362349	2.4645e-05	0.0005205	0.0236434
Pgi	trough	24	4	20	-1.75439e-08	1	3.05689	-1.87051	4.9274	-1.63425	-1.02535	0.362349	2.4645e-05	0.0005205	0.0236434
a6	trough	24	16	4	-1.16866e-17	1	3.25095	-2.30886	5.55981	-1.40804	-1.14805	0.362157	2.4645e-05	0.0005205	0.0236434
rho	trough	24	16	20	3.50877e-08	1	2.92276	-1.99155	4.91432	-1.46758	-1.01456	0.362157	2.4645e-05	0.0005205	0.0236434
CG42542	trough	24	20	4	1.75439e-08	1	1.83394	-3.03465	4.86859	-0.604333	-1.1453	0.36192	2.4645e-05	0.0005205	0.0236434
CG9747	trough	24	16	4	-3.50877e-08	1	2.08427	-2.14625	4.23053	-0.971123	-0.947094	0.360875	2.62612e-05	0.0005805	0.0258156
GXIVsPLA2	trough	24	0	4	-7.01754e-08	1	2.22668	-2.88015	5.10683	-0.773111	-1.14809	0.360492	2.62612e-05	0.0005805	0.0258156
CG16941	trough	24	20	4	5.35634e-18	1	2.49865	-2.8612	5.35985	-0.873288	-1.66446	0.359358	2.79764e-05	0.0005905	0.0258156
Mlc-c	trough	24	8	20	3.50877e-08	1	2.10233	-1.99873	4.10106	-1.05183	-1.47616	0.35907	2.79764e-05	0.0005905	0.0258156
CG4511	trough	24	4	20	3.89552e-18	1	2.08014	-1.97413	4.05427	-1.0537	-1.0041	0.359779	2.79764e-05	0.0005905	0.0258156
CG8860	trough	24	12	4	-5.26316e-08	1	2.0954	-2.31177	4.40717	-0.906408	-0.954562	0.359358	2.79764e-05	0.0005905	0.0258156
cenB1A	trough	24	4	20	5.26316e-08	1	1.60197	-2.53367	4.13565	-0.632272	-1.30145	0.359779	2.79764e-05	0.0005905	0.0258156
GstD9	trough	24	8	12	-3.50877e-08	1	2.04439	-2.31258	4.35697	-0.884032	-0.917971	0.35907	2.79764e-05	0.0005905	0.0258156
CG9317	trough	24	4	20	-7.79104e-18	1	2.00365	-2.38383	4.38748	-0.84052	-1.77757	0.358494	2.97961e-05	0.0006405	0.0277411
CG32647	trough	24	16	20	0.0356333	0.981951	2.31749	-2.0263	4.3438	-1.1437	-1.14755	0.358311	2.97961e-05	0.0006405	0.0277411
CG6282	trough	24	0	12	-0.0275498	1.06762	2.29673	-3.08472	5.38145	-0.74455	-0.987342	0.35663	3.17264e-05	0.0006705	0.028252
MED19	trough	24	4	20	1.94776e-17	1	1.98236	-1.73647	3.71883	-1.1416	-0.999645	0.357209	3.17264e-05	0.0006705	0.028252
Cyt-c-p	trough	24	4	4	3.50877e-08	1	1.82082	-3.10418	4.925	-0.586571	-1.04752	0.357209	3.17264e-05	0.0006705	0.028252
CG12163	trough	24	20	4	-1.75439e-08	1	2.07944	-2.20881	4.28826	-0.941431	-1.15152	0.356795	3.17264e-05	0.0006705	0.028252
alc	trough	24	4	12	3.50877e-08	1	2.35332	-1.84621	4.19953	-1.27468	-0.992985	0.357209	3.17264e-05	0.0006705	0.028252
CG9328	trough	24	16	20	8.77193e-08	1	2.87327	-2.29024	5.16351	-1.25457	-1.24374	0.357029	3.17264e-05	0.0006705	0.028252
aralar1	trough	24	4	12	1.75439e-08	1	1.75154	-3.02871	4.78026	-0.578313	-1.51591	0.355924	3.37734e-05	0.0007105	0.0294052
CG13795	trough	24	4	20	1.94776e-17	1	1.57014	-2.87428	4.44441	-0.546272	-1.54631	0.355924	3.37734e-05	0.0007105	0.0294052
Mocs1	trough	24	20	12	-0.0214819	1.00414	1.99957	-2.38212	4.38169	-0.839404	-1.60301	0.356271	3.37734e-05	0.0007105	0.0294052
TER94	trough	24	4	20	3.16511e-18	1	1.75899	-3.31893	5.07792	-0.529988	-1.35243	0.355924	3.37734e-05	0.0007105	0.0294052
CG31436	trough	24	16	4	-3.50877e-08	1	1.86216	-2.21154	4.07371	-0.842019	-1.25021	0.354465	3.59435e-05	0.0007505	0.0301466
Ahcy89E	trough	24	16	4	1.75439e-08	1	1.48852	-2.23162	3.72015	-0.667013	-1.61336	0.354465	3.59435e-05	0.0007505	0.0301466
CG8774	trough	24	0	4	0.029013	0.961401	1.73714	-2.5804	4.31754	-0.673204	-1.34401	0.354055	3.59435e-05	0.0007505	0.0301466
CG31549	trough	24	8	20	1.75439e-08	1	2.35934	-2.43176	4.7911	-0.970217	-1.50905	0.355223	3.59435e-05	0.0007505	0.0301466
kar	trough	24	4	12	-1.75439e-08	1	2.49925	-2.20547	4.70472	-1.1332	-1.03601	0.354639	3.59435e-05	0.0007505	0.0301466
CG33116	trough	24	12	12	-1.55821e-17	1	1.99909	-2.15782	4.15691	-0.926437	-1.24088	0.354233	3.59435e-05	0.0007505	0.0301466
CG32444	trough	24	8	12	1.75439e-08	1	1.83883	-3.51373	5.35256	-0.523328	-1.25605	0.35394	3.82437e-05	0.0007705	0.0301466
NKAIN	trough	24	12	4	-7.01754e-08	1	2.01971	-2.65451	4.67422	-0.76086	-0.946666	0.352952	3.82437e-05	0.0007705	0.0301466
Hsp22	trough	24	12	12	-1.75439e-08	1	2.00802	-2.16476	4.17278	-0.927595	-0.910494	0.352952	3.82437e-05	0.0007705	0.0301466
Mipp1	trough	24	0	12	-7.01754e-08	1	2.2005	-2.51984	4.72034	-0.873273	-1.29725	0.352767	3.82437e-05	0.0007705	0.0301466
CG10353	trough	24	0	20	0.0164628	0.998816	1.57382	-3.31562	4.88944	-0.47467	-2.05401	0.352767	3.82437e-05	0.0007705	0.0301466
CG8790	trough	24	0	12	-8.77193e-08	1	1.92865	-1.69196	3.6206	-1.13989	-0.932225	0.352767	3.82437e-05	0.0007705	0.0301466
CG5161	trough	24	0	4	-1.75439e-08	1	1.87477	-2.58727	4.46204	-0.724613	-1.28906	0.352767	3.82437e-05	0.0007705	0.0301466
Aldh	trough	24	4	12	-7.01754e-08	1	2.26348	-2.42555	4.68903	-0.933182	-1.10191	0.352069	4.06811e-05	0.0008405	0.0323419
smp-30	trough	24	8	12	-5.26316e-08	1	1.95507	-1.52982	3.48488	-1.27797	-0.76032	0.352658	4.06811e-05	0.0008405	0.0323419
CG4597	trough	24	4	4	0.0348548	0.939347	1.68594	-3.04699	4.73294	-0.553313	-2.31619	0.352069	4.06811e-05	0.0008405	0.0323419
CG11889	trough	24	20	12	-8.77193e-08	1	1.76524	-3.25347	5.01871	-0.542571	-2.44354	0.352427	4.06811e-05	0.0008405	0.0323419
CG30054	trough	24	8	4	-1.05263e-07	1	1.84563	-2.4777	4.32332	-0.744896	-1.36757	0.351376	4.32633e-05	0.0008705	0.0328182
Acer	trough	24	8	20	5.26316e-08	1	2.06493	-1.87935	3.94429	-1.09875	-0.812231	0.351376	4.32633e-05	0.0008705	0.0328182
cbt	trough	24	16	4	-7.79104e-18	1	2.05144	-3.62159	5.67304	-0.566448	-1.12467	0.350619	4.32633e-05	0.0008705	0.0328182
pst	trough	24	16	20	7.01754e-08	1	2.34824	-2.09262	4.44085	-1.12215	-1.19754	0.350619	4.32633e-05	0.0008705	0.0328182
CG6805	trough	24	16	20	-5.26316e-08	1	1.98649	-2.10264	4.08914	-0.944762	-1.11328	0.350619	4.32633e-05	0.0008705	0.0328182
CG1461	trough	24	0	20	3.50877e-08	1	2.0647	-2.34173	4.40643	-0.881697	-1.25708	0.350192	4.5998e-05	0.0009005	0.0328627
sd	trough	24	8	12	-0.0178413	1.00731	1.81403	-3.25688	5.07092	-0.556984	-1.09141	0.350093	4.5998e-05	0.0009005	0.0328627
CG13443	trough	24	16	12	0.0144568	0.997076	1.75927	-3.17839	4.93766	-0.553509	-3.01692	0.349337	4.5998e-05	0.0009005	0.0328627
mRpS11	trough	24	16	20	-1.55821e-17	1	1.86906	-2.63736	4.50643	-0.708685	-1.1113	0.349337	4.5998e-05	0.0009005	0.0328627
kst	trough	24	20	12	-1.55821e-17	1	1.90218	-2.48368	4.38586	-0.765871	-0.99717	0.349864	4.5998e-05	0.0009005	0.0328627
kek5	trough	24	16	4	0.0822378	1.03262	2.97404	-2.99423	5.96827	-0.993258	-1.80657	0.348055	4.88938e-05	0.0009105	0.0328627
ninaA	trough	24	20	20	1.75439e-08	1	1.9694	-3.23815	5.20755	-0.608189	-1.0648	0.348582	4.88938e-05	0.0009105	0.0328627
Pdk	trough	24	20	20	-1.16866e-17	1	2.30619	-2.80642	5.11261	-0.821753	-1.09109	0.348582	4.88938e-05	0.0009105	0.0328627
CG13833	trough	24	20	20	-0.00779608	0.992905	2.02244	-3.26515	5.28759	-0.6194	-1.13826	0.348582	4.88938e-05	0.0009105	0.0328627
Cp1	trough	24	20	4	-2.92164e-17	1	2.04474	-2.14185	4.18659	-0.954663	-1.00293	0.347827	4.88938e-05	0.0009105	0.0328627
CG15309	trough	24	16	20	1.75439e-08	1	2.20031	-3.04018	5.24048	-0.723743	-1.28021	0.348055	4.88938e-05	0.0009105	0.0328627
Cyp4e3	trough	24	4	20	0.0188136	1.02606	1.93498	-2.14092	4.0759	-0.903807	-1.21899	0.34693	5.19592e-05	0.0009805	0.0344544
CG4199	trough	24	4	20	-3.50877e-08	1	2.29104	-2.22545	4.51649	-1.02947	-1.79622	0.34693	5.19592e-05	0.0009805	0.0344544
CG42376	trough	24	20	20	-0.031526	0.983585	1.94258	-1.94053	3.88311	-1.00105	-1.16858	0.347301	5.19592e-05	0.0009805	0.0344544
stc	trough	24	8	20	3.50877e-08	1	2.89845	-3.7169	6.61535	-0.779803	-1.00174	0.347528	5.19592e-05	0.0009805	0.0344544
CG32412	trough	24	4	12	-1.75439e-08	1	1.85675	-2.46716	4.32391	-0.752588	-1.0398	0.34693	5.19592e-05	0.0009805	0.0344544
Rad51C	trough	24	16	12	-0.0417939	0.988989	1.59364	-2.02606	3.6197	-0.786574	-0.876093	0.346773	5.19592e-05	0.0009805	0.0344544
Marf	trough	24	16	12	-7.01754e-08	1	2.79238	-1.816	4.60837	-1.53766	-0.679241	0.346773	5.19592e-05	0.0009805	0.0344544
ltd	trough	24	16	20	-3.50877e-08	1	2.43855	-2.51044	4.94899	-0.97136	-1.13225	0.345492	5.52034e-05	0.0010505	0.0363652
GstE9	trough	24	4	12	3.89552e-18	1	1.50351	-2.69499	4.1985	-0.557891	-1.36795	0.345645	5.52034e-05	0.0010505	0.0363652
alphaCop	trough	24	12	4	-5.26316e-08	1	2.04416	-2.18136	4.22553	-0.937103	-1.55289	0.345265	5.52034e-05	0.0010505	0.0363652
CG12116	trough	24	0	20	1.75439e-08	1	1.83256	-3.69491	5.52747	-0.49597	-1.23582	0.34633	5.52034e-05	0.0010505	0.0363652
CG7016	trough	24	4	20	5.26316e-08	1	1.97209	-2.63845	4.61053	-0.747441	-1.12628	0.34436	5.8636e-05	0.0011005	0.0376759
CG7724	trough	24	20	20	5.26316e-08	1	2.38698	-2.20728	4.59426	-1.08141	-1.24835	0.344738	5.8636e-05	0.0011005	0.0376759
CG15630	trough	24	0	12	0.0222466	1.00619	2.11654	-1.97611	4.09265	-1.07106	-1.17176	0.345042	5.8636e-05	0.0011005	0.0376759
CG10311	trough	24	4	20	1.16866e-17	1	1.77927	-2.58946	4.36873	-0.68712	-1.0019	0.343075	6.2267e-05	0.0011805	0.0395425
l(1)G0156	trough	24	0	4	-7.01754e-08	1	2.60941	-1.5997	4.20911	-1.63119	-1.02961	0.343755	6.2267e-05	0.0011805	0.0395425
CG4074	trough	24	20	12	-0.00769525	0.995366	1.71693	-3.51745	5.23438	-0.488119	-1.25612	0.343456	6.2267e-05	0.0011805	0.0395425
CG7530	trough	24	20	4	3.50877e-08	1	2.30563	-1.94463	4.25026	-1.18564	-0.964966	0.343984	6.2267e-05	0.0011805	0.0395425
CG7442	trough	24	8	12	-7.01754e-08	1	2.07746	-2.21339	4.29085	-0.938589	-1.04286	0.343681	6.2267e-05	0.0011805	0.0395425
CG9396	trough	24	0	12	-0.014102	0.996791	1.72962	-2.69227	4.42189	-0.64244	-1.06366	0.343755	6.2267e-05	0.0011805	0.0395425
CG17221	trough	24	0	12	-3.50877e-08	1	1.86099	-2.70896	4.56995	-0.686974	-1.14878	0.342467	6.61069e-05	0.0012205	0.04016
CG5254	trough	24	4	20	0.00626847	0.992299	2.12057	-2.23824	4.3588	-0.947428	-1.35577	0.34179	6.61069e-05	0.0012205	0.04016
CG14898	trough	24	20	4	1.94776e-18	1	2.83784	-2.50054	5.33838	-1.13489	-1.26488	0.342703	6.61069e-05	0.0012205	0.04016
CG4716	trough	24	16	20	-1.75439e-08	1	2.26491	-2.10613	4.37104	-1.07539	-1.32732	0.341646	6.61069e-05	0.0012205	0.04016
CG4822	trough	24	16	12	-3.50877e-08	1	2.17564	-3.08363	5.25926	-0.705545	-0.96075	0.341646	6.61069e-05	0.0012205	0.04016
PIP82	trough	24	8	12	1.75439e-08	1	1.88611	-2.34513	4.23124	-0.804269	-1.16355	0.341116	7.01668e-05	0.0012705	0.0407962
sqh	trough	24	8	20	1.75439e-08	1	1.75575	-2.80575	4.56149	-0.625768	-1.27807	0.341116	7.01668e-05	0.0012705	0.0407962
out	trough	24	16	4	-7.01754e-08	1	1.82952	-2.24104	4.07057	-0.81637	-0.786093	0.340364	7.01668e-05	0.0012705	0.0407962
CG5793	trough	24	4	12	1.75439e-08	1	2.28735	-2.0499	4.33725	-1.11584	-0.916748	0.340505	7.01668e-05	0.0012705	0.0407962
CG1628	trough	24	12	20	3.50877e-08	1	1.72537	-2.38427	4.10963	-0.723648	-1.18158	0.341422	7.01668e-05	0.0012705	0.0407962
CG4585	trough	24	12	12	1.16866e-17	1	3.07456	-2.42749	5.50206	-1.26656	-0.939978	0.341422	7.01668e-05	0.0012705	0.0407962
verm	trough	24	0	12	1.75439e-08	1	2.00479	-1.60915	3.61393	-1.24587	-0.951816	0.34118	7.01668e-05	0.0012705	0.0407962
wac	trough	24	4	4	0.0311029	0.966378	1.8352	-2.75888	4.59407	-0.665197	-1.37548	0.33922	7.44582e-05	0.0013405	0.0427491
Nurf-38	trough	24	4	12	1.75439e-08	1	1.79131	-2.24569	4.037	-0.797665	-1.33759	0.33922	7.44582e-05	0.0013405	0.0427491
Cpr67B	trough	24	0	12	1.75439e-08	1	2.16632	-2.17268	4.339	-0.997075	-1.22515	0.338605	7.89932e-05	0.0014105	0.0446754
cact	trough	24	20	12	5.26316e-08	1	2.55974	-3.18784	5.74758	-0.80297	-1.32141	0.33833	7.89932e-05	0.0014105	0.0446754
CG33138	trough	24	8	12	3.50877e-08	1	2.34557	-2.36565	4.71121	-0.991512	-0.565841	0.337269	8.37844e-05	0.0014905	0.0467324
CG8798	trough	24	12	12	-8.77193e-08	1	2.12162	-2.00956	4.13118	-1.05576	-1.15361	0.337578	8.37844e-05	0.0014905	0.0467324
CG17324	trough	24	0	12	-0.0419395	0.965146	2.06209	-3.31492	5.37701	-0.622063	-1.05419	0.337318	8.37844e-05	0.0014905	0.0467324
CG7261	trough	24	8	20	0.00681571	0.999839	1.99209	-2.41715	4.40925	-0.824149	-1.10008	0.335987	8.88451e-05	0.0016005	0.0491876
CG10069	trough	24	12	4	0.00314806	0.983673	2.23309	-2.33707	4.57016	-0.955506	-1.00914	0.336297	8.88451e-05	0.0016005	0.0491876
robl37BC	trough	24	12	12	5.26316e-08	1	2.02585	-1.96386	3.98971	-1.03156	-1.37933	0.336297	8.88451e-05	0.0016005	0.0491876
CG9247	trough	24	4	4	-3.50877e-08	1	2.10346	-2.08182	4.18527	-1.0104	-1.01333	0.335365	8.88451e-05	0.0016005	0.0491876
cathD	trough	24	12	12	-1.75439e-08	1	2.46253	-2.18807	4.65061	-1.12543	-1.08628	0.336297	8.88451e-05	0.0016005	0.0491876
HIP	trough	24	8	20	-1.75439e-08	1	2.95157	-2.55612	5.50769	-1.15471	-1.03933	0.335987	8.88451e-05	0.0016005	0.0491876
CG30410	trough	24	4	20	-1.55821e-17	1	2.39989	-2.75227	5.15216	-0.871967	-1.66032	0.33408	9.41892e-05	0.0017305	0.0523195
NAT1	trough	24	4	20	5.26316e-08	1	2.96906	-2.57935	5.54841	-1.15109	-0.798068	0.33408	9.41892e-05	0.0017305	0.0523195
CG10863	trough	24	4	20	-3.50877e-08	1	1.98026	-2.91775	4.89801	-0.678694	-1.66633	0.33408	9.41892e-05	0.0017305	0.0523195
CG4666	trough	24	20	12	-0.00102498	0.991219	1.5908	-2.83589	4.42669	-0.560952	-3.01962	0.334485	9.41892e-05	0.0017305	0.0523195
ckd	trough	24	20	20	-0.0309635	0.994509	1.47795	-2.89519	4.37314	-0.510486	-1.36404	0.334485	9.41892e-05	0.0017305	0.0523195
CG5326	trough	24	4	4	0.0391763	1.02099	2.12354	-2.39653	4.52008	-0.88609	-1.37235	0.332795	9.98311e-05	0.0018405	0.0551084
Rgk1	trough	24	4	20	-3.50877e-08	1	1.73859	-2.45044	4.18903	-0.709501	-1.54662	0.332795	9.98311e-05	0.0018405	0.0551084
Synd	trough	24	20	4	3.50877e-08	1	3.45812	-2.09383	5.55196	-1.65158	-1.02907	0.333735	9.98311e-05	0.0018405	0.0551084
l(1)G0320	trough	24	0	20	-3.50877e-08	1	2.34362	-2.71998	5.06359	-0.861632	-1.19131	0.332168	0.000105786	0.0020405	0.0591935
CG18259	trough	24	0	20	-0.0143829	0.997016	1.94117	-3.49932	5.4405	-0.554728	-2.14859	0.332168	0.000105786	0.0020405	0.0591935
Hsp83	trough	24	12	4	1.94776e-17	1	1.76322	-3.46504	5.22826	-0.508859	-1.7621	0.332454	0.000105786	0.0020405	0.0591935
CG3074	trough	24	4	20	5.26316e-08	1	1.7474	-2.21384	3.96124	-0.789307	-0.900827	0.331511	0.000105786	0.0020405	0.0591935
CG10743	trough	24	4	12	-0.024875	1.00852	1.82816	-2.50819	4.33634	-0.728876	-1.40084	0.331511	0.000105786	0.0020405	0.0591935
RhoGDI	trough	24	4	20	3.50877e-08	1	2.12552	-2.36896	4.49447	-0.897238	-1.19196	0.331511	0.000105786	0.0020405	0.0591935
CG10345	trough	24	12	4	7.01754e-08	1	1.669	-2.44367	4.11267	-0.682988	-1.08183	0.332454	0.000105786	0.0020405	0.0591935
CG4629	trough	24	20	20	-3.50877e-08	1	2.06243	-2.06526	4.12769	-0.99863	-0.970771	0.331922	0.000105786	0.0020405	0.0591935
GstE1	trough	24	4	12	-7.01754e-08	1	1.54581	-2.51131	4.05712	-0.615538	-1.53009	0.331511	0.000105786	0.0020405	0.0591935
Vago	trough	24	16	12	1.75439e-08	1	2.17418	-2.41468	4.58887	-0.900402	-1.23616	0.332672	0.000105786	0.0020405	0.0591935
eya	trough	24	12	12	1.75439e-08	1	2.61477	-2.34035	4.95512	-1.11725	-1.07339	0.331173	0.00011207	0.0021705	0.061999
CG7546	trough	24	8	12	1.75439e-08	1	3.50431	-1.63404	5.13835	-2.14456	-1.05852	0.330857	0.00011207	0.0021705	0.061999
CG4467	trough	24	8	12	-7.01754e-08	1	2.09678	-2.17124	4.26802	-0.965704	-1.2468	0.330857	0.00011207	0.0021705	0.061999
GstE3	trough	24	0	12	1.75439e-08	1	2.04057	-2.2473	4.28787	-0.90801	-1.16929	0.33088	0.00011207	0.0021705	0.061999
CG8586	trough	24	16	4	5.26316e-08	1	1.97354	-1.93591	3.90945	-1.01944	-1.25023	0.33139	0.00011207	0.0021705	0.061999
CG17108	trough	24	20	12	-3.50877e-08	1	2.16788	-1.77784	3.94572	-1.21939	-1.15547	0.329359	0.000118699	0.0022505	0.0633131
CG9914	trough	24	8	12	-1.55821e-17	1	2.10766	-2.29263	4.40029	-0.919321	-0.987361	0.329575	0.000118699	0.0022505	0.0633131
BobA	trough	24	8	12	7.01754e-08	1	2.24598	-3.95032	6.19629	-0.568555	-1.73568	0.329575	0.000118699	0.0022505	0.0633131
CG10960	trough	24	8	12	1.75439e-08	1	2.26228	-1.75221	4.01449	-1.2911	-0.97426	0.329575	0.000118699	0.0022505	0.0633131
l(1)G0334	trough	24	0	4	-1.94776e-17	1	2.23486	-2.93088	5.16575	-0.762522	-1.15459	0.329593	0.000118699	0.0022505	0.0633131
Kap-alpha1	trough	24	8	20	-5.26316e-08	1	2.05376	-2.45343	4.50719	-0.837097	-0.850261	0.328293	0.000125691	0.0023805	0.0659738
h	trough	24	16	4	-1.75439e-08	1	2.91044	-1.79334	4.70378	-1.62292	-0.902392	0.328826	0.000125691	0.0023805	0.0659738
CG8417	trough	24	8	12	-3.89552e-18	1	2.66944	-2.12157	4.79101	-1.25823	-1.16268	0.328293	0.000125691	0.0023805	0.0659738
CG5830	trough	24	12	12	5.26316e-08	1	1.54396	-2.09881	3.64277	-0.735637	-1.21413	0.32861	0.000125691	0.0023805	0.0659738
Gyc-89Db	trough	24	4	12	0.0289332	1.01456	1.64919	-2.21409	3.86329	-0.744861	-1.39884	0.328941	0.000125691	0.0023805	0.0659738
CG8738	trough	24	12	12	-3.50877e-08	1	2.13429	-3.04149	5.17577	-0.701725	-1.11744	0.327329	0.000133063	0.0025005	0.0678853
Gap69C	trough	24	4	20	-1.75439e-08	1	3.39193	-2.67559	6.06752	-1.26773	-1.12862	0.327656	0.000133063	0.0025005	0.0678853
CG2852	trough	24	4	20	3.50877e-08	1	2.72707	-2.16468	4.89176	-1.2598	-1.08595	0.327656	0.000133063	0.0025005	0.0678853
CG8036	trough	24	4	20	-7.01754e-08	1	2.26648	-2.16698	4.43346	-1.04592	-0.970514	0.327656	0.000133063	0.0025005	0.0678853
Klc	trough	24	20	4	1.75439e-08	1	1.49971	-2.30379	3.8035	-0.650977	-1.285	0.327329	0.000133063	0.0025005	0.0678853
inx2	trough	24	0	12	0.0251223	0.951718	1.89836	-2.20476	4.10312	-0.861031	-1.18325	0.327018	0.000133063	0.0025005	0.0678853
DNaseII	trough	24	16	12	0.036786	1.00234	2.70247	-2.0913	4.79377	-1.29224	-0.956337	0.327544	0.000133063	0.0025005	0.0678853
sip2	trough	24	12	20	0.214856	1.10404	2.46233	-2.37144	4.83377	-1.03832	-4.43901	0.326048	0.000140835	0.0026305	0.0693915
CG7322	trough	24	8	12	-1.75439e-08	1	2.09686	-3.61374	5.7106	-0.580246	-1.75518	0.325728	0.000140835	0.0026305	0.0693915
Side	trough	24	12	4	0.0291884	1.0096	2.16228	-1.80996	3.97224	-1.19466	-1.29065	0.326048	0.000140835	0.0026305	0.0693915
ERp60	trough	24	12	12	3.50877e-08	1	1.58369	-2.53745	4.12114	-0.624126	-1.56324	0.326048	0.000140835	0.0026305	0.0693915
Got2	trough	24	8	12	-1.75439e-08	1	2.00063	-1.87281	3.87344	-1.06825	-0.96343	0.325728	0.000140835	0.0026305	0.0693915
CG7077	trough	24	20	12	1.94776e-18	1	2.25519	-2.22786	4.48305	-1.01227	-0.926397	0.325514	0.000140835	0.0026305	0.0693915
Tsp39D	trough	24	4	20	3.11642e-17	1	2.01945	-2.81298	4.83243	-0.717904	-1.09491	0.326371	0.000140835	0.0026305	0.0693915
CG6672	trough	24	12	12	-1.75439e-08	1	2.58419	-2.26278	4.84697	-1.14204	-0.900515	0.326048	0.000140835	0.0026305	0.0693915
CG11275	trough	24	20	12	-0.0108662	1.02204	2.00143	-2.42375	4.42518	-0.82576	-1.13434	0.325514	0.000140835	0.0026305	0.0693915
CG16704	trough	24	12	12	1.08344e-17	1	1.96507	-2.47348	4.43855	-0.794457	-0.871305	0.326048	0.000140835	0.0026305	0.0693915
Rh5	trough	24	20	4	-5.26316e-08	1	2.65184	-2.68087	5.33271	-0.989174	-0.740396	0.324767	0.000149027	0.0027205	0.0707634
alpha-Man-II	trough	24	16	12	7.79104e-18	1	1.64725	-2.67346	4.32071	-0.616147	-1.23643	0.32498	0.000149027	0.0027205	0.0707634
CG6359	trough	24	4	20	-7.01754e-08	1	1.80679	-2.55837	4.36516	-0.706229	-1.03192	0.325086	0.000149027	0.0027205	0.0707634
CG10194	trough	24	16	20	-0.0211274	1.0173	1.89747	-3.55794	5.45541	-0.533305	-1.53937	0.32498	0.000149027	0.0027205	0.0707634
CG4302	trough	24	4	12	1.94776e-18	1	2.24092	-2.35763	4.59855	-0.950497	-1.42759	0.325086	0.000149027	0.0027205	0.0707634
CG12078	trough	24	0	4	0.0301468	0.948009	1.93145	-2.40741	4.33887	-0.802294	-1.30076	0.323155	0.000157658	0.0028705	0.0726361
CG12130	trough	24	12	12	1.05263e-07	1	1.92973	-2.31013	4.23987	-0.835333	-0.861323	0.323486	0.000157658	0.0028705	0.0726361
pio	trough	24	8	12	-1.05263e-07	1	2.41127	-2.09078	4.50205	-1.15329	-0.896522	0.323163	0.000157658	0.0028705	0.0726361
CRMP	trough	24	12	12	1.75439e-08	1	2.96981	-2.83065	5.80046	-1.04916	-1.09973	0.323486	0.000157658	0.0028705	0.0726361
CG7627	trough	24	20	4	0.00273466	0.968405	2.56473	-2.22131	4.78604	-1.1546	-0.786679	0.323486	0.000157658	0.0028705	0.0726361
CG2316	trough	24	20	4	-1.75439e-08	1	1.71383	-2.97112	4.68495	-0.576831	-1.27372	0.323486	0.000157658	0.0028705	0.0726361
Ect3	trough	24	20	12	1.75439e-08	1	1.95127	-2.31499	4.26626	-0.842886	-1.10392	0.322951	0.000157658	0.0028705	0.0726361
BHD	trough	24	0	4	0.0157546	1.00745	1.58824	-2.27805	3.86629	-0.697194	-1.41489	0.323155	0.000157658	0.0028705	0.0726361
path	trough	24	20	12	-5.26316e-08	1	2.204	-3.20333	5.40733	-0.688034	-1.33058	0.322951	0.000157658	0.0028705	0.0726361
ptr	trough	24	0	12	0.0363005	0.971954	1.70636	-2.27311	3.97948	-0.750672	-1.26571	0.323155	0.000157658	0.0028705	0.0726361
Gbeta76C	trough	24	0	12	-1.26604e-17	1	2.2922	-2.02112	4.31333	-1.13412	-1.33586	0.321868	0.000166751	0.0030305	0.0760647
CG2889	trough	24	12	12	0.016518	0.998867	1.75756	-2.36027	4.11783	-0.744646	-1.09729	0.322205	0.000166751	0.0030305	0.0760647
CG10006	trough	24	20	20	-0.00116501	0.991228	2.05836	-2.4126	4.47096	-0.853168	-1.21296	0.32167	0.000166751	0.0030305	0.0760647
CG7299	trough	24	12	12	-1.75439e-08	1	1.83513	-2.56109	4.39621	-0.716543	-1.17912	0.320924	0.000176327	0.0031605	0.0776532
CG5653	trough	24	4	12	-1.75439e-08	1	2.01213	-2.77822	4.79036	-0.724253	-1.03413	0.321231	0.000176327	0.0031605	0.0776532
CG1882	trough	24	20	4	-3.50877e-08	1	2.81411	-3.25174	6.06584	-0.865416	-1.04662	0.320924	0.000176327	0.0031605	0.0776532
CG14107	trough	24	8	12	0.0311013	0.963645	1.74055	-2.20695	3.94749	-0.788668	-1.33439	0.320598	0.000176327	0.0031605	0.0776532
CG10205	trough	24	8	12	-1.75439e-08	1	2.02037	-2.19685	4.21721	-0.919668	-2.10838	0.320598	0.000176327	0.0031605	0.0776532
CG31075	trough	24	4	20	7.79104e-18	1	1.67667	-2.35064	4.02731	-0.713286	-1.02308	0.321231	0.000176327	0.0031605	0.0776532
SCAP	trough	24	4	12	-0.0580745	0.994672	2.72471	-2.76032	5.48503	-0.987099	-1.44069	0.321231	0.000176327	0.0031605	0.0776532
CG17777	trough	24	20	12	1.75439e-08	1	1.55203	-2.71822	4.27025	-0.570973	-1.35003	0.320388	0.000176327	0.0031605	0.0776532
betaggt-I	trough	24	8	20	-1.75439e-08	1	2.31178	-2.07901	4.39079	-1.11196	-1.19289	0.319316	0.000186411	0.0033105	0.0798636
CG9795	trough	24	4	20	-1.75439e-08	1	2.35227	-2.18791	4.54018	-1.07512	-0.854694	0.319946	0.000186411	0.0033105	0.0798636
mbc	trough	24	20	4	-1.75439e-08	1	2.29235	-3.34039	5.63274	-0.686253	-1.52768	0.319643	0.000186411	0.0033105	0.0798636
plx	trough	24	16	12	1.75439e-08	1	3.23719	-2.14871	5.3859	-1.50657	-0.932773	0.319852	0.000186411	0.0033105	0.0798636
CG34325	trough	24	4	12	-4.8694e-18	1	1.91185	-2.23705	4.1489	-0.85463	-1.32618	0.319946	0.000186411	0.0033105	0.0798636
CG8147	trough	24	4	12	-3.50877e-08	1	2.37697	-2.98829	5.36526	-0.795428	-0.80943	0.319404	0.000186411	0.0033105	0.0798636
CG31248	trough	24	20	12	-7.01754e-08	1	1.90897	-1.88328	3.79224	-1.01364	-1.15469	0.319106	0.000186411	0.0033105	0.0798636
Cyp6a2	trough	24	4	20	-3.50877e-08	1	1.81438	-2.51607	4.33046	-0.721117	-1.6259	0.318661	0.000197026	0.0035305	0.0836539
CG5362	trough	24	8	12	3.50877e-08	1	1.8612	-2.5338	4.395	-0.734548	-1.13841	0.318033	0.000197026	0.0035305	0.0836539
CG7079	trough	24	4	12	-5.26316e-08	1	2.20958	-2.21236	4.42194	-0.998744	-1.00283	0.318661	0.000197026	0.0035305	0.0836539
CG42326	trough	24	4	20	-1.16866e-17	1	1.51592	-3.24534	4.76127	-0.467107	-1.50359	0.318661	0.000197026	0.0035305	0.0836539
CG11247	trough	24	16	20	1.75439e-08	1	1.86768	-2.70982	4.57749	-0.689227	-1.24929	0.31857	0.000197026	0.0035305	0.0836539
CG42353	trough	24	8	20	4.8694e-17	1	1.93993	-2.22569	4.16562	-0.87161	-0.947144	0.318033	0.000197026	0.0035305	0.0836539
Hnf4	trough	24	16	12	-3.50877e-08	1	2.11839	-2.45299	4.57139	-0.863595	-0.890084	0.31857	0.000197026	0.0035305	0.0836539
CG6272	trough	24	8	20	-5.26316e-08	1	1.84152	-1.99084	3.83237	-0.924996	-1.5597	0.316751	0.000208197	0.0037305	0.0853523
HLH106	trough	24	12	12	1.75439e-08	1	1.99545	-2.77897	4.77442	-0.718052	-0.974581	0.31708	0.000208197	0.0037305	0.0853523
Hrs	trough	24	12	12	5.26316e-08	1	1.78474	-2.2064	3.99114	-0.808893	-1.00314	0.31708	0.000208197	0.0037305	0.0853523
bin	trough	24	16	4	5.84328e-18	1	2.0123	-2.98102	4.99332	-0.675036	-1.2931	0.317288	0.000208197	0.0037305	0.0853523
spict	trough	24	8	12	-0.00786804	0.992936	2.05729	-2.63996	4.69725	-0.779288	-0.822577	0.316751	0.000208197	0.0037305	0.0853523
egh	trough	24	16	12	-1.75439e-08	1	1.88949	-2.45209	4.34158	-0.770561	-1.0682	0.317288	0.000208197	0.0037305	0.0853523
Utx	trough	24	20	4	-7.01754e-08	1	1.78481	-2.54025	4.32506	-0.702613	-1.6583	0.31708	0.000208197	0.0037305	0.0853523
CG32573	trough	24	20	4	3.89552e-18	1	2.60602	-2.53434	5.14036	-1.02828	-1.22709	0.31708	0.000208197	0.0037305	0.0853523
CG10462	trough	24	0	20	-0.0157725	1.02922	1.86885	-2.619	4.48785	-0.713574	-1.16388	0.316718	0.000208197	0.0037305	0.0853523
CAP	trough	24	20	12	0.0123994	0.995523	1.5041	-3.69229	5.19638	-0.407362	-2.7912	0.316543	0.000208197	0.0037305	0.0853523
CG10175	trough	24	16	20	0.0159873	0.970563	1.50683	-2.50438	4.0112	-0.601676	-1.38608	0.317288	0.000208197	0.0037305	0.0853523
CG18666	trough	24	0	20	-0.171426	1.01603	1.75755	-3.07292	4.83047	-0.571949	-0.837829	0.316718	0.000208197	0.0037305	0.0853523
CG2608	trough	24	20	4	3.50877e-08	1	2.54474	-2.38561	4.93035	-1.0667	-0.919246	0.31708	0.000208197	0.0037305	0.0853523
CG17124	trough	24	16	20	-1.75439e-08	1	1.93366	-1.90291	3.83657	-1.01616	-1.13303	0.317288	0.000208197	0.0037305	0.0853523
CG31326	trough	24	4	12	-7.01754e-08	1	1.86764	-2.07023	3.93787	-0.902145	-0.877703	0.316091	0.000219952	0.0038505	0.0861919
Cyp1	trough	24	4	12	-3.50877e-08	1	1.78337	-2.9837	4.76708	-0.597706	-1.35585	0.316091	0.000219952	0.0038505	0.0861919
Cpr47Ef	trough	24	8	20	0.0111541	1.01307	2.05303	-2.29419	4.34721	-0.894883	-1.15896	0.315469	0.000219952	0.0038505	0.0861919
abba	trough	24	4	20	8.77193e-08	1	2.34681	-2.44591	4.79272	-0.959482	-1.28851	0.316091	0.000219952	0.0038505	0.0861919
Cpr100A	trough	24	4	12	-0.103209	0.916679	2.28046	-2.24723	4.5277	-1.01479	-0.693708	0.316091	0.000219952	0.0038505	0.0861919
Tig	trough	24	8	12	3.50877e-08	1	1.97475	-2.08959	4.06434	-0.945045	-1.23459	0.315469	0.000219952	0.0038505	0.0861919
crb	trough	24	8	12	1.16866e-17	1	2.22729	-2.54914	4.77643	-0.873742	-1.47634	0.315469	0.000219952	0.0038505	0.0861919
mRpS29	trough	24	20	4	-5.26316e-08	1	2.42679	-1.76345	4.19024	-1.37617	-0.823587	0.315799	0.000219952	0.0038505	0.0861919
Ac13E	trough	24	0	4	-7.01754e-08	1	2.14656	-2.21314	4.3597	-0.969914	-1.58144	0.315431	0.000219952	0.0038505	0.0861919
CG4061	trough	24	12	20	-1.75439e-08	1	2.19699	-2.57216	4.76915	-0.854144	-0.925014	0.314518	0.000232317	0.0040805	0.0900417
CG11050	trough	24	8	20	-3.50877e-08	1	3.47374	-2.13614	5.60987	-1.62618	-0.717848	0.314186	0.000232317	0.0040805	0.0900417
Rab7	trough	24	4	20	8.77193e-08	1	2.06105	-2.25878	4.31983	-0.91246	-1.06841	0.314807	0.000232317	0.0040805	0.0900417
bin3	trough	24	0	20	-0.0124184	0.979764	2.00601	-3.0816	5.08761	-0.650965	-1.28446	0.314143	0.000232317	0.0040805	0.0900417
CG10924	trough	24	0	4	0.0422958	0.984483	1.85124	-2.96996	4.8212	-0.623321	-1.28208	0.314143	0.000232317	0.0040805	0.0900417
CG9837	trough	24	12	12	-0.0192648	1.00162	2.50638	-3.5972	6.10358	-0.696757	-1.18915	0.314518	0.000232317	0.0040805	0.0900417
CG7560	trough	24	8	20	1.75439e-08	1	1.99135	-3.0058	4.99715	-0.662503	-1.41027	0.312904	0.000245322	0.0042305	0.0918284
Eps-15	trough	24	12	12	0.015395	0.997862	1.75355	-3.14146	4.89501	-0.558198	-1.92345	0.313237	0.000245322	0.0042305	0.0918284
Sodh-1	trough	24	12	12	-3.50877e-08	1	2.05919	-2.257	4.31619	-0.912361	-1.12664	0.313237	0.000245322	0.0042305	0.0918284
CG8709	trough	24	4	20	-5.26316e-08	1	1.94956	-2.05796	4.00752	-0.947324	-0.944165	0.313522	0.000245322	0.0042305	0.0918284
CG12016	trough	24	16	12	1.75439e-08	1	2.06166	-2.17799	4.23965	-0.946591	-1.02199	0.313442	0.000245322	0.0042305	0.0918284
CG13604	trough	24	12	12	1.75439e-08	1	1.67927	-2.54043	4.21969	-0.661019	-1.32508	0.313237	0.000245322	0.0042305	0.0918284
tok	trough	24	20	4	-3.50877e-08	1	2.54781	-2.37204	4.91985	-1.0741	-0.761706	0.313237	0.000245322	0.0042305	0.0918284
CG7900	trough	24	12	20	0.0418827	0.994922	1.70058	-2.96235	4.66293	-0.574066	-1.99803	0.311956	0.000258996	0.0044305	0.0935528
CG9451	trough	24	4	12	1.75439e-08	1	2.28105	-2.20609	4.48714	-1.03398	-0.946765	0.312237	0.000258996	0.0044305	0.0935528
gammaCop	trough	24	12	12	1.75439e-08	1	3.89717	-2.07539	5.97256	-1.8778	-0.814805	0.311956	0.000258996	0.0044305	0.0935528
CG4725	trough	24	8	12	-1.94167e-17	1	1.58545	-2.38639	3.97184	-0.664372	-1.79575	0.311621	0.000258996	0.0044305	0.0935528
CG16717	trough	24	4	20	-0.00902495	0.993487	1.50057	-3.03939	4.53997	-0.493708	-1.63859	0.312237	0.000258996	0.0044305	0.0935528
T-cp1	trough	24	4	20	5.26316e-08	1	1.51433	-2.18504	3.69938	-0.693045	-0.962524	0.312237	0.000258996	0.0044305	0.0935528
key	trough	24	20	4	-3.50877e-08	1	2.01323	-2.86923	4.88246	-0.701664	-1.39909	0.311956	0.000258996	0.0044305	0.0935528
CG32537	trough	24	12	20	-0.015011	0.985271	1.69488	-3.5796	5.27447	-0.473483	-1.4917	0.311956	0.000258996	0.0044305	0.0935528
Ipp	trough	24	4	20	-5.26316e-08	1	2.03391	-2.08402	4.11793	-0.975958	-1.09332	0.312237	0.000258996	0.0044305	0.0935528
CG9657	trough	24	0	12	-3.50877e-08	1	2.28977	-2.3416	4.63137	-0.977866	-1.02926	0.311568	0.000258996	0.0044305	0.0935528
bonsai	trough	24	20	4	-1.75439e-08	1	1.69733	-2.59477	4.2921	-0.654134	-1.20651	0.311956	0.000258996	0.0044305	0.0935528
CG12338	trough	24	20	4	3.50877e-08	1	2.05103	-2.29361	4.34464	-0.894234	-1.105	0.311956	0.000258996	0.0044305	0.0935528
Est-Q	trough	24	12	12	1.75439e-08	1	1.86871	-2.29814	4.16685	-0.813137	-1.21429	0.310675	0.00027337	0.0046005	0.0956246
emp	trough	24	4	12	-1.55821e-17	1	1.88304	-3.35293	5.23597	-0.561609	-0.929059	0.310952	0.00027337	0.0046005	0.0956246
CG7262	trough	24	12	12	-5.26316e-08	1	1.8394	-2.84677	4.68617	-0.646138	-1.40193	0.310675	0.00027337	0.0046005	0.0956246
Eip71CD	trough	24	16	12	1.75439e-08	1	1.56169	-2.87831	4.43999	-0.542571	-1.36149	0.310878	0.00027337	0.0046005	0.0956246
lbk	trough	24	16	20	7.01754e-08	1	2.19446	-2.08334	4.2778	-1.05334	-1.17707	0.310878	0.00027337	0.0046005	0.0956246
CG6330	trough	24	16	20	-1.75439e-08	1	2.82542	-2.12799	4.95341	-1.32775	-0.972403	0.310878	0.00027337	0.0046005	0.0956246
CG3860	trough	24	16	20	3.50877e-08	1	2.37985	-2.19491	4.57476	-1.08426	-1.21567	0.310878	0.00027337	0.0046005	0.0956246
CG4335	trough	24	0	20	-0.0894007	1.05603	1.43142	-3.29756	4.72898	-0.434086	-1.18956	0.308993	0.000288476	0.0049005	0.0994192
CG31221	trough	24	4	12	-1.75439e-08	1	1.92873	-2.55058	4.47931	-0.756194	-1.28064	0.309667	0.000288476	0.0049005	0.0994192
CG5080	trough	24	4	20	1.75439e-08	1	2.05969	-2.24764	4.30734	-0.916379	-0.98923	0.309667	0.000288476	0.0049005	0.0994192
CG4389	trough	24	8	12	-5.26316e-08	1	2.34347	-1.91412	4.2576	-1.22431	-0.855194	0.309057	0.000288476	0.0049005	0.0994192
CG13306	trough	24	4	20	-0.192523	0.955957	1.63258	-1.93093	3.5635	-0.845491	-0.697638	0.309667	0.000288476	0.0049005	0.0994192
CG18616	trough	24	8	12	-5.26316e-08	1	2.24084	-1.84824	4.08907	-1.21242	-1.11712	0.309057	0.000288476	0.0049005	0.0994192
Hs3st-B	trough	24	20	4	0.062693	0.922629	1.51635	-2.5764	4.09275	-0.588553	-1.6337	0.309393	0.000288476	0.0049005	0.0994192
uri	trough	24	8	12	-5.26316e-08	1	1.71085	-3.57764	5.2885	-0.478207	-1.35529	0.309057	0.000288476	0.0049005	0.0994192
cal1	trough	24	16	20	1.75439e-08	1	2.52811	-2.5683	5.09641	-0.984349	-1.03982	0.309596	0.000288476	0.0049005	0.0994192
Dcp1	trough	24	12	20	0.0626763	0.992927	1.64533	-2.69301	4.33835	-0.610963	-3.16102	0.309393	0.000288476	0.0049005	0.0994192
CG5823	trough	24	8	20	7.79104e-18	1	3.02265	-1.87545	4.8981	-1.61169	-1.30727	0.309057	0.000288476	0.0049005	0.0994192
CG17652	trough	24	0	20	-1.75439e-08	1	1.58054	-3.23543	4.81596	-0.48851	-1.25078	0.307706	0.000304349	0.0051905	0.103721
smi35A	trough	24	8	20	-5.26316e-08	1	1.61412	-2.69671	4.31083	-0.598554	-1.22706	0.307774	0.000304349	0.0051905	0.103721
CG9512	trough	24	8	4	1.75439e-08	1	2.26258	-3.17855	5.44113	-0.711827	-1.82011	0.307774	0.000304349	0.0051905	0.103721
Sod	trough	24	8	20	3.50877e-08	1	2.77365	-2.5399	5.31355	-1.09203	-0.789428	0.307774	0.000304349	0.0051905	0.103721
Sec61beta	trough	24	12	4	1.75439e-08	1	3.84356	-1.83446	5.67802	-2.0952	-0.882857	0.308112	0.000304349	0.0051905	0.103721
dx	trough	24	4	20	-1.75439e-08	1	2.01238	-3.34894	5.36132	-0.600901	-1.55494	0.308382	0.000304349	0.0051905	0.103721
CG11893	trough	24	8	12	-0.171302	1.02222	2.30149	-2.19267	4.49416	-1.04963	-0.532881	0.307774	0.000304349	0.0051905	0.103721
CG6745	trough	24	12	12	-1.75439e-08	1	2.35139	-2.28542	4.6368	-1.02886	-1.12034	0.306831	0.000321023	0.0054705	0.106795
Gpdh	trough	24	8	4	1.75439e-08	1	2.20983	-2.09752	4.30735	-1.05354	-1.17794	0.306492	0.000321023	0.0054705	0.106795
CG12241	trough	24	8	12	-1.75439e-08	1	1.84134	-2.58317	4.42451	-0.712823	-1.30353	0.306492	0.000321023	0.0054705	0.106795
RhoGAP16F	trough	24	4	12	0.00588153	1.02214	2.25569	-2.85525	5.11094	-0.790018	-1.02559	0.307097	0.000321023	0.0054705	0.106795
CG18812	trough	24	20	12	3.50877e-08	1	1.62598	-3.30093	4.92691	-0.492582	-0.861522	0.307573	0.000321023	0.0054705	0.106795
CG1640	trough	24	4	12	-2.82425e-17	1	2.7398	-2.36202	5.10182	-1.15994	-0.782778	0.307097	0.000321023	0.0054705	0.106795
CG5687	trough	24	16	12	-5.26316e-08	1	1.72025	-2.70391	4.42416	-0.636206	-1.51416	0.307032	0.000321023	0.0054705	0.106795
aux	trough	24	20	4	5.26316e-08	1	2.31789	-2.83757	5.15546	-0.816856	-1.17519	0.306831	0.000321023	0.0054705	0.106795
CG8552	trough	24	20	4	-0.000906213	0.991213	1.83276	-2.59113	4.42389	-0.707322	-1.09861	0.306831	0.000321023	0.0054705	0.106795
CG15202	trough	24	0	4	-1.75439e-08	1	1.7288	-3.45449	5.18329	-0.50045	-1.79085	0.306418	0.000321023	0.0054705	0.106795
mRpL45	trough	24	20	4	0	1	2.34582	-2.68491	5.03073	-0.873704	-1.00358	0.306831	0.000321023	0.0054705	0.106795
l(1)G0222	trough	24	4	20	1.75439e-08	1	1.82552	-2.82772	4.65323	-0.64558	-1.46161	0.305812	0.000338535	0.0058005	0.11114
CG4980	trough	24	8	12	0.0254836	1.00112	1.50759	-2.73561	4.2432	-0.551098	-1.56714	0.305209	0.000338535	0.0058005	0.11114
CG10527	trough	24	4	20	-1.36343e-17	1	3.93448	-2.06113	5.99561	-1.90889	-0.769482	0.305812	0.000338535	0.0058005	0.11114
CG14105	trough	24	4	12	-3.31119e-17	1	1.72467	-3.07291	4.79758	-0.56125	-1.07781	0.305812	0.000338535	0.0058005	0.11114
CG3238	trough	24	20	4	-0.0209201	0.991827	1.91587	-2.16554	4.08141	-0.884705	-1.29528	0.30555	0.000338535	0.0058005	0.11114
Atg1	trough	24	20	4	7.01754e-08	1	2.25685	-2.08227	4.33912	-1.08384	-1.10876	0.30555	0.000338535	0.0058005	0.11114
CG7224	trough	24	20	4	-5.26316e-08	1	2.50299	-2.33569	4.83868	-1.07163	-0.981003	0.30555	0.000338535	0.0058005	0.11114
CG4259	trough	24	20	12	1.07127e-17	1	1.65733	-2.81142	4.46876	-0.5895	-1.04671	0.306291	0.000338535	0.0058005	0.11114
CG8675	trough	24	20	4	0.0287489	0.926641	2.26558	-2.59372	4.8593	-0.873489	-0.977009	0.30555	0.000338535	0.0058005	0.11114
Cyp4aa1	trough	24	0	12	5.26316e-08	1	1.97361	-4.29408	6.26769	-0.45961	-1.60363	0.305131	0.000356922	0.0060905	0.115274
CG10741	trough	24	8	12	-0.00708294	0.955586	1.63366	-2.1135	3.74716	-0.772966	-1.29534	0.303927	0.000356922	0.0060905	0.115274
l(2)not	trough	24	12	12	4.38246e-18	1	2.53119	-2.63712	5.16831	-0.959833	-1.01729	0.304269	0.000356922	0.0060905	0.115274
CG5840	trough	24	8	12	8.77193e-08	1	1.53029	-2.7851	4.31539	-0.549457	-1.53759	0.303927	0.000356922	0.0060905	0.115274
CG9921	trough	24	16	20	1.75439e-08	1	1.59032	-2.03283	3.62315	-0.782316	-1.32358	0.304468	0.000356922	0.0060905	0.115274
CG4572	trough	24	16	12	5.26316e-08	1	1.97038	-1.90807	3.87845	-1.03266	-0.866656	0.304468	0.000356922	0.0060905	0.115274
MED15	trough	24	12	12	8.77193e-08	1	2.0375	-2.03005	4.06755	-1.00367	-1.16252	0.302988	0.000376223	0.0063105	0.117292
CG12159	trough	24	8	12	-1.75439e-08	1	2.06044	-2.63584	4.69627	-0.781701	-1.25858	0.302645	0.000376223	0.0063105	0.117292
CycH	trough	24	4	20	-3.50877e-08	1	1.84283	-2.36819	4.21103	-0.77816	-1.2656	0.303242	0.000376223	0.0063105	0.117292
Gapdh2	trough	24	4	20	1.75439e-08	1	2.71708	-1.68084	4.39792	-1.61651	-0.680415	0.303242	0.000376223	0.0063105	0.117292
CG3168	trough	24	16	12	-1.75439e-08	1	1.9326	-1.99938	3.93198	-0.966599	-0.986262	0.303186	0.000376223	0.0063105	0.117292
CG15731	trough	24	16	20	-0.0563683	1.05676	1.8536	-2.47239	4.32599	-0.749717	-0.857011	0.303186	0.000376223	0.0063105	0.117292
Cortactin	trough	24	8	20	5.26316e-08	1	1.41018	-4.05072	5.4609	-0.34813	-1.34569	0.302645	0.000376223	0.0063105	0.117292
ClC-c	trough	24	16	20	-5.26316e-08	1	1.6104	-3.07402	4.68443	-0.523874	-1.42393	0.303186	0.000376223	0.0063105	0.117292
CG1927	trough	24	20	12	1.75439e-08	1	2.7016	-2.15101	4.8526	-1.25597	-1.48287	0.303728	0.000376223	0.0063105	0.117292
Aats-asp	trough	24	12	12	3.50877e-08	1	1.89214	-2.49061	4.38275	-0.759711	-1.17225	0.301707	0.00039648	0.0065205	0.119525
Tsf2	trough	24	12	12	-3.50877e-08	1	2.02099	-3.37112	5.39211	-0.5995	-1.7299	0.301707	0.00039648	0.0065205	0.119525
CG3573	trough	24	4	20	-8.77193e-08	1	2.80217	-2.2357	5.03787	-1.25337	-0.838442	0.301957	0.00039648	0.0065205	0.119525
twi	trough	24	0	20	0.0310088	0.952934	1.48281	-3.09581	4.57862	-0.478974	-1.6805	0.302556	0.00039648	0.0065205	0.119525
CheB93a	trough	24	0	20	0.0197078	1.0021	1.95178	-3.57397	5.52574	-0.546109	-1.85218	0.302556	0.00039648	0.0065205	0.119525
sprt	trough	24	0	12	-1.75439e-08	1	2.54425	-2.46341	5.00765	-1.03282	-1.02861	0.302556	0.00039648	0.0065205	0.119525
CG6429	trough	24	16	20	-1.75439e-08	1	2.24591	-2.4368	4.68271	-0.921662	-0.979305	0.301904	0.00039648	0.0065205	0.119525
CG1970	trough	24	0	4	-7.01754e-08	1	1.9425	-1.63083	3.57333	-1.19111	-1.03552	0.301268	0.000417735	0.0068205	0.121439
Oatp58Dc	trough	24	4	12	0.0278394	0.993348	1.84266	-2.41467	4.25733	-0.763107	-1.3832	0.300672	0.000417735	0.0068205	0.121439
CG5045	trough	24	20	20	-1.16866e-17	1	1.97751	-2.82145	4.79896	-0.700883	-1.3171	0.301165	0.000417735	0.0068205	0.121439
CG2982	trough	24	12	4	0.0579917	1.01616	2.40286	-2.88836	5.29122	-0.831911	-1.37149	0.300426	0.000417735	0.0068205	0.121439
CG3308	trough	24	8	12	-3.50877e-08	1	1.78719	-2.03397	3.82116	-0.878673	-1.1664	0.301362	0.000417735	0.0068205	0.121439
CG32447	trough	24	12	12	0.0288969	1.15235	2.98047	-3.03089	6.01136	-0.983363	-1.263	0.300426	0.000417735	0.0068205	0.121439
tomosyn	trough	24	16	4	-0.0323554	1.01337	1.57843	-2.11408	3.69251	-0.74663	-1.10878	0.300622	0.000417735	0.0068205	0.121439
Ugt86Da	trough	24	4	12	-0.000538009	0.984579	2.13437	-3.07663	5.211	-0.693736	-1.00478	0.300672	0.000417735	0.0068205	0.121439
Eb1	trough	24	4	20	2.33731e-17	1	2.76702	-1.72249	4.48951	-1.60641	-0.964982	0.300672	0.000417735	0.0068205	0.121439
Smg6	trough	24	4	12	1.75439e-08	1	1.95642	-2.13254	4.08896	-0.917415	-0.93013	0.300672	0.000417735	0.0068205	0.121439
Invadolysin	trough	24	20	20	-8.77193e-08	1	2.51471	-2.75137	5.26608	-0.913982	-1.60784	0.301165	0.000417735	0.0068205	0.121439
SMC1	trough	24	0	20	3.50877e-08	1	2.0833	-1.95791	4.04121	-1.06404	-1.2023	0.301268	0.000417735	0.0068205	0.121439
CG5498	trough	24	20	12	-3.50877e-08	1	1.6445	-3.21014	4.85464	-0.512283	-1.84831	0.301165	0.000417735	0.0068205	0.121439
CG15067	trough	24	8	20	-7.79104e-18	1	2.01528	-2.28571	4.30099	-0.881689	-1.19918	0.301362	0.000417735	0.0068205	0.121439
CG42367	trough	24	20	12	-0.0136339	0.971731	1.72635	-1.99032	3.71667	-0.867373	-1.1524	0.301165	0.000417735	0.0068205	0.121439
sda	trough	24	8	20	-1.75439e-08	1	1.91994	-1.89068	3.81062	-1.01548	-1.03698	0.30008	0.000440031	0.0072105	0.125974
mus308	trough	24	4	4	0.0337256	1.02282	2.22824	-2.4527	4.68095	-0.908483	-1.14086	0.299387	0.000440031	0.0072105	0.125974
CG8369	trough	24	4	20	3.50877e-08	1	2.30043	-2.56525	4.86568	-0.896766	-0.80178	0.299387	0.000440031	0.0072105	0.125974
CG10550	trough	24	12	12	1.75439e-08	1	2.13148	-2.21267	4.34415	-0.963308	-1.08456	0.299144	0.000440031	0.0072105	0.125974
Obp56a	trough	24	16	4	-0.0183187	0.989134	1.51791	-2.8011	4.319	-0.541898	-1.21046	0.299341	0.000440031	0.0072105	0.125974
Gdh	trough	24	0	12	-1.31474e-17	1	2.82035	-2.16038	4.98073	-1.30549	-1.76195	0.299981	0.000440031	0.0072105	0.125974
CG1552	trough	24	16	20	3.50877e-08	1	1.77669	-2.95508	4.73176	-0.601231	-1.64648	0.299341	0.000440031	0.0072105	0.125974
CG9005	trough	24	16	20	-0.0258428	0.958526	1.7974	-1.747	3.54441	-1.02885	-1.02293	0.299341	0.000440031	0.0072105	0.125974
CG9510	trough	24	4	20	-3.50877e-08	1	2.17335	-2.51419	4.68754	-0.864433	-1.01367	0.299387	0.000440031	0.0072105	0.125974
CG15661	trough	24	4	12	-0.0338427	0.991458	1.82543	-2.74795	4.57338	-0.664288	-0.920005	0.299387	0.000440031	0.0072105	0.125974
CG5149	trough	24	16	20	2.72686e-17	1	2.09506	-2.25875	4.35381	-0.927529	-1.17068	0.298059	0.000463415	0.0075805	0.130964
CG42369	trough	24	12	12	-2.33731e-17	1	1.84821	-2.27463	4.12284	-0.81253	-1.16208	0.297863	0.000463415	0.0075805	0.130964
CG11294	trough	24	4	12	0.0233205	1.02974	1.90939	-2.86626	4.77565	-0.666162	-1.57725	0.298103	0.000463415	0.0075805	0.130964
Cyp12d1-d	trough	24	16	4	0.052754	0.974672	1.71375	-2.96521	4.67896	-0.57795	-1.51449	0.298059	0.000463415	0.0075805	0.130964
mRpL23	trough	24	20	12	-1.16866e-17	1	1.76113	-1.67421	3.43534	-1.05192	-0.757106	0.298602	0.000463415	0.0075805	0.130964
CG13631	trough	24	16	20	0.0606401	1.0319	2.41845	-3.38007	5.79852	-0.715502	-1.71938	0.298059	0.000463415	0.0075805	0.130964
Jheh2	trough	24	4	12	1.75439e-08	1	2.35971	-2.1678	4.52751	-1.08853	-0.881597	0.296818	0.000487934	0.0080005	0.13595
SC35	trough	24	16	12	1.75439e-08	1	3.22025	-2.14663	5.36688	-1.50014	-1.24742	0.296777	0.000487934	0.0080005	0.13595
CG11852	trough	24	8	12	0.0175901	0.999891	1.90452	-3.11018	5.0147	-0.612352	-1.11179	0.297515	0.000487934	0.0080005	0.13595
CG14741	trough	24	4	20	9.7388e-18	1	2.19777	-2.79778	4.99554	-0.78554	-1.28954	0.296818	0.000487934	0.0080005	0.13595
CG15030	trough	24	4	20	-0.0404505	0.984735	1.53073	-3.01378	4.54451	-0.507909	-1.09989	0.296818	0.000487934	0.0080005	0.13595
CG8034	trough	24	16	12	-0.0396989	1.0035	2.18453	-3.41576	5.60029	-0.639544	-1.04961	0.296777	0.000487934	0.0080005	0.13595
Ser7	trough	24	8	12	-3.50877e-08	1	1.4523	-3.07232	4.52462	-0.472704	-1.46747	0.297515	0.000487934	0.0080005	0.13595
CG17593	trough	24	8	20	3.50877e-08	1	2.30349	-2.14522	4.44871	-1.07378	-1.05448	0.297515	0.000487934	0.0080005	0.13595
ns2	trough	24	20	4	0.0166506	0.99899	2.13866	-2.16059	4.29925	-0.989848	-1.53909	0.296582	0.000487934	0.0080005	0.13595
CG5828	trough	24	4	12	-3.50877e-08	1	2.35291	-2.47905	4.83195	-0.949118	-1.17431	0.295533	0.000513638	0.0083605	0.138775
CG9717	trough	24	20	12	-7.79104e-18	1	2.4605	-2.3592	4.8197	-1.04294	-0.822912	0.296039	0.000513638	0.0083605	0.138775
Cht4	trough	24	12	4	3.50877e-08	1	1.78893	-2.15312	3.94206	-0.830854	-0.998059	0.295301	0.000513638	0.0083605	0.138775
CG14005	trough	24	16	4	-1.75439e-08	1	2.75603	-3.44198	6.19802	-0.80071	-1.57397	0.295495	0.000513638	0.0083605	0.138775
mop	trough	24	4	20	7.01754e-08	1	1.54718	-3.40334	4.95052	-0.454606	-2.50009	0.295533	0.000513638	0.0083605	0.138775
Gli	trough	24	8	12	7.01754e-08	1	2.2693	-1.97952	4.24882	-1.14639	-1.12479	0.296233	0.000513638	0.0083605	0.138775
MAPk-Ak2	trough	24	12	12	7.01754e-08	1	2.03498	-2.64949	4.68447	-0.768066	-0.760695	0.295301	0.000513638	0.0083605	0.138775
sas	trough	24	0	20	-0.0206219	1.00248	1.50306	-2.50716	4.01022	-0.599505	-1.10356	0.296118	0.000513638	0.0083605	0.138775
CAH2	trough	24	0	12	3.50877e-08	1	1.93665	-3.30267	5.23932	-0.58639	-1.28633	0.296118	0.000513638	0.0083605	0.138775
CG1314	trough	24	0	12	-0.112145	0.961917	1.42224	-3.00966	4.4319	-0.472558	-1.05779	0.296118	0.000513638	0.0083605	0.138775
CG3244	trough	24	20	12	5.26316e-08	1	1.71796	-2.85952	4.57748	-0.600785	-1.07373	0.296039	0.000513638	0.0083605	0.138775
Cyp28d1	trough	24	4	20	1.75439e-08	1	2.26883	-2.27114	4.53997	-0.998983	-1.12415	0.295533	0.000513638	0.0083605	0.138775
CG34133	trough	24	16	12	-7.01754e-08	1	1.68264	-4.22221	5.90486	-0.398522	-1.63558	0.295495	0.000513638	0.0083605	0.138775
CG9246	trough	24	20	4	-0.036739	0.94672	1.83712	-2.7921	4.62921	-0.65797	-1.18793	0.29402	0.000540576	0.0087905	0.143107
Eaat2	trough	24	4	20	3.50877e-08	1	1.93667	-2.39183	4.3285	-0.809702	-1.40518	0.294248	0.000540576	0.0087905	0.143107
CG2617	trough	24	8	4	-3.50877e-08	1	2.83086	-2.00577	4.83663	-1.41136	-1.43643	0.29495	0.000540576	0.0087905	0.143107
CG17107	trough	24	16	4	0.0144289	0.997053	2.03158	-2.30505	4.33663	-0.881358	-1.30331	0.294213	0.000540576	0.0087905	0.143107
Dms	trough	24	4	20	7.01754e-08	1	2.17051	-2.20638	4.37689	-0.983745	-1.29921	0.294248	0.000540576	0.0087905	0.143107
qtc	trough	24	16	20	-8.77193e-08	1	2.27471	-2.06952	4.34424	-1.09915	-1.01848	0.294213	0.000540576	0.0087905	0.143107
CG8578	trough	24	12	12	-0.038109	1.03247	1.63229	-3.15651	4.7888	-0.517118	-1.48485	0.29402	0.000540576	0.0087905	0.143107
CG4567	trough	24	20	12	-0.029406	0.982044	1.87744	-2.49889	4.37632	-0.75131	-1.15763	0.294757	0.000540576	0.0087905	0.143107
obst-A	trough	24	8	4	1.75439e-08	1	2.08562	-2.30552	4.39115	-0.904621	-1.14293	0.29495	0.000540576	0.0087905	0.143107
CG17344	trough	24	0	4	0.0369901	0.94285	1.97835	-1.90744	3.88579	-1.03717	-1.00472	0.294831	0.000540576	0.0087905	0.143107
Acp53Ea	trough	24	0	4	0.0866763	1.0203	2.11864	-3.16544	5.28408	-0.669302	-1.34522	0.294831	0.000540576	0.0087905	0.143107
kek2	trough	24	4	20	0.0075763	0.992809	2.04418	-2.05629	4.10048	-0.994109	-1.26466	0.292963	0.000568802	0.0092305	0.145685
CG33558	trough	24	0	4	-8.77193e-08	1	1.63903	-2.78065	4.41967	-0.589442	-1.55871	0.293544	0.000568802	0.0092305	0.145685
CG10098	trough	24	4	20	3.50877e-08	1	1.75978	-2.11936	3.87914	-0.830333	-1.28687	0.292963	0.000568802	0.0092305	0.145685
oho23B	trough	24	4	12	-5.26316e-08	1	2.30772	-2.41785	4.72556	-0.954452	-0.967716	0.292963	0.000568802	0.0092305	0.145685
CG17325	trough	24	8	12	-3.50877e-08	1	1.71626	-2.27764	3.9939	-0.753525	-1.36658	0.293668	0.000568802	0.0092305	0.145685
CG6345	trough	24	20	4	-1.55821e-17	1	2.06305	-3.33375	5.3968	-0.618839	-1.42124	0.292739	0.000568802	0.0092305	0.145685
CG15539	trough	24	8	12	-7.01754e-08	1	1.80629	-2.40926	4.21556	-0.749728	-1.09185	0.293668	0.000568802	0.0092305	0.145685
CG3527	trough	24	0	4	-0.0199995	0.968777	1.65297	-3.19321	4.84618	-0.517651	-0.796317	0.293544	0.000568802	0.0092305	0.145685
CG8534	trough	24	0	12	0.0111655	0.967795	1.36235	-2.90859	4.27093	-0.468388	-1.35374	0.293544	0.000568802	0.0092305	0.145685
l(3)87Df	trough	24	16	20	1.75439e-08	1	2.06566	-3.10971	5.17537	-0.664262	-1.21315	0.292931	0.000568802	0.0092305	0.145685
Gasp	trough	24	8	4	-1.75439e-08	1	2.25296	-2.23547	4.48843	-1.00782	-1.21887	0.293668	0.000568802	0.0092305	0.145685
CG16713	trough	24	4	20	1.75439e-08	1	1.71718	-1.81444	3.53162	-0.946397	-1.15876	0.292963	0.000568802	0.0092305	0.145685
Akap200	trough	24	20	4	1.75439e-08	1	2.36053	-2.47254	4.83307	-0.954696	-1.22299	0.292739	0.000568802	0.0092305	0.145685
Prx5037	trough	24	0	12	-0.048697	0.977393	1.78136	-2.41902	4.20039	-0.736397	-0.98135	0.293544	0.000568802	0.0092305	0.145685
laza	trough	24	20	20	-0.00150292	0.945518	1.73137	-2.32828	4.05965	-0.743624	-0.918596	0.293475	0.000568802	0.0092305	0.145685
CG17224	trough	24	20	4	1.75439e-08	1	1.65673	-2.92736	4.58409	-0.565948	-1.61459	0.292739	0.000568802	0.0092305	0.145685
CG3036	trough	24	20	4	7.01754e-08	1	2.06159	-2.11811	4.1797	-0.973318	-1.06261	0.292739	0.000568802	0.0092305	0.145685
mRpL51	trough	24	20	12	1.75439e-08	1	1.8754	-2.39954	4.27494	-0.781567	-1.31321	0.293475	0.000568802	0.0092305	0.145685
CG17110	trough	24	16	12	1.75439e-08	1	2.02739	-2.32566	4.35306	-0.871748	-0.984504	0.291649	0.000598371	0.0096405	0.148384
pgc	trough	24	0	20	0.016608	1.04393	2.07156	-2.87902	4.95058	-0.719538	-1.86992	0.292256	0.000598371	0.0096405	0.148384
gl	trough	24	16	12	3.50877e-08	1	2.38321	-2.86156	5.24478	-0.832837	-0.972708	0.291649	0.000598371	0.0096405	0.148384
kn	trough	24	16	20	-0.0136629	0.996449	2.62455	-2.75043	5.37499	-0.954233	-1.44362	0.291649	0.000598371	0.0096405	0.148384
CG13607	trough	24	8	12	-0.0281079	1.02516	2.04233	-2.88362	4.92594	-0.708252	-1.09202	0.292386	0.000598371	0.0096405	0.148384
Rpn3	trough	24	4	20	5.26316e-08	1	2.91554	-2.11984	5.03538	-1.37536	-0.802056	0.291678	0.000598371	0.0096405	0.148384
PHGPx	trough	24	12	4	-5.26316e-08	1	2.44628	-2.68135	5.12763	-0.912329	-0.889702	0.291458	0.000598371	0.0096405	0.148384
lva	trough	24	4	20	-2.33731e-17	1	2.14234	-3.48448	5.62681	-0.614822	-1.18532	0.291678	0.000598371	0.0096405	0.148384
Mp20	trough	24	4	12	-4.28507e-17	1	1.62243	-3.59655	5.21898	-0.451108	-1.67092	0.291678	0.000598371	0.0096405	0.148384
CG14694	trough	24	12	4	-3.50877e-08	1	1.99678	-2.05503	4.05181	-0.971656	-0.914258	0.291458	0.000598371	0.0096405	0.148384
Dat	trough	24	8	12	-7.01754e-08	1	2.25038	-2.48414	4.73452	-0.905897	-1.43342	0.292386	0.000598371	0.0096405	0.148384
Mgat1	trough	24	4	20	5.84328e-18	1	1.71126	-2.33179	4.04305	-0.733883	-0.890291	0.291678	0.000598371	0.0096405	0.148384
CG33235	trough	24	12	4	0.0336891	0.973911	1.85969	-2.4742	4.33389	-0.751631	-2.21167	0.291458	0.000598371	0.0096405	0.148384
CG12355	trough	24	16	20	5.26316e-08	1	2.01623	-1.49385	3.51008	-1.34968	-1.05889	0.291649	0.000598371	0.0096405	0.148384
CG1213	trough	24	20	20	3.50877e-08	1	2.31634	-3.10306	5.4194	-0.74647	-1.1066	0.292194	0.000598371	0.0096405	0.148384
Osi21	trough	24	12	4	-7.01754e-08	1	2.13578	-2.38996	4.52574	-0.893649	-1.42238	0.290177	0.00062934	0.0101505	0.153944
CG10587	trough	24	8	4	5.26316e-08	1	2.42	-2.24757	4.66757	-1.07672	-1.06243	0.291103	0.00062934	0.0101505	0.153944
Syx4	trough	24	0	12	0.0421428	0.943973	2.09657	-1.895	3.99157	-1.10637	-1.26761	0.290969	0.00062934	0.0101505	0.153944
mRpS33	trough	24	4	4	0.0338034	0.998612	1.76455	-2.84568	4.61023	-0.620081	-2.2315	0.290393	0.00062934	0.0101505	0.153944
CG7523	trough	24	12	12	-3.50877e-08	1	1.90334	-2.29196	4.1953	-0.830445	-1.35282	0.290177	0.00062934	0.0101505	0.153944
CG13689	trough	24	0	4	0.0274211	0.984146	1.80537	-2.26196	4.06733	-0.798146	-1.34614	0.290969	0.00062934	0.0101505	0.153944
Gyk	trough	24	20	20	-5.26316e-08	1	1.80616	-3.01395	4.82012	-0.599268	-1.08517	0.290912	0.00062934	0.0101505	0.153944
Proct	trough	24	0	12	-0.00619204	0.99449	1.594	-2.48673	4.08073	-0.641002	-0.908415	0.290969	0.00062934	0.0101505	0.153944
CG5390	trough	24	20	4	1.75439e-08	1	2.06096	-2.73201	4.79297	-0.754373	-1.15636	0.290177	0.00062934	0.0101505	0.153944
Hil	trough	24	16	12	-1.22807e-07	1	2.74597	-3.47012	6.21608	-0.791318	-1.5535	0.289085	0.000661768	0.0104805	0.155158
SelD	trough	24	4	12	-0.0139363	1.00151	1.88535	-2.89761	4.78296	-0.650657	-0.882973	0.289108	0.000661768	0.0104805	0.155158
CG9119	trough	24	4	20	0.0345127	1.02611	2.40492	-2.6063	5.01122	-0.922732	-1.59301	0.289108	0.000661768	0.0104805	0.155158
Acp53C14b	trough	24	0	4	0.0375546	1.044	1.88056	-3.15448	5.03504	-0.596155	-1.53066	0.289681	0.000661768	0.0104805	0.155158
CG14711	trough	24	4	20	0.0160156	0.998409	1.57878	-2.67966	4.25844	-0.58917	-1.83356	0.289108	0.000661768	0.0104805	0.155158
bbc	trough	24	20	4	-3.50877e-08	1	2.21237	-2.63921	4.85158	-0.838269	-0.989883	0.288895	0.000661768	0.0104805	0.155158
CG9065	trough	24	16	12	5.26316e-08	1	3.54229	-2.11236	5.65464	-1.67693	-1.01506	0.289085	0.000661768	0.0104805	0.155158
gw	trough	24	20	4	1.75439e-08	1	2.68526	-2.28416	4.96942	-1.1756	-0.93341	0.288895	0.000661768	0.0104805	0.155158
CG14688	trough	24	20	20	-0.00157745	0.99126	1.76257	-2.4512	4.21377	-0.719065	-1.44652	0.289631	0.000661768	0.0104805	0.155158
CG4607	trough	24	0	4	1.75439e-08	1	1.85642	-1.92082	3.77724	-0.966474	-1.23189	0.289681	0.000661768	0.0104805	0.155158
CG5731	trough	24	0	12	-0.151199	1.03288	1.46665	-2.76526	4.23191	-0.530383	-0.772561	0.289681	0.000661768	0.0104805	0.155158
CG33275	trough	24	16	20	-0.0702523	0.951566	1.79114	-2.1704	3.96154	-0.825256	-1.02445	0.289085	0.000661768	0.0104805	0.155158
mRpS26	trough	24	20	4	3.50877e-08	1	1.71558	-2.44763	4.16321	-0.700917	-1.197	0.288895	0.000661768	0.0104805	0.155158
CG4038	trough	24	0	4	-9.7388e-18	1	3.22512	-2.0344	5.25952	-1.58529	-0.799243	0.289681	0.000661768	0.0104805	0.155158
CG42513	trough	24	4	20	-1.26604e-17	1	2.8816	-2.78459	5.6662	-1.03484	-1.03022	0.289108	0.000661768	0.0104805	0.155158
CG34406	trough	24	0	20	-1.75439e-08	1	2.31744	-2.34402	4.66146	-0.988662	-0.967473	0.288394	0.000695715	0.0110005	0.159559
fu12	trough	24	16	4	-0.00498013	0.99189	2.04992	-3.22873	5.27865	-0.634899	-1.04052	0.287803	0.000695715	0.0110005	0.159559
CG16712	trough	24	8	12	7.01754e-08	1	1.89272	-2.08149	3.97421	-0.909307	-1.40921	0.288538	0.000695715	0.0110005	0.159559
CG6783	trough	24	4	20	5.26316e-08	1	1.98855	-2.00583	3.99438	-0.991389	-1.18989	0.287823	0.000695715	0.0110005	0.159559
Hsc70-5	trough	24	8	20	-1.75439e-08	1	1.73964	-2.30108	4.04071	-0.75601	-1.18598	0.288538	0.000695715	0.0110005	0.159559
CG1309	trough	24	20	20	3.50877e-08	1	1.95961	-2.22349	4.1831	-0.881319	-1.23753	0.288349	0.000695715	0.0110005	0.159559
PR2	trough	24	8	20	-0.0288196	0.958384	1.39333	-2.89625	4.28958	-0.481079	-1.35077	0.288538	0.000695715	0.0110005	0.159559
swm	trough	24	4	12	-5.26316e-08	1	1.72883	-2.3548	4.08364	-0.734173	-1.17054	0.287823	0.000695715	0.0110005	0.159559
Listericin	trough	24	20	12	7.01754e-08	1	3.09716	-2.00473	5.10189	-1.54493	-0.808437	0.288349	0.000695715	0.0110005	0.159559
fon	trough	24	0	12	1.05263e-07	1	1.8363	-1.83004	3.66634	-1.00342	-1.08592	0.288394	0.000695715	0.0110005	0.159559
Bx	trough	24	16	20	5.26316e-08	1	1.93685	-2.15651	4.09335	-0.898143	-1.02491	0.287803	0.000695715	0.0110005	0.159559
PGRP-SA	trough	24	20	4	-3.50877e-08	1	1.85901	-3.57999	5.43901	-0.519278	-1.17673	0.287614	0.000695715	0.0110005	0.159559
Oatp74D	trough	24	16	12	-1.75439e-08	1	2.57558	-2.27659	4.85217	-1.13133	-0.967119	0.287803	0.000695715	0.0110005	0.159559
Obp19c	trough	24	16	12	0.0382304	0.997114	2.00674	-3.05493	5.06167	-0.656886	-2.21128	0.286521	0.000731246	0.0116105	0.166847
nAcRbeta-64B	trough	24	4	12	3.50877e-08	1	2.06057	-1.83183	3.8924	-1.12487	-1.05299	0.286538	0.000731246	0.0116105	0.166847
CG17298	trough	24	4	12	-3.50877e-08	1	1.67508	-2.95115	4.62623	-0.567603	-1.32232	0.286538	0.000731246	0.0116105	0.166847
CG9634	trough	24	16	20	1.75439e-08	1	1.71718	-3.50818	5.22537	-0.489479	-1.75433	0.286521	0.000731246	0.0116105	0.166847
CG6983	trough	24	0	12	1.38778e-17	1	1.99833	-2.90462	4.90295	-0.687984	-1.48931	0.287106	0.000731246	0.0116105	0.166847
CG5955	trough	24	20	20	7.01754e-08	1	2.07925	-2.80258	4.88184	-0.741906	-1.1215	0.287068	0.000731246	0.0116105	0.166847
CG17190	trough	24	0	20	0.0654714	1.06127	3.21525	-2.82092	6.03617	-1.13979	-2.2654	0.285819	0.000768424	0.0121105	0.172172
Tina-1	trough	24	0	12	1.75439e-08	1	1.97854	-2.69164	4.67018	-0.735068	-0.945418	0.285819	0.000768424	0.0121105	0.172172
Fdh	trough	24	16	4	0	1	1.7053	-3.14102	4.84632	-0.542913	-1.25585	0.285239	0.000768424	0.0121105	0.172172
CG1622	trough	24	12	4	1.16866e-17	1	2.4375	-2.17942	4.61691	-1.11842	-0.903612	0.286333	0.000768424	0.0121105	0.172172
CG8026	trough	24	8	12	-0.00898158	1.05811	2.77266	-2.67978	5.45244	-1.03466	-1.15076	0.285974	0.000768424	0.0121105	0.172172
Su(var)3-7	trough	24	0	20	-1.75439e-08	1	1.98084	-2.55789	4.53873	-0.774405	-1.25118	0.285819	0.000768424	0.0121105	0.172172
Aats-ile	trough	24	16	12	1.94776e-17	1	1.73724	-2.69411	4.43135	-0.644827	-1.07328	0.285239	0.000768424	0.0121105	0.172172
mRpL35	trough	24	20	20	-1.75439e-08	1	1.96825	-3.08461	5.05286	-0.638086	-1.21567	0.284505	0.000807318	0.0126605	0.176225
pkaap	trough	24	16	20	-1.75439e-08	1	1.89725	-2.31932	4.21657	-0.81802	-0.940488	0.283957	0.000807318	0.0126605	0.176225
Lac	trough	24	8	20	8.77193e-08	1	2.09184	-1.9565	4.04834	-1.06918	-1.24378	0.284691	0.000807318	0.0126605	0.176225
Cont	trough	24	8	20	1.75439e-08	1	2.36439	-2.19037	4.55477	-1.07945	-1.20257	0.284691	0.000807318	0.0126605	0.176225
Cpr92F	trough	24	0	4	-0.0618146	0.95846	1.65696	-2.08081	3.73778	-0.796306	-0.878965	0.284531	0.000807318	0.0126605	0.176225
CG30069	trough	24	4	12	1.55821e-17	1	2.49366	-2.18481	4.67847	-1.14136	-1.15814	0.283968	0.000807318	0.0126605	0.176225
Spn1	trough	24	12	12	1.75439e-08	1	3.22579	-1.99969	5.22548	-1.61314	-1.07405	0.285052	0.000807318	0.0126605	0.176225
Fbp1	trough	24	16	20	-0.0191525	1.02234	2.16045	-2.4234	4.58385	-0.891497	-1.31222	0.283957	0.000807318	0.0126605	0.176225
Cyp301a1	trough	24	8	20	-1.75439e-08	1	2.1788	-3.26551	5.4443	-0.667216	-1.47434	0.284691	0.000807318	0.0126605	0.176225
Trap1	trough	24	20	4	1.75298e-17	1	1.68498	-2.84723	4.53221	-0.591798	-1.50278	0.285052	0.000807318	0.0126605	0.176225
nahoda	trough	24	20	4	-1.75439e-08	1	3.02957	-2.44192	5.47149	-1.24065	-0.977518	0.285052	0.000807318	0.0126605	0.176225
wde	trough	24	16	20	1.75439e-08	1	2.21331	-2.76966	4.98297	-0.799126	-1.20184	0.283957	0.000807318	0.0126605	0.176225
Gclc	trough	24	20	12	-0.00828195	0.980043	2.24454	-2.20645	4.45099	-1.01726	-1.15058	0.284505	0.000807318	0.0126605	0.176225
CG9796	trough	24	20	4	3.89552e-18	1	1.98035	-2.36582	4.34617	-0.837069	-1.21766	0.285052	0.000807318	0.0126605	0.176225
NAAT1	trough	24	4	12	2.04515e-17	1	1.60595	-2.59239	4.19834	-0.619484	-1.47717	0.282683	0.000847999	0.0132305	0.179073
blow	trough	24	8	4	-5.84328e-18	1	1.34034	-3.25163	4.59197	-0.412206	-1.6839	0.283409	0.000847999	0.0132305	0.179073
CG6859	trough	24	0	20	0.0227653	0.995288	1.71138	-3.48745	5.19883	-0.490726	-2.01082	0.283244	0.000847999	0.0132305	0.179073
CG9821	trough	24	4	20	1.75439e-08	1	1.76145	-4.04943	5.81088	-0.434987	-1.54178	0.282683	0.000847999	0.0132305	0.179073
CG4164	trough	24	8	12	-1.75439e-08	1	1.91304	-1.75538	3.66842	-1.08981	-1.09128	0.283409	0.000847999	0.0132305	0.179073
antdh	trough	24	8	12	-1.94776e-18	1	1.70675	-3.08536	4.79211	-0.553176	-1.57875	0.283409	0.000847999	0.0132305	0.179073
Mgstl	trough	24	8	12	-1.75439e-08	1	3.62451	-2.2778	5.90231	-1.59124	-0.88504	0.283409	0.000847999	0.0132305	0.179073
SP1173	trough	24	4	12	0.00658654	0.992414	1.96687	-3.3609	5.32777	-0.585221	-2.11098	0.282683	0.000847999	0.0132305	0.179073
wee	trough	24	16	4	1.75439e-08	1	2.30075	-2.09255	4.3933	-1.09949	-1.11797	0.282675	0.000847999	0.0132305	0.179073
pll	trough	24	12	4	-0.0126495	0.995699	2.15892	-2.12424	4.28315	-1.01633	-0.746448	0.283771	0.000847999	0.0132305	0.179073
Aats-asn	trough	24	20	4	-7.01754e-08	1	1.7973	-3.0601	4.85739	-0.587334	-1.36012	0.283771	0.000847999	0.0132305	0.179073
CG12171	trough	24	16	4	-0.0299605	1.06024	2.93767	-3.02968	5.96735	-0.969629	-0.873625	0.282675	0.000847999	0.0132305	0.179073
CG5261	trough	24	0	4	-1.75439e-08	1	3.18032	-2.22947	5.40979	-1.42649	-0.833536	0.283244	0.000847999	0.0132305	0.179073
CG31189	trough	24	0	12	-1.75439e-08	1	1.99672	-2.34593	4.34264	-0.851142	-1.20627	0.283244	0.000847999	0.0132305	0.179073
Prosbeta7	trough	24	8	20	-7.01754e-08	1	1.90509	-2.09794	4.00303	-0.908073	-0.970637	0.283409	0.000847999	0.0132305	0.179073
CG15213	trough	24	4	12	-0.017572	0.981582	1.43821	-3.50675	4.94496	-0.410125	-0.961603	0.282683	0.000847999	0.0132305	0.179073
CG12081	trough	24	20	4	0.0494221	1.0307	2.56187	-2.57733	5.13921	-0.994001	-1.56045	0.283771	0.000847999	0.0132305	0.179073
Fie	trough	24	16	20	-1.75439e-08	1	2.34215	-1.96713	4.30928	-1.19064	-0.826243	0.282675	0.000847999	0.0132305	0.179073
CG15088	trough	24	0	12	-5.26316e-08	1	1.7685	-2.70614	4.47464	-0.653516	-1.93561	0.283244	0.000847999	0.0132305	0.179073
CG9172	trough	24	0	4	3.50877e-08	1	2.13815	-2.06205	4.20021	-1.03691	-1.31617	0.281956	0.000890537	0.0137905	0.18293
CG8112	trough	24	12	12	-1.75439e-08	1	1.82012	-2.14466	3.96478	-0.848672	-1.3752	0.28249	0.000890537	0.0137905	0.18293
CG31937	trough	24	0	20	5.26316e-08	1	2.18491	-2.5481	4.73301	-0.857463	-0.911388	0.281956	0.000890537	0.0137905	0.18293
CG11913	trough	24	0	4	0.0416055	0.993887	2.98864	-3.11641	6.10505	-0.959003	-1.58288	0.281956	0.000890537	0.0137905	0.18293
CG11897	trough	24	16	4	7.01754e-08	1	1.76417	-2.0088	3.77297	-0.878221	-0.960044	0.281393	0.000890537	0.0137905	0.18293
dy	trough	24	16	12	-0.00530389	0.988743	1.68553	-2.86858	4.55411	-0.587583	-1.00014	0.281393	0.000890537	0.0137905	0.18293
CG31772	trough	24	0	4	0.0929956	1.04147	2.53305	-3.17193	5.70499	-0.798584	-1.51808	0.281956	0.000890537	0.0137905	0.18293
CG3662	trough	24	20	4	1.75439e-08	1	1.91393	-2.36347	4.27739	-0.809797	-1.4824	0.28249	0.000890537	0.0137905	0.18293
CG34331	trough	24	8	12	3.50877e-08	1	1.88029	-2.39377	4.27407	-0.785492	-1.84633	0.282126	0.000890537	0.0137905	0.18293
CG3939	trough	24	8	4	7.01754e-08	1	2.04911	-1.98281	4.03192	-1.03344	-1.04052	0.282126	0.000890537	0.0137905	0.18293
CG10055	trough	24	20	20	-1.75439e-08	1	2.60322	-2.56288	5.1661	-1.01574	-1.15403	0.281941	0.000890537	0.0137905	0.18293
CG11147	trough	24	20	12	-3.50877e-08	1	2.14395	-2.13224	4.2762	-1.00549	-1.0696	0.281941	0.000890537	0.0137905	0.18293
lolal	trough	24	4	20	8.77193e-08	1	1.85946	-1.89016	3.74962	-0.983762	-1.14038	0.281399	0.000890537	0.0137905	0.18293
CG8654	trough	24	8	4	-1.75439e-08	1	2.1116	-2.17895	4.29056	-0.969091	-1.1551	0.282126	0.000890537	0.0137905	0.18293
CG17896	trough	24	4	12	1.75439e-08	1	2.6762	-2.28468	4.96088	-1.17137	-1.2837	0.280114	0.000935009	0.0142705	0.185596
Vha100-2	trough	24	0	4	1.75439e-08	1	2.71004	-2.94165	5.65169	-0.921268	-1.29786	0.280669	0.000935009	0.0142705	0.185596
CG12703	trough	24	12	12	7.01754e-08	1	2.38649	-1.9797	4.36619	-1.20548	-1.14115	0.281209	0.000935009	0.0142705	0.185596
chic	trough	24	8	20	1.75439e-08	1	3.58671	-2.44674	6.03345	-1.46592	-1.0478	0.280844	0.000935009	0.0142705	0.185596
CG13012	trough	24	8	4	0.0058674	0.992161	1.7201	-3.01846	4.73856	-0.569861	-1.32002	0.280844	0.000935009	0.0142705	0.185596
Ppn	trough	24	20	4	1.75439e-08	1	1.7243	-2.75222	4.47652	-0.626512	-1.23005	0.281209	0.000935009	0.0142705	0.185596
CG31025	trough	24	16	12	-0.0483191	0.960133	1.792	-2.03702	3.82902	-0.879715	-0.89123	0.280111	0.000935009	0.0142705	0.185596
Jra	trough	24	8	12	1.75439e-08	1	1.88111	-3.57782	5.45893	-0.525771	-1.20164	0.280844	0.000935009	0.0142705	0.185596
KdelR	trough	24	4	20	0.0396549	1.00371	2.33913	-3.31479	5.65392	-0.705664	-1.11085	0.280114	0.000935009	0.0142705	0.185596
Obp99d	trough	24	4	12	0.0306968	0.973219	1.63422	-2.74782	4.38204	-0.594735	-1.82476	0.280114	0.000935009	0.0142705	0.185596
ds	trough	24	12	4	1.75439e-08	1	1.98015	-2.26159	4.24174	-0.875559	-1.43843	0.281209	0.000935009	0.0142705	0.185596
CG10992	trough	24	4	20	3.50877e-08	1	2.04628	-2.58026	4.62654	-0.793051	-1.27234	0.280114	0.000935009	0.0142705	0.185596
CG15784	trough	24	12	12	-3.50877e-08	1	2.60603	-2.07435	4.68038	-1.25631	-0.850391	0.281209	0.000935009	0.0142705	0.185596
nes	trough	24	8	4	3.50877e-08	1	2.05299	-2.16321	4.21621	-0.949048	-1.12299	0.280844	0.000935009	0.0142705	0.185596
CG4483	trough	24	4	20	0.0626688	1.02073	2.2225	-3.14051	5.36301	-0.707688	-1.80234	0.278829	0.000981492	0.0149805	0.189022
CG5910	trough	24	0	20	-0.028509	0.997717	1.62224	-2.81623	4.43847	-0.576033	-1.073	0.279381	0.000981492	0.0149805	0.189022
Sulf1	trough	24	4	20	3.50877e-08	1	2.02698	-2.1096	4.13658	-0.960838	-1.56677	0.278829	0.000981492	0.0149805	0.189022
didum	trough	24	8	20	1.75439e-08	1	2.41917	-2.23693	4.6561	-1.08147	-1.18126	0.279562	0.000981492	0.0149805	0.189022
Cyp4g15	trough	24	4	20	0	1	3.01144	-2.47431	5.48575	-1.21708	-0.866038	0.278829	0.000981492	0.0149805	0.189022
bond	trough	24	4	20	-2.82425e-17	1	1.76947	-3.04956	4.81903	-0.580237	-1.66783	0.278829	0.000981492	0.0149805	0.189022
CG10560	trough	24	20	20	5.26316e-08	1	2.13189	-3.14815	5.28003	-0.677187	-1.30719	0.279378	0.000981492	0.0149805	0.189022
CG4042	trough	24	12	20	-3.50877e-08	1	2.34018	-2.52522	4.8654	-0.926721	-1.1647	0.279927	0.000981492	0.0149805	0.189022
CG42327	trough	24	12	12	0.0655013	0.956778	1.52307	-2.67372	4.19679	-0.569643	-1.78597	0.279927	0.000981492	0.0149805	0.189022
Pkd2	trough	24	0	20	-1.75439e-08	1	2.05014	-3.15097	5.20111	-0.650637	-1.3505	0.279381	0.000981492	0.0149805	0.189022
BCL7-like	trough	24	16	4	3.50877e-08	1	1.87908	-3.30679	5.18587	-0.56825	-1.06089	0.278829	0.000981492	0.0149805	0.189022
dock	trough	24	16	20	1.75439e-08	1	2.13477	-2.61486	4.74962	-0.816398	-1.00358	0.278829	0.000981492	0.0149805	0.189022
CG32628	trough	24	16	20	0.0304161	0.973407	1.82346	-3.28591	5.10937	-0.554933	-1.51707	0.278829	0.000981492	0.0149805	0.189022
CG14000	trough	24	0	12	0.0203663	0.964757	2.07734	-1.80472	3.88206	-1.15106	-1.15991	0.279381	0.000981492	0.0149805	0.189022
TepIV	trough	24	4	20	3.50877e-08	1	2.15409	-2.03187	4.18596	-1.06015	-1.03608	0.278829	0.000981492	0.0149805	0.189022
CG5895	trough	24	0	4	-0.0182172	0.948243	1.88861	-2.54647	4.43508	-0.741658	-0.911139	0.279381	0.000981492	0.0149805	0.189022
CG10289	trough	24	8	20	1.75439e-08	1	2.50189	-2.10678	4.60866	-1.18754	-1.0629	0.279562	0.000981492	0.0149805	0.189022
CG11841	trough	24	16	4	-2.33731e-17	1	2.07998	-3.1027	5.18268	-0.670379	-1.30194	0.278829	0.000981492	0.0149805	0.189022
CG13814	trough	24	0	12	5.26316e-08	1	2.6385	-1.84537	4.48387	-1.4298	-1.0212	0.279381	0.000981492	0.0149805	0.189022
Or47b	trough	24	4	4	-0.0695555	1.01824	1.4763	-3.26891	4.74521	-0.45162	-1.00718	0.278829	0.000981492	0.0149805	0.189022
glob1	trough	24	20	12	-1.75439e-08	1	2.14589	-2.5932	4.73909	-0.827507	-1.16128	0.279378	0.000981492	0.0149805	0.189022
CG12768	trough	24	20	12	-3.50877e-08	1	1.70718	-2.75658	4.46376	-0.619312	-1.20751	0.279378	0.000981492	0.0149805	0.189022
CG7456	trough	24	20	4	-3.50877e-08	1	2.41386	-2.16056	4.57442	-1.11724	-1.10745	0.278646	0.00103007	0.0156405	0.193676
CG4678	trough	24	20	4	-3.89552e-18	1	2.01708	-1.93845	3.95553	-1.04057	-0.981931	0.278646	0.00103007	0.0156405	0.193676
emc	trough	24	20	4	-1.75439e-08	1	3.31102	-1.70633	5.01735	-1.94043	-1.0896	0.278646	0.00103007	0.0156405	0.193676
CG42390	trough	24	12	12	1.75439e-08	1	2.08458	-2.82001	4.90459	-0.73921	-1.26662	0.278646	0.00103007	0.0156405	0.193676
alphaTub85E	trough	24	12	12	3.50877e-08	1	2.19028	-3.75004	5.94032	-0.584068	-1.20991	0.278646	0.00103007	0.0156405	0.193676
W	trough	24	12	20	0.0530037	1.03226	2.24838	-3.54227	5.79065	-0.634729	-1.9234	0.278646	0.00103007	0.0156405	0.193676
CG2854	trough	24	8	20	0.0904806	0.973783	1.68168	-3.01593	4.69762	-0.557599	-2.13782	0.278279	0.00103007	0.0156405	0.193676
CG4975	trough	24	0	4	0.0470317	1.05455	1.92784	-3.80082	5.72866	-0.507217	-2.64264	0.278094	0.00103007	0.0156405	0.193676
CG15011	trough	24	20	12	-0.0369846	0.942863	1.50697	-2.86164	4.3686	-0.52661	-1.26945	0.278097	0.00103007	0.0156405	0.193676
CG9243	trough	24	20	12	0.0283805	1.01369	2.19785	-3.86501	6.06286	-0.568653	-1.40798	0.278097	0.00103007	0.0156405	0.193676
fdl	trough	24	20	4	1.75439e-08	1	1.7421	-2.4195	4.1616	-0.720022	-0.795712	0.278646	0.00103007	0.0156405	0.193676
Ank	trough	24	20	4	3.50877e-08	1	1.50989	-2.60397	4.11386	-0.579843	-0.947368	0.278646	0.00103007	0.0156405	0.193676
drk	trough	24	20	4	2.21558e-17	1	1.81756	-1.98109	3.79865	-0.917452	-1.38004	0.278646	0.00103007	0.0156405	0.193676
Ate1	trough	24	0	20	0.0215831	1.00426	1.88282	-3.41913	5.30195	-0.550671	-1.45287	0.278094	0.00103007	0.0156405	0.193676
CanB	trough	24	4	12	-3.50877e-08	1	2.0797	-2.31994	4.39964	-0.896442	-1.44767	0.277544	0.00108081	0.0163405	0.199689
CG7656	trough	24	4	20	-0.00912839	0.99354	2.1126	-2.82724	4.93985	-0.747232	-1.54112	0.277544	0.00108081	0.0163405	0.199689
NP15.6	trough	24	0	4	-1.75439e-08	1	1.96336	-2.27322	4.23658	-0.863691	-1.08727	0.276806	0.00108081	0.0163405	0.199689
CG10211	trough	24	4	20	-0.0320492	0.982305	2.22207	-2.77527	4.99734	-0.800668	-0.955302	0.277544	0.00108081	0.0163405	0.199689
AnnIX	trough	24	12	12	3.50877e-08	1	3.79374	-2.47585	6.26958	-1.5323	-1.37483	0.277365	0.00108081	0.0163405	0.199689
CG3746	trough	24	8	4	-0.0718451	1.02137	1.8109	-2.27246	4.08336	-0.79689	-0.770654	0.276997	0.00108081	0.0163405	0.199689
CG6904	trough	24	8	4	-3.31119e-17	1	2.05987	-2.29412	4.35398	-0.897891	-1.3943	0.276997	0.00108081	0.0163405	0.199689
CG2767	trough	24	0	12	-1.75439e-08	1	2.09248	-1.89094	3.98342	-1.10658	-0.903359	0.276806	0.00108081	0.0163405	0.199689
CG10858	trough	24	16	4	-0.0690938	0.987611	2.32222	-2.65699	4.97921	-0.874006	-1.08867	0.276438	0.00108081	0.0163405	0.199689
CG8232	trough	24	20	4	-1.75439e-08	1	1.65043	-2.09645	3.74688	-0.787254	-1.01779	0.277365	0.00108081	0.0163405	0.199689
Hsf	trough	24	12	12	9.7388e-18	1	1.77828	-2.93012	4.7084	-0.606897	-1.29421	0.276084	0.00113382	0.0169105	0.201885
fng	trough	24	16	4	1.75439e-08	1	2.04626	-2.12306	4.16932	-0.963823	-1.06857	0.276265	0.00113382	0.0169105	0.201885
CG12910	trough	24	16	4	1.55821e-17	1	2.04121	-2.11028	4.15148	-0.967269	-1.16216	0.276265	0.00113382	0.0169105	0.201885
CG6607	trough	24	8	20	1.75439e-08	1	2.92644	-2.38811	5.31455	-1.22542	-1.14466	0.275714	0.00113382	0.0169105	0.201885
CG10959	trough	24	0	20	-0.00836002	1.01945	1.77346	-2.54461	4.31807	-0.696948	-1.41224	0.275519	0.00113382	0.0169105	0.201885
Syn2	trough	24	16	20	0.0212266	0.99803	2.30323	-2.87434	5.17758	-0.801309	-2.18508	0.276265	0.00113382	0.0169105	0.201885
RhoBTB	trough	24	20	4	3.31119e-17	1	1.98166	-2.38155	4.36321	-0.83209	-1.10466	0.276084	0.00113382	0.0169105	0.201885
cora	trough	24	12	12	3.89552e-18	1	1.81775	-2.53408	4.35184	-0.717322	-1.4432	0.276084	0.00113382	0.0169105	0.201885
CG3065	trough	24	4	20	7.01754e-08	1	2.15797	-2.17722	4.33519	-0.991159	-1.41653	0.276259	0.00113382	0.0169105	0.201885
CG13919	trough	24	4	20	3.50877e-08	1	1.99683	-2.48803	4.48486	-0.802576	-1.46606	0.276259	0.00113382	0.0169105	0.201885
CG9249	trough	24	20	4	0.00796639	0.99298	1.79128	-2.35346	4.14474	-0.761128	-0.865961	0.276084	0.00113382	0.0169105	0.201885
CG4462	trough	24	0	20	1.75439e-08	1	2.4472	-2.4511	4.8983	-0.998407	-1.02799	0.275519	0.00113382	0.0169105	0.201885
pgant6	trough	24	4	4	1.75439e-08	1	1.57233	-2.4203	3.99264	-0.649643	-2.55364	0.276259	0.00113382	0.0169105	0.201885
CG14997	trough	24	20	12	-1.85037e-17	1	2.39638	-2.96436	5.36074	-0.808398	-1.25333	0.275534	0.00113382	0.0169105	0.201885
CG9525	trough	24	12	4	0.0881336	0.917069	2.11343	-2.91649	5.02992	-0.724649	-1.89439	0.276084	0.00113382	0.0169105	0.201885
kek4	trough	24	16	20	1.75439e-08	1	2.02325	-2.75947	4.78272	-0.733204	-1.67039	0.276265	0.00113382	0.0169105	0.201885
CG31778	trough	24	0	12	3.50877e-08	1	2.26654	-1.9318	4.19834	-1.17328	-1.08284	0.275519	0.00113382	0.0169105	0.201885
Cyp6t1	trough	24	12	12	0.0364056	0.981425	2.36324	-1.99449	4.35773	-1.18488	-1.24482	0.276084	0.00113382	0.0169105	0.201885
CG3281	trough	24	4	20	-0.0716433	1.02084	1.81712	-3.63876	5.45588	-0.499378	-1.06123	0.274974	0.00118917	0.0177905	0.208909
betaTub97EF	trough	24	16	12	1.75439e-08	1	1.80224	-2.32386	4.1261	-0.775535	-1.27753	0.274983	0.00118917	0.0177905	0.208909
Tm1	trough	24	0	20	-5.26316e-08	1	2.16659	-2.68889	4.85548	-0.805758	-1.12383	0.274231	0.00118917	0.0177905	0.208909
RanGap	trough	24	12	12	1.75439e-08	1	1.57321	-2.85705	4.43027	-0.550642	-1.53466	0.274803	0.00118917	0.0177905	0.208909
CG11073	trough	24	4	12	-1.75439e-08	1	1.94059	-2.55451	4.4951	-0.759673	-1.11337	0.274974	0.00118917	0.0177905	0.208909
CG9135	trough	24	8	12	1.75439e-08	1	1.87273	-2.78998	4.66271	-0.671236	-1.70093	0.274432	0.00118917	0.0177905	0.208909
CG33785	trough	24	16	4	3.50877e-08	1	1.24289	-4.20513	5.44803	-0.295566	-9.00108	0.274983	0.00118917	0.0177905	0.208909
CG14786	trough	24	20	4	0.0624962	1.05168	2.76132	-3.34562	6.10694	-0.825352	-2.00765	0.274803	0.00118917	0.0177905	0.208909
CG7791	trough	24	20	4	1.75439e-08	1	1.49678	-2.92721	4.42399	-0.511333	-1.09988	0.274803	0.00118917	0.0177905	0.208909
CG31935	trough	24	0	4	-0.0313204	1.00187	1.79412	-2.64903	4.44315	-0.677273	-1.38111	0.274231	0.00118917	0.0177905	0.208909
CG10257	trough	24	20	12	1.05263e-07	1	1.77191	-2.91966	4.69157	-0.606892	-0.807556	0.274252	0.00118917	0.0177905	0.208909
Sp7	trough	24	20	20	3.50877e-08	1	1.73843	-2.52035	4.25878	-0.689758	-1.12735	0.274252	0.00118917	0.0177905	0.208909
CG15658	trough	24	20	12	5.26316e-08	1	1.76132	-2.92941	4.69073	-0.601256	-1.59479	0.274252	0.00118917	0.0177905	0.208909
CG7409	trough	24	0	12	-1.37256e-17	1	2.00076	-3.00603	5.00679	-0.665582	-1.65423	0.272944	0.00124697	0.0186205	0.213803
CG11811	trough	24	16	4	-3.89552e-18	1	1.95371	-2.7069	4.66061	-0.72175	-1.582	0.273701	0.00124697	0.0186205	0.213803
CG4598	trough	24	4	20	0	1	2.24332	-2.76592	5.00924	-0.811057	-1.07655	0.273689	0.00124697	0.0186205	0.213803
Mct1	trough	24	12	4	1.75439e-08	1	2.73881	-3.43634	6.17515	-0.797013	-0.946292	0.273522	0.00124697	0.0186205	0.213803
yrt	trough	24	8	20	-3.50877e-08	1	1.75575	-2.50873	4.26449	-0.699858	-1.32323	0.27315	0.00124697	0.0186205	0.213803
DAAM	trough	24	8	12	-0.0169909	1.02003	1.72559	-2.73394	4.45953	-0.631173	-1.3156	0.27315	0.00124697	0.0186205	0.213803
Acon	trough	24	0	4	2.72686e-17	1	2.22324	-1.80506	4.0283	-1.23167	-1.17671	0.272944	0.00124697	0.0186205	0.213803
CG17572	trough	24	12	12	-3.50877e-08	1	1.63889	-2.91491	4.5538	-0.562244	-1.3376	0.273522	0.00124697	0.0186205	0.213803
l(1)G0469	trough	24	8	12	0.0302627	1.02241	1.80919	-3.35823	5.16742	-0.538734	-1.77815	0.27315	0.00124697	0.0186205	0.213803
RpS23	trough	24	4	12	-1.05263e-07	1	2.12007	-2.31838	4.43845	-0.914459	-0.952046	0.273689	0.00124697	0.0186205	0.213803
PyK	trough	24	0	20	7.01754e-08	1	3.34459	-2.08162	5.42621	-1.60673	-0.943196	0.272944	0.00124697	0.0186205	0.213803
CdsA	trough	24	8	4	-1.16866e-17	1	1.83447	-2.69781	4.53228	-0.679983	-0.951183	0.27315	0.00124697	0.0186205	0.213803
CG10479	trough	24	16	12	-1.75439e-08	1	2.58186	-2.79286	5.37472	-0.924449	-1.14761	0.273701	0.00124697	0.0186205	0.213803
CG5288	trough	24	8	12	7.01754e-08	1	1.80085	-2.09667	3.89751	-0.858908	-1.044	0.27315	0.00124697	0.0186205	0.213803
poly	trough	24	20	12	-3.50877e-08	1	2.20932	-1.95647	4.16579	-1.12923	-1.10774	0.272971	0.00124697	0.0186205	0.213803
Rac1	trough	24	8	20	-5.26316e-08	1	3.089	-1.97662	5.06562	-1.56277	-1.15633	0.27315	0.00124697	0.0186205	0.213803
CG15096	trough	24	20	12	-5.26316e-08	1	1.99601	-2.5703	4.56631	-0.776568	-1.4022	0.272971	0.00124697	0.0186205	0.213803
Ent2	trough	24	16	12	-5.26316e-08	1	2.70806	-2.74276	5.45082	-0.987349	-1.39124	0.273701	0.00124697	0.0186205	0.213803
CG5720	trough	24	20	4	-1.75439e-08	1	2.8476	-2.43533	5.28292	-1.16929	-1.18824	0.272241	0.00130729	0.0193305	0.216874
CG17931	trough	24	8	20	1.75439e-08	1	1.76993	-2.41971	4.18964	-0.731465	-1.63048	0.271867	0.00130729	0.0193305	0.216874
CG10362	trough	24	4	20	1.75439e-08	1	1.77098	-2.63292	4.4039	-0.672629	-1.11728	0.272404	0.00130729	0.0193305	0.216874
CG2291	trough	24	0	4	-0.0089208	0.955752	1.60353	-2.6219	4.22542	-0.61159	-1.15337	0.271657	0.00130729	0.0193305	0.216874
dgo	trough	24	20	4	-0.0207439	0.979237	1.56092	-3.29484	4.85577	-0.473747	-1.15569	0.272241	0.00130729	0.0193305	0.216874
CG13369	trough	24	12	12	-3.50877e-08	1	1.54249	-3.44439	4.98688	-0.447826	-1.69809	0.272241	0.00130729	0.0193305	0.216874
CG2975	trough	24	4	20	-0.06613	1.02743	2.51522	-2.70685	5.22207	-0.929205	-1.0656	0.272404	0.00130729	0.0193305	0.216874
rtv	trough	24	16	4	0.0996748	1.02677	2.17012	-2.3197	4.48982	-0.93552	-1.665	0.272419	0.00130729	0.0193305	0.216874
CG31100	trough	24	12	20	5.26316e-08	1	1.93125	-1.65381	3.58507	-1.16776	-0.924356	0.272241	0.00130729	0.0193305	0.216874
CG6206	trough	24	12	12	-5.26316e-08	1	1.94867	-2.68249	4.63115	-0.726441	-1.07287	0.272241	0.00130729	0.0193305	0.216874
CG31635	trough	24	4	4	-0.0309723	1.01793	1.88016	-2.07036	3.95052	-0.908134	-1.23669	0.272404	0.00130729	0.0193305	0.216874
CG15922	trough	24	0	4	-9.7388e-18	1	2.34845	-2.05567	4.40412	-1.14242	-1.3441	0.271657	0.00130729	0.0193305	0.216874
CG11655	trough	24	20	20	1.75439e-08	1	2.28462	-3.53841	5.82303	-0.645663	-1.40334	0.271689	0.00130729	0.0193305	0.216874
CG12512	trough	24	8	4	1.94776e-17	1	1.54993	-3.42349	4.97342	-0.452733	-0.943399	0.271867	0.00130729	0.0193305	0.216874
CG14962	trough	24	4	12	-1.75439e-08	1	2.20972	-3.00933	5.21905	-0.734289	-1.32566	0.272404	0.00130729	0.0193305	0.216874
CG5018	trough	24	4	4	0.00207938	0.88742	1.7429	-1.53931	3.28221	-1.13226	-1.00287	0.272404	0.00130729	0.0193305	0.216874
CG31344	trough	24	0	12	-3.50877e-08	1	2.52329	-2.0082	4.53149	-1.25649	-1.13713	0.271657	0.00130729	0.0193305	0.216874
mRpL39	trough	24	16	12	-5.26316e-08	1	1.67722	-3.42064	5.09787	-0.490324	-1.36146	0.272419	0.00130729	0.0193305	0.216874
CG3165	trough	24	0	12	5.26316e-08	1	1.97328	-2.84672	4.81999	-0.693178	-1.59758	0.271657	0.00130729	0.0193305	0.216874
CG16743	trough	24	0	12	-2.72686e-17	1	1.9922	-2.11736	4.10956	-0.940886	-0.866178	0.270369	0.00137025	0.0200605	0.219253
Nup58	trough	24	16	4	5.26316e-08	1	1.81411	-2.35598	4.17009	-0.770002	-1.49758	0.271137	0.00137025	0.0200605	0.219253
CG3457	trough	24	0	20	5.84328e-18	1	1.55019	-2.53967	4.08986	-0.610388	-1.51486	0.270369	0.00137025	0.0200605	0.219253
CG17370	trough	24	4	12	0.0769583	1.03812	2.392	-3.94382	6.33582	-0.606519	-1.22628	0.271119	0.00137025	0.0200605	0.219253
Nmda1	trough	24	12	12	1.75439e-08	1	2.73039	-1.88998	4.62036	-1.44467	-1.18196	0.27096	0.00137025	0.0200605	0.219253
CG12003	trough	24	0	4	-0.0158455	0.966686	2.5269	-2.21054	4.73744	-1.14311	-1.49802	0.270369	0.00137025	0.0200605	0.219253
CG14329	trough	24	0	12	3.50877e-08	1	1.8708	-2.51768	4.38848	-0.743063	-1.32897	0.270369	0.00137025	0.0200605	0.219253
Atg13	trough	24	16	4	-0.0612433	1.00109	1.27232	-3.48469	4.75701	-0.365118	-1.50338	0.271137	0.00137025	0.0200605	0.219253
CG13344	trough	24	12	20	-0.0442483	1.05348	1.5123	-3.06037	4.57266	-0.494156	-1.56372	0.27096	0.00137025	0.0200605	0.219253
CG2941	trough	24	4	20	-0.032035	1.00844	2.31282	-2.98761	5.30043	-0.774136	-1.12232	0.271119	0.00137025	0.0200605	0.219253
CG7033	trough	24	4	20	0.0264198	0.950697	2.07913	-2.26656	4.34569	-0.917305	-1.00235	0.271119	0.00137025	0.0200605	0.219253
CG7757	trough	24	16	4	5.84328e-18	1	1.7981	-2.07876	3.87686	-0.864989	-1.30567	0.271137	0.00137025	0.0200605	0.219253
CG5589	trough	24	16	12	-0.034931	0.918359	1.57644	-2.53286	4.10931	-0.622396	-1.59852	0.271137	0.00137025	0.0200605	0.219253
geminin	trough	24	0	20	0.0228162	0.978664	2.04508	-2.15226	4.19735	-0.950203	-1.29152	0.270369	0.00137025	0.0200605	0.219253
Cdc6	trough	24	4	4	0.00230345	0.991339	2.76702	-3.08792	5.85494	-0.896078	-1.72638	0.271119	0.00137025	0.0200605	0.219253
Ccp84Ag	trough	24	0	12	-0.0273641	1.02988	1.90013	-2.12849	4.02862	-0.892715	-1.1177	0.270369	0.00137025	0.0200605	0.219253
Stat92E	trough	24	8	20	3.50877e-08	1	2.39193	-2.22702	4.61896	-1.07405	-0.963788	0.270585	0.00137025	0.0200605	0.219253
Or35a	trough	24	4	4	1.75439e-08	1	1.73703	-3.26517	5.00221	-0.531989	-1.73752	0.271119	0.00137025	0.0200605	0.219253
Ir60a	trough	24	8	4	0.0531579	0.996428	2.21151	-3.3731	5.58461	-0.655633	-1.37224	0.270585	0.00137025	0.0200605	0.219253
Cda4	trough	24	4	20	-2.14558e-17	1	2.1284	-1.99198	4.12037	-1.06849	-1.22401	0.271119	0.00137025	0.0200605	0.219253
Drs	trough	24	16	12	-1.94776e-18	1	2.05794	-1.96498	4.02292	-1.04731	-1.17203	0.271137	0.00137025	0.0200605	0.219253
Sh	trough	24	0	12	1.75439e-08	1	1.58071	-3.29241	4.87312	-0.480108	-1.61833	0.270369	0.00137025	0.0200605	0.219253
mav	trough	24	0	12	0.0136382	0.99643	2.20654	-1.94546	4.152	-1.1342	-0.810667	0.269082	0.00143593	0.0209105	0.223045
CG3149	trough	24	12	12	5.84328e-18	1	1.90955	-3.09928	5.00882	-0.616126	-1.30892	0.269678	0.00143593	0.0209105	0.223045
CG1801	trough	24	8	12	0.0363811	1.01432	2.39346	-2.84766	5.24113	-0.840501	-1.58555	0.269302	0.00143593	0.0209105	0.223045
Mfap1	trough	24	0	20	0.083374	1.03196	2.5987	-2.60822	5.20692	-0.996349	-2.09478	0.269082	0.00143593	0.0209105	0.223045
CG13840	trough	24	4	12	-1.75439e-08	1	2.67202	-3.49877	6.17079	-0.763702	-0.820323	0.269834	0.00143593	0.0209105	0.223045
CG33330	trough	24	0	20	7.01754e-08	1	2.11892	-2.36149	4.4804	-0.897282	-1.09759	0.269082	0.00143593	0.0209105	0.223045
CG5155	trough	24	20	4	-0.00029983	0.982558	2.07188	-3.89697	5.96886	-0.531665	-2.64782	0.269678	0.00143593	0.0209105	0.223045
sv	trough	24	16	12	-1.75439e-08	1	1.55242	-2.62731	4.17973	-0.590876	-1.95525	0.269855	0.00143593	0.0209105	0.223045
Rph	trough	24	0	12	-0.00909997	1.00765	1.64355	-3.20153	4.84507	-0.513363	-1.75057	0.269082	0.00143593	0.0209105	0.223045
CG14010	trough	24	8	4	-0.0831416	0.943069	1.77254	-2.36075	4.13329	-0.750837	-0.687246	0.269302	0.00143593	0.0209105	0.223045
CG11951	trough	24	0	20	0.006937	0.992548	1.81434	-2.69067	4.50501	-0.67431	-1.26604	0.269082	0.00143593	0.0209105	0.223045
CG9989	trough	24	8	12	0.0428968	1.13699	2.45928	-3.42469	5.88397	-0.718105	-2.37911	0.269302	0.00143593	0.0209105	0.223045
CG13040	trough	24	20	4	0.00296208	0.999399	1.41681	-3.37149	4.7883	-0.420231	-2.69996	0.269678	0.00143593	0.0209105	0.223045
Rel	trough	24	20	4	3.50877e-08	1	2.07246	-3.14894	5.2214	-0.658144	-0.985354	0.269678	0.00143593	0.0209105	0.223045
CG4619	trough	24	16	20	0.00528937	0.987163	1.6367	-2.69692	4.33362	-0.606877	-1.38884	0.269855	0.00143593	0.0209105	0.223045
CG13127	trough	24	16	12	0.0157748	0.974858	1.92512	-2.68986	4.61497	-0.715695	-1.81084	0.269855	0.00143593	0.0209105	0.223045
CG14043	trough	24	0	12	-3.50877e-08	1	2.02172	-2.82433	4.84605	-0.715822	-0.964271	0.269082	0.00143593	0.0209105	0.223045
CG1840	trough	24	20	4	5.26316e-08	1	2.45789	-2.64092	5.09881	-0.930694	-0.994082	0.269678	0.00143593	0.0209105	0.223045
Pcaf	trough	24	8	20	-1.75439e-08	1	2.95881	-3.03038	5.9892	-0.976383	-1.06031	0.269302	0.00143593	0.0209105	0.223045
l(3)05822	trough	24	8	20	-5.26316e-08	1	2.3941	-2.15201	4.5461	-1.1125	-0.960543	0.269302	0.00143593	0.0209105	0.223045
Indy	trough	24	20	20	-3.50877e-08	1	1.80873	-2.5863	4.39504	-0.699352	-1.25172	0.269126	0.00143593	0.0209105	0.223045
CG12269	trough	24	0	12	-5.26316e-08	1	2.2287	-2.63758	4.86628	-0.84498	-1.02498	0.267794	0.00150445	0.0218305	0.227389
CG4036	trough	24	8	12	0.0124664	0.99557	1.89451	-2.78572	4.68023	-0.680079	-1.05269	0.26802	0.00150445	0.0218305	0.227389
CG7227	trough	24	16	4	-3.50877e-08	1	1.57098	-2.40989	3.98087	-0.651886	-2.43217	0.268573	0.00150445	0.0218305	0.227389
CG7675	trough	24	4	20	5.26316e-08	1	2.0636	-1.87381	3.93741	-1.10129	-1.16126	0.268549	0.00150445	0.0218305	0.227389
Rgl	trough	24	12	4	-0.0470563	0.977598	1.30127	-2.57665	3.87792	-0.505022	-0.980894	0.268397	0.00150445	0.0218305	0.227389
sr	trough	24	8	12	0.0181413	0.983087	2.05574	-1.91822	3.97395	-1.07169	-1.26066	0.26802	0.00150445	0.0218305	0.227389
Trxr-1	trough	24	4	20	-1.75439e-08	1	3.61708	-2.04351	5.6606	-1.77003	-0.825483	0.268549	0.00150445	0.0218305	0.227389
cype	trough	24	0	20	3.50877e-08	1	2.03282	-2.21406	4.24688	-0.918143	-0.811092	0.267794	0.00150445	0.0218305	0.227389
Dgkepsilon	trough	24	4	20	1.75439e-08	1	3.38945	-2.22688	5.61633	-1.52207	-0.814212	0.268549	0.00150445	0.0218305	0.227389
CG5707	trough	24	0	20	0.00511599	0.991928	1.87343	-3.93374	5.80717	-0.476248	-2.13503	0.267794	0.00150445	0.0218305	0.227389
CD98hc	trough	24	4	20	3.50877e-08	1	2.01276	-2.73245	4.74521	-0.736611	-0.967204	0.268549	0.00150445	0.0218305	0.227389
Dsk	trough	24	4	20	5.26316e-08	1	2.23211	-2.69483	4.92694	-0.828294	-0.960854	0.268549	0.00150445	0.0218305	0.227389
Krn	trough	24	0	20	-0.00561349	0.992079	2.36587	-3.03462	5.40049	-0.779626	-1.39943	0.267794	0.00150445	0.0218305	0.227389
Est-6	trough	24	0	4	0	1	2.4685	-2.23651	4.70501	-1.10372	-1.14929	0.267794	0.00150445	0.0218305	0.227389
Moe	trough	24	16	12	-3.50877e-08	1	3.56694	-2.01952	5.58646	-1.76624	-0.888705	0.268573	0.00150445	0.0218305	0.227389
JIL-1	trough	24	16	12	-3.50877e-08	1	1.85808	-1.90809	3.76617	-0.973794	-1.0329	0.268573	0.00150445	0.0218305	0.227389
CG13018	trough	24	20	12	-0.0201502	0.987655	1.68869	-2.50896	4.19766	-0.673065	-0.840978	0.267844	0.00150445	0.0218305	0.227389
cdc14	trough	24	4	20	-0.000644985	0.927098	2.03056	-3.38376	5.41433	-0.600091	-1.11646	0.268549	0.00150445	0.0218305	0.227389
CG9715	trough	24	16	20	-5.26316e-08	1	1.91384	-3.23136	5.14521	-0.592271	-1.27262	0.268573	0.00150445	0.0218305	0.227389
CG33307	trough	24	20	4	-3.50877e-08	1	2.08488	-2.38976	4.47463	-0.872423	-1.30976	0.268397	0.00150445	0.0218305	0.227389
Ance-5	trough	24	16	20	5.26316e-08	1	2.28016	-2.92976	5.20992	-0.778277	-1.43162	0.268573	0.00150445	0.0218305	0.227389
Spargel	trough	24	4	12	-3.50877e-08	1	2.53087	-2.22267	4.75354	-1.13867	-1.06854	0.267264	0.0015759	0.0228205	0.234294
CG12699	trough	24	16	12	0.0888815	0.994203	2.32469	-2.47545	4.80014	-0.939101	-1.82407	0.267291	0.0015759	0.0228205	0.234294
CG15544	trough	24	12	20	-1.75439e-08	1	1.83704	-3.71179	5.54883	-0.494919	-2.99568	0.267116	0.0015759	0.0228205	0.234294
Fatp	trough	24	12	12	-3.50877e-08	1	2.38171	-2.21676	4.59847	-1.07441	-1.24259	0.267116	0.0015759	0.0228205	0.234294
Bsg25A	trough	24	0	20	-0.0569522	1.01663	1.43916	-3.61922	5.05838	-0.397642	-1.82744	0.266507	0.0015759	0.0228205	0.234294
CG33214	trough	24	12	4	0.219299	0.991133	2.12885	-2.96358	5.09243	-0.718339	-2.58998	0.267116	0.0015759	0.0228205	0.234294
Rpn1	trough	24	4	20	-7.01754e-08	1	1.96581	-2.77177	4.73758	-0.709227	-1.56829	0.267264	0.0015759	0.0228205	0.234294
Tango9	trough	24	4	20	-1.75439e-08	1	3.15304	-2.32797	5.48101	-1.35442	-0.875469	0.267264	0.0015759	0.0228205	0.234294
olf186-F	trough	24	20	4	7.01754e-08	1	2.76293	-2.43371	5.19663	-1.13527	-0.983857	0.267116	0.0015759	0.0228205	0.234294
Adh	trough	24	4	12	0.0298288	0.996838	2.68331	-2.02525	4.70856	-1.32492	-1.2399	0.267264	0.0015759	0.0228205	0.234294
CG6967	trough	24	20	12	0.0239605	0.990812	1.61126	-2.70126	4.31253	-0.596486	-1.33711	0.266563	0.0015759	0.0228205	0.234294
CG14722	trough	24	16	20	3.50877e-08	1	1.80462	-3.48135	5.28597	-0.518367	-1.44724	0.267291	0.0015759	0.0228205	0.234294
CHKov2	trough	24	20	12	0.00264874	0.956919	1.84121	-3.00165	4.84287	-0.613399	-1.3032	0.266563	0.0015759	0.0228205	0.234294
Rpt4	trough	24	4	20	-3.50877e-08	1	2.05764	-1.77865	3.83629	-1.15686	-1.12942	0.265979	0.00165041	0.0238705	0.238756
CG1537	trough	24	8	20	3.89552e-18	1	2.12444	-2.89304	5.01748	-0.73433	-1.16818	0.265455	0.00165041	0.0238705	0.238756
tadr	trough	24	16	20	1.75439e-08	1	2.31469	-2.72763	5.04232	-0.848606	-0.964548	0.266009	0.00165041	0.0238705	0.238756
CG6498	trough	24	4	20	1.75439e-08	1	1.98976	-2.40155	4.39131	-0.82853	-1.24013	0.265979	0.00165041	0.0238705	0.238756
usp	trough	24	12	12	0.00805132	1.02796	1.93095	-3.26172	5.19267	-0.592005	-1.78998	0.265835	0.00165041	0.0238705	0.238756
CG4769	trough	24	0	4	-1.75439e-08	1	2.24219	-2.19968	4.44187	-1.01932	-1.26636	0.265219	0.00165041	0.0238705	0.238756
CG6686	trough	24	20	4	1.75439e-08	1	2.06985	-2.38183	4.45167	-0.869017	-1.47483	0.265835	0.00165041	0.0238705	0.238756
GalNAc-T2	trough	24	12	12	-0.0761047	1.04363	1.9822	-2.68151	4.6637	-0.73921	-0.971993	0.265835	0.00165041	0.0238705	0.238756
CG11242	trough	24	4	20	-1.75439e-08	1	2.00116	-2.60443	4.60559	-0.768366	-1.23037	0.265979	0.00165041	0.0238705	0.238756
Arf84F	trough	24	4	20	-0.01531	0.997789	1.89142	-2.02808	3.9195	-0.932616	-1.08464	0.265979	0.00165041	0.0238705	0.238756
CG33110	trough	24	8	12	-1.75439e-08	1	1.53777	-2.18617	3.72394	-0.703409	-1.37011	0.265455	0.00165041	0.0238705	0.238756
CG12014	trough	24	20	4	-1.75439e-08	1	2.30864	-1.95824	4.26689	-1.17894	-1.30618	0.265835	0.00165041	0.0238705	0.238756
CG34450	trough	24	8	20	-0.0531254	0.994237	1.76272	-3.02581	4.78852	-0.582561	-1.18926	0.265455	0.00165041	0.0238705	0.238756
Aats-trp	trough	24	12	12	1.75439e-08	1	1.89337	-3.07792	4.97129	-0.615147	-1.61492	0.265835	0.00165041	0.0238705	0.238756
sev	trough	24	0	20	0.0455036	0.982127	1.75871	-2.8461	4.60481	-0.617936	-1.66395	0.265219	0.00165041	0.0238705	0.238756
CG8613	trough	24	16	20	1.16866e-17	1	1.55983	-2.69956	4.25939	-0.57781	-0.9859	0.266009	0.00165041	0.0238705	0.238756
SmD3	trough	24	12	20	-1.16866e-17	1	1.84013	-2.6157	4.45583	-0.703492	-1.41933	0.265835	0.00165041	0.0238705	0.238756
yuri	trough	24	16	12	-1.75439e-08	1	1.80522	-2.63805	4.44326	-0.6843	-1.05022	0.266009	0.00165041	0.0238705	0.238756
CG3223	trough	24	4	4	-0.0243998	1.00272	2.38938	-2.10139	4.49077	-1.13705	-1.20444	0.265979	0.00165041	0.0238705	0.238756
cato	trough	24	20	4	-3.50877e-08	1	2.17073	-2.6141	4.78483	-0.830389	-1.89519	0.265835	0.00165041	0.0238705	0.238756
Gr59c	trough	24	0	4	-0.0264886	0.973742	2.17852	-3.97453	6.15304	-0.54812	-1.28492	0.265219	0.00165041	0.0238705	0.238756
l(2)gl	trough	24	20	4	-1.75439e-08	1	2.14565	-2.90256	5.04821	-0.739228	-1.75513	0.265835	0.00165041	0.0238705	0.238756
CG15027	trough	24	20	12	-0.0565079	1.07037	1.96807	-2.63228	4.60035	-0.747667	-0.815314	0.265281	0.00165041	0.0238705	0.238756
fbl6	trough	24	16	12	2.92164e-17	1	2.50393	-1.95437	4.4583	-1.2812	-0.933461	0.266009	0.00165041	0.0238705	0.238756
Spn77Bb	trough	24	0	4	0.0163691	0.976313	1.62152	-2.79991	4.42144	-0.579133	-1.39919	0.263932	0.00172808	0.0245705	0.238831
CG16718	trough	24	12	12	-1.75439e-08	1	2.03719	-2.50998	4.54717	-0.811633	-1.48736	0.264554	0.00172808	0.0245705	0.238831
CG4774	trough	24	20	12	1.75439e-08	1	2.61712	-2.41916	5.03628	-1.08183	-1.47311	0.264	0.00172808	0.0245705	0.238831
CG6689	trough	24	16	12	-2.09384e-17	1	2.72126	-2.19295	4.91421	-1.24092	-1.79673	0.264727	0.00172808	0.0245705	0.238831
CG14222	trough	24	16	20	3.50877e-08	1	1.66323	-3.11869	4.78192	-0.533309	-1.43154	0.264727	0.00172808	0.0245705	0.238831
CG10591	trough	24	4	20	-3.50877e-08	1	1.70812	-3.15875	4.86687	-0.540758	-1.36468	0.264694	0.00172808	0.0245705	0.238831
Faf	trough	24	8	12	3.50877e-08	1	2.48997	-2.5545	5.04448	-0.974737	-0.918435	0.264173	0.00172808	0.0245705	0.238831
Ssl1	trough	24	8	20	2.72686e-17	1	1.7165	-2.01676	3.73327	-0.851117	-1.41333	0.264173	0.00172808	0.0245705	0.238831
Tom34	trough	24	12	12	0.0052104	0.984384	1.98207	-3.02537	5.00744	-0.65515	-1.0938	0.264554	0.00172808	0.0245705	0.238831
Jafrac1	trough	24	4	20	-1.75439e-08	1	2.24514	-2.20297	4.44811	-1.01914	-1.22905	0.264694	0.00172808	0.0245705	0.238831
CG5337	trough	24	16	4	5.26316e-08	1	2.20977	-2.83442	5.04419	-0.779618	-1.43279	0.264727	0.00172808	0.0245705	0.238831
CG14220	trough	24	8	12	5.26316e-08	1	1.80824	-3.04034	4.84858	-0.59475	-2.77287	0.264173	0.00172808	0.0245705	0.238831
ric8a	trough	24	0	20	-0.0364359	1.02801	2.0987	-2.87925	4.97795	-0.728906	-0.991345	0.263932	0.00172808	0.0245705	0.238831
CG13895	trough	24	4	12	-0.0191242	0.955221	1.43055	-2.72132	4.15187	-0.525683	-1.3664	0.264694	0.00172808	0.0245705	0.238831
CG9836	trough	24	8	20	-3.50877e-08	1	1.652	-2.08086	3.73286	-0.793902	-1.10354	0.264173	0.00172808	0.0245705	0.238831
hk	trough	24	20	4	-5.26316e-08	1	1.40573	-3.04637	4.4521	-0.461444	-1.713	0.264554	0.00172808	0.0245705	0.238831
CG2972	trough	24	4	4	-7.01754e-08	1	1.83634	-2.46412	4.30046	-0.745235	-1.18648	0.264694	0.00172808	0.0245705	0.238831
CG5463	trough	24	20	20	0.0426287	0.994707	1.99465	-3.16042	5.15507	-0.631133	-1.32435	0.264	0.00172808	0.0245705	0.238831
ran-like	trough	24	0	4	-0.0125785	0.923041	2.39224	-2.33107	4.72331	-1.02624	-0.972208	0.263932	0.00172808	0.0245705	0.238831
mge	trough	24	0	4	-1.75439e-08	1	2.02458	-1.55291	3.57749	-1.30373	-1.08984	0.263932	0.00172808	0.0245705	0.238831
Tsp33B	trough	24	12	20	0.0094949	0.968218	1.79592	-3.75827	5.55419	-0.477859	-1.02607	0.264554	0.00172808	0.0245705	0.238831
CG11019	trough	24	16	20	0.00341559	0.968515	1.99296	-2.85871	4.85168	-0.697154	-1.04768	0.264727	0.00172808	0.0245705	0.238831
CG6808	trough	24	8	20	0.0256927	0.997059	2.38124	-2.26117	4.64241	-1.0531	-1.37393	0.264173	0.00172808	0.0245705	0.238831
Obp18a	trough	24	20	12	-3.50877e-08	1	2.14445	-2.2234	4.36785	-0.964493	-0.9415	0.264	0.00172808	0.0245705	0.238831
Dek	trough	24	12	12	1.75439e-08	1	1.94987	-2.53522	4.48509	-0.769116	-1.28947	0.264554	0.00172808	0.0245705	0.238831
Gp150	trough	24	16	20	-1.16866e-17	1	1.82885	-2.64594	4.47479	-0.691191	-0.887537	0.264727	0.00172808	0.0245705	0.238831
CG14935	trough	24	16	20	-1.75439e-08	1	2.43364	-3.27289	5.70652	-0.743574	-1.1186	0.264727	0.00172808	0.0245705	0.238831
Syx6	trough	24	20	4	-3.50877e-08	1	1.9894	-2.05427	4.04368	-0.968421	-1.00535	0.263273	0.00180902	0.0256105	0.2436
Klp98A	trough	24	4	4	-0.00278898	0.96502	1.75219	-2.46029	4.21247	-0.712189	-1.42526	0.26341	0.00180902	0.0256105	0.2436
Fas2	trough	24	16	20	-0.0149325	1.08265	1.81732	-3.79808	5.6154	-0.478484	-1.78385	0.263445	0.00180902	0.0256105	0.2436
nmo	trough	24	16	4	0.00073503	0.991205	1.90901	-2.4747	4.38371	-0.771412	-1.26644	0.263445	0.00180902	0.0256105	0.2436
CG3038	trough	24	16	12	-3.50877e-08	1	1.67749	-2.35217	4.02966	-0.713167	-1.21086	0.263445	0.00180902	0.0256105	0.2436
CG2263	trough	24	4	12	5.26316e-08	1	2.39297	-2.84172	5.2347	-0.842085	-1.42078	0.26341	0.00180902	0.0256105	0.2436
CG8525	trough	24	12	12	-8.77193e-08	1	2.35752	-2.19848	4.55601	-1.07234	-0.709209	0.263273	0.00180902	0.0256105	0.2436
Prat2	trough	24	4	20	-0.0323641	0.991077	1.63217	-2.72134	4.3535	-0.599766	-1.14169	0.26341	0.00180902	0.0256105	0.2436
Dak1	trough	24	8	12	-7.01754e-08	1	2.42016	-2.70669	5.12685	-0.89414	-1.47607	0.262891	0.00180902	0.0256105	0.2436
rut	trough	24	12	4	0.00874013	1.00048	1.48312	-2.87677	4.35989	-0.51555	-1.79964	0.263273	0.00180902	0.0256105	0.2436
CG42497	trough	24	20	12	3.50877e-08	1	2.33698	-2.10729	4.44427	-1.109	-0.91836	0.262718	0.00180902	0.0256105	0.2436
Aly	trough	24	12	12	-8.77193e-08	1	3.76213	-1.78393	5.54606	-2.10891	-0.668158	0.263273	0.00180902	0.0256105	0.2436
oc	trough	24	12	12	-0.012116	0.959213	2.16829	-3.6741	5.84239	-0.590154	-0.892151	0.263273	0.00180902	0.0256105	0.2436
CG10032	trough	24	4	4	3.50877e-08	1	2.4435	-2.08443	4.52793	-1.17226	-0.892054	0.26341	0.00180902	0.0256105	0.2436
yellow-d	trough	24	16	20	-1.75439e-08	1	1.99249	-2.11798	4.11047	-0.940752	-1.77349	0.263445	0.00180902	0.0256105	0.2436
brn	trough	24	8	12	0.138395	0.948685	1.89679	-2.26795	4.16474	-0.836346	-1.81085	0.262891	0.00180902	0.0256105	0.2436
CG8611	trough	24	0	4	0.139389	1.01937	1.91405	-2.35239	4.26644	-0.813665	-15.6952	0.262644	0.00180902	0.0256105	0.2436
or	trough	24	16	20	-3.50877e-08	1	1.63991	-3.91209	5.552	-0.419191	-1.88097	0.263445	0.00180902	0.0256105	0.2436
Flo	trough	24	4	20	9.7388e-18	1	2.20151	-2.08515	4.28666	-1.0558	-1.20598	0.26341	0.00180902	0.0256105	0.2436
CG4957	trough	24	16	20	-5.26316e-08	1	2.58346	-2.13419	4.71765	-1.21051	-1.44315	0.263445	0.00180902	0.0256105	0.2436
bowl	trough	24	8	20	-1.75439e-08	1	2.12267	-2.25317	4.37584	-0.942083	-1.35247	0.262891	0.00180902	0.0256105	0.2436
CG16710	trough	24	0	20	-0.0106003	1.0061	1.75124	-2.84932	4.60056	-0.614618	-1.28043	0.261357	0.00189337	0.0270305	0.251205
CG11791	trough	24	4	20	3.50877e-08	1	2.06052	-2.84662	4.90715	-0.723849	-1.2188	0.262125	0.00189337	0.0270305	0.251205
Xbp1	trough	24	8	12	2.19123e-18	1	2.15142	-1.96569	4.1171	-1.09449	-0.947744	0.261608	0.00189337	0.0270305	0.251205
boss	trough	24	4	12	1.05263e-07	1	1.99076	-2.85736	4.84812	-0.696715	-1.08773	0.262125	0.00189337	0.0270305	0.251205
CG11368	trough	24	4	12	-5.26316e-08	1	2.07476	-2.33996	4.41472	-0.886666	-0.861704	0.262125	0.00189337	0.0270305	0.251205
CG8771	trough	24	8	12	1.75439e-08	1	1.99137	-2.6212	4.61256	-0.759716	-1.02104	0.261608	0.00189337	0.0270305	0.251205
TepI	trough	24	0	20	-0.111953	0.963124	2.07897	-2.21399	4.29296	-0.939016	-1.01642	0.261357	0.00189337	0.0270305	0.251205
fru	trough	24	16	20	1.75439e-08	1	2.30912	-2.1917	4.50083	-1.05357	-1.10598	0.262163	0.00189337	0.0270305	0.251205
TfIIA-L	trough	24	16	4	-3.50877e-08	1	2.02188	-2.68986	4.71174	-0.751669	-1.17669	0.262163	0.00189337	0.0270305	0.251205
CG9791	trough	24	16	4	0.0230967	1.00431	1.818	-2.52489	4.34289	-0.720033	-1.40653	0.262163	0.00189337	0.0270305	0.251205
CG1239	trough	24	16	12	-0.0874227	1.04149	1.77263	-2.66956	4.44219	-0.664016	-0.913271	0.262163	0.00189337	0.0270305	0.251205
CG8531	trough	24	16	12	3.50877e-08	1	2.32719	-2.63553	4.96272	-0.883005	-0.861574	0.262163	0.00189337	0.0270305	0.251205
CG13117	trough	24	12	12	3.89552e-18	1	2.01947	-2.66633	4.6858	-0.757396	-1.26247	0.261992	0.00189337	0.0270305	0.251205
CG14752	trough	24	4	12	3.50877e-08	1	2.29768	-2.80534	5.10302	-0.819041	-0.941	0.262125	0.00189337	0.0270305	0.251205
CG16813	trough	24	0	12	-5.26316e-08	1	2.03779	-2.13393	4.17171	-0.954946	-1.17247	0.261357	0.00189337	0.0270305	0.251205
CG14095	trough	24	16	12	0.00551592	0.940183	1.26965	-2.47427	3.74392	-0.513144	-0.948709	0.262163	0.00189337	0.0270305	0.251205
CG14185	trough	24	0	4	-0.00239629	1.06253	2.06794	-2.54121	4.60915	-0.813764	-0.947562	0.261357	0.00189337	0.0270305	0.251205
CG14072	trough	24	16	20	0.0288408	0.985432	1.16726	-3.13554	4.30279	-0.372268	-4.91895	0.262163	0.00189337	0.0270305	0.251205
Cdk8	trough	24	20	12	-0.0205472	0.938015	2.01335	-2.18078	4.19413	-0.923222	-1.10997	0.261437	0.00189337	0.0270305	0.251205
CG3714	trough	24	4	12	0.0239665	1.00728	1.78377	-2.1836	3.96737	-0.816897	-1.1253	0.262125	0.00189337	0.0270305	0.251205
Dsor1	trough	24	4	12	-5.26316e-08	1	1.47432	-3.24355	4.71787	-0.454539	-1.49179	0.262125	0.00189337	0.0270305	0.251205
bor	trough	24	16	12	3.50877e-08	1	1.94608	-2.02254	3.96862	-0.962193	-1.11752	0.262163	0.00189337	0.0270305	0.251205
CG1908	trough	24	12	12	0.0364262	1.02799	2.07629	-2.33584	4.41213	-0.888885	-1.59181	0.261992	0.00189337	0.0270305	0.251205
TBPH	trough	24	20	12	2.72686e-17	1	1.79176	-2.53931	4.33107	-0.705611	-1.08723	0.260155	0.00198123	0.0282405	0.256311
Act57B	trough	24	8	4	5.26316e-08	1	1.97819	-2.34271	4.3209	-0.844404	-0.931775	0.260326	0.00198123	0.0282405	0.256311
CG10916	trough	24	12	4	5.26316e-08	1	1.94378	-2.57755	4.52132	-0.754119	-1.07979	0.26071	0.00198123	0.0282405	0.256311
Oda	trough	24	8	12	-7.01754e-08	1	2.10099	-2.97447	5.07546	-0.706341	-1.2909	0.260326	0.00198123	0.0282405	0.256311
Irk2	trough	24	20	4	-5.26316e-08	1	1.66415	-2.82987	4.49402	-0.588066	-1.14293	0.26071	0.00198123	0.0282405	0.256311
CG13116	trough	24	12	4	0.0160694	0.988028	1.60712	-2.68539	4.29251	-0.598467	-1.20367	0.26071	0.00198123	0.0282405	0.256311
CG3906	trough	24	16	12	-0.0905865	1.00658	1.7051	-2.69629	4.40139	-0.632386	-0.718455	0.260881	0.00198123	0.0282405	0.256311
EcR	trough	24	0	20	0.0306945	1.01515	1.76069	-3.59413	5.35482	-0.489881	-2.7299	0.260069	0.00198123	0.0282405	0.256311
CG1275	trough	24	4	20	-7.01754e-08	1	1.7445	-2.20701	3.9515	-0.790437	-0.907769	0.26084	0.00198123	0.0282405	0.256311
CG6843	trough	24	12	12	0.140181	1.11256	2.66623	-2.83324	5.49947	-0.941052	-1.79964	0.26071	0.00198123	0.0282405	0.256311
CG1969	trough	24	8	12	-0.0571218	0.95709	1.53462	-3.14168	4.6763	-0.488472	-1.43341	0.260326	0.00198123	0.0282405	0.256311
CG8315	trough	24	4	4	3.50877e-08	1	1.82417	-2.0941	3.91827	-0.8711	-1.35614	0.26084	0.00198123	0.0282405	0.256311
Frq1	trough	24	16	20	0.0822565	1.05299	2.78136	-2.45472	5.23608	-1.13307	-1.40507	0.260881	0.00198123	0.0282405	0.256311
CG10592	trough	24	0	4	0.00676325	0.947293	1.7029	-2.12354	3.82644	-0.801913	-0.965129	0.260069	0.00198123	0.0282405	0.256311
CG11192	trough	24	16	4	1.94776e-17	1	1.69031	-2.54413	4.23445	-0.664397	-1.14546	0.260881	0.00198123	0.0282405	0.256311
CG7028	trough	24	12	12	1.75439e-08	1	2.3563	-2.81781	5.1741	-0.836217	-1.23501	0.26071	0.00198123	0.0282405	0.256311
sowah	trough	24	8	12	-1.75439e-08	1	2.3176	-2.98202	5.29962	-0.777191	-1.03351	0.260326	0.00198123	0.0282405	0.256311
bgm	trough	24	0	20	-1.94776e-18	1	2.33804	-2.774	5.11204	-0.84284	-0.945325	0.260069	0.00198123	0.0282405	0.256311
eRF1	trough	24	8	20	-3.50877e-08	1	2.31641	-2.57673	4.89313	-0.898972	-1.09982	0.260326	0.00198123	0.0282405	0.256311
CG11652	trough	24	0	12	-3.50877e-08	1	1.6355	-2.97519	4.61069	-0.549711	-1.38366	0.260069	0.00198123	0.0282405	0.256311
Cyp6a9	trough	24	16	20	-5.26316e-08	1	1.91621	-2.09904	4.01525	-0.912899	-1.20053	0.260881	0.00198123	0.0282405	0.256311
Tim9a	trough	24	0	4	-3.50877e-08	1	2.06588	-2.80961	4.87549	-0.735291	-0.977738	0.260069	0.00198123	0.0282405	0.256311
Acp95EF	trough	24	0	4	0.0528922	1.09043	2.98938	-2.48432	5.4737	-1.2033	-0.861931	0.260069	0.00198123	0.0282405	0.256311
Adk2	trough	24	4	20	7.42583e-18	1	1.8022	-2.38475	4.18695	-0.755717	-1.43314	0.26084	0.00198123	0.0282405	0.256311
SP2637	trough	24	8	12	0.0238727	1.0107	1.89301	-3.34842	5.24144	-0.565345	-3.64737	0.259043	0.00207275	0.0295405	0.264756
Fbw5	trough	24	16	4	-5.26316e-08	1	2.72918	-2.2018	4.93098	-1.23953	-1.11349	0.259599	0.00207275	0.0295405	0.264756
CG7148	trough	24	4	4	1.75439e-08	1	2.84728	-3.63716	6.48444	-0.782831	-1.39426	0.259555	0.00207275	0.0295405	0.264756
CG31917	trough	24	8	12	1.75439e-08	1	1.2883	-2.9909	4.2792	-0.430741	-1.09805	0.259043	0.00207275	0.0295405	0.264756
CG15435	trough	24	8	4	-0.137526	1.0554	1.63971	-2.68587	4.32558	-0.610497	-0.950813	0.259043	0.00207275	0.0295405	0.264756
l(2)k05819	trough	24	12	12	-4.8694e-19	1	2.37124	-2.33784	4.70908	-1.01429	-1.08097	0.259429	0.00207275	0.0295405	0.264756
Arr1	trough	24	4	20	-1.75439e-08	1	1.74723	-2.36054	4.10777	-0.740182	-0.928689	0.259555	0.00207275	0.0295405	0.264756
CG17612	trough	24	8	12	0.0121735	0.993952	1.54579	-3.34911	4.8949	-0.461553	-1.11722	0.259043	0.00207275	0.0295405	0.264756
CG7889	trough	24	12	12	1.94776e-18	1	1.95449	-2.34185	4.29634	-0.834595	-1.30075	0.259429	0.00207275	0.0295405	0.264756
elm	trough	24	16	20	-3.50877e-08	1	2.25323	-2.13118	4.38441	-1.05727	-1.13538	0.259599	0.00207275	0.0295405	0.264756
CG12333	trough	24	16	20	-1.75439e-08	1	2.48269	-1.78581	4.26851	-1.39023	-1.41014	0.259599	0.00207275	0.0295405	0.264756
Spn47C	trough	24	20	4	2.53209e-17	1	1.88498	-2.15352	4.03849	-0.875302	-1.44103	0.259429	0.00207275	0.0295405	0.264756
CG42240	trough	24	16	12	1.75439e-08	1	2.71121	-2.30833	5.01954	-1.17453	-1.04681	0.259599	0.00207275	0.0295405	0.264756
loj	trough	24	8	12	3.50877e-08	1	2.6796	-1.69485	4.37445	-1.58103	-0.844034	0.257761	0.00216805	0.0305505	0.267626
CG6749	trough	24	12	4	0.0699829	1.04978	2.25821	-3.75468	6.01289	-0.601438	-1.3494	0.258148	0.00216805	0.0305505	0.267626
CG10853	trough	24	4	4	-0.0688237	1.01302	1.57231	-2.92499	4.49729	-0.537542	-1.28669	0.25827	0.00216805	0.0305505	0.267626
cals	trough	24	20	4	-1.55821e-17	1	1.59493	-2.6231	4.21802	-0.608033	-1.21922	0.258148	0.00216805	0.0305505	0.267626
CG9759	trough	24	20	4	3.50877e-08	1	2.35052	-1.94747	4.29799	-1.20696	-1.08137	0.258148	0.00216805	0.0305505	0.267626
CG8399	trough	24	20	4	1.75439e-08	1	2.01048	-2.03218	4.04266	-0.989324	-0.912571	0.258148	0.00216805	0.0305505	0.267626
CG6191	trough	24	4	20	-1.75439e-08	1	2.34674	-1.70214	4.04888	-1.3787	-1.07124	0.25827	0.00216805	0.0305505	0.267626
CG7967	trough	24	4	20	-5.26316e-08	1	2.11214	-2.32732	4.43946	-0.907544	-0.988596	0.25827	0.00216805	0.0305505	0.267626
CG1041	trough	24	8	12	1.75439e-08	1	1.40402	-2.63127	4.03528	-0.533589	-1.2731	0.257761	0.00216805	0.0305505	0.267626
sol	trough	24	8	20	-3.50877e-08	1	1.74649	-2.58255	4.32904	-0.676264	-1.08985	0.257761	0.00216805	0.0305505	0.267626
Cpr64Ad	trough	24	16	4	3.50877e-08	1	2.18651	-2.16714	4.35365	-1.00894	-1.17356	0.258317	0.00216805	0.0305505	0.267626
CG1826	trough	24	12	12	0.0353954	0.97735	1.99028	-3.59147	5.58175	-0.55417	-1.20363	0.258148	0.00216805	0.0305505	0.267626
Hip14	trough	24	16	4	3.50877e-08	1	1.59553	-2.53986	4.1354	-0.628197	-1.45379	0.258317	0.00216805	0.0305505	0.267626
edl	trough	24	8	20	0.00392892	0.991625	1.62449	-3.71603	5.34052	-0.437158	-2.24102	0.257761	0.00216805	0.0305505	0.267626
CG5381	trough	24	20	4	0.00549995	0.992043	1.72692	-2.93237	4.65929	-0.588917	-1.40301	0.258148	0.00216805	0.0305505	0.267626
CG11413	trough	24	8	4	-0.0207587	1.00329	1.6177	-3.05686	4.67456	-0.529204	-1.31449	0.257761	0.00216805	0.0305505	0.267626
cpa	trough	24	4	12	-2.14254e-17	1	2.38921	-2.5619	4.95111	-0.932594	-1.17751	0.25827	0.00216805	0.0305505	0.267626
Ork1	trough	24	16	20	1.75439e-08	1	3.0428	-2.5543	5.5971	-1.19124	-1.27007	0.258317	0.00216805	0.0305505	0.267626
CG6379	trough	24	4	4	-0.0330221	0.904747	1.70402	-3.2719	4.97592	-0.520805	-1.21369	0.25827	0.00216805	0.0305505	0.267626
Prosalpha5	trough	24	12	4	5.26316e-08	1	1.8859	-3.61939	5.50529	-0.521056	-1.44974	0.258148	0.00216805	0.0305505	0.267626
Amph	trough	24	20	12	0.00625269	0.992293	1.89863	-2.65283	4.55146	-0.715698	-1.1366	0.257592	0.00216805	0.0305505	0.267626
CG2201	trough	24	20	4	1.75439e-08	1	2.28671	-2.31413	4.60084	-0.988153	-0.970533	0.258148	0.00216805	0.0305505	0.267626
cdi	trough	24	20	12	0.0101851	0.994115	1.68574	-2.32692	4.01266	-0.724453	-1.30352	0.257592	0.00216805	0.0305505	0.267626
eas	trough	24	20	4	3.50877e-08	1	2.19855	-2.61807	4.81663	-0.839761	-1.48617	0.258148	0.00216805	0.0305505	0.267626
CG1909	trough	24	20	4	3.50877e-08	1	2.06872	-2.71332	4.78204	-0.762433	-1.34263	0.256867	0.00226726	0.0317205	0.270248
Wnk	trough	24	4	20	3.50877e-08	1	2.07009	-2.94202	5.01211	-0.703632	-1.45871	0.256985	0.00226726	0.0317205	0.270248
RhoGEF3	trough	24	20	20	9.7388e-18	1	1.77028	-2.94096	4.71124	-0.601941	-1.25581	0.25631	0.00226726	0.0317205	0.270248
CG6908	trough	24	4	20	-5.26316e-08	1	1.62379	-3.13403	4.75782	-0.518117	-1.5714	0.256985	0.00226726	0.0317205	0.270248
CG31462	trough	24	8	4	-0.00518403	0.955772	1.65873	-3.48408	5.14281	-0.476087	-1.42832	0.256479	0.00226726	0.0317205	0.270248
Pcmt	trough	24	4	12	0.0623448	1.01851	2.28401	-2.51701	4.80102	-0.907428	-1.30504	0.256985	0.00226726	0.0317205	0.270248
CG1443	trough	24	4	12	1.75439e-08	1	2.18725	-3.21658	5.40383	-0.679992	-1.37449	0.256985	0.00226726	0.0317205	0.270248
Nplp2	trough	24	0	20	3.50877e-08	1	2.03615	-1.98403	4.02018	-1.02627	-1.08823	0.257494	0.00226726	0.0317205	0.270248
CG12708	trough	24	8	12	3.50877e-08	1	2.22761	-2.33662	4.56423	-0.953348	-1.07469	0.256479	0.00226726	0.0317205	0.270248
Ac78C	trough	24	8	20	-0.00677311	0.992484	1.83298	-2.04447	3.87745	-0.896557	-1.14725	0.256479	0.00226726	0.0317205	0.270248
CG1440	trough	24	4	20	-3.50877e-08	1	1.88105	-2.79061	4.67166	-0.674064	-1.56914	0.256985	0.00226726	0.0317205	0.270248
dbr	trough	24	16	12	2.72686e-17	1	1.77878	-3.07131	4.85008	-0.579159	-1.24695	0.257035	0.00226726	0.0317205	0.270248
stumps	trough	24	8	20	1.75439e-08	1	1.6076	-2.16174	3.76934	-0.743661	-1.76826	0.256479	0.00226726	0.0317205	0.270248
Pgam5	trough	24	12	4	1.75439e-08	1	1.69909	-2.58895	4.28804	-0.656284	-1.67176	0.256867	0.00226726	0.0317205	0.270248
alien	trough	24	0	4	-3.89552e-18	1	2.08905	-2.34901	4.43805	-0.889331	-1.64966	0.257494	0.00226726	0.0317205	0.270248
Cyp317a1	trough	24	4	12	-0.0651347	1.02391	2.1571	-2.50474	4.66184	-0.861206	-0.999057	0.256985	0.00226726	0.0317205	0.270248
Pros54	trough	24	12	12	8.77193e-08	1	2.12809	-2.34192	4.47001	-0.908694	-1.23802	0.256867	0.00226726	0.0317205	0.270248
CG8335	trough	24	16	4	0.152563	0.99322	2.31658	-2.17241	4.48898	-1.06636	-1.47111	0.257035	0.00226726	0.0317205	0.270248
beta'Cop	trough	24	16	4	3.89552e-18	1	1.68762	-2.59991	4.28752	-0.649106	-0.995587	0.257035	0.00226726	0.0317205	0.270248
CG31999	trough	24	4	12	1.33908e-17	1	1.69771	-3.48029	5.178	-0.487807	-1.50223	0.256985	0.00226726	0.0317205	0.270248
CG4073	trough	24	0	4	0.0224654	1.00535	1.34889	-2.84238	4.19127	-0.474564	-4.33386	0.257494	0.00226726	0.0317205	0.270248
CG12007	trough	24	16	12	3.50877e-08	1	1.92188	-2.8576	4.77947	-0.67255	-2.27636	0.257035	0.00226726	0.0317205	0.270248
CG42231	trough	24	4	20	3.50877e-08	1	2.25455	-2.24883	4.50338	-1.00254	-1.23651	0.256985	0.00226726	0.0317205	0.270248
trn	trough	24	4	20	1.75439e-08	1	1.95573	-2.40975	4.36547	-0.81159	-1.08884	0.256985	0.00226726	0.0317205	0.270248
CG17724	trough	24	4	20	-1.75439e-08	1	1.81855	-2.89629	4.71484	-0.627889	-2.05642	0.256985	0.00226726	0.0317205	0.270248
GstD10	trough	24	8	4	0.0401236	0.972083	1.55999	-2.60555	4.16554	-0.59872	-1.71157	0.256479	0.00226726	0.0317205	0.270248
CG16885	trough	24	4	12	-1.75439e-08	1	1.9226	-1.93587	3.85847	-0.993143	-1.09141	0.256985	0.00226726	0.0317205	0.270248
l(2)37Cc	trough	24	16	12	3.50877e-08	1	2.0092	-2.15462	4.16382	-0.932507	-0.98009	0.257035	0.00226726	0.0317205	0.270248
lt	trough	24	20	4	-5.84328e-18	1	2.26445	-2.64531	4.90976	-0.856026	-1.00358	0.256867	0.00226726	0.0317205	0.270248
l(2)37Cg	trough	24	0	12	9.7388e-19	1	1.95238	-2.384	4.33638	-0.818951	-0.952932	0.257494	0.00226726	0.0317205	0.270248
CG8916	trough	24	0	12	-7.01754e-08	1	1.9518	-2.14859	4.10038	-0.908411	-0.941372	0.256207	0.00237052	0.0329905	0.275522
CG9514	trough	24	8	4	-0.00283511	0.969507	1.73199	-2.56254	4.29453	-0.67589	-1.33634	0.255196	0.00237052	0.0329905	0.275522
CG4266	trough	24	12	12	7.01754e-08	1	3.0122	-2.45091	5.4631	-1.22901	-0.808918	0.255586	0.00237052	0.0329905	0.275522
Pkcdelta	trough	24	16	20	-7.01754e-08	1	2.20518	-2.66668	4.87186	-0.826939	-1.24278	0.255753	0.00237052	0.0329905	0.275522
SuUR	trough	24	16	20	0.0292935	1.05757	2.69798	-2.9091	5.60708	-0.92743	-0.99035	0.255753	0.00237052	0.0329905	0.275522
Rad51D	trough	24	16	4	0.0123582	0.96272	1.86694	-2.87561	4.74255	-0.649234	-1.7701	0.255753	0.00237052	0.0329905	0.275522
synaptogyrin	trough	24	4	12	-1.75439e-08	1	1.97203	-4.20561	6.17764	-0.468905	-1.71231	0.2557	0.00237052	0.0329905	0.275522
CG6719	trough	24	12	12	3.50877e-08	1	2.27826	-1.99055	4.26881	-1.14454	-1.32526	0.255586	0.00237052	0.0329905	0.275522
Ir92a	trough	24	12	4	-1.75439e-08	1	1.60297	-2.60869	4.21166	-0.614472	-1.03421	0.255586	0.00237052	0.0329905	0.275522
CG12017	trough	24	8	20	-0.00034773	0.991193	1.99912	-3.13004	5.12915	-0.638687	-1.38562	0.255196	0.00237052	0.0329905	0.275522
OstStt3	trough	24	12	4	1.75439e-08	1	1.97115	-1.9178	3.88896	-1.02782	-1.03176	0.255586	0.00237052	0.0329905	0.275522
CG17378	trough	24	4	4	1.75439e-08	1	1.64486	-2.53782	4.18268	-0.648138	-1.06618	0.2557	0.00237052	0.0329905	0.275522
CG10075	trough	24	20	4	-1.75439e-08	1	1.84216	-3.2103	5.05246	-0.573829	-1.46466	0.255586	0.00237052	0.0329905	0.275522
CG7120	trough	24	4	4	0.0177363	1.00035	1.63781	-3.88621	5.52402	-0.421442	-1.19989	0.2557	0.00237052	0.0329905	0.275522
Scsalpha	trough	24	20	20	5.26316e-08	1	2.03022	-2.40657	4.43678	-0.843614	-1.5695	0.255029	0.00237052	0.0329905	0.275522
CG7607	trough	24	8	20	3.50877e-08	1	2.12012	-2.23249	4.35261	-0.949663	-1.20255	0.255196	0.00237052	0.0329905	0.275522
gig	trough	24	16	20	-3.50877e-08	1	1.61505	-2.30246	3.91751	-0.701448	-1.1682	0.255753	0.00237052	0.0329905	0.275522
CG9673	trough	24	20	12	-0.0403766	1.07049	1.97351	-2.69245	4.66596	-0.73298	-1.29067	0.255029	0.00237052	0.0329905	0.275522
CG9536	trough	24	16	4	-5.26316e-08	1	3.61864	-1.70902	5.32766	-2.11738	-0.928096	0.255753	0.00237052	0.0329905	0.275522
Oatp26F	trough	24	20	20	0.0417075	1.02028	2.08563	-3.559	5.64464	-0.586017	-1.83547	0.255029	0.00237052	0.0329905	0.275522
Pect	trough	24	8	20	-3.50877e-08	1	1.85617	-2.24862	4.10479	-0.825474	-1.00862	0.255196	0.00237052	0.0329905	0.275522
CG18619	trough	24	20	4	-2.72686e-17	1	1.56267	-2.27442	3.83709	-0.687061	-0.971925	0.255586	0.00237052	0.0329905	0.275522
CG15043	trough	24	16	12	0.0741358	0.959212	1.78378	-2.47524	4.25902	-0.720648	-1.32121	0.254471	0.00247798	0.0342005	0.279609
CG9062	trough	24	0	4	-0.0132625	1.05575	1.83977	-2.17716	4.01692	-0.845031	-1.75046	0.254919	0.00247798	0.0342005	0.279609
CG7192	trough	24	8	20	3.50877e-08	1	1.4336	-2.53574	3.96934	-0.565359	-1.33221	0.253914	0.00247798	0.0342005	0.279609
blot	trough	24	12	12	-5.26316e-08	1	3.03658	-2.09664	5.13322	-1.44831	-1.00144	0.254305	0.00247798	0.0342005	0.279609
CG13678	trough	24	4	20	1.75439e-08	1	2.36294	-2.44505	4.80799	-0.966419	-1.06409	0.254415	0.00247798	0.0342005	0.279609
CG18507	trough	24	4	12	5.26316e-08	1	2.48711	-2.44156	4.92868	-1.01866	-1.06398	0.254415	0.00247798	0.0342005	0.279609
CG3509	trough	24	4	20	0.0315782	0.982838	2.16455	-2.4406	4.60515	-0.886894	-1.25532	0.254415	0.00247798	0.0342005	0.279609
Ranbp21	trough	24	0	20	1.75439e-08	1	1.67567	-3.24508	4.92075	-0.516374	-1.68763	0.254919	0.00247798	0.0342005	0.279609
CG2862	trough	24	12	4	1.75439e-08	1	2.42315	-2.4369	4.86005	-0.994357	-1.17144	0.254305	0.00247798	0.0342005	0.279609
CG33969	trough	24	16	20	0.0896556	1.0601	2.74818	-3.03087	5.77905	-0.906732	-1.58495	0.254471	0.00247798	0.0342005	0.279609
Cyt-b5	trough	24	12	4	4.28507e-17	1	2.27111	-2.65008	4.92119	-0.856999	-1.01724	0.254305	0.00247798	0.0342005	0.279609
sec71	trough	24	8	12	-9.25186e-18	1	1.91493	-2.42331	4.33824	-0.790216	-1.58408	0.253914	0.00247798	0.0342005	0.279609
Spp	trough	24	12	4	1.75439e-08	1	2.026	-2.61591	4.64191	-0.774492	-1.01862	0.254305	0.00247798	0.0342005	0.279609
CG4733	trough	24	8	20	0.0104105	0.992849	1.52333	-2.70004	4.22337	-0.564188	-1.12982	0.253914	0.00247798	0.0342005	0.279609
CG32238	trough	24	0	20	1.75439e-08	1	2.12077	-2.5635	4.68428	-0.827295	-1.44901	0.254919	0.00247798	0.0342005	0.279609
XNP	trough	24	12	4	1.75439e-08	1	2.15462	-2.30683	4.46145	-0.934013	-1.09852	0.254305	0.00247798	0.0342005	0.279609
CG5973	trough	24	16	12	8.77193e-08	1	2.25371	-2.72256	4.97627	-0.827789	-1.04313	0.254471	0.00247798	0.0342005	0.279609
cerv	trough	24	4	4	5.26316e-08	1	1.75746	-2.1743	3.93175	-0.808287	-1.63549	0.254415	0.00247798	0.0342005	0.279609
CG8908	trough	24	4	20	-0.0108404	0.986969	1.78258	-3.17801	4.96059	-0.560911	-1.15029	0.254415	0.00247798	0.0342005	0.279609
CG3523	trough	24	4	20	1.75439e-08	1	1.56928	-2.86349	4.43277	-0.54803	-1.09964	0.254415	0.00247798	0.0342005	0.279609
CG42575	trough	24	20	4	-3.50877e-08	1	1.65634	-2.21203	3.86837	-0.748788	-1.3647	0.254305	0.00247798	0.0342005	0.279609
CG7330	trough	24	12	20	-1.75439e-08	1	2.12469	-2.7928	4.91749	-0.760773	-0.778244	0.254305	0.00247798	0.0342005	0.279609
CG11660	trough	24	12	20	-1.55821e-17	1	2.01591	-2.06243	4.07834	-0.977445	-1.1225	0.254305	0.00247798	0.0342005	0.279609
CG12935	trough	24	16	20	1.75439e-08	1	2.01786	-2.60804	4.6259	-0.773709	-1.19099	0.254471	0.00247798	0.0342005	0.279609
CG8950	trough	24	4	12	-0.0142121	0.996879	1.48683	-2.87134	4.35817	-0.51782	-2.23858	0.25313	0.00258978	0.0354505	0.281668
CG10621	trough	24	8	20	-1.75439e-08	1	1.91484	-2.66954	4.58438	-0.717292	-1.47912	0.252631	0.00258978	0.0354505	0.281668
CLIP-190	trough	24	20	4	-1.75439e-08	1	1.78372	-2.84533	4.62905	-0.626895	-1.3348	0.253024	0.00258978	0.0354505	0.281668
CG13877	trough	24	4	12	6.81716e-18	1	2.45569	-2.36183	4.81752	-1.03974	-0.830449	0.25313	0.00258978	0.0354505	0.281668
CG32987	trough	24	12	12	0.0166798	0.973807	2.12146	-3.05023	5.17169	-0.695506	-1.21651	0.253024	0.00258978	0.0354505	0.281668
CG2082	trough	24	4	20	7.79104e-18	1	2.37905	-2.78976	5.16881	-0.852777	-1.08731	0.25313	0.00258978	0.0354505	0.281668
CG8009	trough	24	12	4	-1.75439e-08	1	1.73932	-2.91017	4.64949	-0.597669	-1.41445	0.253024	0.00258978	0.0354505	0.281668
CG6074	trough	24	12	12	5.26316e-08	1	2.45957	-3.01557	5.47513	-0.815623	-1.26592	0.253024	0.00258978	0.0354505	0.281668
CG31038	trough	24	0	12	-0.0169032	0.962355	1.91068	-3.44976	5.36044	-0.553861	-0.993786	0.253632	0.00258978	0.0354505	0.281668
Cys	trough	24	4	20	-3.50877e-08	1	1.70627	-3.04852	4.75479	-0.559705	-1.24258	0.25313	0.00258978	0.0354505	0.281668
CG14297	trough	24	0	4	0.0132531	1.07348	2.46914	-2.3284	4.79754	-1.06044	-1.11719	0.253632	0.00258978	0.0354505	0.281668
HERC2	trough	24	0	20	1.75439e-08	1	1.90577	-2.30793	4.2137	-0.82575	-1.17713	0.253632	0.00258978	0.0354505	0.281668
Arr2	trough	24	4	12	-5.84328e-18	1	1.90515	-1.9523	3.85745	-0.975845	-1.09924	0.25313	0.00258978	0.0354505	0.281668
CG7158	trough	24	12	20	3.50877e-08	1	2.49277	-3.40049	5.89326	-0.733064	-0.902214	0.253024	0.00258978	0.0354505	0.281668
CG8086	trough	24	4	4	0.186045	1.18562	3.19536	-3.13819	6.33354	-1.01822	-2.40393	0.25313	0.00258978	0.0354505	0.281668
CG13723	trough	24	0	4	-0.0832476	1.00497	1.96145	-2.39962	4.36107	-0.817403	-1.11569	0.253632	0.00258978	0.0354505	0.281668
CG11550	trough	24	4	20	7.01754e-08	1	1.49452	-2.85681	4.35133	-0.523143	-1.59712	0.25313	0.00258978	0.0354505	0.281668
CG12788	trough	24	20	4	-1.75439e-08	1	2.05765	-2.53522	4.59286	-0.811627	-1.08991	0.253024	0.00258978	0.0354505	0.281668
CG6660	trough	24	12	20	0.0124036	1.01836	1.73812	-2.53411	4.27222	-0.68589	-1.53707	0.253024	0.00258978	0.0354505	0.281668
CG8997	trough	24	0	4	0.0181464	1.00602	2.37038	-2.14472	4.5151	-1.10522	-0.834429	0.253632	0.00258978	0.0354505	0.281668
CG31550	trough	24	16	12	-3.31119e-17	1	2.21913	-1.97818	4.19731	-1.1218	-1.10988	0.25319	0.00258978	0.0354505	0.281668
corn	trough	24	20	4	-5.26316e-08	1	1.6167	-3.72932	5.34602	-0.433511	-1.88336	0.253024	0.00258978	0.0354505	0.281668
CG7979	trough	24	20	4	3.50877e-08	1	2.5942	-1.83789	4.43209	-1.4115	-0.954384	0.253024	0.00258978	0.0354505	0.281668
CG11241	trough	24	16	4	-0.0373094	0.980354	2.32068	-3.05043	5.37111	-0.760772	-1.25604	0.25319	0.00258978	0.0354505	0.281668
kat-60L1	trough	24	16	20	3.50877e-08	1	2.93625	-2.38855	5.3248	-1.2293	-0.845308	0.25319	0.00258978	0.0354505	0.281668
CG17341	trough	24	0	20	0.033518	0.964262	1.61805	-2.84182	4.45987	-0.56937	-1.42513	0.253632	0.00258978	0.0354505	0.281668
CG33263	trough	24	20	20	-0.0424099	0.903125	2.15049	-2.30862	4.4591	-0.931504	-1.25303	0.253747	0.00258978	0.0354505	0.281668
MED22	trough	24	20	12	-1.75439e-08	1	1.58764	-2.30203	3.88967	-0.689668	-1.06503	0.253747	0.00258978	0.0354505	0.281668
CG15916	trough	24	16	20	0.0238201	1.00709	2.58588	-2.22774	4.81362	-1.16076	-1.36177	0.25319	0.00258978	0.0354505	0.281668
CG2145	trough	24	8	4	1.75439e-08	1	1.87944	-2.79971	4.67916	-0.671298	-1.6544	0.252631	0.00258978	0.0354505	0.281668
CG14454	trough	24	4	20	-1.75439e-08	1	1.6309	-2.11788	3.74878	-0.770061	-1.19147	0.25313	0.00258978	0.0354505	0.281668
CG14526	trough	24	16	12	3.50877e-08	1	2.1633	-2.78508	4.94838	-0.776747	-1.26774	0.25319	0.00258978	0.0354505	0.281668
Hr46	trough	24	12	4	0.049416	0.941114	1.8023	-1.5961	3.3984	-1.12919	-1.08911	0.253024	0.00258978	0.0354505	0.281668
CG4065	trough	24	16	12	-5.26316e-08	1	1.79984	-2.87736	4.6772	-0.625516	-1.0511	0.251908	0.00270607	0.0367805	0.286611
anon-67Ea	trough	24	12	12	-0.0467793	0.928166	1.53703	-2.88635	4.42338	-0.532518	-1.22233	0.251743	0.00270607	0.0367805	0.286611
CG14341	trough	24	4	20	1.75439e-08	1	2.02973	-2.32112	4.35084	-0.87446	-1.10204	0.251845	0.00270607	0.0367805	0.286611
Hcf	trough	24	20	4	-1.75439e-08	1	1.5108	-3.04971	4.56051	-0.495391	-1.72615	0.251743	0.00270607	0.0367805	0.286611
CG9941	trough	24	0	12	-0.0568182	1.03915	1.43973	-3.89384	5.33357	-0.369745	-1.15266	0.252344	0.00270607	0.0367805	0.286611
CG5167	trough	24	12	4	1.75439e-08	1	1.69439	-3.06917	4.76356	-0.552068	-1.09196	0.251743	0.00270607	0.0367805	0.286611
Hsp23	trough	24	8	4	-9.49533e-18	1	2.21266	-2.24217	4.45483	-0.986839	-0.782476	0.251349	0.00270607	0.0367805	0.286611
Spase18-21	trough	24	8	12	-2.04515e-17	1	2.03232	-2.48018	4.5125	-0.819427	-1.45935	0.251349	0.00270607	0.0367805	0.286611
CG13933	trough	24	0	20	-2.33731e-17	1	1.41658	-3.48094	4.89752	-0.406952	-5.19082	0.252344	0.00270607	0.0367805	0.286611
Rh50	trough	24	0	4	1.16866e-17	1	2.22584	-2.1164	4.34224	-1.05171	-0.954564	0.252344	0.00270607	0.0367805	0.286611
Arpc3A	trough	24	8	12	-5.26316e-08	1	1.97526	-2.84804	4.8233	-0.69355	-1.02604	0.251349	0.00270607	0.0367805	0.286611
CG12402	trough	24	0	20	-0.0225745	1.00548	1.80815	-2.85868	4.66683	-0.632513	-1.25093	0.252344	0.00270607	0.0367805	0.286611
Cp18	trough	24	4	4	-1.55821e-17	1	2.6852	-1.95287	4.63808	-1.375	-1.12141	0.251845	0.00270607	0.0367805	0.286611
Osi2	trough	24	4	12	-0.0159664	0.998365	2.35755	-2.34269	4.70023	-1.00634	-0.95688	0.251845	0.00270607	0.0367805	0.286611
emb	trough	24	4	12	0.0457044	0.962964	1.6424	-2.18515	3.82755	-0.751621	-1.69296	0.251845	0.00270607	0.0367805	0.286611
CG7430	trough	24	0	4	1.55821e-17	1	2.11401	-2.144	4.258	-0.986012	-0.825728	0.252344	0.00270607	0.0367805	0.286611
armi	trough	24	20	20	-0.0787931	1.03663	1.93436	-2.8891	4.82346	-0.669536	-1.1066	0.252466	0.00270607	0.0367805	0.286611
CG13295	trough	24	20	12	-0.0366211	0.892902	1.38481	-3.38386	4.76867	-0.40924	-1.36023	0.252466	0.00270607	0.0367805	0.286611
CG11876	trough	24	0	4	-1.75439e-08	1	3.30661	-2.06342	5.37003	-1.60249	-1.09475	0.252344	0.00270607	0.0367805	0.286611
Spn27A	trough	24	16	12	0.0230646	1.0061	1.60715	-2.89966	4.50681	-0.554255	-1.59576	0.251908	0.00270607	0.0367805	0.286611
CG12972	trough	24	16	20	1.75439e-08	1	1.99987	-3.77492	5.77479	-0.529778	-1.48909	0.251908	0.00270607	0.0367805	0.286611
Vap-33-1	trough	24	8	20	-1.94776e-18	1	3.38713	-2.49453	5.88165	-1.35782	-0.89037	0.251349	0.00270607	0.0367805	0.286611
Sclp	trough	24	4	12	-0.000239614	0.991191	1.71083	-2.23726	3.94809	-0.764698	-1.15014	0.251845	0.00270607	0.0367805	0.286611
CG10414	trough	24	16	4	-0.0808842	1.02332	1.48159	-2.63663	4.11822	-0.561925	-1.76949	0.250626	0.00282701	0.0382705	0.291871
Ntf-2	trough	24	4	20	-1.75439e-08	1	1.67886	-2.69379	4.37265	-0.623233	-1.05272	0.25056	0.00282701	0.0382705	0.291871
snama	trough	24	16	4	0.0127557	0.995775	1.4832	-3.71213	5.19533	-0.399554	-1.69759	0.250626	0.00282701	0.0382705	0.291871
RhoGAP15B	trough	24	4	20	8.77193e-08	1	2.13446	-4.13496	6.26942	-0.516199	-1.11311	0.25056	0.00282701	0.0382705	0.291871
CG34318	trough	24	4	12	0.0283034	1.01188	1.93576	-2.90432	4.84008	-0.666512	-1.40703	0.25056	0.00282701	0.0382705	0.291871
CG8184	trough	24	4	20	-1.05263e-07	1	1.87997	-2.21726	4.09723	-0.847879	-1.35457	0.25056	0.00282701	0.0382705	0.291871
CG9797	trough	24	20	4	-7.01754e-08	1	1.6143	-2.57402	4.18831	-0.627152	-1.0265	0.250461	0.00282701	0.0382705	0.291871
CG5728	trough	24	16	20	-1.75439e-08	1	1.94433	-2.7941	4.73843	-0.69587	-1.288	0.250626	0.00282701	0.0382705	0.291871
sage	trough	24	12	4	-1.75439e-08	1	1.27406	-3.47679	4.75085	-0.366448	-2.50483	0.250461	0.00282701	0.0382705	0.291871
CG7181	trough	24	0	20	4.8694e-18	1	1.88599	-2.3527	4.23869	-0.801627	-0.968548	0.251057	0.00282701	0.0382705	0.291871
Nplp3	trough	24	4	12	-5.26316e-08	1	2.0901	-2.29897	4.38907	-0.909145	-0.801145	0.25056	0.00282701	0.0382705	0.291871
CG7058	trough	24	8	4	-0.0357785	1.07192	1.73121	-2.70053	4.43174	-0.64106	-0.864943	0.250067	0.00282701	0.0382705	0.291871
Cat	trough	24	16	4	1.75439e-08	1	1.83741	-2.50158	4.33899	-0.734502	-1.4216	0.250626	0.00282701	0.0382705	0.291871
CG10038	trough	24	20	4	1.94776e-17	1	1.95861	-2.87943	4.83804	-0.680207	-1.25241	0.250461	0.00282701	0.0382705	0.291871
mthl5	trough	24	8	4	-4.8694e-18	1	1.89562	-3.27695	5.17257	-0.57847	-1.1574	0.250067	0.00282701	0.0382705	0.291871
CG31033	trough	24	8	20	-0.0301485	0.965112	1.6759	-2.53584	4.21174	-0.660887	-0.957855	0.250067	0.00282701	0.0382705	0.291871
Ccn	trough	24	0	20	-0.0239137	1.14189	2.62656	-2.99526	5.62182	-0.876904	-0.855808	0.251057	0.00282701	0.0382705	0.291871
egl	trough	24	16	20	1.75439e-08	1	2.06977	-2.15955	4.22931	-0.958429	-0.917275	0.250626	0.00282701	0.0382705	0.291871
CG10158	trough	24	12	12	5.26316e-08	1	2.69709	-2.22981	4.92689	-1.20956	-1.20899	0.250461	0.00282701	0.0382705	0.291871
abs	trough	24	16	4	-0.121296	1.03113	1.80224	-2.13471	3.93695	-0.844254	-0.967508	0.250626	0.00282701	0.0382705	0.291871
CG10340	trough	24	20	12	-7.01754e-08	1	1.61712	-2.57505	4.19218	-0.627996	-1.21745	0.251184	0.00282701	0.0382705	0.291871
CG8043	trough	24	16	12	-3.50877e-08	1	2.12127	-3.36433	5.4856	-0.630517	-1.33853	0.250626	0.00282701	0.0382705	0.291871
CG8414	trough	24	0	12	0.0156201	0.998058	1.88583	-2.45229	4.33812	-0.769006	-1.44856	0.250492	0.00282701	0.0382705	0.291871
wun	trough	24	20	4	-7.01754e-08	1	2.0361	-3.20525	5.24134	-0.635238	-1.44509	0.250461	0.00282701	0.0382705	0.291871
Cyp9f2	trough	24	20	20	0	1	2.04241	-1.87769	3.92011	-1.08773	-1.05752	0.251184	0.00282701	0.0382705	0.291871
CG31103	trough	24	16	20	8.77193e-08	1	2.27662	-2.05099	4.32761	-1.11001	-1.09768	0.250626	0.00282701	0.0382705	0.291871
CG10332	trough	24	12	20	-0.0103751	1.0331	1.88938	-2.82694	4.71632	-0.668346	-1.05793	0.24918	0.00295276	0.0397005	0.298861
Obp85a	trough	24	4	4	-0.0106262	0.946241	1.57765	-3.12891	4.70656	-0.504218	-1.45156	0.249275	0.00295276	0.0397005	0.298861
CG1910	trough	24	0	20	0.0152742	0.997758	2.26643	-2.37495	4.64138	-0.954306	-1.39331	0.249769	0.00295276	0.0397005	0.298861
ncd	trough	24	4	12	-0.0437101	0.960499	1.38352	-3.20102	4.58454	-0.432213	-1.39266	0.249275	0.00295276	0.0397005	0.298861
Crc	trough	24	8	12	-3.50877e-08	1	1.72611	-2.57226	4.29837	-0.67105	-1.34858	0.248784	0.00295276	0.0397005	0.298861
Gos28	trough	24	16	4	-1.22807e-07	1	2.12218	-2.15781	4.27999	-0.983489	-0.801216	0.249344	0.00295276	0.0397005	0.298861
cyr	trough	24	16	12	5.26316e-08	1	1.89029	-2.18014	4.07044	-0.86705	-1.03946	0.249344	0.00295276	0.0397005	0.298861
CG32305	trough	24	0	20	-0.00283369	0.991416	1.85806	-3.0323	4.89035	-0.612755	-1.17546	0.249769	0.00295276	0.0397005	0.298861
CG18347	trough	24	20	12	-1.75439e-08	1	2.67848	-2.23799	4.91647	-1.19683	-1.5994	0.249903	0.00295276	0.0397005	0.298861
Rpt1	trough	24	8	20	-1.75439e-08	1	1.89899	-2.29407	4.19306	-0.82778	-0.999802	0.248784	0.00295276	0.0397005	0.298861
CG9801	trough	24	8	20	-7.79104e-18	1	2.40294	-1.95017	4.35311	-1.23217	-0.985179	0.248784	0.00295276	0.0397005	0.298861
Atg6	trough	24	16	20	0.0160249	0.97623	1.79634	-2.34889	4.14522	-0.76476	-1.28873	0.249344	0.00295276	0.0397005	0.298861
CG8965	trough	24	12	20	-0.0429815	0.998493	1.86065	-2.6658	4.52645	-0.69797	-1.15639	0.24918	0.00295276	0.0397005	0.298861
CG14650	trough	24	0	4	-5.26316e-08	1	2.10836	-2.5696	4.67796	-0.820499	-1.48844	0.249769	0.00295276	0.0397005	0.298861
CG16721	trough	24	16	20	3.50877e-08	1	1.51227	-1.95577	3.46804	-0.773234	-1.14747	0.249344	0.00295276	0.0397005	0.298861
jhamt	trough	24	20	4	-0.00951329	0.967033	2.17714	-2.68207	4.85921	-0.811739	-1.20969	0.24918	0.00295276	0.0397005	0.298861
Pp2C1	trough	24	0	4	0.0502916	0.983692	1.97691	-2.59909	4.576	-0.760613	-1.26705	0.248482	0.00308347	0.0410505	0.301706
CG5089	trough	24	0	4	-0.0141903	0.987675	2.53835	-1.69904	4.23739	-1.49399	-1.05424	0.248482	0.00308347	0.0410505	0.301706
CG13484	trough	24	4	12	-0.0258501	1.02981	2.28647	-3.40908	5.69555	-0.6707	-1.24696	0.24799	0.00308347	0.0410505	0.301706
CG9689	trough	24	4	20	1.75439e-08	1	1.84262	-2.8707	4.71332	-0.641872	-1.39569	0.24799	0.00308347	0.0410505	0.301706
CG1572	trough	24	4	20	-5.26316e-08	1	1.79229	-3.32832	5.12062	-0.538497	-1.16172	0.24799	0.00308347	0.0410505	0.301706
f-cup	trough	24	12	12	3.89552e-18	1	2.22292	-3.74837	5.9713	-0.593037	-1.22022	0.247899	0.00308347	0.0410505	0.301706
CG9063	trough	24	0	4	3.50877e-08	1	2.09333	-2.13432	4.22764	-0.980794	-1.22866	0.248482	0.00308347	0.0410505	0.301706
CG13917	trough	24	4	20	0.0231487	0.992487	1.78594	-2.3336	4.11955	-0.765317	-1.02284	0.24799	0.00308347	0.0410505	0.301706
CG6503	trough	24	0	20	-7.01754e-08	1	2.32006	-2.09471	4.41477	-1.10758	-1.08973	0.248482	0.00308347	0.0410505	0.301706
Prp31	trough	24	4	20	0.0010294	0.982839	2.55374	-2.70286	5.2566	-0.944827	-1.59251	0.24799	0.00308347	0.0410505	0.301706
CG4709	trough	24	8	4	1.80168e-17	1	2.27968	-2.33018	4.60986	-0.978326	-1.02167	0.247502	0.00308347	0.0410505	0.301706
Hsp68	trough	24	16	4	0.0231954	1.0229	2.46425	-3.5686	6.03285	-0.690538	-2.51875	0.248062	0.00308347	0.0410505	0.301706
lush	trough	24	8	12	0.00238739	0.978394	1.64367	-3.26179	4.90547	-0.503918	-2.02293	0.247502	0.00308347	0.0410505	0.301706
jp	trough	24	4	4	-3.50877e-08	1	1.38263	-3.04271	4.42534	-0.454406	-1.58764	0.24799	0.00308347	0.0410505	0.301706
Catsup	trough	24	8	20	5.84328e-18	1	2.64034	-2.49682	5.13716	-1.05748	-1.65193	0.247502	0.00308347	0.0410505	0.301706
E(Pc)	trough	24	16	20	-0.0394786	0.995	1.89057	-3.19756	5.08813	-0.591253	-1.16339	0.248062	0.00308347	0.0410505	0.301706
nyo	trough	24	0	20	0.00826742	0.942501	1.47423	-3.50157	4.97579	-0.421019	-1.87342	0.248482	0.00308347	0.0410505	0.301706
CG5050	trough	24	16	12	-0.0166002	0.924278	1.5244	-2.76679	4.29119	-0.550961	-1.19823	0.248062	0.00308347	0.0410505	0.301706
tun	trough	24	8	20	0	1	1.34388	-2.6558	3.99968	-0.506017	-1.2577	0.247502	0.00308347	0.0410505	0.301706
B4	trough	24	4	4	-0.00106705	0.925123	2.1236	-2.47379	4.59739	-0.858438	-1.04012	0.24799	0.00308347	0.0410505	0.301706
CG12496	trough	24	16	20	0.095582	0.999911	2.44205	-2.92632	5.36836	-0.834511	-1.6806	0.248062	0.00308347	0.0410505	0.301706
CG34357	trough	24	4	12	0.0624158	1.01672	2.23285	-2.08975	4.3226	-1.06848	-1.24979	0.24799	0.00308347	0.0410505	0.301706
Vm34Ca	trough	24	4	4	-3.50877e-08	1	2.42804	-1.86626	4.2943	-1.30102	-0.888842	0.24799	0.00308347	0.0410505	0.301706
hh	trough	24	0	4	0.0155557	0.977931	1.37671	-3.06553	4.44223	-0.449093	-1.64073	0.248482	0.00308347	0.0410505	0.301706
CG9897	trough	24	16	12	0.036579	1.02615	2.53353	-2.2519	4.78543	-1.12507	-1.94601	0.248062	0.00308347	0.0410505	0.301706
Fmrf	trough	24	0	12	-0.0192006	1.00155	2.18085	-2.37927	4.56012	-0.916603	-0.925291	0.248482	0.00308347	0.0410505	0.301706
Sap-r	trough	24	20	4	7.01754e-08	1	1.7365	-2.22678	3.96328	-0.779826	-1.10011	0.247899	0.00308347	0.0410505	0.301706
CG12765	trough	24	16	12	-1.05263e-07	1	2.2182	-3.30039	5.51859	-0.672104	-1.31648	0.247498	0.00308347	0.0410505	0.301706
CG9920	trough	24	0	4	-0.0810057	1.01354	1.98085	-2.5297	4.51055	-0.783036	-0.987077	0.248482	0.00308347	0.0410505	0.301706
Max	trough	24	16	20	-3.50877e-08	1	1.92425	-2.29062	4.21487	-0.840054	-1.06699	0.248062	0.00308347	0.0410505	0.301706
CG5524	trough	24	4	20	-0.0237789	1.00704	1.72278	-2.77953	4.50231	-0.61981	-1.23212	0.246706	0.00321931	0.0425905	0.305549
Cyp28a5	trough	24	20	4	3.50877e-08	1	2.3063	-2.00999	4.31628	-1.14742	-1.19133	0.246618	0.00321931	0.0425905	0.305549
Osi22	trough	24	4	20	-0.0656565	1.03937	2.53933	-2.27101	4.81034	-1.11815	-1.06737	0.246706	0.00321931	0.0425905	0.305549
CG6293	trough	24	16	12	-1.75439e-08	1	1.8979	-2.41415	4.31205	-0.786157	-1.70476	0.24678	0.00321931	0.0425905	0.305549
CG9664	trough	24	4	20	3.50877e-08	1	2.41859	-2.47762	4.8962	-0.976173	-1.00553	0.246706	0.00321931	0.0425905	0.305549
CG6036	trough	24	0	4	3.50877e-08	1	1.46944	-3.00777	4.47721	-0.488546	-2.68462	0.247195	0.00321931	0.0425905	0.305549
CG32396	trough	24	0	20	0.0130049	0.995955	1.761	-2.56053	4.32153	-0.687752	-1.58808	0.247195	0.00321931	0.0425905	0.305549
CG14566	trough	24	16	4	1.75439e-08	1	2.11311	-2.94527	5.05838	-0.717459	-1.25621	0.24678	0.00321931	0.0425905	0.305549
CG13029	trough	24	0	20	-1.75439e-08	1	2.41507	-2.99217	5.40724	-0.807129	-1.45721	0.247195	0.00321931	0.0425905	0.305549
CG4662	trough	24	0	20	0.0451452	0.990779	1.9938	-3.24354	5.23734	-0.6147	-2.03042	0.247195	0.00321931	0.0425905	0.305549
Psa	trough	24	12	4	-7.01754e-08	1	2.90842	-2.44825	5.35667	-1.18796	-1.09389	0.246618	0.00321931	0.0425905	0.305549
CG12907	trough	24	16	4	0.00547595	1.01075	1.70411	-2.34675	4.05085	-0.726158	-1.14295	0.24678	0.00321931	0.0425905	0.305549
CG5510	trough	24	12	12	7.01754e-08	1	1.95603	-2.15431	4.11034	-0.907958	-1.3046	0.246618	0.00321931	0.0425905	0.305549
l(2)efl	trough	24	12	4	3.50877e-08	1	1.94646	-3.66665	5.61311	-0.530854	-1.58724	0.246618	0.00321931	0.0425905	0.305549
CG10514	trough	24	0	4	0.0355388	0.993633	1.52732	-2.85119	4.37851	-0.53568	-4.12102	0.247195	0.00321931	0.0425905	0.305549
CG42249	trough	24	0	4	0	1	2.02827	-2.28517	4.31344	-0.887578	-1.20659	0.247195	0.00321931	0.0425905	0.305549
Tom20	trough	24	0	4	-1.75439e-08	1	1.88837	-2.21414	4.10251	-0.852871	-1.07929	0.247195	0.00321931	0.0425905	0.305549
eIF5	trough	24	16	12	-3.50877e-08	1	2.3015	-1.78539	4.08689	-1.28908	-1.09195	0.24678	0.00321931	0.0425905	0.305549
iotaTry	trough	24	0	4	-0.01193	0.976139	2.02366	-2.37839	4.40205	-0.850854	-1.00423	0.247195	0.00321931	0.0425905	0.305549
CG10911	trough	24	0	4	0.112639	1.02131	2.31219	-3.22457	5.53675	-0.717054	-1.32715	0.247195	0.00321931	0.0425905	0.305549
CG30116	trough	24	4	4	-0.0567078	1.00856	2.52399	-2.0491	4.57309	-1.23175	-0.711154	0.246706	0.00321931	0.0425905	0.305549
CG8878	trough	24	16	4	3.50877e-08	1	3.67438	-2.12197	5.79635	-1.73159	-0.932156	0.24678	0.00321931	0.0425905	0.305549
CG12868	trough	24	12	12	5.26316e-08	1	2.10714	-2.58341	4.69054	-0.815643	-1.42714	0.246618	0.00321931	0.0425905	0.305549
Cp110	trough	24	0	4	-3.50877e-08	1	1.67031	-3.35731	5.02762	-0.497513	-1.90612	0.247195	0.00321931	0.0425905	0.305549
shf	trough	24	12	4	0.0308789	1.00629	1.66247	-2.38924	4.05171	-0.695816	-1.53912	0.246618	0.00321931	0.0425905	0.305549
MED14	trough	24	16	4	-7.01754e-08	1	2.93676	-2.34653	5.28329	-1.25153	-1.38829	0.24678	0.00321931	0.0425905	0.305549
CG9701	trough	24	0	4	-1.75439e-08	1	2.62149	-2.332	4.95349	-1.12414	-1.00782	0.247195	0.00321931	0.0425905	0.305549
CG14956	trough	24	0	20	0.00102363	0.957321	1.87329	-2.06359	3.93688	-0.907784	-1.01418	0.247195	0.00321931	0.0425905	0.305549
mod	trough	24	20	20	1.75439e-08	1	1.62378	-1.93165	3.55543	-0.840618	-1.05409	0.24734	0.00321931	0.0425905	0.305549
Fib	trough	24	16	20	-5.26316e-08	1	2.02569	-2.57104	4.59673	-0.787885	-1.17072	0.24678	0.00321931	0.0425905	0.305549
CG3376	trough	24	0	4	5.26316e-08	1	2.38771	-2.54958	4.93729	-0.936511	-1.01355	0.247195	0.00321931	0.0425905	0.305549
CG7737	trough	24	16	4	0.158522	1.04725	2.6205	-2.45154	5.07205	-1.06892	-1.5311	0.245498	0.00336047	0.0442105	0.31024
CG11902	trough	24	0	20	-7.01754e-08	1	1.85363	-2.19507	4.04871	-0.844453	-1.44388	0.245907	0.00336047	0.0442105	0.31024
Baldspot	trough	24	4	12	0.0638091	0.906291	2.33602	-1.42167	3.7577	-1.64315	-1.05807	0.245421	0.00336047	0.0442105	0.31024
CG10660	trough	24	16	12	-7.01754e-08	1	1.56455	-2.62684	4.19139	-0.595604	-1.23497	0.245498	0.00336047	0.0442105	0.31024
Nsf2	trough	24	16	4	3.50877e-08	1	2.39027	-1.8196	4.20987	-1.31363	-1.01383	0.245498	0.00336047	0.0442105	0.31024
CG13862	trough	24	20	4	0.0490345	1.0017	2.00973	-3.52122	5.53096	-0.570748	-1.59572	0.245337	0.00336047	0.0442105	0.31024
CG12099	trough	24	4	12	-3.50877e-08	1	2.24655	-2.5672	4.81375	-0.875099	-1.21173	0.245421	0.00336047	0.0442105	0.31024
CycG	trough	24	4	12	-1.75439e-08	1	3.25991	-2.15563	5.41554	-1.51227	-0.832097	0.245421	0.00336047	0.0442105	0.31024
CG5807	trough	24	16	4	8.77193e-08	1	1.71432	-2.23941	3.95372	-0.765523	-1.09464	0.245498	0.00336047	0.0442105	0.31024
CG15155	trough	24	12	12	0.010522	0.987818	1.8776	-2.74157	4.61916	-0.684864	-1.31685	0.245337	0.00336047	0.0442105	0.31024
ea	trough	24	8	12	5.26316e-08	1	1.57769	-3.23424	4.81194	-0.487809	-1.30556	0.246219	0.00336047	0.0442105	0.31024
CG12121	trough	24	8	12	-0.108882	0.975539	1.84424	-2.12885	3.97309	-0.866308	-0.695934	0.246219	0.00336047	0.0442105	0.31024
CG6512	trough	24	16	12	-1.75439e-08	1	1.90345	-2.0426	3.94605	-0.931877	-1.03544	0.245498	0.00336047	0.0442105	0.31024
CG6234	trough	24	16	4	0.00316175	0.98314	2.30369	-2.79713	5.10082	-0.823589	-1.5829	0.245498	0.00336047	0.0442105	0.31024
Yp2	trough	24	0	20	-8.77193e-08	1	2.20512	-2.14935	4.35447	-1.02595	-1.07071	0.245907	0.00336047	0.0442105	0.31024
CG10264	trough	24	4	20	-0.0127773	0.939189	1.74322	-2.85099	4.59422	-0.611444	-1.32376	0.245421	0.00336047	0.0442105	0.31024
CG10581	trough	24	0	12	-0.00993615	0.977218	1.76894	-2.20912	3.97807	-0.800746	-1.29799	0.245907	0.00336047	0.0442105	0.31024
Usf	trough	24	4	20	3.50877e-08	1	1.33057	-2.55753	3.88811	-0.520256	-1.22617	0.245421	0.00336047	0.0442105	0.31024
Cyp309a1	trough	24	16	4	-0.0136586	0.98717	1.37685	-2.59449	3.97133	-0.530681	-1.18083	0.245498	0.00336047	0.0442105	0.31024
vkg	trough	24	12	12	1.75439e-08	1	1.95854	-2.75691	4.71544	-0.710412	-1.41087	0.245337	0.00336047	0.0442105	0.31024
CG4009	trough	24	20	4	-0.0114089	1.01042	1.42742	-2.33161	3.75903	-0.612202	-1.37477	0.245337	0.00336047	0.0442105	0.31024
Amy-d	trough	24	0	4	0.0246562	1.00822	1.74895	-2.94112	4.69007	-0.594652	-1.40096	0.245907	0.00336047	0.0442105	0.31024
l(1)G0255	trough	24	0	4	-3.50877e-08	1	2.5829	-2.15297	4.73587	-1.1997	-0.916064	0.245907	0.00336047	0.0442105	0.31024
NELF-B	trough	24	8	12	-1.75439e-08	1	2.4194	-2.7703	5.1897	-0.873335	-0.948257	0.246219	0.00336047	0.0442105	0.31024
Tace	trough	24	12	12	3.50877e-08	1	3.15573	-2.18445	5.34018	-1.44464	-0.985824	0.245337	0.00336047	0.0442105	0.31024
mRpS16	trough	24	0	4	-7.01754e-08	1	2.49938	-2.33037	4.82974	-1.07253	-1.11507	0.245907	0.00336047	0.0442105	0.31024
eIF4G	trough	24	8	4	1.75439e-08	1	1.76607	-2.60194	4.36801	-0.678751	-1.30239	0.246219	0.00336047	0.0442105	0.31024
CG12112	trough	24	0	4	0.0974311	1.02711	1.86545	-3.66115	5.5266	-0.509524	-2.44775	0.245907	0.00336047	0.0442105	0.31024
vig	trough	24	20	4	1.75439e-08	1	2.91956	-1.67753	4.59708	-1.74039	-0.824524	0.245337	0.00336047	0.0442105	0.31024
CG1698	trough	24	0	4	3.89552e-18	1	1.71542	-2.60295	4.31837	-0.659028	-1.39933	0.24462	0.0035071	0.0460105	0.3155
CG18493	trough	24	0	4	0.0421266	1.00641	1.57438	-2.28262	3.857	-0.689723	-1.51088	0.24462	0.0035071	0.0460105	0.3155
CG13171	trough	24	0	20	0.0233745	0.974333	1.86171	-2.49798	4.3597	-0.745287	-1.321	0.24462	0.0035071	0.0460105	0.3155
CG33630	trough	24	20	4	-0.100017	1.04464	1.91985	-2.5593	4.47915	-0.750145	-0.886264	0.244056	0.0035071	0.0460105	0.3155
CG14985	trough	24	12	20	-0.0132378	1.07336	2.63941	-1.98859	4.628	-1.32727	-1.2272	0.244056	0.0035071	0.0460105	0.3155
baf	trough	24	8	12	-1.94776e-18	1	2.3236	-2.89113	5.21473	-0.803699	-0.941759	0.244937	0.0035071	0.0460105	0.3155
Pfrx	trough	24	12	12	-2.33731e-17	1	3.5623	-2.24682	5.80912	-1.58549	-0.633174	0.244056	0.0035071	0.0460105	0.3155
retinin	trough	24	4	12	3.50877e-08	1	2.21146	-2.47448	4.68595	-0.893707	-1.17198	0.244136	0.0035071	0.0460105	0.3155
CG13322	trough	24	12	4	-0.000685932	0.991203	2.04992	-2.76103	4.81095	-0.74245	-1.32333	0.244056	0.0035071	0.0460105	0.3155
CG1890	trough	24	12	12	0.0759508	1.02588	1.99066	-2.84949	4.84015	-0.698601	-1.2386	0.244056	0.0035071	0.0460105	0.3155
pr-set7	trough	24	8	4	-0.116789	1.03229	1.90108	-2.90282	4.80389	-0.654907	-0.814208	0.244937	0.0035071	0.0460105	0.3155
CG5466	trough	24	20	4	1.75439e-08	1	2.43293	-2.51436	4.94729	-0.967612	-1.52638	0.244056	0.0035071	0.0460105	0.3155
CG7408	trough	24	12	12	0.0173846	0.99211	1.4857	-2.93514	4.42085	-0.506178	-1.30477	0.244056	0.0035071	0.0460105	0.3155
CG18190	trough	24	4	4	-0.0275435	1.0956	1.96029	-3.08485	5.04515	-0.635458	-0.978429	0.244136	0.0035071	0.0460105	0.3155
l(2)k01209	trough	24	12	20	1.75439e-08	1	2.73107	-2.34238	5.07345	-1.16594	-1.2014	0.244056	0.0035071	0.0460105	0.3155
npf	trough	24	4	12	-0.0279233	1.0204	1.62896	-3.3917	5.02066	-0.480279	-1.32856	0.244136	0.0035071	0.0460105	0.3155
CG8060	trough	24	0	20	0.0560722	0.973406	2.05915	-2.50609	4.56524	-0.821657	-1.74561	0.24462	0.0035071	0.0460105	0.3155
lace	trough	24	8	20	-7.79104e-18	1	2.18489	-2.04304	4.22793	-1.06943	-0.980913	0.244937	0.0035071	0.0460105	0.3155
CG11399	trough	24	16	12	8.77193e-08	1	2.79005	-2.68416	5.47422	-1.03945	-1.11012	0.244216	0.0035071	0.0460105	0.3155
Cyt-b5-r	trough	24	4	12	1.75439e-08	1	1.782	-2.46202	4.24402	-0.723798	-1.2891	0.244136	0.0035071	0.0460105	0.3155
Nep2	trough	24	0	12	-3.50877e-08	1	1.95587	-2.31865	4.27452	-0.843536	-1.10573	0.24462	0.0035071	0.0460105	0.3155
SIP3	trough	24	0	20	-0.0601687	0.983184	1.44818	-3.24757	4.69575	-0.445926	-0.906701	0.24462	0.0035071	0.0460105	0.3155
CG5220	trough	24	20	12	0.00885166	0.989613	1.5359	-2.84875	4.38465	-0.539149	-1.50775	0.244776	0.0035071	0.0460105	0.3155
CG9286	trough	24	12	20	-0.023583	1.00678	1.55855	-2.60932	4.16788	-0.597301	-1.20757	0.244056	0.0035071	0.0460105	0.3155
CG17486	trough	24	16	20	1.75439e-08	1	1.88482	-2.27099	4.15582	-0.829956	-1.06079	0.244216	0.0035071	0.0460105	0.3155
Pde6	trough	24	20	20	0.0274477	0.968452	1.91924	-4.01378	5.93302	-0.478162	-1.26	0.244776	0.0035071	0.0460105	0.3155
alpha-Man-IIb	trough	24	16	20	1.75439e-08	1	1.99988	-2.52982	4.5297	-0.790519	-0.875379	0.244216	0.0035071	0.0460105	0.3155
CG12026	trough	24	0	4	0.0872993	0.966888	2.02135	-2.87939	4.90073	-0.702005	-1.98227	0.24462	0.0035071	0.0460105	0.3155
numb	trough	24	16	12	5.26316e-08	1	1.81181	-1.80912	3.62093	-1.00149	-1.18793	0.244216	0.0035071	0.0460105	0.3155
put	trough	24	20	4	3.50877e-08	1	2.09727	-2.8183	4.91557	-0.744162	-1.08409	0.244056	0.0035071	0.0460105	0.3155
sPLA2	trough	24	20	20	3.50877e-08	1	2.14236	-2.39341	4.53577	-0.895109	-1.31768	0.244776	0.0035071	0.0460105	0.3155
Rab11	trough	24	4	20	1.75439e-08	1	2.50526	-2.08322	4.58848	-1.20259	-1.44475	0.242851	0.0036594	0.0475705	0.317774
PGRP-LE	trough	24	4	20	1.75439e-08	1	1.48925	-2.63814	4.12739	-0.564507	-1.56	0.242851	0.0036594	0.0475705	0.317774
CG8768	trough	24	0	4	3.50877e-08	1	2.56119	-2.21118	4.77237	-1.15829	-0.959068	0.243332	0.0036594	0.0475705	0.317774
ade2	trough	24	4	20	1.75439e-08	1	2.12711	-2.07648	4.20359	-1.02438	-1.42596	0.242851	0.0036594	0.0475705	0.317774
CG7375	trough	24	20	12	-8.77193e-08	1	1.83587	-2.3376	4.17347	-0.785367	-1.26498	0.243495	0.0036594	0.0475705	0.317774
CG3618	trough	24	0	12	-0.0211253	1.0373	1.9607	-2.76981	4.73051	-0.707881	-1.06098	0.243332	0.0036594	0.0475705	0.317774
CG13407	trough	24	4	12	-0.0522186	0.887425	1.36247	-2.86683	4.2293	-0.475255	-1.19023	0.242851	0.0036594	0.0475705	0.317774
alphaTub84B	trough	24	16	4	-3.89552e-18	1	2.6078	-2.01856	4.62637	-1.29191	-1.47787	0.242934	0.0036594	0.0475705	0.317774
nuf	trough	24	20	4	-0.117651	1.05196	1.99609	-2.42138	4.41747	-0.824357	-0.741809	0.242775	0.0036594	0.0475705	0.317774
CG8197	trough	24	12	20	-1.75439e-08	1	1.85688	-2.51232	4.3692	-0.739108	-1.10322	0.242775	0.0036594	0.0475705	0.317774
CG11200	trough	24	16	4	1.94776e-18	1	1.57117	-2.51113	4.08231	-0.625683	-1.13318	0.242934	0.0036594	0.0475705	0.317774
CG12079	trough	24	0	4	-9.7388e-19	1	1.65674	-2.69159	4.34833	-0.615524	-1.88486	0.243332	0.0036594	0.0475705	0.317774
CG4721	trough	24	12	12	-1.75439e-08	1	1.97581	-2.32616	4.30197	-0.849385	-1.017	0.242775	0.0036594	0.0475705	0.317774
CadN	trough	24	20	4	7.79104e-18	1	1.54951	-2.20652	3.75603	-0.702242	-0.925982	0.242775	0.0036594	0.0475705	0.317774
CG33255	trough	24	0	20	0.0339345	1.00469	2.13587	-2.11338	4.24925	-1.01064	-1.12559	0.243332	0.0036594	0.0475705	0.317774
CG31823	trough	24	12	20	0.0576984	1.05792	2.37424	-2.8965	5.27074	-0.819694	-2.22794	0.242775	0.0036594	0.0475705	0.317774
Pde11	trough	24	0	20	0.00606543	0.982828	2.15593	-2.42802	4.58395	-0.887939	-1.0169	0.243332	0.0036594	0.0475705	0.317774
CG18173	trough	24	12	12	1.75439e-08	1	2.22388	-2.33503	4.55892	-0.9524	-1.10131	0.242775	0.0036594	0.0475705	0.317774
Uba1	trough	24	8	20	-5.26316e-08	1	1.59962	-3.11455	4.71417	-0.513597	-1.46321	0.243655	0.0036594	0.0475705	0.317774
l(3)neo18	trough	24	16	12	5.26316e-08	1	2.02351	-1.87473	3.89824	-1.07936	-0.987056	0.242934	0.0036594	0.0475705	0.317774
Pros29	trough	24	8	20	3.50877e-08	1	2.23104	-1.94102	4.17206	-1.14942	-0.961652	0.243655	0.0036594	0.0475705	0.317774
CG11284	trough	24	8	20	-1.64342e-17	1	3.23917	-2.4901	5.72927	-1.30082	-1.51972	0.243655	0.0036594	0.0475705	0.317774
nrv1	trough	24	8	20	-1.75439e-08	1	2.64393	-2.03719	4.68112	-1.29783	-1.12204	0.243655	0.0036594	0.0475705	0.317774
CG14459	trough	24	4	20	0.0372225	1.00334	1.87935	-2.4192	4.29855	-0.776851	-1.4237	0.242851	0.0036594	0.0475705	0.317774
CG9497	trough	24	16	20	1.55821e-17	1	2.1069	-2.73501	4.84191	-0.770346	-1.26631	0.242934	0.0036594	0.0475705	0.317774
CG6125	trough	24	20	12	-5.26316e-08	1	1.78814	-2.12489	3.91303	-0.84152	-1.38744	0.243495	0.0036594	0.0475705	0.317774
CG7288	trough	24	20	4	-7.01754e-08	1	1.61571	-2.78409	4.39981	-0.580337	-2.46283	0.242775	0.0036594	0.0475705	0.317774
asf1	trough	24	20	12	-1.75439e-08	1	2.15539	-2.78293	4.93832	-0.774503	-1.82297	0.243495	0.0036594	0.0475705	0.317774
Tim17b2	trough	24	0	20	-0.026132	0.974649	1.94047	-2.38117	4.32164	-0.81492	-0.936179	0.243332	0.0036594	0.0475705	0.317774
debcl	trough	24	16	20	-1.16866e-17	1	2.95175	-1.85187	4.80362	-1.59392	-1.04526	0.242934	0.0036594	0.0475705	0.317774
CG15547	trough	24	0	20	-0.174461	1.10447	1.97293	-3.33275	5.30568	-0.591982	-0.881078	0.243332	0.0036594	0.0475705	0.317774
CG34164	trough	24	20	4	0.00406375	0.9856	1.57928	-2.51319	4.09248	-0.628397	-1.76961	0.242775	0.0036594	0.0475705	0.317774
CG13071	trough	24	0	12	-0.0800269	0.96804	2.01043	-2.63049	4.64091	-0.764279	-1.28248	0.243332	0.0036594	0.0475705	0.317774
CG6294	trough	24	20	4	-7.01754e-08	1	1.95596	-3.00213	4.95808	-0.651524	-1.21547	0.242775	0.0036594	0.0475705	0.317774
CG11877	trough	24	20	12	-0.0230376	0.984762	1.9729	-2.75375	4.72666	-0.716443	-1.36048	0.243495	0.0036594	0.0475705	0.317774
Atg5	trough	24	16	20	1.75439e-08	1	2.07729	-2.46302	4.54031	-0.843393	-1.0895	0.242934	0.0036594	0.0475705	0.317774
MICAL-like	trough	24	16	4	-1.07127e-17	1	1.75487	-2.0501	3.80497	-0.855992	-1.64752	0.241652	0.00381754	0.0492705	0.322876
CG14540	trough	24	16	12	0.0514443	0.977402	1.77111	-2.9369	4.70801	-0.603055	-1.65266	0.241652	0.00381754	0.0492705	0.322876
CG14257	trough	24	0	4	0.125615	1.00901	2.22935	-2.93016	5.15951	-0.760831	-3.7999	0.242045	0.00381754	0.0492705	0.322876
gd	trough	24	12	4	-0.0786082	0.999348	1.5172	-2.5643	4.0815	-0.591662	-0.96397	0.241493	0.00381754	0.0492705	0.322876
CG4707	trough	24	4	12	0.0227482	1.0057	2.60238	-3.2914	5.89378	-0.790662	-1.16029	0.241566	0.00381754	0.0492705	0.322876
CG10703	trough	24	20	20	0.0986696	0.986809	1.95422	-2.30143	4.25565	-0.849132	-1.26368	0.242213	0.00381754	0.0492705	0.322876
CG32226	trough	24	4	20	-1.75439e-08	1	2.38021	-1.89121	4.27143	-1.25856	-1.01724	0.241566	0.00381754	0.0492705	0.322876
CG6870	trough	24	20	20	-3.50877e-08	1	2.34928	-2.08822	4.4375	-1.12501	-0.819518	0.242213	0.00381754	0.0492705	0.322876
CG5721	trough	24	8	12	-3.50877e-08	1	2.14162	-3.06208	5.2037	-0.699402	-1.23423	0.242372	0.00381754	0.0492705	0.322876
CG8617	trough	24	8	12	-5.26316e-08	1	2.27416	-2.33576	4.60993	-0.973627	-0.875974	0.242372	0.00381754	0.0492705	0.322876
CG13550	trough	24	4	12	-0.026757	1.01121	1.74761	-3.69758	5.44519	-0.472635	-1.37997	0.241566	0.00381754	0.0492705	0.322876
Rlb1	trough	24	0	20	0.036093	1.02733	2.0573	-2.47358	4.53088	-0.831709	-0.965018	0.242045	0.00381754	0.0492705	0.322876
Hop	trough	24	12	12	-5.26316e-08	1	2.53726	-1.96231	4.49957	-1.293	-1.45086	0.241493	0.00381754	0.0492705	0.322876
att-ORFA	trough	24	12	12	1.85037e-17	1	1.95521	-3.77482	5.73004	-0.517961	-1.34276	0.241493	0.00381754	0.0492705	0.322876
Df31	trough	24	8	12	0.00172988	0.991274	1.43501	-3.00414	4.43914	-0.477676	-1.40547	0.242372	0.00381754	0.0492705	0.322876
CG7987	trough	24	16	12	-0.0180655	1.00037	2.29888	-2.93268	5.23157	-0.783884	-1.26792	0.241652	0.00381754	0.0492705	0.322876
CG6915	trough	24	8	4	0.0356461	0.97275	2.65652	-2.72651	5.38303	-0.974327	-1.36253	0.242372	0.00381754	0.0492705	0.322876
Faa	trough	24	4	12	-0.0093554	0.97826	2.03936	-2.85755	4.89691	-0.713675	-1.41259	0.241566	0.00381754	0.0492705	0.322876
CG18549	trough	24	20	20	3.50877e-08	1	2.12412	-2.70067	4.82479	-0.786515	-1.31449	0.242213	0.00381754	0.0492705	0.322876
CG34314	trough	24	0	4	0.104604	1.08497	3.11319	-2.38601	5.4992	-1.30477	-1.16637	0.242045	0.00381754	0.0492705	0.322876
bsk	trough	24	20	4	-1.75439e-08	1	2.29647	-2.25358	4.55005	-1.01903	-1.10311	0.241493	0.00381754	0.0492705	0.322876
ClC-b	trough	24	20	4	-8.77193e-08	1	2.06144	-2.08789	4.14933	-0.987331	-1.1299	0.241493	0.00381754	0.0492705	0.322876
CG5026	trough	24	12	4	-0.0422581	1.00255	1.53238	-2.566	4.09838	-0.597184	-1.4371	0.241493	0.00381754	0.0492705	0.322876
nonA	trough	24	4	20	5.26316e-08	1	1.98591	-3.56745	5.55336	-0.556674	-1.55461	0.241566	0.00381754	0.0492705	0.322876
CG12091	trough	24	20	12	3.50877e-08	1	2.84175	-2.59986	5.44162	-1.09304	-0.888291	0.242213	0.00381754	0.0492705	0.322876
CG7337	trough	24	20	20	2.4347e-17	1	2.50296	-2.3346	4.83757	-1.07212	-1.20698	0.242213	0.00381754	0.0492705	0.322876
epsilonCOP	trough	24	0	20	-0.0166668	1.02547	1.78901	-2.78147	4.57048	-0.643189	-1.06904	0.242045	0.00381754	0.0492705	0.322876
CG10623	trough	24	0	4	-3.50877e-08	1	2.31482	-2.83147	5.14629	-0.817536	-1.21898	0.240757	0.00398172	0.0511305	0.326338
CG13872	trough	24	0	20	0.0274883	0.990996	1.94933	-3.58123	5.53056	-0.544318	-1.48997	0.240757	0.00398172	0.0511305	0.326338
CG5172	trough	24	8	20	-1.75439e-08	1	2.06713	-2.97879	5.04592	-0.693949	-1.58751	0.24109	0.00398172	0.0511305	0.326338
RluA-1	trough	24	12	12	0.0361479	1.02744	2.06043	-3.1012	5.16163	-0.664399	-2.2643	0.240212	0.00398172	0.0511305	0.326338
CG40485	trough	24	4	20	-1.75439e-08	1	2.23026	-2.13792	4.36817	-1.04319	-1.26127	0.240281	0.00398172	0.0511305	0.326338
CG34317	trough	24	0	4	5.26316e-08	1	1.98829	-2.35136	4.33964	-0.84559	-1.04752	0.240757	0.00398172	0.0511305	0.326338
CG9855	trough	24	8	20	-1.75439e-08	1	2.0402	-2.42718	4.46738	-0.840566	-1.38191	0.24109	0.00398172	0.0511305	0.326338
TwdlD	trough	24	0	20	-0.0367129	1.00821	1.73561	-3.37762	5.11323	-0.513857	-1.10316	0.240757	0.00398172	0.0511305	0.326338
eIF5B	trough	24	4	4	-0.0114113	0.994861	1.63824	-2.85902	4.49726	-0.573008	-1.25671	0.240281	0.00398172	0.0511305	0.326338
Bro	trough	24	8	12	0.154513	1.05366	2.76694	-2.75198	5.51892	-1.00543	-1.96831	0.24109	0.00398172	0.0511305	0.326338
blw	trough	24	0	4	-3.50877e-08	1	1.92909	-3.23051	5.1596	-0.597147	-1.20346	0.240757	0.00398172	0.0511305	0.326338
CG9934	trough	24	4	20	-0.0296037	1.00134	1.8349	-2.98764	4.82254	-0.614162	-1.05479	0.240281	0.00398172	0.0511305	0.326338
CG5946	trough	24	12	12	1.75439e-08	1	1.68842	-2.78564	4.47406	-0.606115	-1.4966	0.240212	0.00398172	0.0511305	0.326338
CG6841	trough	24	16	4	-1.16866e-17	1	1.88056	-2.54994	4.43051	-0.737491	-1.03128	0.24037	0.00398172	0.0511305	0.326338
Rab14	trough	24	4	20	-3.50877e-08	1	2.24744	-3.09616	5.3436	-0.725878	-1.19972	0.240281	0.00398172	0.0511305	0.326338
Spase25	trough	24	12	4	1.75439e-08	1	1.55404	-3.2968	4.85085	-0.471379	-1.70432	0.240212	0.00398172	0.0511305	0.326338
CG15065	trough	24	12	4	-7.01754e-08	1	2.23918	-2.12212	4.3613	-1.05516	-1.19168	0.240212	0.00398172	0.0511305	0.326338
CG4538	trough	24	16	20	-1.38778e-17	1	2.41324	-2.11128	4.52452	-1.14302	-1.21031	0.24037	0.00398172	0.0511305	0.326338
Reg-5	trough	24	20	4	-7.01754e-08	1	1.88221	-2.776	4.65822	-0.67803	-1.46252	0.240212	0.00398172	0.0511305	0.326338
CG12107	trough	24	20	20	-0.00555584	0.986515	2.30596	-2.18835	4.49431	-1.05375	-0.777805	0.240932	0.00398172	0.0511305	0.326338
Tsf1	trough	24	16	12	-3.89552e-18	1	2.26554	-2.00871	4.27425	-1.12786	-0.734255	0.24037	0.00398172	0.0511305	0.326338
CG7988	trough	24	0	12	0.0258571	0.986392	1.67519	-3.03731	4.7125	-0.551537	-1.39268	0.240757	0.00398172	0.0511305	0.326338
vsg	trough	24	20	12	1.75439e-08	1	2.64268	-2.51631	5.15899	-1.05022	-0.998176	0.240932	0.00398172	0.0511305	0.326338
Cpr78Cc	trough	24	0	20	-5.26316e-08	1	1.7703	-2.87928	4.64958	-0.61484	-1.25366	0.240757	0.00398172	0.0511305	0.326338
CG3884	trough	24	12	4	0	1	1.89606	-3.34314	5.2392	-0.56715	-1.36013	0.240212	0.00398172	0.0511305	0.326338
CG14042	trough	24	12	4	0.0964755	1.05205	2.16175	-2.53965	4.7014	-0.851199	-2.32124	0.240212	0.00398172	0.0511305	0.326338
CG11306	trough	24	12	12	-1.75439e-08	1	1.82464	-2.48404	4.30868	-0.734545	-1.91481	0.240212	0.00398172	0.0511305	0.326338
CG6208	trough	24	4	12	-0.0220997	1.00525	1.40863	-2.44988	3.85851	-0.574981	-1.37401	0.240281	0.00398172	0.0511305	0.326338
CG31120	trough	24	16	4	0.00880681	0.98771	1.97303	-2.86951	4.84255	-0.687584	-1.26912	0.24037	0.00398172	0.0511305	0.326338
csul	trough	24	8	20	-0.000135878	0.984783	1.81555	-2.24742	4.06297	-0.807839	-0.970122	0.24109	0.00398172	0.0511305	0.326338
ifc	trough	24	20	4	-5.26316e-08	1	1.97834	-2.22588	4.20422	-0.88879	-0.689151	0.240212	0.00398172	0.0511305	0.326338
CG15602	trough	24	16	20	-3.50877e-08	1	1.8781	-2.90596	4.78406	-0.646294	-1.53068	0.24037	0.00398172	0.0511305	0.326338
Or85f	trough	24	0	20	0.0758282	0.986804	2.25186	-2.15415	4.406	-1.04536	-1.73255	0.240757	0.00398172	0.0511305	0.326338
CG17996	trough	24	16	20	-0.00706814	0.985709	1.89616	-2.31072	4.20687	-0.820592	-1.12315	0.24037	0.00398172	0.0511305	0.326338
yellow-h	trough	24	8	20	-1.75439e-08	1	1.80547	-2.29501	4.10047	-0.786693	-1.4185	0.24109	0.00398172	0.0511305	0.326338
CG11658	trough	24	20	20	-0.000273116	0.976693	1.87374	-2.67741	4.55116	-0.699834	-0.915742	0.240932	0.00398172	0.0511305	0.326338
dia	trough	24	8	4	0	1	2.93438	-1.8703	4.80467	-1.56894	-1.15354	0.24109	0.00398172	0.0511305	0.326338
Vm26Ab	trough	24	0	12	5.26316e-08	1	2.6729	-1.53984	4.21274	-1.73583	-1.27607	0.240757	0.00398172	0.0511305	0.326338
Cct5	trough	24	12	12	-1.75439e-08	1	3.23161	-2.11669	5.34829	-1.52673	-0.955445	0.238931	0.00415213	0.0529205	0.330957
U2af50	trough	24	20	12	-7.79104e-18	1	2.0182	-2.45846	4.47666	-0.820918	-1.47841	0.23965	0.00415213	0.0529205	0.330957
Hsp67Bc	trough	24	0	12	-0.0337259	1.02463	2.04439	-2.22355	4.26794	-0.919427	-1.02979	0.23947	0.00415213	0.0529205	0.330957
CG4554	trough	24	0	12	-0.0683263	0.988435	1.70777	-2.50132	4.20909	-0.682746	-0.868746	0.23947	0.00415213	0.0529205	0.330957
lin	trough	24	12	12	0.0218166	1.00454	2.14928	-1.98648	4.13576	-1.08196	-1.27768	0.238931	0.00415213	0.0529205	0.330957
CG13937	trough	24	4	4	-1.75439e-08	1	1.8764	-2.32972	4.20612	-0.805416	-0.835025	0.238996	0.00415213	0.0529205	0.330957
CG11741	trough	24	20	4	5.26316e-08	1	1.98229	-2.64271	4.62499	-0.750096	-1.25526	0.238931	0.00415213	0.0529205	0.330957
CG10822	trough	24	8	20	-0.159761	0.900724	1.59686	-2.27392	3.87078	-0.702248	-0.788349	0.239807	0.00415213	0.0529205	0.330957
Xe7	trough	24	12	12	-3.50877e-08	1	1.59371	-3.1447	4.73841	-0.506792	-1.03773	0.238931	0.00415213	0.0529205	0.330957
Dgp-1	trough	24	8	20	3.50877e-08	1	3.09722	-2.24189	5.3391	-1.38152	-0.846644	0.239807	0.00415213	0.0529205	0.330957
KrT95D	trough	24	16	4	0.01075	0.994448	2.19677	-2.47758	4.67435	-0.886658	-1.426	0.239088	0.00415213	0.0529205	0.330957
CG1444	trough	24	4	20	-7.01754e-08	1	1.88112	-2.30391	4.18503	-0.816488	-1.50447	0.238996	0.00415213	0.0529205	0.330957
CG5385	trough	24	8	20	-1.75439e-08	1	1.89771	-1.93956	3.83727	-0.978427	-1.22416	0.239807	0.00415213	0.0529205	0.330957
ALiX	trough	24	4	20	1.75439e-08	1	1.72618	-3.03563	4.76181	-0.568642	-1.34169	0.238996	0.00415213	0.0529205	0.330957
row	trough	24	16	4	-7.01754e-08	1	1.51688	-2.55752	4.0744	-0.593108	-1.33426	0.239088	0.00415213	0.0529205	0.330957
CR18217	trough	24	4	4	0.0390906	0.95647	1.41766	-2.61664	4.0343	-0.541788	-2.10534	0.238996	0.00415213	0.0529205	0.330957
CG5150	trough	24	0	4	0.0340569	0.93604	2.00914	-2.33467	4.34381	-0.860569	-1.01393	0.23947	0.00415213	0.0529205	0.330957
mod(mdg4)	trough	24	4	20	-0.000211956	0.952934	1.41234	-2.55634	3.96868	-0.552485	-1.56255	0.238996	0.00415213	0.0529205	0.330957
CG14891	trough	24	12	20	-0.00554763	1.09473	2.00339	-2.89638	4.89978	-0.691688	-1.10433	0.238931	0.00415213	0.0529205	0.330957
glob3	trough	24	0	4	0.0272259	1.00108	2.26081	-3.9011	6.1619	-0.579531	-1.5252	0.23947	0.00415213	0.0529205	0.330957
PsGEF	trough	24	0	4	0.0103677	1.00927	1.84894	-2.41883	4.26777	-0.764393	-1.11966	0.23947	0.00415213	0.0529205	0.330957
CG7852	trough	24	4	4	0.166293	1.02809	2.01187	-2.64789	4.65976	-0.7598	-2.96569	0.238996	0.00415213	0.0529205	0.330957
CG10395	trough	24	20	4	-7.01754e-08	1	1.52283	-2.46415	3.98698	-0.617995	-1.00318	0.238931	0.00415213	0.0529205	0.330957
HtrA2	trough	24	0	4	1.75439e-08	1	1.82557	-2.0919	3.91747	-0.872686	-1.27656	0.23947	0.00415213	0.0529205	0.330957
CG11671	trough	24	0	4	-1.36343e-17	1	2.01413	-2.37647	4.3906	-0.847531	-1.27457	0.23947	0.00415213	0.0529205	0.330957
CG9996	trough	24	20	4	0.00672768	0.956922	2.29871	-2.18503	4.48374	-1.05203	-1.12389	0.238931	0.00415213	0.0529205	0.330957
CG1265	trough	24	0	12	-3.89552e-18	1	2.04709	-4.28463	6.33172	-0.477775	-2.10972	0.23947	0.00415213	0.0529205	0.330957
MRP	trough	24	4	20	1.75439e-08	1	1.9335	-2.34473	4.27823	-0.824614	-1.24716	0.238996	0.00415213	0.0529205	0.330957
CG7611	trough	24	20	4	3.50877e-08	1	1.45867	-2.94781	4.40647	-0.494831	-1.34966	0.238931	0.00415213	0.0529205	0.330957
CG6357	trough	24	16	20	-1.75439e-08	1	2.3472	-2.30717	4.65437	-1.01735	-1.19791	0.239088	0.00415213	0.0529205	0.330957
slo	trough	24	12	12	-0.00407713	0.967312	2.30498	-2.56461	4.86959	-0.898761	-1.1743	0.23765	0.00432897	0.0550705	0.338716
Tango4	trough	24	0	4	0.0206755	0.967842	1.7145	-2.36251	4.07701	-0.725712	-1.36723	0.238182	0.00432897	0.0550705	0.338716
CG10943	trough	24	0	4	-0.0252644	0.982601	1.39772	-2.32368	3.7214	-0.601513	-1.09315	0.238182	0.00432897	0.0550705	0.338716
CG9485	trough	24	4	20	3.50877e-08	1	1.95701	-2.35469	4.31171	-0.831111	-1.34659	0.237711	0.00432897	0.0550705	0.338716
l(2)37Ce	trough	24	4	4	-0.0309526	0.999471	2.15721	-2.59511	4.75232	-0.831262	-1.13604	0.237711	0.00432897	0.0550705	0.338716
Ge-1	trough	24	12	12	2.72686e-17	1	3.00174	-2.27766	5.2794	-1.3179	-1.14811	0.23765	0.00432897	0.0550705	0.338716
Papss	trough	24	20	20	-3.50877e-08	1	2.16304	-2.55879	4.72183	-0.845339	-1.19635	0.238369	0.00432897	0.0550705	0.338716
Rab1	trough	24	8	20	3.50877e-08	1	1.70058	-3.33242	5.033	-0.510312	-1.11071	0.238525	0.00432897	0.0550705	0.338716
GlyP	trough	24	8	12	1.80168e-17	1	1.55825	-2.76017	4.31842	-0.564549	-1.06678	0.238525	0.00432897	0.0550705	0.338716
CG5404	trough	24	8	4	-0.0871813	0.982987	1.70387	-2.76428	4.46815	-0.61639	-1.00183	0.238525	0.00432897	0.0550705	0.338716
CG11226	trough	24	0	4	0.0826679	1.03062	2.23766	-2.49213	4.7298	-0.89789	-1.39072	0.238182	0.00432897	0.0550705	0.338716
Rab35	trough	24	16	4	-1.75439e-08	1	2.46717	-2.14366	4.61084	-1.15091	-0.963332	0.237806	0.00432897	0.0550705	0.338716
CG17721	trough	24	16	4	-0.0756607	0.988158	1.3595	-3.41137	4.77087	-0.398521	-1.01558	0.237806	0.00432897	0.0550705	0.338716
CG9826	trough	24	12	4	0.02842	0.943965	2.086	-2.10336	4.18936	-0.991745	-1.15187	0.23765	0.00432897	0.0550705	0.338716
CG17739	trough	24	4	20	-3.50877e-08	1	2.22771	-2.89627	5.12398	-0.769166	-1.81302	0.237711	0.00432897	0.0550705	0.338716
mspo	trough	24	8	12	-0.0491757	1.0573	2.31515	-2.80301	5.11816	-0.825949	-0.916613	0.238525	0.00432897	0.0550705	0.338716
betaTry	trough	24	0	4	0.011261	1.08113	1.93469	-2.49498	4.42967	-0.77543	-1.04165	0.238182	0.00432897	0.0550705	0.338716
CG3645	trough	24	4	12	-0.00117744	0.991228	1.61905	-2.3231	3.94215	-0.696934	-1.43698	0.237711	0.00432897	0.0550705	0.338716
CG9471	trough	24	0	12	-0.0313339	0.988639	1.48672	-3.31939	4.80611	-0.447888	-1.53899	0.238182	0.00432897	0.0550705	0.338716
CG4908	trough	24	20	4	0.0188713	1.0012	1.61304	-2.84315	4.45619	-0.567341	-1.30828	0.23765	0.00432897	0.0550705	0.338716
CG31792	trough	24	4	20	-0.0107697	1.00501	1.70135	-2.89096	4.59231	-0.588507	-1.41091	0.237711	0.00432897	0.0550705	0.338716
side	trough	24	12	4	0.0343178	1.02392	2.26225	-3.07389	5.33614	-0.735955	-1.22474	0.23765	0.00432897	0.0550705	0.338716
CG31883	trough	24	0	4	0.0121276	0.982251	2.05941	-3.0427	5.10211	-0.676836	-1.31599	0.238182	0.00432897	0.0550705	0.338716
Fs	trough	24	4	20	-0.00245551	0.966342	1.95913	-2.52428	4.48341	-0.776113	-2.14973	0.237711	0.00432897	0.0550705	0.338716
cer	trough	24	20	4	-0.0147208	0.997292	1.70247	-2.80653	4.509	-0.606609	-1.36348	0.23765	0.00432897	0.0550705	0.338716
kel	trough	24	20	4	3.50877e-08	1	2.00548	-1.6907	3.69618	-1.18619	-1.08471	0.236369	0.00451245	0.0570305	0.343511
CG18609	trough	24	20	12	-0.0792387	0.997807	2.50687	-2.58921	5.09608	-0.968199	-0.860569	0.237087	0.00451245	0.0570305	0.343511
CG13738	trough	24	4	20	-0.0042732	0.991705	1.89396	-3.01183	4.90579	-0.628839	-1.27373	0.236426	0.00451245	0.0570305	0.343511
CG2970	trough	24	8	20	1.75439e-08	1	1.71989	-2.6064	4.32629	-0.659874	-1.30783	0.237243	0.00451245	0.0570305	0.343511
CG15366	trough	24	20	12	0.0146908	0.969042	1.43163	-2.74727	4.1789	-0.521111	-1.48302	0.237087	0.00451245	0.0570305	0.343511
ush	trough	24	12	12	0.0289468	0.986133	2.10107	-2.90291	5.00397	-0.72378	-1.70412	0.236369	0.00451245	0.0570305	0.343511
CG9669	trough	24	4	20	-1.75439e-08	1	2.17797	-2.36525	4.54322	-0.920821	-1.01396	0.236426	0.00451245	0.0570305	0.343511
CG7920	trough	24	20	20	-5.26316e-08	1	2.12955	-3.2145	5.34404	-0.662482	-0.919286	0.237087	0.00451245	0.0570305	0.343511
CG10570	trough	24	4	20	1.75439e-08	1	1.98984	-2.00572	3.99556	-0.992083	-0.968072	0.236426	0.00451245	0.0570305	0.343511
CG3534	trough	24	8	12	3.50877e-08	1	1.69447	-2.85207	4.54654	-0.594121	-0.937083	0.237243	0.00451245	0.0570305	0.343511
CG10673	trough	24	16	4	-0.0298703	0.971927	1.90154	-2.61909	4.52063	-0.726033	-0.849256	0.236524	0.00451245	0.0570305	0.343511
CG18327	trough	24	16	4	-1.75439e-08	1	2.00942	-1.60396	3.61338	-1.25279	-0.590602	0.236524	0.00451245	0.0570305	0.343511
beta-Spec	trough	24	4	20	-5.26316e-08	1	2.96349	-3.56799	6.53148	-0.830577	-0.945561	0.236426	0.00451245	0.0570305	0.343511
CG4049	trough	24	0	20	7.01754e-08	1	1.51251	-2.73464	4.24715	-0.553093	-1.79093	0.236895	0.00451245	0.0570305	0.343511
CG5938	trough	24	8	20	1.75439e-08	1	2.34663	-2.13382	4.48046	-1.09973	-0.948063	0.237243	0.00451245	0.0570305	0.343511
CG12848	trough	24	20	12	8.77193e-08	1	1.47177	-2.5062	3.97797	-0.587252	-2.36589	0.237087	0.00451245	0.0570305	0.343511
Axn	trough	24	12	4	-3.50877e-08	1	2.66856	-2.86186	5.53042	-0.932456	-1.16506	0.236369	0.00451245	0.0570305	0.343511
CG17217	trough	24	16	12	0.0868196	0.955743	1.69228	-2.73198	4.42426	-0.619435	-1.63783	0.236524	0.00451245	0.0570305	0.343511
dah	trough	24	0	20	0.0165097	0.943206	1.96944	-1.93037	3.89981	-1.02024	-1.1219	0.236895	0.00451245	0.0570305	0.343511
GRHR	trough	24	8	20	1.75439e-08	1	2.25748	-2.97867	5.23615	-0.757883	-1.10159	0.237243	0.00451245	0.0570305	0.343511
glec	trough	24	20	12	-5.26316e-08	1	2.16654	-1.93524	4.10179	-1.11952	-0.974897	0.237087	0.00451245	0.0570305	0.343511
Ggamma30A	trough	24	4	20	1.75439e-08	1	2.30405	-3.0804	5.38445	-0.747974	-1.78505	0.236426	0.00451245	0.0570305	0.343511
CG1077	trough	24	0	20	0.036621	1.00673	2.43562	-3.32824	5.76386	-0.731803	-1.75408	0.236895	0.00451245	0.0570305	0.343511
CG3610	trough	24	0	4	0.0196237	1.00201	1.5775	-2.50576	4.08326	-0.629551	-1.02321	0.236895	0.00451245	0.0570305	0.343511
CG13551	trough	24	12	4	-4.8694e-19	1	3.81998	-2.02554	5.84552	-1.88591	-1.01239	0.236369	0.00451245	0.0570305	0.343511
CG9231	trough	24	20	4	-0.0727563	1.038	1.86082	-2.48311	4.34393	-0.749389	-0.84001	0.236369	0.00451245	0.0570305	0.343511
CG31109	trough	24	0	4	0.0619485	1.00775	1.80793	-2.60625	4.41417	-0.693689	-1.48561	0.236895	0.00451245	0.0570305	0.343511
JhI-21	trough	24	20	4	7.79104e-18	1	2.10684	-1.97725	4.08409	-1.06554	-1.08118	0.236369	0.00451245	0.0570305	0.343511
CG11899	trough	24	8	20	-5.26316e-08	1	2.01628	-2.86387	4.88016	-0.704041	-1.11647	0.237243	0.00451245	0.0570305	0.343511
CG17002	trough	24	20	4	-1.75439e-08	1	2.24005	-2.78116	5.02121	-0.805439	-1.2159	0.236369	0.00451245	0.0570305	0.343511
Oatp30B	trough	24	20	12	-1.75439e-08	1	2.02291	-2.2216	4.24452	-0.910563	-1.04542	0.237087	0.00451245	0.0570305	0.343511
bsf	trough	24	20	12	0.0114861	0.994909	1.89036	-3.61878	5.50915	-0.522374	-1.39054	0.237087	0.00451245	0.0570305	0.343511
CG42329	trough	24	4	4	0.0117974	0.990531	1.55934	-2.54085	4.10019	-0.613707	-1.66856	0.235141	0.00470276	0.0590205	0.349173
Pros28.1	trough	24	12	4	3.50877e-08	1	2.10817	-2.20608	4.31424	-0.955618	-0.863382	0.235088	0.00470276	0.0590205	0.349173
CG4098	trough	24	20	12	0.00802573	0.993007	1.60785	-2.24528	3.85313	-0.7161	-1.18039	0.235806	0.00470276	0.0590205	0.349173
Set	trough	24	12	12	-1.25387e-17	1	1.71918	-2.76013	4.47931	-0.622864	-1.06686	0.235088	0.00470276	0.0590205	0.349173
CG12207	trough	24	20	4	1.75439e-08	1	2.07962	-2.28752	4.36714	-0.909116	-0.830216	0.235088	0.00470276	0.0590205	0.349173
CG11961	trough	24	12	12	1.75439e-08	1	1.59743	-2.45047	4.0479	-0.651886	-1.20875	0.235088	0.00470276	0.0590205	0.349173
ACXE	trough	24	16	4	-0.0344191	1.13485	2.64622	-2.40875	5.05496	-1.09859	-0.822463	0.235242	0.00470276	0.0590205	0.349173
Syx18	trough	24	4	20	8.77193e-08	1	2.82521	-2.35673	5.18195	-1.19878	-1.22459	0.235141	0.00470276	0.0590205	0.349173
CG4691	trough	24	0	4	0.184904	1.07821	3.50083	-2.39672	5.89755	-1.46068	-1.71757	0.235607	0.00470276	0.0590205	0.349173
l(2)k09913	trough	24	4	20	-3.50877e-08	1	2.10458	-2.05911	4.16369	-1.02208	-1.29423	0.235141	0.00470276	0.0590205	0.349173
CG7927	trough	24	16	12	-3.50877e-08	1	1.65038	-2.36506	4.01544	-0.697819	-1.18994	0.235242	0.00470276	0.0590205	0.349173
Atg4	trough	24	0	20	1.75439e-08	1	2.24768	-2.51582	4.7635	-0.89342	-2.0089	0.235607	0.00470276	0.0590205	0.349173
prom	trough	24	16	20	-0.00372728	0.969762	2.42557	-2.26659	4.69216	-1.07014	-1.01893	0.235242	0.00470276	0.0590205	0.349173
CG1972	trough	24	12	12	2.33731e-17	1	2.41062	-2.89292	5.30354	-0.833283	-1.27261	0.235088	0.00470276	0.0590205	0.349173
CG17650	trough	24	4	4	0.0415629	1.03884	2.36908	-3.14526	5.51434	-0.753224	-1.72198	0.235141	0.00470276	0.0590205	0.349173
ato	trough	24	8	20	-5.26316e-08	1	2.46487	-2.4961	4.96098	-0.98749	-1.03313	0.23596	0.00470276	0.0590205	0.349173
Rhp	trough	24	0	12	0.0627306	0.970745	1.73829	-2.38899	4.12728	-0.727625	-2.14139	0.235607	0.00470276	0.0590205	0.349173
Taf10b	trough	24	4	20	-0.0217219	0.943712	1.48145	-2.43337	3.91481	-0.608806	-1.15083	0.235141	0.00470276	0.0590205	0.349173
Pvr	trough	24	16	4	-0.0378734	1.00398	1.79057	-2.18066	3.97124	-0.821114	-1.29642	0.235242	0.00470276	0.0590205	0.349173
CG14641	trough	24	8	4	-1.75439e-08	1	2.08176	-2.937	5.01876	-0.708804	-1.13283	0.23596	0.00470276	0.0590205	0.349173
aub	trough	24	4	12	0.0387118	1.01964	2.08103	-2.49897	4.58001	-0.832755	-1.27885	0.235141	0.00470276	0.0590205	0.349173
CG10494	trough	24	16	20	5.26316e-08	1	1.94589	-2.32329	4.26917	-0.837558	-1.08326	0.235242	0.00470276	0.0590205	0.349173
CkIIbeta	trough	24	20	20	-0.0522659	1.00439	1.7953	-2.11932	3.91462	-0.84711	-0.891082	0.235806	0.00470276	0.0590205	0.349173
bif	trough	24	16	20	-5.84328e-18	1	2.16079	-2.61024	4.77103	-0.827816	-0.914879	0.235242	0.00470276	0.0590205	0.349173
CG34261	trough	24	0	4	-0.184971	1.00153	1.45876	-2.59711	4.05587	-0.561685	-0.800076	0.235607	0.00470276	0.0590205	0.349173
osp	trough	24	16	20	-7.01754e-08	1	1.50087	-3.43975	4.94062	-0.43633	-1.81246	0.235242	0.00470276	0.0590205	0.349173
CG10359	trough	24	0	12	-1.75439e-08	1	2.48993	-4.16533	6.65526	-0.597775	-1.85706	0.235607	0.00470276	0.0590205	0.349173
Sps2	trough	24	20	4	3.50877e-08	1	1.76715	-3.43358	5.20073	-0.514666	-1.19265	0.235088	0.00470276	0.0590205	0.349173
jim	trough	24	12	12	-3.50877e-08	1	2.17893	-1.99211	4.17103	-1.09378	-1.32205	0.233807	0.00490013	0.0610405	0.353928
YL-1	trough	24	0	4	-0.0194533	0.993539	1.86254	-2.7485	4.61104	-0.677654	-1.00968	0.23432	0.00490013	0.0610405	0.353928
dco	trough	24	4	20	-3.89552e-18	1	2.39583	-1.76763	4.16347	-1.35539	-1.05348	0.233856	0.00490013	0.0610405	0.353928
CG10505	trough	24	8	20	-1.75439e-08	1	1.82101	-2.5875	4.4085	-0.703772	-1.25277	0.234678	0.00490013	0.0610405	0.353928
CG17293	trough	24	4	20	-7.01754e-08	1	1.78877	-3.44759	5.23636	-0.518848	-1.47657	0.233856	0.00490013	0.0610405	0.353928
CG10920	trough	24	8	20	-1.75439e-08	1	3.07114	-2.8835	5.95465	-1.06507	-1.24245	0.234678	0.00490013	0.0610405	0.353928
orb2	trough	24	8	12	-1.55821e-17	1	1.61027	-2.80801	4.41828	-0.573456	-1.59444	0.234678	0.00490013	0.0610405	0.353928
CG12796	trough	24	0	4	0.00219392	0.97028	1.86605	-2.19433	4.06038	-0.850398	-1.32723	0.23432	0.00490013	0.0610405	0.353928
agt	trough	24	20	12	0.00642541	0.992355	1.90365	-2.32715	4.23081	-0.818018	-1.25764	0.234524	0.00490013	0.0610405	0.353928
Alas	trough	24	0	4	3.11642e-17	1	2.11438	-2.12293	4.23731	-0.995973	-1.03519	0.23432	0.00490013	0.0610405	0.353928
CG8258	trough	24	4	12	-1.75439e-08	1	2.04917	-3.39769	5.44686	-0.603109	-1.23229	0.233856	0.00490013	0.0610405	0.353928
Ost48	trough	24	12	12	1.75439e-08	1	1.87416	-2.26703	4.14119	-0.826704	-1.1809	0.233807	0.00490013	0.0610405	0.353928
IM3	trough	24	8	12	-3.50877e-08	1	1.80148	-2.05614	3.85762	-0.876144	-0.982368	0.234678	0.00490013	0.0610405	0.353928
Sop2	trough	24	12	12	0.0184661	0.985972	1.89077	-2.85224	4.74301	-0.662907	-1.53264	0.233807	0.00490013	0.0610405	0.353928
Set2	trough	24	16	4	0.012222	0.9954	1.28701	-3.10526	4.39227	-0.414462	-2.47315	0.23396	0.00490013	0.0610405	0.353928
mmy	trough	24	0	20	1.21735e-17	1	2.43804	-2.02601	4.46404	-1.20337	-1.32212	0.23432	0.00490013	0.0610405	0.353928
CG8494	trough	24	12	20	-0.0574464	1.06516	1.86014	-2.76223	4.62237	-0.673418	-0.909782	0.233807	0.00490013	0.0610405	0.353928
O-fut2	trough	24	12	4	1.75439e-08	1	1.99047	-2.19486	4.18533	-0.90688	-1.07948	0.233807	0.00490013	0.0610405	0.353928
Bet5	trough	24	16	20	1.75439e-08	1	1.88308	-2.39186	4.27494	-0.787287	-0.91208	0.23396	0.00490013	0.0610405	0.353928
Or7a	trough	24	0	20	-0.0219398	1.00469	2.93876	-1.9428	4.88156	-1.51264	-0.77651	0.23432	0.00490013	0.0610405	0.353928
CG13144	trough	24	16	12	0.0135481	0.984867	1.33567	-3.40195	4.73762	-0.392619	-2.04073	0.23396	0.00490013	0.0610405	0.353928
Ca-alpha1T	trough	24	0	4	0.103499	1.02984	2.80931	-2.68375	5.49306	-1.04679	-1.33446	0.23432	0.00490013	0.0610405	0.353928
Syx17	trough	24	16	20	0.0227553	0.977639	1.62222	-2.60344	4.22567	-0.623106	-1.4271	0.23396	0.00490013	0.0610405	0.353928
CG5959	trough	24	16	20	-0.0635681	0.986573	1.33144	-2.68233	4.01377	-0.496376	-1.31641	0.23396	0.00490013	0.0610405	0.353928
CG12817	trough	24	20	12	-1.75439e-08	1	1.70894	-3.85087	5.55981	-0.44378	-1.45116	0.234524	0.00490013	0.0610405	0.353928
CG13051	trough	24	4	4	-1.75439e-08	1	1.82283	-2.42721	4.25005	-0.750998	-1.22148	0.233856	0.00490013	0.0610405	0.353928
CG14062	trough	24	0	20	-1.55821e-17	1	2.59869	-2.21726	4.81595	-1.17203	-1.01395	0.23432	0.00490013	0.0610405	0.353928
Dad	trough	24	8	4	3.50877e-08	1	1.78793	-3.2146	5.00254	-0.556191	-1.4928	0.234678	0.00490013	0.0610405	0.353928
CG3726	trough	24	20	12	1.75439e-08	1	1.95854	-2.47341	4.43196	-0.791839	-1.22956	0.234524	0.00490013	0.0610405	0.353928
eEF1delta	trough	24	0	4	-1.75439e-08	1	2.75537	-1.69328	4.44864	-1.62724	-0.777428	0.23432	0.00490013	0.0610405	0.353928
CG31915	trough	24	20	4	-0.00473336	0.973778	1.96741	-3.40115	5.36855	-0.578454	-1.83529	0.233807	0.00490013	0.0610405	0.353928
ry	trough	24	20	12	0.00318399	0.985824	2.82559	-2.61517	5.44076	-1.08046	-1.06268	0.234524	0.00490013	0.0610405	0.353928
CG14119	trough	24	20	4	9.25186e-18	1	2.05543	-2.54141	4.59684	-0.808777	-1.41201	0.232526	0.00510478	0.0633505	0.359269
CG15579	trough	24	8	20	-0.00819657	0.987977	2.14026	-1.97752	4.11777	-1.08229	-1.19974	0.233395	0.00510478	0.0633505	0.359269
CG3918	trough	24	12	12	3.50877e-08	1	1.60619	-2.84646	4.45264	-0.564276	-1.51439	0.232526	0.00510478	0.0633505	0.359269
CG15556	trough	24	4	20	-3.50877e-08	1	1.98055	-2.63712	4.61767	-0.751026	-1.9923	0.232571	0.00510478	0.0633505	0.359269
l(2)35Di	trough	24	0	4	-1.75439e-08	1	4.1617	-2.14983	6.31153	-1.93583	-0.791385	0.233032	0.00510478	0.0633505	0.359269
Hsp60B	trough	24	0	4	0.102179	1.00976	2.00023	-2.10605	4.10628	-0.949757	-2.01257	0.233032	0.00510478	0.0633505	0.359269
CG8745	trough	24	4	20	1.55821e-17	1	1.53582	-2.79662	4.33243	-0.549169	-1.7231	0.232571	0.00510478	0.0633505	0.359269
CG9257	trough	24	16	12	0.0867224	1.09255	2.79934	-2.12586	4.9252	-1.31681	-1.99133	0.232678	0.00510478	0.0633505	0.359269
CG4576	trough	24	0	20	0.0464293	1.05032	2.64647	-2.5979	5.24437	-1.01869	-1.14984	0.233032	0.00510478	0.0633505	0.359269
CG14654	trough	24	16	4	0.0679846	0.984609	2.60425	-2.20764	4.8119	-1.17965	-1.7016	0.232678	0.00510478	0.0633505	0.359269
CG9090	trough	24	0	4	-7.01754e-08	1	2.07444	-2.04056	4.11501	-1.0166	-0.981602	0.233032	0.00510478	0.0633505	0.359269
Obp99c	trough	24	8	12	8.77193e-08	1	1.98714	-2.32249	4.30963	-0.855606	-0.983237	0.233395	0.00510478	0.0633505	0.359269
CG5877	trough	24	12	12	-0.0461065	1.02201	1.83337	-3.34309	5.17645	-0.548405	-1.46716	0.232526	0.00510478	0.0633505	0.359269
e(y)1	trough	24	8	20	3.50877e-08	1	1.81417	-2.61638	4.43054	-0.693388	-1.20981	0.233395	0.00510478	0.0633505	0.359269
RpL30	trough	24	4	12	3.50877e-08	1	1.73677	-3.10487	4.84164	-0.55937	-1.9078	0.232571	0.00510478	0.0633505	0.359269
Cg25C	trough	24	20	4	-3.50877e-08	1	2.16892	-2.88588	5.0548	-0.751561	-1.28719	0.232526	0.00510478	0.0633505	0.359269
CG13084	trough	24	16	4	-0.0573236	0.995574	2.36082	-3.06303	5.42385	-0.770749	-1.03878	0.232678	0.00510478	0.0633505	0.359269
CG11388	trough	24	4	4	6.81716e-18	1	1.4034	-2.84207	4.24547	-0.493796	-1.23826	0.232571	0.00510478	0.0633505	0.359269
Syx5	trough	24	8	12	-7.01754e-08	1	2.23972	-2.41906	4.65878	-0.925867	-1.35506	0.233395	0.00510478	0.0633505	0.359269
CG34430	trough	24	8	12	0.145205	0.896669	1.86647	-2.6553	4.52177	-0.702924	-4.01379	0.233395	0.00510478	0.0633505	0.359269
Acp26Aa	trough	24	0	4	-0.081365	1.02173	1.48157	-2.83241	4.31398	-0.523076	-0.94036	0.233032	0.00510478	0.0633505	0.359269
mRpL44	trough	24	20	12	-1.75439e-08	1	1.62492	-2.74785	4.37277	-0.591342	-1.06324	0.233242	0.00510478	0.0633505	0.359269
CG3621	trough	24	0	4	1.75439e-08	1	2.17137	-2.15642	4.32778	-1.00693	-1.10506	0.233032	0.00510478	0.0633505	0.359269
CG8920	trough	24	4	20	1.75439e-08	1	1.91123	-2.53777	4.449	-0.753113	-1.30683	0.232571	0.00510478	0.0633505	0.359269
CG6199	trough	24	4	20	0.00498704	1.00035	1.54347	-2.39165	3.93512	-0.645356	-1.38835	0.232571	0.00510478	0.0633505	0.359269
eIF2B-epsilon	trough	24	8	20	-0.0196125	0.990987	1.43067	-2.87128	4.30195	-0.49827	-1.5059	0.233395	0.00510478	0.0633505	0.359269
CG14606	trough	24	0	12	-0.0466579	1.02894	2.54102	-2.66865	5.20967	-0.952176	-1.28966	0.233032	0.00510478	0.0633505	0.359269
CG5056	trough	24	8	20	-0.0453417	1.04766	1.27383	-3.51403	4.78785	-0.362498	-0.999511	0.233395	0.00510478	0.0633505	0.359269
CG33229	trough	24	12	4	-1.75439e-08	1	1.93853	-2.29576	4.23429	-0.844394	-1.22284	0.232526	0.00510478	0.0633505	0.359269
CG3635	trough	24	12	20	0.00557778	0.979633	1.76633	-3.30837	5.0747	-0.533898	-1.36819	0.232526	0.00510478	0.0633505	0.359269
CG4080	trough	24	4	20	-3.50877e-08	1	1.48296	-3.86041	5.34337	-0.384145	-1.81365	0.232571	0.00510478	0.0633505	0.359269
CG7197	trough	24	20	4	-3.50877e-08	1	1.43139	-3.24189	4.67328	-0.441528	-1.32164	0.232526	0.00510478	0.0633505	0.359269
CG7185	trough	24	16	4	-1.75439e-08	1	2.82547	-2.31202	5.13749	-1.22208	-1.52574	0.232678	0.00510478	0.0633505	0.359269
CG14302	trough	24	4	12	0.0163016	1.00951	1.79505	-2.32852	4.12357	-0.770896	-1.25773	0.232571	0.00510478	0.0633505	0.359269
CG15908	trough	24	0	4	-1.75439e-08	1	1.83847	-2.23589	4.07435	-0.822254	-0.942815	0.233032	0.00510478	0.0633505	0.359269
Muc68D	trough	24	0	4	0.0848024	1.01802	2.49292	-2.43874	4.93165	-1.02222	-1.76208	0.233032	0.00510478	0.0633505	0.359269
ATP7	trough	24	4	20	-0.0152485	1.03255	2.24945	-2.27626	4.52571	-0.988221	-0.913345	0.231286	0.00531692	0.0656705	0.365744
LanA	trough	24	8	20	-3.50877e-08	1	2.10631	-2.0692	4.17551	-1.01793	-1.05073	0.232113	0.00531692	0.0656705	0.365744
Act79B	trough	24	0	4	5.26316e-08	1	2.74414	-2.71257	5.45672	-1.01164	-1.46852	0.231745	0.00531692	0.0656705	0.365744
repo	trough	24	16	4	-3.50877e-08	1	2.60968	-2.80909	5.41877	-0.929014	-0.962415	0.231396	0.00531692	0.0656705	0.365744
uif	trough	24	16	4	-3.50877e-08	1	1.77448	-2.36061	4.13509	-0.751703	-1.20754	0.231396	0.00531692	0.0656705	0.365744
CG1416	trough	24	4	20	3.50877e-08	1	2.13596	-2.2647	4.40066	-0.943154	-0.961827	0.231286	0.00531692	0.0656705	0.365744
CG6847	trough	24	8	4	-0.0320231	0.971087	1.48442	-2.93045	4.41487	-0.50655	-1.25692	0.232113	0.00531692	0.0656705	0.365744
CG8929	trough	24	20	4	-3.50877e-08	1	3.27066	-2.11836	5.38902	-1.54396	-1.12311	0.231244	0.00531692	0.0656705	0.365744
CG15057	trough	24	16	4	1.75439e-08	1	1.61716	-3.18077	4.79793	-0.508419	-1.13196	0.231396	0.00531692	0.0656705	0.365744
vap	trough	24	12	12	-5.26316e-08	1	1.71058	-2.71112	4.42169	-0.630948	-1.39602	0.231244	0.00531692	0.0656705	0.365744
Cdk4	trough	24	4	4	-0.00625464	0.992294	2.06023	-2.99488	5.05511	-0.687918	-0.894767	0.231286	0.00531692	0.0656705	0.365744
CG42247	trough	24	0	20	-0.0875722	1.02627	1.25301	-3.14191	4.39492	-0.398806	-0.916792	0.231745	0.00531692	0.0656705	0.365744
SNF1A	trough	24	4	20	1.75439e-08	1	3.09587	-1.99768	5.09355	-1.54973	-0.787657	0.231286	0.00531692	0.0656705	0.365744
ATPsyn-Cf6	trough	24	0	20	1.75439e-08	1	1.98142	-3.30544	5.28686	-0.599442	-1.24456	0.231745	0.00531692	0.0656705	0.365744
CG12128	trough	24	12	20	-0.0179318	0.991913	1.79288	-2.9232	4.71608	-0.613327	-1.46031	0.231244	0.00531692	0.0656705	0.365744
CG31690	trough	24	20	20	-3.50877e-08	1	1.70706	-1.86411	3.57117	-0.915748	-1.24044	0.231961	0.00531692	0.0656705	0.365744
CG10103	trough	24	8	12	-1.75439e-08	1	2.09529	-2.56595	4.66124	-0.816575	-1.06762	0.232113	0.00531692	0.0656705	0.365744
CG3706	trough	24	4	20	-0.029624	0.972837	1.49695	-2.899	4.39594	-0.516367	-1.67047	0.231286	0.00531692	0.0656705	0.365744
CG17300	trough	24	12	4	0.128355	1.05883	2.29217	-2.65632	4.94848	-0.862911	-1.48138	0.231244	0.00531692	0.0656705	0.365744
CG9740	trough	24	20	4	-0.0413971	0.979062	1.68384	-3.13798	4.82182	-0.536599	-2.55484	0.231244	0.00531692	0.0656705	0.365744
PGRP-SB2	trough	24	4	12	0.017167	0.986862	1.8044	-3.61828	5.42268	-0.49869	-3.27829	0.231286	0.00531692	0.0656705	0.365744
CG8693	trough	24	20	12	-0.0481551	0.997953	1.50346	-3.19935	4.70282	-0.469927	-1.40071	0.231961	0.00531692	0.0656705	0.365744
Cpr5C	trough	24	12	12	5.26316e-08	1	2.92028	-1.667	4.58727	-1.75182	-0.893751	0.231244	0.00531692	0.0656705	0.365744
DJ-1alpha	trough	24	4	12	-3.50877e-08	1	2.16988	-2.41802	4.5879	-0.89738	-1.03644	0.231286	0.00531692	0.0656705	0.365744
dpp	trough	24	0	12	-3.50877e-08	1	2.28945	-2.67354	4.96299	-0.856333	-1.4438	0.231745	0.00531692	0.0656705	0.365744
Dot	trough	24	20	20	-1.75439e-08	1	1.59802	-2.34083	3.93885	-0.682672	-1.3996	0.231961	0.00531692	0.0656705	0.365744
CG4730	trough	24	0	12	-0.0581325	0.953109	1.66045	-2.308	3.96845	-0.719429	-0.945803	0.231745	0.00531692	0.0656705	0.365744
nAcRalpha-80B	trough	24	4	4	0.00777508	0.986016	1.48086	-3.10505	4.58591	-0.47692	-1.54622	0.231286	0.00531692	0.0656705	0.365744
Gbeta13F	trough	24	8	12	1.75439e-08	1	2.26275	-1.8761	4.13886	-1.20609	-0.806745	0.232113	0.00531692	0.0656705	0.365744
Drak	trough	24	16	20	-5.26316e-08	1	1.69993	-2.93091	4.63084	-0.580001	-1.69926	0.231396	0.00531692	0.0656705	0.365744
Pros45	trough	24	8	20	-1.75439e-08	1	2.1913	-2.18808	4.37939	-1.00147	-0.968917	0.230831	0.00553679	0.0680605	0.372592
CG2063	trough	24	12	20	-3.50877e-08	1	1.89346	-2.44798	4.34144	-0.77348	-1.42807	0.229963	0.00553679	0.0680605	0.372592
CG14471	trough	24	8	12	1.94776e-17	1	2.17311	-2.05279	4.2259	-1.05861	-0.826814	0.230831	0.00553679	0.0680605	0.372592
CG1308	trough	24	16	20	0.144615	0.976269	1.63549	-2.28051	3.916	-0.717159	-1.554	0.230114	0.00553679	0.0680605	0.372592
timeout	trough	24	4	4	-1.75439e-08	1	1.96145	-2.16849	4.12994	-0.904522	-0.904616	0.230002	0.00553679	0.0680605	0.372592
Mst57Dc	trough	24	0	4	0.00252057	1.03468	2.20041	-1.75421	3.95462	-1.25436	-1.00933	0.230457	0.00553679	0.0680605	0.372592
cnn	trough	24	8	20	1.75439e-08	1	1.95294	-3.47369	5.42663	-0.562211	-1.56036	0.230831	0.00553679	0.0680605	0.372592
CG12025	trough	24	4	12	0.0013864	0.991244	1.82331	-2.49772	4.32103	-0.729991	-0.921776	0.230002	0.00553679	0.0680605	0.372592
CG12206	trough	24	16	12	-0.00331037	1.00416	1.66254	-3.20708	4.86963	-0.518397	-1.27593	0.230114	0.00553679	0.0680605	0.372592
CG6043	trough	24	20	12	-0.0210335	1.01917	1.51656	-2.38773	3.90429	-0.635149	-1.26959	0.230679	0.00553679	0.0680605	0.372592
CG32528	trough	24	0	12	-0.0427223	0.984377	1.31008	-2.53232	3.8424	-0.517342	-1.67465	0.230457	0.00553679	0.0680605	0.372592
CG4743	trough	24	4	4	0.0399969	1.00572	1.71186	-2.8418	4.55365	-0.602385	-2.12105	0.230002	0.00553679	0.0680605	0.372592
Jafrac2	trough	24	8	20	0.0212731	0.984244	1.70116	-2.66328	4.36444	-0.638746	-1.32069	0.230831	0.00553679	0.0680605	0.372592
mtacp1	trough	24	0	12	3.89552e-18	1	1.68668	-3.08396	4.77065	-0.54692	-1.24076	0.230457	0.00553679	0.0680605	0.372592
CG17189	trough	24	12	12	-3.50877e-08	1	1.53044	-3.25925	4.78969	-0.469567	-1.41345	0.229963	0.00553679	0.0680605	0.372592
CG30104	trough	24	0	4	0.0343816	0.963765	1.94476	-2.45678	4.40154	-0.791589	-2.87097	0.230457	0.00553679	0.0680605	0.372592
CG9459	trough	24	0	4	-3.50877e-08	1	2.07149	-2.09766	4.16915	-0.987524	-0.914104	0.230457	0.00553679	0.0680605	0.372592
CG9175	trough	24	16	4	0.0298042	0.983931	2.0793	-2.12306	4.20236	-0.979385	-1.41548	0.230114	0.00553679	0.0680605	0.372592
CG11669	trough	24	0	4	-0.0802367	1.02834	1.35624	-2.60991	3.96615	-0.519648	-1.2651	0.230457	0.00553679	0.0680605	0.372592
CG13298	trough	24	0	12	0.00950897	0.986463	1.35388	-2.59228	3.94616	-0.522275	-1.51936	0.230457	0.00553679	0.0680605	0.372592
Cpr78Ca	trough	24	12	4	0.0220265	0.950086	1.41987	-2.66604	4.08591	-0.532575	-2.20153	0.229963	0.00553679	0.0680605	0.372592
CG10562	trough	24	4	4	3.50877e-08	1	2.00937	-2.79985	4.80922	-0.717671	-1.4499	0.230002	0.00553679	0.0680605	0.372592
CG6579	trough	24	20	20	-1.75439e-08	1	2.17608	-2.28378	4.45986	-0.952843	-1.40952	0.230679	0.00553679	0.0680605	0.372592
CG5059	trough	24	20	4	-1.75439e-08	1	2.41982	-2.25538	4.6752	-1.07291	-1.00545	0.229963	0.00553679	0.0680605	0.372592
CG9894	trough	24	8	20	1.55821e-17	1	3.94592	-2.06123	6.00716	-1.91435	-0.962233	0.230831	0.00553679	0.0680605	0.372592
CG15514	trough	24	12	20	-0.0383126	1.0477	2.64163	-2.55569	5.19732	-1.03363	-0.877571	0.229963	0.00553679	0.0680605	0.372592
CG31689	trough	24	8	4	-1.75439e-08	1	1.74656	-1.97547	3.72202	-0.884124	-1.03705	0.230831	0.00553679	0.0680605	0.372592
Chi	trough	24	20	4	-0.00455508	0.98259	1.56936	-2.63757	4.20693	-0.595	-1.5769	0.229963	0.00553679	0.0680605	0.372592
CG5171	trough	24	4	4	3.50877e-08	1	1.88565	-2.4539	4.33954	-0.768428	-1.60449	0.230002	0.00553679	0.0680605	0.372592
sut3	trough	24	0	4	0.00183326	1.07321	1.9389	-2.50562	4.44452	-0.773818	-1.01211	0.22917	0.00576462	0.0708405	0.381751
Fhos	trough	24	0	4	1.55821e-17	1	2.1151	-1.98016	4.09527	-1.06815	-1.10532	0.22917	0.00576462	0.0708405	0.381751
cold	trough	24	8	20	-9.7388e-18	1	1.81831	-2.26509	4.0834	-0.802757	-1.1314	0.229548	0.00576462	0.0708405	0.381751
CG7945	trough	24	16	12	7.79104e-18	1	2.03956	-2.0636	4.10316	-0.988349	-1.26768	0.228832	0.00576462	0.0708405	0.381751
CG12644	trough	24	4	20	0.0487094	0.987742	1.63582	-2.73612	4.37194	-0.597863	-1.79079	0.228717	0.00576462	0.0708405	0.381751
CG14450	trough	24	4	4	1.75439e-08	1	2.05711	-3.88423	5.94135	-0.529606	-3.19475	0.228717	0.00576462	0.0708405	0.381751
CG13360	trough	24	4	12	-3.50877e-08	1	2.04597	-2.48808	4.53405	-0.822311	-1.0598	0.228717	0.00576462	0.0708405	0.381751
CG42336	trough	24	8	12	-1.75439e-08	1	2.24266	-3.27849	5.52115	-0.684053	-1.26161	0.229548	0.00576462	0.0708405	0.381751
CG42340	trough	24	16	4	-0.0169805	1.00461	2.11193	-3.08206	5.19399	-0.685234	-1.36563	0.228832	0.00576462	0.0708405	0.381751
CG5541	trough	24	4	12	5.84328e-18	1	1.80434	-3.03605	4.84039	-0.594307	-1.09207	0.228717	0.00576462	0.0708405	0.381751
CG14984	trough	24	0	20	3.50877e-08	1	2.32524	-3.01275	5.33799	-0.771801	-1.45126	0.22917	0.00576462	0.0708405	0.381751
CG13223	trough	24	0	20	9.7388e-19	1	2.65495	-2.94254	5.59749	-0.902263	-1.36855	0.22917	0.00576462	0.0708405	0.381751
CG32603	trough	24	4	12	0.00568431	0.992102	1.84518	-2.25764	4.10282	-0.817308	-1.71373	0.228717	0.00576462	0.0708405	0.381751
jar	trough	24	4	12	-7.01754e-08	1	1.71842	-2.74883	4.46725	-0.625144	-1.32969	0.228717	0.00576462	0.0708405	0.381751
Rrp6	trough	24	20	20	-0.0132969	1.03243	1.77717	-3.00484	4.78201	-0.591434	-1.0494	0.229398	0.00576462	0.0708405	0.381751
CG15333	trough	24	20	20	-0.0126876	0.995726	1.31394	-4.26128	5.57522	-0.308343	-6.87628	0.229398	0.00576462	0.0708405	0.381751
Best4	trough	24	8	20	0.13397	0.993356	1.7384	-3.35976	5.09817	-0.517419	-2.14205	0.229548	0.00576462	0.0708405	0.381751
CG11113	trough	24	16	12	-0.0292088	0.9582	1.52407	-3.39145	4.91551	-0.449385	-1.15888	0.228832	0.00576462	0.0708405	0.381751
Obp8a	trough	24	20	20	-0.0334986	1.00018	1.36832	-3.18037	4.54869	-0.43024	-1.03405	0.229398	0.00576462	0.0708405	0.381751
CG5516	trough	24	8	12	-0.0887667	1.03977	1.58434	-3.10103	4.68537	-0.510908	-0.849465	0.229548	0.00576462	0.0708405	0.381751
bw	trough	24	16	12	-0.0199843	0.969572	1.90558	-1.90995	3.81552	-0.997712	-1.04937	0.228832	0.00576462	0.0708405	0.381751
pcs	trough	24	0	4	3.50877e-08	1	1.72268	-2.555	4.27768	-0.67424	-1.6208	0.22917	0.00576462	0.0708405	0.381751
Mip	trough	24	16	20	-0.181901	1.11707	2.21863	-3.27261	5.49124	-0.677939	-1.03249	0.228832	0.00576462	0.0708405	0.381751
cona	trough	24	20	12	-0.043495	0.986583	1.5911	-3.26612	4.85722	-0.487153	-1.22326	0.229398	0.00576462	0.0708405	0.381751
Fancl	trough	24	0	20	3.50877e-08	1	1.71712	-3.06669	4.78381	-0.559926	-0.96443	0.22917	0.00576462	0.0708405	0.381751
CG5428	trough	24	4	4	-0.0194992	1.03643	2.08175	-2.22804	4.30979	-0.934343	-1.23363	0.228717	0.00576462	0.0708405	0.381751
Lcp65Ac	trough	24	0	20	0.058114	1.00337	2.02276	-4.17391	6.19666	-0.48462	-1.22822	0.22917	0.00576462	0.0708405	0.381751
Gug	trough	24	12	12	1.75439e-08	1	1.71448	-3.0359	4.75038	-0.564735	-1.36308	0.228682	0.00600064	0.0731605	0.385989
CG4449	trough	24	16	20	-1.75439e-08	1	1.73215	-4.01369	5.74584	-0.431562	-1.83983	0.22755	0.00600064	0.0731605	0.385989
Rpt3	trough	24	8	20	-3.50877e-08	1	2.34909	-2.71467	5.06376	-0.86533	-1.44757	0.228266	0.00600064	0.0731605	0.385989
CG5418	trough	24	20	4	-3.50877e-08	1	2.05139	-3.0573	5.10869	-0.670982	-1.55131	0.228682	0.00600064	0.0731605	0.385989
CG4734	trough	24	16	12	0.0744226	1.06098	3.10872	-2.5783	5.68703	-1.20572	-1.73758	0.22755	0.00600064	0.0731605	0.385989
CG6746	trough	24	0	4	-0.0101657	0.994104	1.87036	-3.7791	5.64945	-0.494922	-1.59155	0.227882	0.00600064	0.0731605	0.385989
AIF	trough	24	16	12	1.75439e-08	1	2.03404	-2.0166	4.05064	-1.00865	-1.4433	0.22755	0.00600064	0.0731605	0.385989
CG12831	trough	24	0	4	0.00140364	0.986143	1.66477	-2.74688	4.41164	-0.606057	-1.24515	0.227882	0.00600064	0.0731605	0.385989
CG3825	trough	24	12	12	1.05263e-07	1	2.10057	-2.21582	4.31638	-0.947988	-1.11297	0.228682	0.00600064	0.0731605	0.385989
CoVa	trough	24	0	4	3.50877e-08	1	3.91758	-1.46145	5.37904	-2.68061	-1.12032	0.227882	0.00600064	0.0731605	0.385989
140up	trough	24	20	12	0.0642734	1.01049	1.84199	-2.13076	3.97276	-0.864475	-1.24769	0.228116	0.00600064	0.0731605	0.385989
Spt6	trough	24	16	4	1.75439e-08	1	2.20531	-2.39751	4.60282	-0.919831	-1.16535	0.22755	0.00600064	0.0731605	0.385989
ball	trough	24	8	12	1.36343e-17	1	1.46516	-3.41712	4.88227	-0.42877	-1.22462	0.228266	0.00600064	0.0731605	0.385989
deltaCOP	trough	24	8	12	0.0112315	0.994746	1.9141	-2.88875	4.80285	-0.662606	-4.53247	0.228266	0.00600064	0.0731605	0.385989
U2af38	trough	24	12	12	-0.000827243	0.986835	1.88655	-2.29096	4.17751	-0.823475	-1.27408	0.228682	0.00600064	0.0731605	0.385989
CG34391	trough	24	0	4	0.0296031	0.949278	1.69642	-2.39306	4.08948	-0.708892	-2.04609	0.227882	0.00600064	0.0731605	0.385989
CG4645	trough	24	12	4	5.26316e-08	1	2.53121	-2.19569	4.7269	-1.15281	-1.24001	0.228682	0.00600064	0.0731605	0.385989
CG17025	trough	24	0	20	-0.100113	1.00989	1.86046	-2.2795	4.13996	-0.816167	-0.75304	0.227882	0.00600064	0.0731605	0.385989
CG5885	trough	24	12	4	5.26316e-08	1	1.90248	-1.81081	3.71329	-1.05063	-1.1231	0.228682	0.00600064	0.0731605	0.385989
CG9766	trough	24	16	4	0.0205542	0.985255	2.15006	-2.46043	4.61049	-0.873855	-1.83209	0.22755	0.00600064	0.0731605	0.385989
l(3)73Ah	trough	24	8	12	-0.0131537	0.996065	2.03795	-2.82223	4.86017	-0.722106	-1.32661	0.228266	0.00600064	0.0731605	0.385989
CG7137	trough	24	16	4	1.75439e-08	1	3.34242	-3.4855	6.82792	-0.958949	-1.54519	0.22755	0.00600064	0.0731605	0.385989
CG13138	trough	24	0	20	0.161493	1.07803	3.46444	-2.89631	6.36075	-1.19616	-2.27026	0.227882	0.00600064	0.0731605	0.385989
CG33259	trough	24	12	4	0.095822	1.01249	1.93012	-2.60931	4.53942	-0.739705	-3.84974	0.228682	0.00600064	0.0731605	0.385989
ham	trough	24	0	12	0.0536157	0.985358	1.5197	-2.73166	4.25136	-0.556329	-3.34169	0.227882	0.00600064	0.0731605	0.385989
Gip	trough	24	0	20	1.55821e-17	1	1.83194	-2.28517	4.11711	-0.801664	-1.41245	0.227882	0.00600064	0.0731605	0.385989
Mlc1	trough	24	0	12	-1.75439e-08	1	2.0383	-3.44122	5.47953	-0.592319	-1.25056	0.227882	0.00600064	0.0731605	0.385989
eap	trough	24	8	4	-0.145291	0.947465	1.39548	-2.32839	3.72386	-0.599332	-0.685995	0.228266	0.00600064	0.0731605	0.385989
CG11560	trough	24	0	4	0.0215867	0.977821	1.38651	-2.85431	4.24082	-0.48576	-2.39375	0.227882	0.00600064	0.0731605	0.385989
l(1)10Bb	trough	24	16	12	-0.0508636	1.06176	1.79366	-2.89923	4.69289	-0.618667	-0.886851	0.22755	0.00600064	0.0731605	0.385989
CG12012	trough	24	12	20	3.50877e-08	1	1.9076	-3.614	5.5216	-0.527836	-1.32032	0.228682	0.00600064	0.0731605	0.385989
CG17047	trough	24	0	12	0.0772632	0.998016	2.08837	-3.08449	5.17286	-0.677057	-1.94606	0.227882	0.00600064	0.0731605	0.385989
CG4363	trough	24	0	4	0.113015	1.02776	1.7379	-2.81589	4.55379	-0.617175	-2.63691	0.227882	0.00600064	0.0731605	0.385989
Pkn	trough	24	16	12	1.31474e-17	1	1.83424	-2.95471	4.78895	-0.620787	-0.971385	0.22755	0.00600064	0.0731605	0.385989
Unc-76	trough	24	20	12	0.0113119	0.942466	2.08055	-2.76812	4.84868	-0.751612	-0.972751	0.228116	0.00600064	0.0731605	0.385989
Cyp6a17	trough	24	0	12	0.0525024	1.0692	2.52893	-2.82578	5.35471	-0.894951	-1.26175	0.227882	0.00600064	0.0731605	0.385989
Rpp30	trough	24	16	20	-0.0549829	0.985307	1.89328	-2.49144	4.38471	-0.759915	-1.25655	0.22755	0.00600064	0.0731605	0.385989
CG5361	trough	24	16	4	-0.105394	0.932124	1.38521	-2.97475	4.35996	-0.465656	-1.1593	0.226268	0.0062451	0.0760005	0.393394
CG4853	trough	24	4	20	-0.0123743	0.993669	1.66106	-2.78596	4.44703	-0.596227	-1.30299	0.227432	0.0062451	0.0760005	0.393394
Dpt	trough	24	16	12	1.75439e-08	1	1.73318	-2.29816	4.03135	-0.75416	-1.13293	0.226268	0.0062451	0.0760005	0.393394
Jhedup	trough	24	0	20	-0.0216556	1.00435	2.64531	-2.95053	5.59583	-0.896555	-1.53268	0.226595	0.0062451	0.0760005	0.393394
Pbprp3	trough	24	16	4	-0.00381381	0.9916	2.22668	-3.10319	5.32987	-0.717547	-1.45158	0.226268	0.0062451	0.0760005	0.393394
CG10151	trough	24	12	20	0.0543353	0.939222	1.96204	-3.19754	5.15959	-0.613609	-1.20443	0.227401	0.0062451	0.0760005	0.393394
svr	trough	24	4	20	0.0462504	1.06251	2.58221	-2.68655	5.26876	-0.961159	-1.65441	0.227432	0.0062451	0.0760005	0.393394
Gs1	trough	24	4	20	1.75439e-08	1	3.37723	-2.20987	5.5871	-1.52825	-0.87131	0.227432	0.0062451	0.0760005	0.393394
14-3-3zeta	trough	24	4	20	3.50877e-08	1	2.23517	-1.68897	3.92414	-1.32339	-0.912175	0.227432	0.0062451	0.0760005	0.393394
SH3PX1	trough	24	8	12	1.16866e-17	1	2.15329	-2.86397	5.01726	-0.751854	-1.19965	0.226984	0.0062451	0.0760005	0.393394
CG11015	trough	24	4	4	-3.50877e-08	1	1.94224	-3.40588	5.34813	-0.570261	-1.25761	0.227432	0.0062451	0.0760005	0.393394
CG10014	trough	24	12	20	0.0854158	1.05329	2.48952	-1.99921	4.48874	-1.24525	-1.38093	0.227401	0.0062451	0.0760005	0.393394
CG7829	trough	24	12	12	1.75439e-08	1	2.05861	-2.18065	4.23926	-0.944036	-1.22193	0.227401	0.0062451	0.0760005	0.393394
CG13192	trough	24	0	20	1.75439e-08	1	2.27586	-3.17537	5.45123	-0.716721	-1.36501	0.226595	0.0062451	0.0760005	0.393394
Lig4	trough	24	8	4	0.109889	1.05831	2.78522	-2.20871	4.99393	-1.26102	-1.94808	0.226984	0.0062451	0.0760005	0.393394
CG14239	trough	24	0	12	1.07127e-17	1	3.25914	-1.8868	5.14594	-1.72734	-1.13475	0.226595	0.0062451	0.0760005	0.393394
CHOp24	trough	24	12	12	1.75439e-08	1	2.44052	-2.30069	4.74121	-1.06078	-1.00929	0.227401	0.0062451	0.0760005	0.393394
CG15356	trough	24	4	20	0.00902065	1.06313	2.55528	-3.71525	6.27053	-0.687782	-1.65195	0.227432	0.0062451	0.0760005	0.393394
CG13438	trough	24	16	20	-0.0207093	0.965734	1.417	-2.29807	3.71507	-0.616604	-1.37741	0.226268	0.0062451	0.0760005	0.393394
ND42	trough	24	16	20	0	1	1.63659	-2.75134	4.38792	-0.594834	-0.852052	0.226268	0.0062451	0.0760005	0.393394
Cep97	trough	24	20	4	-1.75439e-08	1	2.00984	-2.38868	4.39851	-0.841404	-1.02216	0.227401	0.0062451	0.0760005	0.393394
CG8420	trough	24	12	4	0.148968	1.11629	2.86513	-1.84699	4.71212	-1.55124	-1.53962	0.227401	0.0062451	0.0760005	0.393394
CG5388	trough	24	0	12	-0.00604061	0.97976	1.83031	-2.91101	4.74132	-0.628755	-2.38228	0.226595	0.0062451	0.0760005	0.393394
mri	trough	24	20	4	-0.0181263	1.00043	1.97526	-2.95541	4.93066	-0.668353	-0.818285	0.227401	0.0062451	0.0760005	0.393394
ras	trough	24	4	20	-1.55821e-17	1	1.54766	-3.18544	4.7331	-0.485856	-1.63726	0.227432	0.0062451	0.0760005	0.393394
Srp54k	trough	24	0	12	1.75439e-08	1	2.07949	-2.53144	4.61093	-0.821464	-0.98073	0.226595	0.0062451	0.0760005	0.393394
oys	trough	24	16	12	-0.0153265	0.997803	1.72174	-2.88677	4.60852	-0.596425	-1.83231	0.226268	0.0062451	0.0760005	0.393394
Or71a	trough	24	12	20	0.0758722	1.06043	2.35483	-3.26996	5.62479	-0.720141	-1.64082	0.227401	0.0062451	0.0760005	0.393394
CG18179	trough	24	0	12	0.073776	1.03372	2.08286	-2.32436	4.40721	-0.896101	-2.15103	0.226595	0.0062451	0.0760005	0.393394
CG9662	trough	24	0	12	-0.0206537	0.963029	1.35248	-2.79071	4.14319	-0.484634	-1.59559	0.226595	0.0062451	0.0760005	0.393394
CG8064	trough	24	16	20	-0.00539554	0.983602	1.35384	-2.62467	3.97852	-0.515814	-1.86321	0.226268	0.0062451	0.0760005	0.393394
CG16723	trough	24	0	12	0.0526214	0.979968	1.77691	-1.92009	3.697	-0.925428	-1.95488	0.226595	0.0062451	0.0760005	0.393394
CalpA	trough	24	8	4	-1.67766e-17	1	2.23611	-2.91055	5.14666	-0.768277	-1.4539	0.226984	0.0062451	0.0760005	0.393394
H	trough	24	8	20	5.26316e-08	1	1.81503	-2.82418	4.63922	-0.642676	-1.31174	0.226984	0.0062451	0.0760005	0.393394
Atox1	trough	24	4	20	-6.81716e-18	1	2.14486	-2.32691	4.47176	-0.921763	-0.904538	0.226147	0.00649826	0.0786005	0.399524
CG42306	trough	24	4	20	3.50877e-08	1	1.88094	-2.75567	4.63662	-0.682571	-1.34988	0.226147	0.00649826	0.0786005	0.399524
CG13110	trough	24	0	20	0.0853279	0.956795	1.95322	-2.88104	4.83426	-0.677956	-2.39188	0.225308	0.00649826	0.0786005	0.399524
CG6707	trough	24	4	12	-0.0242943	1.00772	2.14748	-2.39595	4.54344	-0.896295	-0.920968	0.226147	0.00649826	0.0786005	0.399524
DAT	trough	24	4	4	-0.00902769	0.973455	1.92434	-3.65837	5.58271	-0.526009	-1.2729	0.226147	0.00649826	0.0786005	0.399524
CG11490	trough	24	16	12	-7.01754e-08	1	1.78417	-2.94243	4.72659	-0.60636	-1.25086	0.224986	0.00649826	0.0786005	0.399524
CG3446	trough	24	0	20	7.01754e-08	1	2.17605	-2.96319	5.13924	-0.73436	-1.01593	0.225308	0.00649826	0.0786005	0.399524
CG17839	trough	24	4	20	-3.50877e-08	1	2.15404	-2.0764	4.23044	-1.03739	-1.19499	0.226147	0.00649826	0.0786005	0.399524
lds	trough	24	0	20	-0.127965	1.10861	1.6898	-3.67617	5.36596	-0.459662	-0.698001	0.225308	0.00649826	0.0786005	0.399524
CAP-D2	trough	24	12	12	3.50877e-08	1	2.08819	-2.91639	5.00458	-0.716018	-1.15326	0.22612	0.00649826	0.0786005	0.399524
awd	trough	24	12	4	-3.50877e-08	1	3.86076	-1.99731	5.85807	-1.93298	-0.68986	0.22612	0.00649826	0.0786005	0.399524
RpS17	trough	24	4	12	-5.84328e-18	1	1.63371	-3.63992	5.27363	-0.448832	-2.00842	0.226147	0.00649826	0.0786005	0.399524
HspB8	trough	24	8	12	1.75439e-08	1	2.34916	-2.55537	4.90452	-0.919303	-0.968359	0.225701	0.00649826	0.0786005	0.399524
Ir40a	trough	24	4	20	0.0372253	1.02497	2.44349	-2.53577	4.97926	-0.963611	-1.59531	0.226147	0.00649826	0.0786005	0.399524
ste24b	trough	24	8	4	-0.0803108	1.03355	1.41446	-3.89576	5.31022	-0.363075	-1.88462	0.225701	0.00649826	0.0786005	0.399524
TwdlM	trough	24	16	20	0.000985969	0.989684	1.76113	-3.28008	5.04121	-0.536916	-3.00262	0.224986	0.00649826	0.0786005	0.399524
CG4562	trough	24	0	4	0.0110172	0.994612	1.64176	-2.5307	4.17245	-0.648737	-2.03334	0.225308	0.00649826	0.0786005	0.399524
CG10435	trough	24	12	12	-3.50877e-08	1	1.88185	-2.03129	3.91314	-0.926428	-0.977833	0.22612	0.00649826	0.0786005	0.399524
CG3071	trough	24	8	20	0.00503412	0.991905	2.47854	-2.23992	4.71846	-1.10653	-1.11764	0.225701	0.00649826	0.0786005	0.399524
CG12200	trough	24	8	12	-0.00206553	0.946836	1.53845	-2.6757	4.21415	-0.574971	-1.48382	0.225701	0.00649826	0.0786005	0.399524
CG13796	trough	24	4	4	-0.0194587	0.914173	1.7698	-1.94311	3.71291	-0.910808	-0.945791	0.226147	0.00649826	0.0786005	0.399524
CG14777	trough	24	0	4	3.50877e-08	1	2.01099	-3.27611	5.2871	-0.613833	-1.04708	0.225308	0.00649826	0.0786005	0.399524
vps24	trough	24	20	4	-1.75439e-08	1	2.15788	-2.0432	4.20108	-1.05613	-0.814145	0.22612	0.00649826	0.0786005	0.399524
CG42368	trough	24	8	4	-0.0438261	1.02101	1.92459	-3.63841	5.56299	-0.528964	-1.9861	0.225701	0.00649826	0.0786005	0.399524
CG8801	trough	24	20	12	3.50877e-08	1	1.87181	-2.17543	4.04724	-0.860434	-1.09463	0.225553	0.00649826	0.0786005	0.399524
CG18371	trough	24	0	4	-0.010292	0.998825	2.15452	-2.21546	4.36998	-0.972495	-1.24606	0.225308	0.00649826	0.0786005	0.399524
xl6	trough	24	12	20	0.0201083	0.990618	2.45663	-2.56466	5.02129	-0.957876	-1.23832	0.22612	0.00649826	0.0786005	0.399524
CG3626	trough	24	8	4	5.26316e-08	1	1.91401	-2.86803	4.78204	-0.667358	-1.23756	0.225701	0.00649826	0.0786005	0.399524
Elo68alpha	trough	24	0	4	-0.0297093	0.937275	1.68387	-2.97787	4.66174	-0.56546	-1.20128	0.225308	0.00649826	0.0786005	0.399524
CG11722	trough	24	0	4	-7.01754e-08	1	1.67863	-3.25444	4.93307	-0.515796	-1.36427	0.225308	0.00649826	0.0786005	0.399524
CG11980	trough	24	0	4	-3.50877e-08	1	1.89023	-2.20582	4.09605	-0.856926	-1.37933	0.225308	0.00649826	0.0786005	0.399524
CG13641	trough	24	0	12	0.0536651	0.983269	2.21032	-2.59063	4.80095	-0.853201	-1.24341	0.225308	0.00649826	0.0786005	0.399524
CG9886	trough	24	0	4	7.01754e-08	1	2.43521	-2.26996	4.70517	-1.0728	-1.16975	0.225308	0.00649826	0.0786005	0.399524
Dbi	trough	24	12	4	1.75439e-08	1	2.25118	-2.91235	5.16353	-0.772978	-1.28198	0.224839	0.00676036	0.0814405	0.406417
CG7638	trough	24	4	20	0.0256515	1.00961	2.36745	-2.52614	4.89359	-0.937178	-1.32139	0.224862	0.00676036	0.0814405	0.406417
Spn5	trough	24	20	4	3.50877e-08	1	1.99676	-3.00206	4.99883	-0.665131	-1.23805	0.224839	0.00676036	0.0814405	0.406417
yata	trough	24	0	20	3.50877e-08	1	1.51573	-2.27991	3.79564	-0.664819	-1.15126	0.22402	0.00676036	0.0814405	0.406417
CG3609	trough	24	4	20	0	1	2.43045	-2.8807	5.31116	-0.843702	-1.73245	0.224862	0.00676036	0.0814405	0.406417
comt	trough	24	4	20	1.75439e-08	1	1.96988	-2.37993	4.34981	-0.827707	-1.42139	0.224862	0.00676036	0.0814405	0.406417
CG17477	trough	24	20	4	5.84328e-18	1	1.6223	-1.86011	3.4824	-0.872151	-1.24941	0.224839	0.00676036	0.0814405	0.406417
pex13	trough	24	20	20	3.50877e-08	1	1.77113	-1.98003	3.75116	-0.894493	-0.997828	0.224272	0.00676036	0.0814405	0.406417
CG34382	trough	24	4	20	0.00621439	0.991027	1.72769	-3.66908	5.39677	-0.47088	-1.5969	0.224862	0.00676036	0.0814405	0.406417
AQP	trough	24	0	4	-1.75439e-08	1	1.65243	-3.18547	4.8379	-0.51874	-2.39773	0.22402	0.00676036	0.0814405	0.406417
CG12299	trough	24	16	20	-5.26316e-08	1	2.22309	-2.89876	5.12186	-0.766911	-1.3488	0.223704	0.00676036	0.0814405	0.406417
Rtnl1	trough	24	4	12	1.75439e-08	1	2.28918	-2.72108	5.01027	-0.841275	-1.09107	0.224862	0.00676036	0.0814405	0.406417
CG10602	trough	24	4	20	3.50877e-08	1	1.95301	-2.23317	4.18618	-0.874548	-1.06203	0.224862	0.00676036	0.0814405	0.406417
CG3163	trough	24	0	20	-3.50877e-08	1	2.23911	-2.29561	4.53473	-0.975388	-1.62143	0.22402	0.00676036	0.0814405	0.406417
Ripalpha	trough	24	16	20	1.75439e-08	1	1.71686	-2.64579	4.36266	-0.648903	-1.96175	0.223704	0.00676036	0.0814405	0.406417
CG16940	trough	24	8	12	-1.75439e-08	1	1.83699	-2.05222	3.88921	-0.895124	-1.30364	0.224419	0.00676036	0.0814405	0.406417
SerT	trough	24	20	20	-0.0371227	1.00044	1.7173	-3.08042	4.79772	-0.557487	-1.14876	0.224272	0.00676036	0.0814405	0.406417
CG4017	trough	24	8	20	9.7388e-18	1	1.59405	-2.66499	4.25903	-0.598146	-1.29691	0.224419	0.00676036	0.0814405	0.406417
CG14811	trough	24	20	4	0.00405442	1.01855	1.95791	-2.1137	4.07161	-0.926296	-1.17562	0.224839	0.00676036	0.0814405	0.406417
GlcAT-P	trough	24	20	4	9.7388e-18	1	2.12944	-3.0409	5.17034	-0.700268	-1.7917	0.224839	0.00676036	0.0814405	0.406417
CG6490	trough	24	20	20	-0.0692949	0.974903	1.2766	-3.05476	4.33136	-0.417904	-0.921044	0.224272	0.00676036	0.0814405	0.406417
Aats-lys	trough	24	0	12	-0.0204574	1.04312	2.24282	-2.77771	5.02052	-0.807436	-1.05573	0.22402	0.00676036	0.0814405	0.406417
Ctr1A	trough	24	4	12	-5.26316e-08	1	1.95021	-2.35367	4.30388	-0.828583	-1.00218	0.224862	0.00676036	0.0814405	0.406417
miple2	trough	24	0	12	-0.0911497	1.07544	1.54185	-3.27071	4.81256	-0.471413	-1.26368	0.22402	0.00676036	0.0814405	0.406417
CG5245	trough	24	0	12	-0.0600831	0.970698	1.25086	-3.91562	5.16648	-0.319453	-1.66174	0.22402	0.00676036	0.0814405	0.406417
CG18596	trough	24	4	20	-0.086931	0.991938	1.88748	-2.08437	3.97185	-0.905537	-0.814778	0.224862	0.00676036	0.0814405	0.406417
Pngl	trough	24	16	12	-7.01754e-08	1	1.3805	-2.23783	3.61833	-0.616891	-1.18722	0.223704	0.00676036	0.0814405	0.406417
b6	trough	24	0	20	0.013391	0.97698	1.76491	-3.02008	4.78499	-0.584392	-1.42424	0.22402	0.00676036	0.0814405	0.406417
Cyp4e2	trough	24	16	20	-1.75439e-08	1	2.20327	-2.51725	4.72052	-0.875269	-1.12493	0.223704	0.00676036	0.0814405	0.406417
CG9631	trough	24	4	4	0.142614	0.993783	1.95407	-2.85226	4.80633	-0.685095	-1.92402	0.224862	0.00676036	0.0814405	0.406417
ImpL3	trough	24	12	20	-0.0382078	0.966896	1.60597	-2.19911	3.80508	-0.730282	-1.0677	0.224839	0.00676036	0.0814405	0.406417
CG31864	trough	24	8	20	4.67462e-17	1	2.01356	-2.364	4.37756	-0.851756	-1.0689	0.224419	0.00676036	0.0814405	0.406417
CG15386	trough	24	20	20	-3.50877e-08	1	1.8584	-2.2897	4.1481	-0.811637	-0.856404	0.224272	0.00676036	0.0814405	0.406417
Syn	trough	24	20	4	-5.26316e-08	1	2.33676	-1.93039	4.26714	-1.21051	-1.33897	0.224839	0.00676036	0.0814405	0.406417
CG11997	trough	24	8	4	0.0239744	1.0073	1.54998	-3.61598	5.16596	-0.428647	-9.0009	0.223136	0.00703166	0.0842705	0.41476
CG6049	trough	24	20	4	1.75439e-08	1	2.51755	-2.63367	5.15122	-0.955911	-1.37565	0.223558	0.00703166	0.0842705	0.41476
CG4030	trough	24	4	20	7.01754e-08	1	1.8888	-1.62685	3.51565	-1.16102	-1.11912	0.223577	0.00703166	0.0842705	0.41476
AlCR2	trough	24	0	12	-1.75439e-08	1	1.84837	-2.38863	4.23699	-0.773819	-1.22394	0.222733	0.00703166	0.0842705	0.41476
Yp1	trough	24	4	4	-0.0136413	0.996432	1.86839	-2.00225	3.87064	-0.933146	-1.06869	0.223577	0.00703166	0.0842705	0.41476
CG1582	trough	24	12	12	0.00407629	0.983387	1.83893	-2.6791	4.51803	-0.686398	-1.40713	0.223558	0.00703166	0.0842705	0.41476
Mst85C	trough	24	0	20	-0.0258964	1.00996	1.61128	-3.97783	5.58911	-0.405063	-2.20686	0.222733	0.00703166	0.0842705	0.41476
PQBP-1	trough	24	8	4	-0.0256934	0.942685	1.62383	-3.26685	4.89068	-0.497062	-1.16775	0.223136	0.00703166	0.0842705	0.41476
Oamb	trough	24	8	12	-0.0225693	1.01948	1.84943	-2.73696	4.58639	-0.675725	-1.1044	0.223136	0.00703166	0.0842705	0.41476
kune	trough	24	12	12	1.75439e-08	1	2.22717	-2.2582	4.48537	-0.986261	-1.01769	0.223558	0.00703166	0.0842705	0.41476
CG16852	trough	24	0	4	-0.0769121	0.990422	1.55006	-3.84786	5.39792	-0.402837	-0.82233	0.222733	0.00703166	0.0842705	0.41476
CG4770	trough	24	8	4	-0.0330207	1.00219	1.96218	-3.21378	5.17597	-0.610553	-1.28609	0.223136	0.00703166	0.0842705	0.41476
CG13367	trough	24	20	4	-0.0322496	0.975579	2.01216	-2.54706	4.55922	-0.789995	-1.27738	0.223558	0.00703166	0.0842705	0.41476
CG8388	trough	24	0	20	-0.0631982	1.02513	2.8041	-2.35951	5.16361	-1.18843	-0.890902	0.222733	0.00703166	0.0842705	0.41476
IM2	trough	24	8	20	6.81716e-18	1	2.04367	-1.90449	3.94816	-1.07308	-1.2365	0.223136	0.00703166	0.0842705	0.41476
oxt	trough	24	12	4	0.0134789	0.964148	2.45631	-2.71951	5.17582	-0.903218	-1.12293	0.223558	0.00703166	0.0842705	0.41476
lox2	trough	24	20	4	0.0199521	0.984394	2.12904	-2.25771	4.38675	-0.943009	-1.46732	0.223558	0.00703166	0.0842705	0.41476
lid	trough	24	12	12	3.50877e-08	1	1.68297	-2.32138	4.00435	-0.724989	-1.16123	0.223558	0.00703166	0.0842705	0.41476
tau	trough	24	4	4	3.50877e-08	1	1.69443	-3.03389	4.72832	-0.558499	-1.25794	0.223577	0.00703166	0.0842705	0.41476
CG32486	trough	24	20	4	1.75439e-08	1	1.89253	-2.04386	3.9364	-0.925959	-1.47095	0.223558	0.00703166	0.0842705	0.41476
CG16957	trough	24	0	4	-0.0757877	0.97232	1.43204	-2.20792	3.63997	-0.648591	-0.882333	0.222733	0.00703166	0.0842705	0.41476
CG10347	trough	24	12	12	-0.027468	1.01228	1.89081	-2.20768	4.09848	-0.856469	-0.837222	0.223558	0.00703166	0.0842705	0.41476
CG13126	trough	24	12	20	-3.50877e-08	1	2.6658	-2.81676	5.48256	-0.946407	-1.3623	0.223558	0.00703166	0.0842705	0.41476
CG3687	trough	24	12	4	0.0038948	0.988801	1.83111	-2.65809	4.4892	-0.68888	-2.193	0.223558	0.00703166	0.0842705	0.41476
CG8358	trough	24	20	4	-0.0300141	0.98146	1.70563	-2.23854	3.94418	-0.761937	-1.26268	0.223558	0.00703166	0.0842705	0.41476
Acp62F	trough	24	0	4	0.0449729	1.00258	1.66841	-2.63588	4.30429	-0.632961	-1.6295	0.222733	0.00703166	0.0842705	0.41476
CG1227	trough	24	12	12	0.0246095	0.991662	1.91807	-2.89044	4.80851	-0.663591	-1.52886	0.222276	0.00731242	0.0869205	0.419597
CG4330	trough	24	12	4	5.26316e-08	1	1.7251	-2.11534	3.84044	-0.815521	-1.21706	0.222276	0.00731242	0.0869205	0.419597
Cpr64Ab	trough	24	12	20	-0.115458	0.980705	2.03639	-2.45253	4.48892	-0.830323	-0.708443	0.222276	0.00731242	0.0869205	0.419597
TyrR	trough	24	16	20	-0.00860559	0.977136	1.81995	-2.73816	4.55811	-0.664661	-1.50891	0.222422	0.00731242	0.0869205	0.419597
CG18284	trough	24	0	4	-0.0065741	1.0329	2.23597	-2.54272	4.77869	-0.879361	-1.30443	0.221445	0.00731242	0.0869205	0.419597
CG5941	trough	24	4	20	5.26316e-08	1	1.95447	-2.36304	4.31752	-0.827102	-1.01478	0.222292	0.00731242	0.0869205	0.419597
CG30372	trough	24	0	20	-0.0952762	0.985686	1.83169	-2.1586	3.99028	-0.848554	-1.10228	0.221445	0.00731242	0.0869205	0.419597
CG11092	trough	24	16	12	0.0298531	0.968531	1.55308	-2.29237	3.84545	-0.677502	-1.47465	0.222422	0.00731242	0.0869205	0.419597
porin	trough	24	8	12	1.75439e-08	1	1.87831	-3.04276	4.92107	-0.617306	-1.26407	0.221854	0.00731242	0.0869205	0.419597
CG15650	trough	24	4	4	-1.75439e-08	1	2.76215	-2.33085	5.09301	-1.18504	-0.898609	0.222292	0.00731242	0.0869205	0.419597
CG12828	trough	24	0	4	-1.75439e-08	1	1.7766	-2.853	4.6296	-0.622712	-0.917302	0.221445	0.00731242	0.0869205	0.419597
CG2083	trough	24	20	12	-1.55821e-17	1	2.32422	-2.09352	4.41773	-1.1102	-1.43224	0.221709	0.00731242	0.0869205	0.419597
shd	trough	24	12	4	-0.000404149	0.970742	2.47449	-2.29202	4.76651	-1.07961	-1.17617	0.222276	0.00731242	0.0869205	0.419597
CG3732	trough	24	0	20	1.75439e-08	1	2.13637	-2.07131	4.20768	-1.03141	-0.79308	0.221445	0.00731242	0.0869205	0.419597
CG13675	trough	24	12	4	-0.0717514	0.941297	1.69995	-2.27144	3.97139	-0.748403	-0.96418	0.222276	0.00731242	0.0869205	0.419597
twe	trough	24	4	20	-0.0572285	0.962332	1.75687	-2.48786	4.24473	-0.706179	-1.0921	0.222292	0.00731242	0.0869205	0.419597
CG15653	trough	24	16	20	-0.0313605	0.992263	1.69181	-3.38196	5.07377	-0.500244	-1.35133	0.222422	0.00731242	0.0869205	0.419597
CG1332	trough	24	12	12	-3.50877e-08	1	2.34415	-2.35232	4.69648	-0.996525	-1.83526	0.222276	0.00731242	0.0869205	0.419597
CG6405	trough	24	4	12	-0.0352228	0.975073	1.77834	-1.78633	3.56467	-0.995525	-1.07906	0.222292	0.00731242	0.0869205	0.419597
Aats-gln	trough	24	20	4	5.26316e-08	1	1.6195	-2.62157	4.24107	-0.617758	-1.46627	0.222276	0.00731242	0.0869205	0.419597
Arp87C	trough	24	8	20	-9.7388e-18	1	1.845	-2.43771	4.28271	-0.756856	-0.928903	0.221854	0.00731242	0.0869205	0.419597
rtGEF	trough	24	0	20	0.0968933	0.998313	2.10139	-2.03694	4.13833	-1.03164	-1.36664	0.221445	0.00731242	0.0869205	0.419597
CG5599	trough	24	4	12	5.26316e-08	1	1.84783	-2.35189	4.19972	-0.785677	-1.10393	0.222292	0.00731242	0.0869205	0.419597
Sdc	trough	24	4	20	-1.05263e-07	1	2.10691	-2.75941	4.86631	-0.763536	-1.14964	0.222292	0.00731242	0.0869205	0.419597
PpD3	trough	24	16	12	-1.75439e-08	1	2.45137	-2.77952	5.23089	-0.881941	-1.96673	0.222422	0.00731242	0.0869205	0.419597
CG11347	trough	24	16	20	-3.50877e-08	1	2.70261	-2.00568	4.70829	-1.34748	-1.05274	0.222422	0.00731242	0.0869205	0.419597
CG31694	trough	24	4	20	-8.76492e-18	1	2.09826	-2.67301	4.77127	-0.78498	-0.811983	0.222292	0.00731242	0.0869205	0.419597
ATPsyn-beta	trough	24	0	4	-3.50877e-08	1	1.58749	-3.31204	4.89953	-0.479311	-1.10453	0.221445	0.00731242	0.0869205	0.419597
GLaz	trough	24	20	12	1.75439e-08	1	2.40862	-3.28355	5.69217	-0.733542	-1.41252	0.221709	0.00731242	0.0869205	0.419597
CG3683	trough	24	0	12	-1.75439e-08	1	1.74026	-3.16736	4.90763	-0.549436	-1.61951	0.221445	0.00731242	0.0869205	0.419597
CG4744	trough	24	20	20	-0.0124202	1.00048	1.5591	-3.26272	4.82182	-0.477852	-1.59333	0.221709	0.00731242	0.0869205	0.419597
tsu	trough	24	16	4	3.89552e-18	1	1.98114	-2.76184	4.74298	-0.717327	-1.58898	0.222422	0.00731242	0.0869205	0.419597
CG6188	trough	24	4	4	-3.89552e-18	1	1.73558	-2.01491	3.75049	-0.861366	-1.52057	0.222292	0.00731242	0.0869205	0.419597
CG11267	trough	24	4	20	-2.14254e-17	1	1.47199	-2.22372	3.69571	-0.661947	-1.63021	0.222292	0.00731242	0.0869205	0.419597
CG4250	trough	24	0	12	-1.75439e-08	1	2.08754	-2.82863	4.91617	-0.738006	-1.43521	0.221445	0.00731242	0.0869205	0.419597
Cyp9h1	trough	24	16	12	7.79104e-18	1	1.96404	-2.06497	4.02901	-0.951122	-1.04216	0.222422	0.00731242	0.0869205	0.419597
Fit1	trough	24	16	20	1.75439e-08	1	2.38554	-2.1937	4.57923	-1.08745	-0.960002	0.222422	0.00731242	0.0869205	0.419597
Pak	trough	24	12	12	-5.26316e-08	1	2.26356	-3.14008	5.40364	-0.720861	-1.19329	0.220995	0.00760293	0.0899405	0.426005
CG12428	trough	24	8	12	-5.26316e-08	1	2.27227	-2.85956	5.13184	-0.794623	-1.49189	0.220572	0.00760293	0.0899405	0.426005
Lcp2	trough	24	0	12	7.79104e-18	1	2.05158	-3.46517	5.51675	-0.592057	-1.28507	0.220158	0.00760293	0.0899405	0.426005
CG4447	trough	24	4	4	0.117643	1.03856	2.53042	-2.13444	4.66486	-1.18552	-2.25515	0.221007	0.00760293	0.0899405	0.426005
Dhfr	trough	24	4	4	0.016039	1.02508	1.6968	-2.84838	4.54518	-0.595707	-1.57673	0.221007	0.00760293	0.0899405	0.426005
CG11191	trough	24	4	12	0.0131787	0.996083	1.7992	-2.73028	4.52947	-0.65898	-2.256	0.221007	0.00760293	0.0899405	0.426005
beta3GalTII	trough	24	0	20	-0.0117327	0.986971	2.02273	-2.44739	4.47011	-0.826483	-0.900108	0.220158	0.00760293	0.0899405	0.426005
CG7692	trough	24	8	20	-0.0388397	1.00015	2.14031	-2.82663	4.96694	-0.757196	-1.20593	0.220572	0.00760293	0.0899405	0.426005
Adf1	trough	24	8	20	-2.33731e-17	1	2.15166	-2.54005	4.69171	-0.847093	-1.19458	0.220572	0.00760293	0.0899405	0.426005
CG14414	trough	24	12	12	-0.108842	1.03212	1.50404	-3.76333	5.26737	-0.399656	-1.2585	0.220995	0.00760293	0.0899405	0.426005
CG9150	trough	24	0	20	-0.0430923	1.07919	1.95749	-2.87042	4.82791	-0.681952	-0.888637	0.220158	0.00760293	0.0899405	0.426005
mys	trough	24	4	20	-5.26316e-08	1	1.87784	-2.84617	4.72401	-0.659778	-1.17663	0.221007	0.00760293	0.0899405	0.426005
Reps	trough	24	12	20	0.0959911	1.05371	2.7912	-2.67775	5.46895	-1.04237	-2.52238	0.220995	0.00760293	0.0899405	0.426005
CG7366	trough	24	20	12	0.0444939	1.08831	1.92827	-2.836	4.76427	-0.679926	-1.88354	0.220427	0.00760293	0.0899405	0.426005
CG3530	trough	24	4	20	-0.0800221	1.06874	1.68911	-3.05521	4.74432	-0.552862	-0.927033	0.221007	0.00760293	0.0899405	0.426005
Meics	trough	24	12	12	-0.0223348	1.00518	1.88964	-2.42366	4.3133	-0.779664	-1.61836	0.220995	0.00760293	0.0899405	0.426005
CG1703	trough	24	20	4	1.75439e-08	1	2.35104	-1.94347	4.29451	-1.20971	-1.03288	0.220995	0.00760293	0.0899405	0.426005
Syx13	trough	24	16	4	-0.0730964	0.976334	1.79012	-2.45949	4.24962	-0.727843	-1.17423	0.22114	0.00760293	0.0899405	0.426005
CG14590	trough	24	20	20	-0.0745752	1.0181	1.71416	-2.6643	4.37846	-0.643381	-0.877773	0.220427	0.00760293	0.0899405	0.426005
caps	trough	24	0	20	-0.0324649	0.991725	1.47488	-2.81979	4.29467	-0.523046	-1.47103	0.220158	0.00760293	0.0899405	0.426005
unc	trough	24	0	4	-1.75439e-08	1	2.4611	-1.92354	4.38464	-1.27947	-0.8522	0.220158	0.00760293	0.0899405	0.426005
yellow-g	trough	24	4	12	1.36343e-17	1	2.13758	-3.20701	5.34459	-0.666535	-1.03152	0.221007	0.00760293	0.0899405	0.426005
CG33521	trough	24	20	4	-9.7388e-18	1	1.84444	-2.42706	4.2715	-0.759949	-1.35435	0.220995	0.00760293	0.0899405	0.426005
CG15629	trough	24	16	4	-3.50877e-08	1	3.74055	-2.83048	6.57103	-1.32153	-1.23128	0.22114	0.00760293	0.0899405	0.426005
CG14096	trough	24	4	12	-0.00958679	0.904945	1.72237	-3.08058	4.80295	-0.559107	-1.38812	0.221007	0.00760293	0.0899405	0.426005
CG32479	trough	24	16	4	0.00202754	0.952797	1.32489	-2.20182	3.52671	-0.601724	-1.02038	0.22114	0.00760293	0.0899405	0.426005
CG3919	trough	24	0	20	0.00567468	0.992098	2.01452	-3.24767	5.26219	-0.620298	-1.54989	0.220158	0.00760293	0.0899405	0.426005
CG1103	trough	24	4	4	0	1	1.80215	-3.65838	5.46052	-0.492608	-1.29667	0.221007	0.00760293	0.0899405	0.426005
CG6738	trough	24	4	4	0.0416484	1.00899	1.76208	-2.79882	4.5609	-0.629582	-1.6214	0.221007	0.00760293	0.0899405	0.426005
CG34429	trough	24	4	20	0.100593	1.04166	2.20276	-2.98392	5.18667	-0.73821	-3.78056	0.221007	0.00760293	0.0899405	0.426005
CG15221	trough	24	4	12	-3.50877e-08	1	2.06184	-2.79044	4.85228	-0.738895	-1.00568	0.221007	0.00760293	0.0899405	0.426005
Sema-5c	trough	24	8	20	0.0110226	0.976351	1.84839	-2.47383	4.32222	-0.747175	-1.14918	0.220572	0.00760293	0.0899405	0.426005
CG15393	trough	24	4	4	-0.021239	1.00385	1.4416	-2.95729	4.39889	-0.487473	-1.40466	0.221007	0.00760293	0.0899405	0.426005
CG12991	trough	24	16	20	1.75439e-08	1	2.60769	-2.17277	4.78047	-1.20017	-0.875411	0.22114	0.00760293	0.0899405	0.426005
CG4218	trough	24	0	4	-0.0330559	0.907923	1.58204	-2.82384	4.40588	-0.560244	-1.3971	0.220158	0.00760293	0.0899405	0.426005
CG11555	trough	24	0	12	9.7388e-19	1	2.27786	-2.84992	5.12779	-0.799271	-1.52239	0.220158	0.00760293	0.0899405	0.426005
Treh	trough	24	20	4	-1.75439e-08	1	1.98655	-2.29012	4.27667	-0.867442	-1.15123	0.220995	0.00760293	0.0899405	0.426005
lambdaTry	trough	24	0	4	-0.00796035	0.983437	1.77847	-2.23416	4.01262	-0.796035	-1.19176	0.21887	0.00790345	0.0929605	0.433257
Sply	trough	24	12	12	-3.50877e-08	1	2.13524	-3.07912	5.21436	-0.693457	-1.16729	0.219714	0.00790345	0.0929605	0.433257
CG42507	trough	24	16	20	-0.0433192	0.983767	1.80793	-2.21267	4.0206	-0.817079	-0.960434	0.219858	0.00790345	0.0929605	0.433257
Sce	trough	24	16	4	-3.50877e-08	1	2.40492	-2.62151	5.02642	-0.91738	-1.4141	0.219858	0.00790345	0.0929605	0.433257
Rae1	trough	24	8	20	0.0184439	1.00075	1.76039	-3.12352	4.88391	-0.563593	-1.22573	0.219289	0.00790345	0.0929605	0.433257
Klp68D	trough	24	20	4	5.26316e-08	1	2.45392	-2.67012	5.12404	-0.919031	-1.82269	0.219714	0.00790345	0.0929605	0.433257
Sgt	trough	24	16	4	7.79104e-18	1	2.72823	-2.36303	5.09127	-1.15455	-1.09589	0.219858	0.00790345	0.0929605	0.433257
CG10804	trough	24	12	12	0.00908901	0.988864	1.61017	-2.26776	3.87793	-0.71003	-1.46507	0.219714	0.00790345	0.0929605	0.433257
CG1599	trough	24	4	20	1.75439e-08	1	1.6858	-2.66179	4.34759	-0.633334	-1.33393	0.219722	0.00790345	0.0929605	0.433257
CG8046	trough	24	8	20	-0.0686497	0.999327	1.66716	-2.35198	4.01915	-0.708831	-1.02926	0.219289	0.00790345	0.0929605	0.433257
CG33169	trough	24	0	20	5.26316e-08	1	1.93332	-3.32736	5.26068	-0.581036	-1.06257	0.21887	0.00790345	0.0929605	0.433257
Orct2	trough	24	16	4	1.75439e-08	1	1.82272	-2.74247	4.56519	-0.664629	-1.00232	0.219858	0.00790345	0.0929605	0.433257
Taf4	trough	24	12	12	-1.75439e-08	1	2.08422	-2.12921	4.21343	-0.97887	-1.02254	0.219714	0.00790345	0.0929605	0.433257
hyd	trough	24	4	20	-7.79104e-18	1	1.83045	-3.37061	5.20106	-0.543061	-1.62092	0.219722	0.00790345	0.0929605	0.433257
CG1021	trough	24	16	4	0.0531645	1.02275	1.88195	-2.27373	4.15569	-0.827694	-1.46443	0.219858	0.00790345	0.0929605	0.433257
CG7365	trough	24	12	12	1.75439e-08	1	2.37329	-3.23408	5.60736	-0.733838	-1.12952	0.219714	0.00790345	0.0929605	0.433257
CG14011	trough	24	4	4	-0.199949	0.945695	1.91128	-3.67616	5.58744	-0.519912	-0.614485	0.219722	0.00790345	0.0929605	0.433257
CG13841	trough	24	8	4	8.77193e-08	1	2.01274	-1.92704	3.93978	-1.04448	-1.71197	0.219289	0.00790345	0.0929605	0.433257
bcn92	trough	24	16	20	-0.0642698	0.999004	1.79746	-3.20131	4.99876	-0.561477	-1.12005	0.219858	0.00790345	0.0929605	0.433257
Fas1	trough	24	20	20	-2.80295e-17	1	2.12905	-2.19603	4.32508	-0.969502	-0.865741	0.219145	0.00790345	0.0929605	0.433257
l(1)G0230	trough	24	0	4	7.79104e-18	1	1.77299	-2.80389	4.57688	-0.63233	-1.15143	0.21887	0.00790345	0.0929605	0.433257
r2d2	trough	24	8	20	-0.00911111	0.987656	1.67075	-2.8488	4.51955	-0.586473	-1.09738	0.219289	0.00790345	0.0929605	0.433257
eIF6	trough	24	4	12	0.0514132	0.981987	1.79876	-2.54287	4.34163	-0.707376	-2.30958	0.219722	0.00790345	0.0929605	0.433257
CG9572	trough	24	16	12	3.50877e-08	1	2.51518	-2.34321	4.85838	-1.07339	-1.05146	0.219858	0.00790345	0.0929605	0.433257
CG12071	trough	24	16	12	-0.0477936	0.980925	2.01548	-3.72885	5.74433	-0.54051	-1.03042	0.219858	0.00790345	0.0929605	0.433257
CG6454	trough	24	20	4	-9.7388e-19	1	1.72176	-3.18692	4.90868	-0.540259	-1.33093	0.219714	0.00790345	0.0929605	0.433257
CG7215	trough	24	20	20	-0.014219	1.06438	1.63744	-3.4342	5.07164	-0.476805	-1.37212	0.219145	0.00790345	0.0929605	0.433257
pn	trough	24	12	12	3.50877e-08	1	2.20973	-2.96664	5.17637	-0.744859	-1.41541	0.219714	0.00790345	0.0929605	0.433257
CG5867	trough	24	4	12	3.89552e-18	1	2.07678	-1.49798	3.57476	-1.38638	-1.01591	0.219722	0.00790345	0.0929605	0.433257
CG34420	trough	24	20	20	0.021809	0.969203	2.04814	-2.77916	4.8273	-0.736964	-1.14383	0.219145	0.00790345	0.0929605	0.433257
CG14102	trough	24	4	12	-0.0315629	1.1355	1.69849	-3.37867	5.07716	-0.502708	-1.39842	0.219722	0.00790345	0.0929605	0.433257
CG10184	trough	24	20	20	-0.000692469	1.00024	2.00363	-2.52705	4.53068	-0.792876	-1.20441	0.219145	0.00790345	0.0929605	0.433257
Idgf4	trough	24	4	12	-1.75439e-08	1	2.12744	-2.9297	5.05715	-0.726164	-0.898432	0.218437	0.00821426	0.0962305	0.439264
[truncated: 7,313 more rows]

## Sheet: per24_phby4_a8-16_empP_len29
ID	Waveform	Period	Phase	Width	Mean	Std_Dev	Max	Min	Max_Amp	FC	IQR_FC	Tau	P	empP	BH1
tim	trough	24	12	16	4.52854e-17	1	1.41564	-1.77127	3.18691	-0.799225	-0.897361	0.730886	2.26031e-20	5e-07	4.656e-05
Ugt35b	trough	24	0	16	5.84328e-18	1	1.87052	-1.99365	3.86417	-0.938241	-1.25357	0.726134	5.07479e-20	5e-07	4.656e-05
Cyp4d21	trough	24	20	8	1.75439e-08	1	2.03004	-1.9485	3.97855	-1.04185	-1.02505	0.683484	2.7434e-17	5e-07	4.656e-05
vri	trough	24	16	8	-3.70074e-17	1	1.77783	-1.53953	3.31736	-1.15479	-1.1212	0.678804	4.5686e-17	5e-07	4.656e-05
Slob	trough	24	12	16	8.77193e-08	1	1.74434	-2.04838	3.79272	-0.851573	-1.42471	0.655299	9.9451e-16	5e-07	4.656e-05
CG14275	trough	24	16	8	1.75439e-08	1	1.769	-2.36086	4.12986	-0.749304	-1.21138	0.613424	1.2107e-13	5e-07	4.656e-05
Pdp1	trough	24	16	8	1.75439e-08	1	2.26713	-1.89707	4.1642	-1.19507	-0.922364	0.613424	1.2107e-13	5e-07	4.656e-05
Chd64	trough	24	0	16	-1.75439e-08	1	1.64446	-1.94226	3.58672	-0.846673	-0.99507	0.602537	4.02968e-13	5e-07	4.656e-05
CG10553	trough	24	20	8	-3.50877e-08	1	1.8381	-1.7823	3.6204	-1.03131	-1.30794	0.586118	2.12716e-12	5e-07	4.656e-05
Ubpy	trough	24	8	16	1.75439e-08	1	1.77468	-1.53229	3.30697	-1.15819	-1.104	0.564253	1.86303e-11	5e-07	4.656e-05
Pdh	trough	24	4	8	-1.11996e-17	1	1.99407	-2.24164	4.2357	-0.889558	-1.14282	0.560227	2.63691e-11	5e-07	4.656e-05
trpl	trough	24	8	16	1.75439e-08	1	1.74214	-2.13414	3.87628	-0.816323	-1.18287	0.559123	2.95806e-11	5e-07	4.656e-05
CG17544	trough	24	20	8	-1.55821e-17	1	2.01775	-1.77918	3.79693	-1.13409	-1.16534	0.556652	3.71763e-11	5e-07	4.656e-05
per	trough	24	12	16	-0.00748479	1.01135	1.76299	-2.47698	4.23997	-0.711749	-1.24595	0.555371	4.165e-11	5e-07	4.656e-05
CG30494	trough	24	16	16	-3.50877e-08	1	1.89145	-2.08466	3.97611	-0.90732	-1.11484	0.554453	4.66421e-11	5e-07	4.656e-05
CG10237	trough	24	20	8	3.50877e-08	1	1.85181	-2.0937	3.94551	-0.884468	-1.13691	0.551528	5.84185e-11	5e-07	4.656e-05
ana	trough	24	20	8	7.01754e-08	1	3.34397	-2.08115	5.42512	-1.60679	-0.894569	0.551528	5.84185e-11	5e-07	4.656e-05
Pk61C	trough	24	8	16	-3.50877e-08	1	2.25319	-1.41002	3.66321	-1.59798	-0.808997	0.548864	7.30447e-11	5e-07	4.656e-05
GstD1	trough	24	4	16	5.26316e-08	1	1.94979	-3.07419	5.02398	-0.634247	-0.885051	0.547378	8.16272e-11	5e-07	4.656e-05
CG6409	trough	24	20	8	-3.50877e-08	1	1.77085	-2.00143	3.77228	-0.884789	-1.60072	0.545122	1.01809e-10	5e-07	4.656e-05
Cpr72Ec	trough	24	4	8	7.01754e-08	1	1.94603	-1.76182	3.70784	-1.10456	-1.13518	0.533244	2.69633e-10	5e-07	4.656e-05
Cct2	trough	24	4	16	-3.50877e-08	1	2.00032	-1.84139	3.84171	-1.08631	-1.25718	0.531959	2.99847e-10	5e-07	4.656e-05
CG10513	trough	24	20	16	5.26316e-08	1	1.81507	-2.44529	4.26036	-0.742275	-1.41128	0.531844	3.33315e-10	5e-07	4.656e-05
CG1943	trough	24	20	8	-5.26316e-08	1	2.08759	-1.92538	4.01297	-1.08425	-0.848659	0.531029	3.33315e-10	5e-07	4.656e-05
CG42508	trough	24	20	8	2.72686e-17	1	1.81543	-2.05878	3.87422	-0.881799	-1.30873	0.531029	3.33315e-10	5e-07	4.656e-05
CG2277	trough	24	0	16	-3.50877e-08	1	1.5931	-3.21533	4.80843	-0.495469	-0.926793	0.530438	3.70372e-10	5e-07	4.656e-05
Cyp6a21	trough	24	20	16	-1.75439e-08	1	1.85394	-2.6281	4.48204	-0.70543	-0.98936	0.521592	7.66293e-10	5e-07	4.656e-05
Ndae1	trough	24	20	16	1.75439e-08	1	2.69309	-1.93627	4.62936	-1.39086	-1.05307	0.521592	7.66293e-10	5e-07	4.656e-05
dlp	trough	24	8	16	5.26316e-08	1	1.62654	-2.26202	3.88857	-0.719067	-1.16358	0.519369	9.39966e-10	5e-07	4.656e-05
MESR3	trough	24	16	16	3.50877e-08	1	2.08981	-1.93749	4.0273	-1.07861	-1.06149	0.512148	1.55613e-09	5e-07	4.656e-05
CG10433	trough	24	20	16	3.50877e-08	1	1.83852	-2.52971	4.36824	-0.726772	-1.14038	0.512621	1.55613e-09	5e-07	4.656e-05
betaTub56D	trough	24	8	16	8.77193e-08	1	1.89697	-2.86531	4.76228	-0.662047	-1.31231	0.511675	1.71929e-09	5e-07	4.656e-05
CG4847	trough	24	4	16	1.75439e-08	1	1.908	-2.9557	4.8637	-0.645532	-1.44456	0.507545	2.31365e-09	5e-07	4.656e-05
CG7149	trough	24	20	16	3.50877e-08	1	2.29219	-2.05541	4.3476	-1.1152	-0.898819	0.506213	2.55248e-09	5e-07	4.656e-05
5-HT2	trough	24	16	8	1.75439e-08	1	2.59441	-2.33378	4.92819	-1.11168	-1.34683	0.503174	3.10328e-09	5e-07	4.656e-05
cry	trough	24	4	16	1.36343e-17	1	1.4523	-2.06116	3.51346	-0.704605	-1.47274	0.50369	3.10328e-09	5e-07	4.656e-05
CG17352	trough	24	20	16	-3.50877e-08	1	2.17186	-2.5873	4.75916	-0.839432	-1.31694	0.502368	3.41992e-09	5e-07	4.656e-05
CG17386	trough	24	20	16	0.0150996	0.993583	1.5794	-2.75132	4.33072	-0.574051	-1.29722	0.499805	4.14895e-09	5e-07	4.656e-05
to	trough	24	0	8	0.000773951	0.982495	1.92303	-1.91387	3.8369	-1.00478	-1.11822	0.498252	4.56738e-09	5e-07	4.656e-05
CG15093	trough	24	0	16	5.26316e-08	1	1.75198	-2.76086	4.51283	-0.634577	-1.45096	0.496964	5.02623e-09	5e-07	4.656e-05
Esyt2	trough	24	8	8	7.01754e-08	1	2.82481	-2.3881	5.21292	-1.18287	-1.06801	0.495004	6.08041e-09	5e-07	4.656e-05
CG10641	trough	24	8	8	-1.75439e-08	1	1.79569	-2.27408	4.06977	-0.789635	-1.4633	0.493721	6.68421e-09	5e-07	4.656e-05
Npc2b	trough	24	8	16	1.75439e-08	1	1.57091	-2.36944	3.94035	-0.662987	-1.19198	0.489874	8.86122e-09	5e-07	4.656e-05
CG6126	trough	24	0	16	3.50877e-08	1	2.12826	-2.42712	4.55538	-0.876866	-0.87203	0.490527	8.86122e-09	5e-07	4.656e-05
CG2846	trough	24	8	16	-7.01754e-08	1	2.20049	-2.20722	4.40771	-0.996954	-1.03897	0.487309	1.06751e-08	5e-07	4.656e-05
inaD	trough	24	4	8	1.75439e-08	1	1.61882	-2.3685	3.98732	-0.68348	-1.47214	0.484417	1.28427e-08	5e-07	4.656e-05
t	trough	24	0	8	0.0180736	0.987624	1.72357	-3.06303	4.7866	-0.562703	-1.03985	0.482802	1.54294e-08	5e-07	4.656e-05
c11.1	trough	24	8	16	-1.75439e-08	1	2.38772	-1.77002	4.15774	-1.34898	-1.20717	0.478333	2.0267e-08	5e-07	4.656e-05
b	trough	24	20	8	-1.75439e-08	1	1.79486	-2.01706	3.81192	-0.889839	-1.40308	0.477222	2.21809e-08	5e-07	4.656e-05
GV1	trough	24	4	16	3.50877e-08	1	2.26541	-2.49852	4.76394	-0.906699	-1.20682	0.477992	2.21809e-08	5e-07	4.656e-05
Hydr2	trough	24	16	8	-1.75439e-08	1	2.04516	-1.76062	3.80578	-1.16162	-0.977826	0.471125	3.46553e-08	5e-07	4.656e-05
rgr	trough	24	16	16	0.0173893	0.999695	1.85168	-2.56876	4.42044	-0.720846	-1.10108	0.469843	3.7853e-08	5e-07	4.656e-05
Dip-B	trough	24	4	8	-1.75439e-08	1	1.6043	-3.08755	4.69186	-0.519604	-1.38176	0.468998	4.13323e-08	5e-07	4.656e-05
puc	trough	24	12	8	-1.75439e-08	1	1.89762	-2.85916	4.75678	-0.6637	-1.355	0.464411	5.37049e-08	5e-07	4.656e-05
CG11796	trough	24	4	8	1.75439e-08	1	1.74223	-2.08749	3.82972	-0.834605	-0.958423	0.465143	5.37049e-08	5e-07	4.656e-05
CG8419	trough	24	16	16	-1.75439e-08	1	1.7136	-2.03517	3.74877	-0.841995	-1.09675	0.459587	7.58049e-08	5e-07	4.656e-05
CG8451	trough	24	0	8	-7.79104e-18	1	1.80394	-2.41312	4.21706	-0.747556	-1.36783	0.459627	7.58049e-08	5e-07	4.656e-05
bnb	trough	24	16	8	-1.75439e-08	1	2.61502	-2.35463	4.96965	-1.11059	-1.48876	0.458305	8.25606e-08	5e-07	4.656e-05
pinta	trough	24	20	16	-0.02312	0.98971	1.76302	-3.47254	5.23555	-0.507704	-0.893974	0.458796	8.25606e-08	5e-07	4.656e-05
Tal	trough	24	4	16	-2.33731e-17	1	2.13465	-1.84485	3.9795	-1.15708	-0.978733	0.456148	9.78394e-08	5e-07	4.656e-05
CG14661	trough	24	20	16	1.75439e-08	1	2.33202	-1.91318	4.2452	-1.21892	-1.25553	0.453669	1.15801e-07	5e-07	4.656e-05
CG4991	trough	24	20	8	-1.75439e-08	1	1.79919	-2.58445	4.38364	-0.696161	-1.37354	0.45288	1.25923e-07	5e-07	4.656e-05
Pka-C3	trough	24	16	8	5.26316e-08	1	2.05566	-2.13167	4.18734	-0.964342	-1.04818	0.450613	1.36888e-07	5e-07	4.656e-05
Idh	trough	24	0	16	-5.26316e-08	1	1.68077	-2.79578	4.47655	-0.601182	-1.79934	0.449328	1.48762e-07	5e-07	4.656e-05
CG9009	trough	24	20	8	5.26316e-08	1	2.60036	-1.87179	4.47215	-1.38923	-0.81736	0.450318	1.48762e-07	5e-07	4.656e-05
CG9317	trough	24	8	16	-7.79104e-18	1	2.00365	-2.38383	4.38748	-0.84052	-1.77757	0.447555	1.75527e-07	5e-07	4.656e-05
CG4962	trough	24	8	16	0.0108609	0.959467	1.48349	-3.5299	5.01339	-0.420263	-1.52439	0.447555	1.75527e-07	5e-07	4.656e-05
exba	trough	24	8	8	1.46082e-17	1	1.65785	-2.77056	4.42841	-0.598381	-1.31524	0.443708	2.24454e-07	5e-07	4.656e-05
CG11210	trough	24	4	16	-1.75439e-08	1	1.53913	-2.23902	3.77815	-0.687411	-1.17921	0.440729	2.64032e-07	5e-07	4.656e-05
msta	trough	24	20	16	5.26316e-08	1	2.39774	-1.70194	4.09968	-1.40883	-0.981943	0.439572	2.86236e-07	5e-07	4.656e-05
CG8889	trough	24	4	8	-1.75439e-08	1	2.22309	-2.684	4.90709	-0.828274	-1.01672	0.438159	3.10215e-07	5e-07	4.656e-05
rdgC	trough	24	20	8	-0.00651278	0.992387	2.04731	-1.86584	3.91315	-1.09726	-0.792548	0.438788	3.10215e-07	5e-07	4.656e-05
CG5455	trough	24	8	16	1.75439e-08	1	1.61407	-2.36916	3.98323	-0.681286	-0.90744	0.436014	3.64041e-07	5e-07	4.656e-05
CG7296	trough	24	16	8	3.50877e-08	1	2.71083	-2.35423	5.06506	-1.15147	-1.39157	0.43523	3.94184e-07	5e-07	4.656e-05
Pkc53E	trough	24	20	16	2.33731e-17	1	1.74348	-1.92468	3.66816	-0.905854	-1.06073	0.431883	4.61757e-07	5e-07	4.656e-05
Hdc	trough	24	20	16	7.79104e-18	1	2.06226	-2.3122	4.37446	-0.891901	-1.46492	0.430602	4.99549e-07	5e-07	4.656e-05
cenB1A	trough	24	8	16	5.26316e-08	1	1.60197	-2.53367	4.13565	-0.632272	-1.30145	0.429602	5.40276e-07	5e-07	4.656e-05
CG18302	trough	24	16	8	-9.7388e-18	1	1.67817	-2.63186	4.31002	-0.637636	-1.43403	0.430102	5.40276e-07	5e-07	4.656e-05
Gclm	trough	24	16	8	-3.50877e-08	1	2.0951	-2.5857	4.6808	-0.810267	-1.21314	0.42882	5.84153e-07	5e-07	4.656e-05
CG3699	trough	24	4	16	0.0344343	0.989934	1.64074	-2.8239	4.46464	-0.58102	-1.69551	0.426595	6.82288e-07	5e-07	4.656e-05
CG6145	trough	24	16	16	-1.75439e-08	1	2.46421	-2.34455	4.80876	-1.05104	-1.16611	0.426256	6.82288e-07	5e-07	4.656e-05
CG1441	trough	24	20	16	-3.50877e-08	1	2.16765	-2.04811	4.21576	-1.05837	-1.03287	0.425475	6.82288e-07	5e-07	4.656e-05
CG3902	trough	24	4	8	-5.26316e-08	1	1.78351	-2.24481	4.02833	-0.794504	-0.927513	0.42531	7.37055e-07	5e-07	4.656e-05
CG5945	trough	24	0	16	2.77556e-17	1	1.93776	-2.31595	4.25372	-0.836702	-1.19756	0.424866	7.37055e-07	5e-07	4.656e-05
Vdup1	trough	24	20	16	-3.50877e-08	1	1.74871	-2.71498	4.46369	-0.644097	-1.48189	0.424194	7.37055e-07	5e-07	4.656e-05
Cyp6d5	trough	24	16	16	1.26604e-17	1	1.96016	-2.07195	4.03211	-0.946044	-0.903825	0.424974	7.37055e-07	5e-07	4.656e-05
CG10126	trough	24	16	8	-3.50877e-08	1	1.96542	-2.38137	4.34679	-0.825334	-1.02728	0.423692	7.95988e-07	5e-07	4.656e-05
Buffy	trough	24	12	8	-0.0330199	0.989008	1.70437	-2.60993	4.31431	-0.653033	-1.0057	0.422133	8.59385e-07	5e-07	4.656e-05
Clk	trough	24	0	16	0.00216323	0.991321	1.8927	-2.51786	4.41056	-0.751708	-2.04647	0.421003	9.27566e-07	5e-07	4.656e-05
inaC	trough	24	4	8	-1.75439e-08	1	1.87208	-2.01762	3.8897	-0.927866	-1.27359	0.42017	1.00087e-06	5e-07	4.656e-05
CG11594	trough	24	12	8	-1.75439e-08	1	2.1285	-1.94746	4.07596	-1.09296	-1.49386	0.419571	1.00087e-06	5e-07	4.656e-05
CG8008	trough	24	20	8	5.26316e-08	1	1.91529	-2.10986	4.02515	-0.907783	-0.908478	0.419571	1.00087e-06	5e-07	4.656e-05
CG32412	trough	24	4	16	-1.75439e-08	1	1.85675	-2.46716	4.32391	-0.752588	-1.0398	0.418885	1.07966e-06	5e-07	4.656e-05
CG6836	trough	24	0	16	-1.75439e-08	1	1.70434	-2.25682	3.96117	-0.755196	-1.41209	0.417141	1.16432e-06	5e-07	4.656e-05
GXIVsPLA2	trough	24	20	8	-7.01754e-08	1	2.22668	-2.88015	5.10683	-0.773111	-1.14809	0.415727	1.25526e-06	5e-07	4.656e-05
CG5853	trough	24	20	8	-7.01754e-08	1	2.37198	-1.58261	3.95459	-1.49877	-1.03198	0.414446	1.35292e-06	5e-07	4.656e-05
CG14153	trough	24	20	8	1.75439e-08	1	2.10228	-3.44178	5.54406	-0.610813	-1.31718	0.414446	1.35292e-06	5e-07	4.656e-05
CG18598	trough	24	4	16	5.26316e-08	1	2.16482	-2.4976	4.66242	-0.86676	-1.04773	0.413746	1.45777e-06	5e-07	4.656e-05
CG9990	trough	24	20	8	-1.75439e-08	1	2.17253	-1.67301	3.84554	-1.29857	-1.01112	0.413165	1.45777e-06	5e-07	4.656e-05
CG13101	trough	24	0	16	0.000341662	0.983934	1.47469	-3.03654	4.51123	-0.48565	-1.71643	0.411991	1.57031e-06	5e-07	4.656e-05
e	trough	24	4	8	-5.26316e-08	1	2.45654	-1.74959	4.20613	-1.40406	-0.906561	0.411176	1.69106e-06	1.05e-05	0.000949281
gol	trough	24	16	8	8.77193e-08	1	1.7321	-3.1154	4.8475	-0.55598	-1.4961	0.40959	1.82058e-06	1.05e-05	0.000949281
CG16978	trough	24	8	16	-8.77193e-08	1	1.86893	-1.78451	3.65344	-1.04731	-0.902537	0.410366	1.82058e-06	1.05e-05	0.000949281
CAH1	trough	24	20	16	1.75298e-17	1	3.12382	-1.84086	4.96468	-1.69694	-0.801847	0.407534	2.1084e-06	2.05e-05	0.00173542
Ahcy89E	trough	24	12	8	1.75439e-08	1	1.48852	-2.23162	3.72015	-0.667013	-1.61336	0.40676	2.1084e-06	2.05e-05	0.00173542
CG17646	trough	24	0	16	5.26316e-08	1	2.20577	-2.48701	4.69278	-0.886913	-1.13668	0.404266	2.43901e-06	2.05e-05	0.00173542
sqh	trough	24	8	16	1.75439e-08	1	1.75575	-2.80575	4.56149	-0.625768	-1.27807	0.405236	2.43901e-06	2.05e-05	0.00173542
CG33138	trough	24	4	16	3.50877e-08	1	2.34557	-2.36565	4.71121	-0.991512	-0.565841	0.404751	2.43901e-06	2.05e-05	0.00173542
Cnx99A	trough	24	16	16	-5.26316e-08	1	1.86111	-2.16083	4.02194	-0.861297	-0.969703	0.404462	2.43901e-06	2.05e-05	0.00173542
CG18135	trough	24	16	8	-3.50877e-08	1	2.30969	-2.41222	4.72191	-0.957498	-1.00645	0.404462	2.43901e-06	2.05e-05	0.00173542
Xrp1	trough	24	4	16	-3.50877e-08	1	1.85042	-1.97735	3.82777	-0.935809	-0.789603	0.403466	2.62219e-06	3.05e-05	0.00240691
CG13868	trough	24	16	8	-3.50877e-08	1	2.45995	-1.97406	4.43401	-1.24613	-0.833248	0.40318	2.62219e-06	3.05e-05	0.00240691
Sesn	trough	24	8	16	1.75439e-08	1	2.87742	-2.31964	5.19706	-1.24046	-1.12363	0.402671	2.81836e-06	3.05e-05	0.00240691
CG6356	trough	24	4	16	-5.26316e-08	1	1.77426	-2.46832	4.24258	-0.718812	-1.31617	0.402181	2.81836e-06	3.05e-05	0.00240691
CG9363	trough	24	4	8	0.00997807	1.018	2.33581	-2.77025	5.10606	-0.843177	-1.54318	0.402181	2.81836e-06	3.05e-05	0.00240691
CG11889	trough	24	20	16	-8.77193e-08	1	1.76524	-3.25347	5.01871	-0.542571	-2.44354	0.402407	2.81836e-06	3.05e-05	0.00240691
CG10799	trough	24	20	16	8.77193e-08	1	2.23958	-1.63788	3.87747	-1.36736	-1.19733	0.401126	3.02838e-06	3.05e-05	0.00240691
Cyp313a1	trough	24	16	8	-7.79104e-18	1	2.26413	-3.23755	5.50168	-0.699335	-1.19238	0.399334	3.25316e-06	3.05e-05	0.00240691
UGP	trough	24	4	16	3.50877e-08	1	2.12787	-2.22016	4.34803	-0.958431	-0.989888	0.398327	3.49367e-06	4.05e-05	0.0031428
Pino	trough	24	12	16	3.50877e-08	1	3.59004	-2.08884	5.67888	-1.71868	-1.04083	0.399073	3.49367e-06	4.05e-05	0.0031428
sn	trough	24	20	8	3.50877e-08	1	2.64443	-1.80317	4.44761	-1.46654	-0.925411	0.39651	4.02609e-06	8.05e-05	0.00599693
ATPCL	trough	24	8	16	1.75439e-08	1	1.98403	-1.84347	3.82749	-1.07625	-1.34622	0.394977	4.32024e-06	8.05e-05	0.00599693
GstD3	trough	24	4	16	7.79104e-18	1	2.70505	-2.01189	4.71695	-1.34453	-0.950643	0.394472	4.32024e-06	8.05e-05	0.00599693
GstE3	trough	24	0	16	1.75439e-08	1	2.04057	-2.2473	4.28787	-0.90801	-1.16929	0.395254	4.32024e-06	8.05e-05	0.00599693
Obp99a	trough	24	12	16	5.26316e-08	1	2.08806	-2.32964	4.4177	-0.896303	-1.32856	0.395229	4.32024e-06	8.05e-05	0.00599693
CG1561	trough	24	16	8	-5.84328e-18	1	1.83285	-2.53115	4.36401	-0.724118	-1.69639	0.391643	4.97059e-06	9.05e-05	0.00638436
CG10345	trough	24	12	8	7.01754e-08	1	1.669	-2.44367	4.11267	-0.682988	-1.08183	0.392667	4.97059e-06	9.05e-05	0.00638436
CG42542	trough	24	20	8	1.75439e-08	1	1.83394	-3.03465	4.86859	-0.604333	-1.1453	0.392667	4.97059e-06	9.05e-05	0.00638436
CG5653	trough	24	0	16	-1.75439e-08	1	2.01213	-2.77822	4.79036	-0.724253	-1.03413	0.391391	5.32946e-06	9.05e-05	0.00638436
rost	trough	24	0	16	-3.50877e-08	1	2.33847	-2.06443	4.4029	-1.13274	-1.05369	0.391391	5.32946e-06	9.05e-05	0.00638436
Rh6	trough	24	8	16	5.26316e-08	1	1.98292	-2.59862	4.58154	-0.763066	-1.0516	0.389847	5.71272e-06	9.05e-05	0.00638436
CG14290	trough	24	0	8	3.50877e-08	1	1.69274	-2.19238	3.88511	-0.772102	-1.10577	0.390104	5.71272e-06	9.05e-05	0.00638436
CG4074	trough	24	20	16	-0.00769525	0.995366	1.71693	-3.51745	5.23438	-0.488119	-1.25612	0.38831	6.12192e-06	0.0001005	0.00703651
CG13305	trough	24	4	8	0.03515	1.0442	2.68819	-2.53234	5.22053	-1.06155	-0.878894	0.386762	6.55869e-06	0.0001105	0.0074027
Rad51C	trough	24	20	8	-0.0417939	0.988989	1.59364	-2.02606	3.6197	-0.786574	-0.876093	0.387543	6.55869e-06	0.0001105	0.0074027
CG17211	trough	24	12	8	9.25186e-18	1	1.69572	-2.51036	4.20609	-0.67549	-1.30281	0.386261	7.02476e-06	0.0001105	0.0074027
CG10743	trough	24	4	16	-0.024875	1.00852	1.82816	-2.50819	4.33634	-0.728876	-1.40084	0.385477	7.02476e-06	0.0001105	0.0074027
CG5687	trough	24	20	8	-5.26316e-08	1	1.72025	-2.70391	4.42416	-0.636206	-1.51416	0.386261	7.02476e-06	0.0001105	0.0074027
Hmgs	trough	24	20	8	-5.26316e-08	1	2.60004	-1.97762	4.57766	-1.31473	-0.946679	0.386261	7.02476e-06	0.0001105	0.0074027
aralar1	trough	24	0	16	1.75439e-08	1	1.75154	-3.02871	4.78026	-0.578313	-1.51591	0.384954	7.52198e-06	0.0001205	0.00795812
CG6084	trough	24	4	16	1.75439e-08	1	1.69319	-2.61612	4.30931	-0.647215	-1.04139	0.384192	7.52198e-06	0.0001205	0.00795812
CG17221	trough	24	0	16	-3.50877e-08	1	1.86099	-2.70896	4.56995	-0.686974	-1.14878	0.383667	8.05227e-06	0.0001305	0.00810144
CG30054	trough	24	4	8	-1.05263e-07	1	1.84563	-2.4777	4.32332	-0.744896	-1.36757	0.382908	8.05227e-06	0.0001305	0.00810144
Cyp305a1	trough	24	4	8	-7.79104e-18	1	1.70923	-3.0813	4.79053	-0.554709	-1.31715	0.382908	8.05227e-06	0.0001305	0.00810144
rtp	trough	24	4	16	3.50877e-08	1	1.88414	-1.79759	3.68173	-1.04815	-1.04018	0.382908	8.05227e-06	0.0001305	0.00810144
CG4019	trough	24	4	16	-1.75439e-08	1	2.5742	-2.53625	5.11045	-1.01496	-0.903548	0.382908	8.05227e-06	0.0001305	0.00810144
verm	trough	24	4	8	1.75439e-08	1	2.00479	-1.60915	3.61393	-1.24587	-0.951816	0.382908	8.05227e-06	0.0001305	0.00810144
CG4825	trough	24	20	8	7.01754e-08	1	1.83007	-3.57031	5.40038	-0.512582	-1.39886	0.383699	8.05227e-06	0.0001305	0.00810144
smp-30	trough	24	4	16	-5.26316e-08	1	1.95507	-1.52982	3.48488	-1.27797	-0.76032	0.381623	8.61768e-06	0.0001305	0.00810144
Eb1	trough	24	8	16	2.33731e-17	1	2.76702	-1.72249	4.48951	-1.60641	-0.964982	0.382153	8.61768e-06	0.0001305	0.00810144
CG34398	trough	24	8	16	0.0640156	1.03455	2.09125	-2.33102	4.42227	-0.89714	-1.3779	0.380871	9.2204e-06	0.0001405	0.00860747
lqf	trough	24	4	8	-1.82602e-17	1	1.98752	-2.30086	4.28838	-0.863817	-1.17283	0.380338	9.2204e-06	0.0001405	0.00860747
CG9705	trough	24	12	16	3.50877e-08	1	2.15712	-2.02939	4.1865	-1.06294	-0.851892	0.379856	9.86269e-06	0.0001505	0.0087591
CG15630	trough	24	0	8	0.0222466	1.00619	2.11654	-1.97611	4.09265	-1.07106	-1.17176	0.379804	9.86269e-06	0.0001505	0.0087591
Trx-2	trough	24	4	16	-1.75439e-08	1	1.76907	-3.14975	4.91882	-0.561654	-1.15209	0.379053	1.0547e-05	0.0001505	0.0087591
CG3363	trough	24	20	8	1.16866e-17	1	2.23438	-2.18083	4.41521	-1.02455	-0.94836	0.378575	1.0547e-05	0.0001505	0.0087591
CG9377	trough	24	4	16	-0.0600618	0.992041	1.58834	-2.02839	3.61674	-0.783055	-0.944742	0.379053	1.0547e-05	0.0001505	0.0087591
Cyp18a1	trough	24	16	8	-1.75439e-08	1	2.15999	-1.93145	4.09144	-1.11833	-1.20768	0.378823	1.0547e-05	0.0001505	0.0087591
Marf	trough	24	16	16	-7.01754e-08	1	2.79238	-1.816	4.60837	-1.53766	-0.679241	0.378823	1.0547e-05	0.0001505	0.0087591
CG12177	trough	24	20	8	0.0115193	0.976639	1.96009	-1.98369	3.94378	-0.988099	-1.11594	0.377294	1.12758e-05	0.0001505	0.0087591
CG9686	trough	24	4	16	7.01754e-08	1	2.49005	-2.20678	4.69683	-1.12837	-1.081	0.376483	1.20519e-05	0.0001705	0.00956443
kar	trough	24	8	8	-1.75439e-08	1	2.49925	-2.20547	4.70472	-1.1332	-1.03601	0.375741	1.20519e-05	0.0001705	0.00956443
mRpS33	trough	24	0	8	0.0338034	0.998612	1.76455	-2.84568	4.61023	-0.620081	-2.2315	0.375942	1.20519e-05	0.0001705	0.00956443
CG9372	trough	24	4	16	-1.16866e-17	1	2.85065	-1.6541	4.50475	-1.72339	-1.07902	0.375198	1.28782e-05	0.0001705	0.00956443
CG7300	trough	24	20	16	-3.50877e-08	1	1.65552	-2.40665	4.06218	-0.687894	-1.06218	0.374213	1.28782e-05	0.0001705	0.00956443
ckd	trough	24	20	16	-0.0309635	0.994509	1.47795	-2.89519	4.37314	-0.510486	-1.36404	0.374213	1.28782e-05	0.0001705	0.00956443
HLH106	trough	24	8	16	1.75439e-08	1	1.99545	-2.77897	4.77442	-0.718052	-0.974581	0.373176	1.37575e-05	0.0001805	0.00994565
TwdlBeta	trough	24	4	16	-0.00151509	0.991254	1.96832	-3.46641	5.43474	-0.567827	-1.51569	0.373913	1.37575e-05	0.0001805	0.00994565
Timp	trough	24	20	8	1.75439e-08	1	2.20692	-2.58146	4.78838	-0.854912	-1.39569	0.37345	1.37575e-05	0.0001805	0.00994565
Inos	trough	24	8	16	3.89552e-18	1	2.2003	-2.32865	4.52895	-0.944883	-1.01485	0.371894	1.4693e-05	0.0002005	0.0107922
Tsp42Ed	trough	24	20	8	3.50877e-08	1	2.49935	-2.0676	4.56695	-1.20882	-1.0352	0.372169	1.4693e-05	0.0002005	0.0107922
CG31248	trough	24	20	8	-7.01754e-08	1	1.90897	-1.88328	3.79224	-1.01364	-1.15469	0.372169	1.4693e-05	0.0002005	0.0107922
CG1600	trough	24	16	16	-1.75439e-08	1	2.52954	-1.89704	4.42657	-1.33342	-0.805698	0.371131	1.56882e-05	0.0002005	0.0107922
Hrs	trough	24	12	8	5.26316e-08	1	1.78474	-2.2064	3.99114	-0.808893	-1.00314	0.369607	1.67466e-05	0.0002205	0.0114072
CG4511	trough	24	4	16	3.89552e-18	1	2.08014	-1.97413	4.05427	-1.0537	-1.0041	0.370058	1.67466e-05	0.0002205	0.0114072
CG7267	trough	24	4	8	1.75439e-08	1	2.13554	-2.37741	4.51295	-0.898266	-0.97677	0.370058	1.67466e-05	0.0002205	0.0114072
ERp60	trough	24	8	16	3.50877e-08	1	1.58369	-2.53745	4.12114	-0.624126	-1.56324	0.369329	1.67466e-05	0.0002205	0.0114072
MAPk-Ak2	trough	24	8	16	7.01754e-08	1	2.03498	-2.64949	4.68447	-0.768066	-0.760695	0.369329	1.67466e-05	0.0002205	0.0114072
dx	trough	24	4	16	-1.75439e-08	1	2.01238	-3.34894	5.36132	-0.600901	-1.55494	0.370058	1.67466e-05	0.0002205	0.0114072
CG9396	trough	24	0	16	-0.014102	0.996791	1.72962	-2.69227	4.42189	-0.64244	-1.06366	0.369504	1.67466e-05	0.0002205	0.0114072
CG4389	trough	24	4	16	-5.26316e-08	1	2.34347	-1.91412	4.2576	-1.22431	-0.855194	0.368773	1.78718e-05	0.0002305	0.0118586
CG15211	trough	24	4	16	1.36343e-17	1	2.06589	-2.4127	4.4786	-0.856257	-1.018	0.367488	1.90677e-05	0.0002605	0.0128348
CG5254	trough	24	4	16	0.00626847	0.992299	2.12057	-2.23824	4.3588	-0.947428	-1.35577	0.367488	1.90677e-05	0.0002605	0.0128348
CG9027	trough	24	4	16	8.77193e-08	1	2.12221	-2.13791	4.26012	-0.992657	-1.14517	0.367488	1.90677e-05	0.0002605	0.0128348
tws	trough	24	8	16	3.50877e-08	1	1.85452	-2.19747	4.05199	-0.843936	-1.17873	0.365482	2.03386e-05	0.0002605	0.0128348
CG6272	trough	24	8	16	-5.26316e-08	1	1.84152	-1.99084	3.83237	-0.924996	-1.5597	0.365482	2.03386e-05	0.0002605	0.0128348
Drip	trough	24	12	8	-5.26316e-08	1	1.75355	-2.6672	4.42075	-0.657451	-1.65939	0.365763	2.03386e-05	0.0002605	0.0128348
Ance-3	trough	24	8	16	3.50877e-08	1	2.15157	-2.47225	4.62382	-0.870288	-1.15388	0.365482	2.03386e-05	0.0002605	0.0128348
CG11275	trough	24	0	8	-0.0108662	1.02204	2.00143	-2.42375	4.42518	-0.82576	-1.13434	0.365642	2.03386e-05	0.0002605	0.0128348
CG14186	trough	24	8	16	-3.50877e-08	1	2.04482	-2.6268	4.67162	-0.778445	-0.970439	0.3642	2.16886e-05	0.0002905	0.014163
CG9837	trough	24	16	8	-0.0192648	1.00162	2.50638	-3.5972	6.10358	-0.696757	-1.18915	0.364721	2.16886e-05	0.0002905	0.014163
Lsd-1	trough	24	8	8	-1.75439e-08	1	2.24174	-2.7809	5.02264	-0.806121	-1.37577	0.362917	2.31225e-05	0.0003205	0.0154637
CG15717	trough	24	12	8	0.0118994	0.996795	1.98422	-3.07172	5.05594	-0.645965	-1.41816	0.363201	2.31225e-05	0.0003205	0.0154637
ninaA	trough	24	20	16	1.75439e-08	1	1.9694	-3.23815	5.20755	-0.608189	-1.0648	0.362679	2.4645e-05	0.0003605	0.017304
Sodh-1	trough	24	12	8	-3.50877e-08	1	2.05919	-2.257	4.31619	-0.912361	-1.12664	0.360639	2.62612e-05	0.0003705	0.0174247
CG9510	trough	24	12	8	-3.50877e-08	1	2.17335	-2.51419	4.68754	-0.864433	-1.01367	0.360639	2.62612e-05	0.0003705	0.0174247
CG9427	trough	24	0	16	-8.77193e-08	1	1.92289	-2.3053	4.22818	-0.834116	-1.15395	0.360492	2.62612e-05	0.0003705	0.0174247
Epac	trough	24	16	16	1.94776e-18	1	1.71548	-2.55103	4.26651	-0.672465	-1.16527	0.360875	2.62612e-05	0.0003705	0.0174247
Nep4	trough	24	4	8	-3.50877e-08	1	2.12133	-2.79962	4.92096	-0.757722	-1.19063	0.359779	2.79764e-05	0.0004105	0.0187354
CG11686	trough	24	4	8	5.26316e-08	1	2.10765	-2.49372	4.60137	-0.845183	-1.1617	0.359779	2.79764e-05	0.0004105	0.0187354
Gapdh2	trough	24	4	16	1.75439e-08	1	2.71708	-1.68084	4.39792	-1.61651	-0.680415	0.359779	2.79764e-05	0.0004105	0.0187354
CG9914	trough	24	12	8	-1.55821e-17	1	2.10766	-2.29263	4.40029	-0.919321	-0.987361	0.359358	2.79764e-05	0.0004105	0.0187354
cact	trough	24	20	16	5.26316e-08	1	2.55974	-3.18784	5.74758	-0.80297	-1.32141	0.360116	2.79764e-05	0.0004105	0.0187354
NAT1	trough	24	8	16	5.26316e-08	1	2.96906	-2.57935	5.54841	-1.15109	-0.798068	0.357788	2.97961e-05	0.0004205	0.0187354
CG7546	trough	24	4	16	1.75439e-08	1	3.50431	-1.63404	5.13835	-2.14456	-1.05852	0.357209	3.17264e-05	0.0004205	0.0187354
CG31075	trough	24	4	16	7.79104e-18	1	1.67667	-2.35064	4.02731	-0.713286	-1.02308	0.357209	3.17264e-05	0.0004205	0.0187354
CG12016	trough	24	16	8	1.75439e-08	1	2.06166	-2.17799	4.23965	-0.946591	-1.02199	0.357029	3.17264e-05	0.0004205	0.0187354
CG33116	trough	24	16	8	-1.55821e-17	1	1.99909	-2.15782	4.15691	-0.926437	-1.24088	0.357029	3.17264e-05	0.0004205	0.0187354
CG4822	trough	24	20	8	-3.50877e-08	1	2.17564	-3.08363	5.25926	-0.705545	-0.96075	0.356795	3.17264e-05	0.0004205	0.0187354
Mp20	trough	24	4	16	-4.28507e-17	1	1.62243	-3.59655	5.21898	-0.451108	-1.67092	0.355924	3.37734e-05	0.0004405	0.0191679
Npc2a	trough	24	8	8	-1.75439e-08	1	2.26942	-2.14545	4.41487	-1.05778	-1.08545	0.356505	3.37734e-05	0.0004405	0.0191679
Hnf4	trough	24	20	8	-3.50877e-08	1	2.11839	-2.45299	4.57139	-0.863595	-0.890084	0.355514	3.37734e-05	0.0004405	0.0191679
CG10175	trough	24	16	16	0.0159873	0.970563	1.50683	-2.50438	4.0112	-0.601676	-1.38608	0.355747	3.37734e-05	0.0004405	0.0191679
rho	trough	24	20	8	3.50877e-08	1	2.92276	-1.99155	4.91432	-1.46758	-1.01456	0.355514	3.37734e-05	0.0004405	0.0191679
CG1124	trough	24	4	16	-3.50877e-08	1	2.08342	-2.08833	4.17175	-0.99765	-0.973818	0.354639	3.59435e-05	0.0005005	0.0214777
CG12116	trough	24	4	8	1.75439e-08	1	1.83256	-3.69491	5.52747	-0.49597	-1.23582	0.354639	3.59435e-05	0.0005005	0.0214777
alc	trough	24	4	8	3.50877e-08	1	2.35332	-1.84621	4.19953	-1.27468	-0.992985	0.354639	3.59435e-05	0.0005005	0.0214777
GstE2	trough	24	4	8	-1.75439e-08	1	1.67468	-3.48682	5.1615	-0.480289	-1.10847	0.353354	3.82437e-05	0.0005105	0.0215103
Cyt-c-p	trough	24	0	8	3.50877e-08	1	1.82082	-3.10418	4.925	-0.586571	-1.04752	0.352767	3.82437e-05	0.0005105	0.0215103
Hr78	trough	24	8	16	1.55821e-17	1	2.2331	-1.87766	4.11076	-1.1893	-1.1688	0.35394	3.82437e-05	0.0005105	0.0215103
CG17324	trough	24	20	16	-0.0419395	0.965146	2.06209	-3.31492	5.37701	-0.622063	-1.05419	0.353708	3.82437e-05	0.0005105	0.0215103
CG32573	trough	24	16	8	3.89552e-18	1	2.60602	-2.53434	5.14036	-1.02828	-1.22709	0.351901	4.06811e-05	0.0005305	0.0218585
CG6834	trough	24	8	8	-0.016888	0.999214	1.7819	-2.43082	4.21272	-0.733044	-0.940032	0.352658	4.06811e-05	0.0005305	0.0218585
CG13443	trough	24	16	8	0.0144568	0.997076	1.75927	-3.17839	4.93766	-0.553509	-3.01692	0.351901	4.06811e-05	0.0005305	0.0218585
CG14898	trough	24	16	16	1.94776e-18	1	2.83784	-2.50054	5.33838	-1.13489	-1.26488	0.351901	4.06811e-05	0.0005305	0.0218585
Synd	trough	24	20	8	3.50877e-08	1	3.45812	-2.09383	5.55196	-1.65158	-1.02907	0.351671	4.06811e-05	0.0005305	0.0218585
sd	trough	24	8	8	-0.0178413	1.00731	1.81403	-3.25688	5.07092	-0.556984	-1.09141	0.351376	4.32633e-05	0.0005505	0.0224836
CG10960	trough	24	4	16	1.75439e-08	1	2.26228	-1.75221	4.01449	-1.2911	-0.97426	0.350784	4.32633e-05	0.0005505	0.0224836
Pgi	trough	24	8	16	-1.75439e-08	1	3.05689	-1.87051	4.9274	-1.63425	-1.02535	0.350093	4.5998e-05	0.0005905	0.023804
CG17777	trough	24	20	16	1.75439e-08	1	1.55203	-2.71822	4.27025	-0.570973	-1.35003	0.349864	4.5998e-05	0.0005905	0.023804
CG9444	trough	24	4	16	3.50877e-08	1	2.03637	-2.29618	4.33255	-0.886851	-1.54626	0.3495	4.5998e-05	0.0005905	0.023804
CG10069	trough	24	8	8	0.00314806	0.983673	2.23309	-2.33707	4.57016	-0.955506	-1.00914	0.348811	4.88938e-05	0.0006105	0.0245042
MED19	trough	24	4	16	1.94776e-17	1	1.98236	-1.73647	3.71883	-1.1416	-0.999645	0.34693	5.19592e-05	0.0006405	0.0252726
CG8417	trough	24	8	8	-3.89552e-18	1	2.66944	-2.12157	4.79101	-1.25823	-1.16268	0.347528	5.19592e-05	0.0006405	0.0252726
kraken	trough	24	12	8	-5.26316e-08	1	2.35055	-1.92887	4.27942	-1.21861	-0.970408	0.346546	5.19592e-05	0.0006405	0.0252726
CG16704	trough	24	16	8	1.08344e-17	1	1.96507	-2.47348	4.43855	-0.794457	-0.871305	0.346773	5.19592e-05	0.0006405	0.0252726
out	trough	24	12	8	-7.01754e-08	1	1.82952	-2.24104	4.07057	-0.81637	-0.786093	0.345265	5.52034e-05	0.0006705	0.026234
CG13833	trough	24	0	8	-0.00779608	0.992905	2.02244	-3.26515	5.28759	-0.6194	-1.13826	0.34633	5.52034e-05	0.0006705	0.026234
Fmo-2	trough	24	20	16	-0.00636974	0.992335	1.98517	-2.81361	4.79878	-0.705557	-1.11708	0.344738	5.8636e-05	0.0006905	0.0269035
Acer	trough	24	8	16	5.26316e-08	1	2.06493	-1.87935	3.94429	-1.09875	-0.812231	0.343681	6.2267e-05	0.0007105	0.0273396
CG9691	trough	24	8	8	1.75439e-08	1	2.23773	-2.9071	5.14483	-0.769744	-1.14115	0.343681	6.2267e-05	0.0007105	0.0273396
l(2)05510	trough	24	0	8	1.75439e-08	1	2.20092	-3.03888	5.2398	-0.724254	-1.54804	0.343755	6.2267e-05	0.0007105	0.0273396
Est-Q	trough	24	8	16	1.75439e-08	1	1.86871	-2.29814	4.16685	-0.813137	-1.21429	0.342399	6.61069e-05	0.0007605	0.0287877
robl37BC	trough	24	12	16	5.26316e-08	1	2.02585	-1.96386	3.98971	-1.03156	-1.37933	0.342703	6.61069e-05	0.0007605	0.0287877
CG11073	trough	24	4	16	-1.75439e-08	1	1.94059	-2.55451	4.4951	-0.759673	-1.11337	0.34179	6.61069e-05	0.0007605	0.0287877
CG6330	trough	24	20	8	-1.75439e-08	1	2.82542	-2.12799	4.95341	-1.32775	-0.972403	0.342703	6.61069e-05	0.0007605	0.0287877
hgo	trough	24	4	8	0.00643326	0.992358	2.02354	-1.87257	3.89611	-1.08063	-1.01056	0.340505	7.01668e-05	0.0008205	0.0298457
SC35	trough	24	12	16	1.75439e-08	1	3.22025	-2.14663	5.36688	-1.50014	-1.24742	0.341422	7.01668e-05	0.0008205	0.0298457
Cht4	trough	24	8	8	3.50877e-08	1	1.78893	-2.15312	3.94206	-0.830854	-0.998059	0.341116	7.01668e-05	0.0008205	0.0298457
CG10680	trough	24	4	16	3.50877e-08	1	2.00517	-2.51808	4.52325	-0.79631	-1.13678	0.340505	7.01668e-05	0.0008205	0.0298457
CG2852	trough	24	8	16	3.50877e-08	1	2.72707	-2.16468	4.89176	-1.2598	-1.08595	0.341116	7.01668e-05	0.0008205	0.0298457
CG6282	trough	24	0	16	-0.0275498	1.06762	2.29673	-3.08472	5.38145	-0.74455	-0.987342	0.34118	7.01668e-05	0.0008205	0.0298457
CG1461	trough	24	4	16	3.50877e-08	1	2.0647	-2.34173	4.40643	-0.881697	-1.25708	0.340505	7.01668e-05	0.0008205	0.0298457
spict	trough	24	8	16	-0.00786804	0.992936	2.05729	-2.63996	4.69725	-0.779288	-0.822577	0.341116	7.01668e-05	0.0008205	0.0298457
CG9272	trough	24	4	8	-0.00577935	0.992132	1.80606	-3.48088	5.28694	-0.518852	-1.50649	0.340505	7.01668e-05	0.0008205	0.0298457
CG8798	trough	24	12	16	-8.77193e-08	1	2.12162	-2.00956	4.13118	-1.05576	-1.15361	0.341422	7.01668e-05	0.0008205	0.0298457
DnaJ-1	trough	24	8	8	2.33731e-17	1	1.57754	-2.46023	4.03777	-0.641215	-1.38626	0.339834	7.44582e-05	0.0008705	0.0311773
Got2	trough	24	8	8	-1.75439e-08	1	2.00063	-1.87281	3.87344	-1.06825	-0.96343	0.339834	7.44582e-05	0.0008705	0.0311773
cathD	trough	24	8	16	-1.75439e-08	1	2.46253	-2.18807	4.65061	-1.12543	-1.08628	0.339834	7.44582e-05	0.0008705	0.0311773
CG31549	trough	24	8	16	1.75439e-08	1	2.35934	-2.43176	4.7911	-0.970217	-1.50905	0.339834	7.44582e-05	0.0008705	0.0311773
CG5793	trough	24	4	8	1.75439e-08	1	2.28735	-2.0499	4.33725	-1.11584	-0.916748	0.337935	7.89932e-05	0.0009105	0.0319946
CG4597	trough	24	4	8	0.0348548	0.939347	1.68594	-3.04699	4.73294	-0.553313	-2.31619	0.337935	7.89932e-05	0.0009105	0.0319946
plx	trough	24	16	8	1.75439e-08	1	3.23719	-2.14871	5.3859	-1.50657	-0.932773	0.3378	7.89932e-05	0.0009105	0.0319946
alpha-Est7	trough	24	8	16	1.75439e-08	1	3.07406	-2.34376	5.41782	-1.31159	-0.915353	0.338552	7.89932e-05	0.0009105	0.0319946
CG4572	trough	24	20	8	5.26316e-08	1	1.97038	-1.90807	3.87845	-1.03266	-0.866656	0.33886	7.89932e-05	0.0009105	0.0319946
CG11852	trough	24	8	16	0.0175901	0.999891	1.90452	-3.11018	5.0147	-0.612352	-1.11179	0.337269	8.37844e-05	0.0010105	0.034851
pio	trough	24	8	16	-1.05263e-07	1	2.41127	-2.09078	4.50205	-1.15329	-0.896522	0.337269	8.37844e-05	0.0010105	0.034851
CG10353	trough	24	0	16	0.0164628	0.998816	1.57382	-3.31562	4.88944	-0.47467	-2.05401	0.337318	8.37844e-05	0.0010105	0.034851
Cpr67B	trough	24	0	8	1.75439e-08	1	2.16632	-2.17268	4.339	-0.997075	-1.22515	0.337318	8.37844e-05	0.0010105	0.034851
mRpS11	trough	24	16	16	-1.55821e-17	1	1.86906	-2.63736	4.50643	-0.708685	-1.1113	0.336518	8.37844e-05	0.0010105	0.034851
Jheh2	trough	24	4	8	1.75439e-08	1	2.35971	-2.1678	4.52751	-1.08853	-0.881597	0.335365	8.88451e-05	0.0010805	0.0356306
Cyp4e3	trough	24	8	16	0.0188136	1.02606	1.93498	-2.14092	4.0759	-0.903807	-1.21899	0.335987	8.88451e-05	0.0010805	0.0356306
CG7322	trough	24	12	8	-1.75439e-08	1	2.09686	-3.61374	5.7106	-0.580246	-1.75518	0.336297	8.88451e-05	0.0010805	0.0356306
CG10205	trough	24	4	16	-1.75439e-08	1	2.02037	-2.19685	4.21721	-0.919668	-2.10838	0.335365	8.88451e-05	0.0010805	0.0356306
CG7627	trough	24	16	16	0.00273466	0.968405	2.56473	-2.22131	4.78604	-1.1546	-0.786679	0.335236	8.88451e-05	0.0010805	0.0356306
CG7724	trough	24	0	16	5.26316e-08	1	2.38698	-2.20728	4.59426	-1.08141	-1.24835	0.33603	8.88451e-05	0.0010805	0.0356306
aay	trough	24	8	8	-8.77193e-08	1	2.41806	-2.04267	4.46073	-1.18378	-1.20278	0.335987	8.88451e-05	0.0010805	0.0356306
Cyp6a20	trough	24	20	16	5.26316e-08	1	2.01015	-4.22311	6.23327	-0.475988	-1.08344	0.335767	8.88451e-05	0.0010805	0.0356306
CG16743	trough	24	0	16	-2.72686e-17	1	1.9922	-2.11736	4.10956	-0.940886	-0.866178	0.334743	9.41892e-05	0.0010905	0.0356306
CG32444	trough	24	4	16	1.75439e-08	1	1.83883	-3.51373	5.35256	-0.523328	-1.25605	0.33408	9.41892e-05	0.0010905	0.0356306
Gbeta76C	trough	24	4	8	-1.26604e-17	1	2.2922	-2.02112	4.31333	-1.13412	-1.33586	0.33408	9.41892e-05	0.0010905	0.0356306
CG5362	trough	24	4	16	3.50877e-08	1	1.8612	-2.5338	4.395	-0.734548	-1.13841	0.33408	9.41892e-05	0.0010905	0.0356306
CG32537	trough	24	12	16	-0.015011	0.985271	1.69488	-3.5796	5.27447	-0.473483	-1.4917	0.335016	9.41892e-05	0.0010905	0.0356306
CG11893	trough	24	4	16	-0.171302	1.02222	2.30149	-2.19267	4.49416	-1.04963	-0.532881	0.33408	9.41892e-05	0.0010905	0.0356306
JhI-26	trough	24	20	16	-0.0128918	0.995873	2.22548	-1.89727	4.12275	-1.17299	-0.860883	0.334485	9.41892e-05	0.0010905	0.0356306
CG3940	trough	24	12	8	7.01754e-08	1	1.43231	-3.2938	4.72611	-0.434851	-1.50974	0.333735	9.98311e-05	0.0011305	0.0368084
Cyp1	trough	24	4	16	-3.50877e-08	1	1.78337	-2.9837	4.76708	-0.597706	-1.35585	0.331511	0.000105786	0.0012405	0.039696
GstD9	trough	24	8	8	-3.50877e-08	1	2.04439	-2.31258	4.35697	-0.884032	-0.917971	0.33214	0.000105786	0.0012405	0.039696
CG32447	trough	24	12	8	0.0288969	1.15235	2.98047	-3.03089	6.01136	-0.983363	-1.263	0.332454	0.000105786	0.0012405	0.039696
pst	trough	24	16	16	7.01754e-08	1	2.34824	-2.09262	4.44085	-1.12215	-1.19754	0.332672	0.000105786	0.0012405	0.039696
CG5161	trough	24	20	8	-1.75439e-08	1	1.87477	-2.58727	4.46204	-0.724613	-1.28906	0.332454	0.000105786	0.0012405	0.039696
Cyp4aa1	trough	24	0	16	5.26316e-08	1	1.97361	-4.29408	6.26769	-0.45961	-1.60363	0.33088	0.00011207	0.0013105	0.0412276
Kap-alpha1	trough	24	8	16	-5.26316e-08	1	2.05376	-2.45343	4.50719	-0.837097	-0.850261	0.330857	0.00011207	0.0013105	0.0412276
Got1	trough	24	4	16	-3.50877e-08	1	2.24995	-2.53058	4.78053	-0.889103	-1.12506	0.330226	0.00011207	0.0013105	0.0412276
CG4585	trough	24	8	16	1.16866e-17	1	3.07456	-2.42749	5.50206	-1.26656	-0.939978	0.330857	0.00011207	0.0013105	0.0412276
lbk	trough	24	20	16	7.01754e-08	1	2.19446	-2.08334	4.2778	-1.05334	-1.17707	0.33064	0.00011207	0.0013105	0.0412276
CG9717	trough	24	20	8	-7.79104e-18	1	2.4605	-2.3592	4.8197	-1.04294	-0.822912	0.329892	0.000118699	0.0013505	0.0415045
Hsp22	trough	24	8	16	-1.75439e-08	1	2.00802	-2.16476	4.17278	-0.927595	-0.910494	0.329575	0.000118699	0.0013505	0.0415045
CG12159	trough	24	8	8	-1.75439e-08	1	2.06044	-2.63584	4.69627	-0.781701	-1.25858	0.329575	0.000118699	0.0013505	0.0415045
CG7079	trough	24	0	16	-5.26316e-08	1	2.20958	-2.21236	4.42194	-0.998744	-1.00283	0.329593	0.000118699	0.0013505	0.0415045
GstE1	trough	24	8	8	-7.01754e-08	1	1.54581	-2.51131	4.05712	-0.615538	-1.53009	0.329575	0.000118699	0.0013505	0.0415045
CG13604	trough	24	12	16	1.75439e-08	1	1.67927	-2.54043	4.21969	-0.661019	-1.32508	0.329892	0.000118699	0.0013505	0.0415045
CHKov2	trough	24	20	16	0.00264874	0.956919	1.84121	-3.00165	4.84287	-0.613399	-1.3032	0.329359	0.000118699	0.0013505	0.0415045
CG7299	trough	24	16	8	-1.75439e-08	1	1.83513	-2.56109	4.39621	-0.716543	-1.17912	0.328826	0.000125691	0.0014105	0.042098
bbx	trough	24	20	16	3.50877e-08	1	1.80702	-2.40872	4.21574	-0.750201	-1.97937	0.328077	0.000125691	0.0014105	0.042098
CG9119	trough	24	8	16	0.0345127	1.02611	2.40492	-2.6063	5.01122	-0.922732	-1.59301	0.328293	0.000125691	0.0014105	0.042098
CG3308	trough	24	8	16	-3.50877e-08	1	1.78719	-2.03397	3.82116	-0.878673	-1.1664	0.328293	0.000125691	0.0014105	0.042098
CG12130	trough	24	8	16	1.05263e-07	1	1.92973	-2.31013	4.23987	-0.835333	-0.861323	0.328293	0.000125691	0.0014105	0.042098
Mipp1	trough	24	0	8	-7.01754e-08	1	2.2005	-2.51984	4.72034	-0.873273	-1.29725	0.328305	0.000125691	0.0014105	0.042098
SCAP	trough	24	4	8	-0.0580745	0.994672	2.72471	-2.76032	5.48503	-0.987099	-1.44069	0.328941	0.000125691	0.0014105	0.042098
CG3244	trough	24	20	8	5.26316e-08	1	1.71796	-2.85952	4.57748	-0.600785	-1.07373	0.32861	0.000125691	0.0014105	0.042098
CG15213	trough	24	0	16	-0.017572	0.981582	1.43821	-3.50675	4.94496	-0.410125	-0.961603	0.328305	0.000125691	0.0014105	0.042098
Rh5	trough	24	16	16	-5.26316e-08	1	2.65184	-2.68087	5.33271	-0.989174	-0.740396	0.327544	0.000133063	0.0015105	0.044232
GstE9	trough	24	4	8	3.89552e-18	1	1.50351	-2.69499	4.1985	-0.557891	-1.36795	0.327656	0.000133063	0.0015105	0.044232
CG8860	trough	24	12	8	-5.26316e-08	1	2.0954	-2.31177	4.40717	-0.906408	-0.954562	0.327329	0.000133063	0.0015105	0.044232
Nmnat	trough	24	12	16	-8.77193e-08	1	1.77489	-3.68945	5.46434	-0.481072	-1.57771	0.327329	0.000133063	0.0015105	0.044232
Syx4	trough	24	20	16	0.0421428	0.943973	2.09657	-1.895	3.99157	-1.10637	-1.26761	0.326796	0.000133063	0.0015105	0.044232
CG31189	trough	24	4	8	-1.75439e-08	1	1.99672	-2.34593	4.34264	-0.851142	-1.20627	0.327656	0.000133063	0.0015105	0.044232
CG16941	trough	24	16	8	5.35634e-18	1	2.49865	-2.8612	5.35985	-0.873288	-1.66446	0.326262	0.000140835	0.0016105	0.0455835
CG5326	trough	24	4	8	0.0391763	1.02099	2.12354	-2.39653	4.52008	-0.88609	-1.37235	0.326371	0.000140835	0.0016105	0.0455835
CG5910	trough	24	4	16	-0.028509	0.997717	1.62224	-2.81623	4.43847	-0.576033	-1.073	0.326371	0.000140835	0.0016105	0.0455835
AnnIX	trough	24	8	16	3.50877e-08	1	3.79374	-2.47585	6.26958	-1.5323	-1.37483	0.325728	0.000140835	0.0016105	0.0455835
CG12241	trough	24	8	16	-1.75439e-08	1	1.84134	-2.58317	4.42451	-0.712823	-1.30353	0.325728	0.000140835	0.0016105	0.0455835
Sod	trough	24	8	16	3.50877e-08	1	2.77365	-2.5399	5.31355	-1.09203	-0.789428	0.325728	0.000140835	0.0016105	0.0455835
Hsp83	trough	24	4	16	1.94776e-17	1	1.76322	-3.46504	5.22826	-0.508859	-1.7621	0.326371	0.000140835	0.0016105	0.0455835
CAH2	trough	24	0	8	3.50877e-08	1	1.93665	-3.30267	5.23932	-0.58639	-1.28633	0.32573	0.000140835	0.0016105	0.0455835
CRMP	trough	24	8	16	1.75439e-08	1	2.96981	-2.83065	5.80046	-1.04916	-1.09973	0.325728	0.000140835	0.0016105	0.0455835
CG1136	trough	24	4	8	-1.75439e-08	1	1.87248	-2.39643	4.26891	-0.781362	-0.918471	0.326371	0.000140835	0.0016105	0.0455835
CG15202	trough	24	16	16	-1.75439e-08	1	1.7288	-3.45449	5.18329	-0.50045	-1.79085	0.326262	0.000140835	0.0016105	0.0455835
GIIIspla2	trough	24	4	16	3.50877e-08	1	2.37907	-2.44168	4.82074	-0.974358	-1.22549	0.325086	0.000149027	0.0017305	0.0479191
santa-maria	trough	24	4	16	-5.26316e-08	1	1.49331	-2.46418	3.95749	-0.606008	-2.18952	0.325086	0.000149027	0.0017305	0.0479191
mbc	trough	24	16	8	-1.75439e-08	1	2.29235	-3.34039	5.63274	-0.686253	-1.52768	0.32498	0.000149027	0.0017305	0.0479191
CG7442	trough	24	8	16	-7.01754e-08	1	2.07746	-2.21339	4.29085	-0.938589	-1.04286	0.324445	0.000149027	0.0017305	0.0479191
CG5447	trough	24	12	16	-2.19123e-17	1	2.06998	-2.51988	4.58986	-0.821462	-1.19601	0.324767	0.000149027	0.0017305	0.0479191
kst	trough	24	0	8	-1.55821e-17	1	1.90218	-2.48368	4.38586	-0.765871	-0.99717	0.324443	0.000149027	0.0017305	0.0479191
Ent2	trough	24	20	8	-5.26316e-08	1	2.70806	-2.74276	5.45082	-0.987349	-1.39124	0.324767	0.000149027	0.0017305	0.0479191
Gpdh	trough	24	8	8	1.75439e-08	1	2.20983	-2.09752	4.30735	-1.05354	-1.17794	0.323163	0.000157658	0.0017805	0.0479191
CG8738	trough	24	12	8	-3.50877e-08	1	2.13429	-3.04149	5.17577	-0.701725	-1.11744	0.323486	0.000157658	0.0017805	0.0479191
Fdh	trough	24	12	8	0	1	1.7053	-3.14102	4.84632	-0.542913	-1.25585	0.323486	0.000157658	0.0017805	0.0479191
CG7560	trough	24	8	16	1.75439e-08	1	1.99135	-3.0058	4.99715	-0.662503	-1.41027	0.323163	0.000157658	0.0017805	0.0479191
Pgd	trough	24	4	16	3.50877e-08	1	2.10083	-2.24682	4.34765	-0.935022	-1.17581	0.323801	0.000157658	0.0017805	0.0479191
CG17325	trough	24	8	8	-3.50877e-08	1	1.71626	-2.27764	3.9939	-0.753525	-1.36658	0.323163	0.000157658	0.0017805	0.0479191
CG1552	trough	24	0	8	3.50877e-08	1	1.77669	-2.95508	4.73176	-0.601231	-1.64648	0.323155	0.000157658	0.0017805	0.0479191
mRpL23	trough	24	20	8	-1.16866e-17	1	1.76113	-1.67421	3.43534	-1.05192	-0.757106	0.323486	0.000157658	0.0017805	0.0479191
CG6459	trough	24	16	8	7.01754e-08	1	2.09149	-1.81654	3.90803	-1.15136	-1.15488	0.323698	0.000157658	0.0017805	0.0479191
cta	trough	24	12	16	-3.50877e-08	1	1.4811	-2.74649	4.22759	-0.539269	-1.61718	0.323486	0.000157658	0.0017805	0.0479191
CG8026	trough	24	12	8	-0.00898158	1.05811	2.77266	-2.67978	5.45244	-1.03466	-1.15076	0.322205	0.000166751	0.0018905	0.0500123
mbf1	trough	24	8	16	1.75439e-08	1	1.98954	-2.20638	4.19593	-0.901721	-1.26003	0.321881	0.000166751	0.0018905	0.0500123
CG4101	trough	24	4	16	3.50877e-08	1	2.00423	-2.43905	4.44328	-0.821728	-0.921338	0.322516	0.000166751	0.0018905	0.0500123
SPE	trough	24	16	8	3.50877e-08	1	2.02063	-2.70975	4.73038	-0.745689	-1.28288	0.322416	0.000166751	0.0018905	0.0500123
CG6805	trough	24	20	16	-5.26316e-08	1	1.98649	-2.10264	4.08914	-0.944762	-1.11328	0.32167	0.000166751	0.0018905	0.0500123
ns2	trough	24	20	8	0.0166506	0.99899	2.13866	-2.16059	4.29925	-0.989848	-1.53909	0.322205	0.000166751	0.0018905	0.0500123
CG2767	trough	24	4	8	-1.75439e-08	1	2.09248	-1.89094	3.98342	-1.10658	-0.903359	0.321231	0.000176327	0.0019805	0.0519504
CG10006	trough	24	0	16	-0.00116501	0.991228	2.05836	-2.4126	4.47096	-0.853168	-1.21296	0.32058	0.000176327	0.0019805	0.0519504
CG7470	trough	24	16	8	-7.79104e-18	1	3.96888	-1.83135	5.80023	-2.1672	-0.686958	0.321134	0.000176327	0.0019805	0.0519504
pkaap	trough	24	16	16	-1.75439e-08	1	1.89725	-2.31932	4.21657	-0.81802	-0.940488	0.319852	0.000186411	0.0020705	0.0535569
CG10741	trough	24	4	16	-0.00708294	0.955586	1.63366	-2.1135	3.74716	-0.772966	-1.29534	0.319946	0.000186411	0.0020705	0.0535569
Mgat1	trough	24	4	16	5.84328e-18	1	1.71126	-2.33179	4.04305	-0.733883	-0.890291	0.319946	0.000186411	0.0020705	0.0535569
stc	trough	24	8	16	3.50877e-08	1	2.89845	-3.7169	6.61535	-0.779803	-1.00174	0.319316	0.000186411	0.0020705	0.0535569
CG10992	trough	24	8	16	3.50877e-08	1	2.04628	-2.58026	4.62654	-0.793051	-1.27234	0.319316	0.000186411	0.0020705	0.0535569
Aats-asp	trough	24	12	8	3.50877e-08	1	1.89214	-2.49061	4.38275	-0.759711	-1.17225	0.318361	0.000197026	0.0021605	0.054819
l(2)not	trough	24	12	8	4.38246e-18	1	2.53119	-2.63712	5.16831	-0.959833	-1.01729	0.318361	0.000197026	0.0021605	0.054819
CG16712	trough	24	4	16	7.01754e-08	1	1.89272	-2.08149	3.97421	-0.909307	-1.40921	0.318661	0.000197026	0.0021605	0.054819
CG1628	trough	24	12	16	3.50877e-08	1	1.72537	-2.38427	4.10963	-0.723648	-1.18158	0.318361	0.000197026	0.0021605	0.054819
CG42240	trough	24	20	8	1.75439e-08	1	2.71121	-2.30833	5.01954	-1.17453	-1.04681	0.318361	0.000197026	0.0021605	0.054819
CG6983	trough	24	20	16	1.38778e-17	1	1.99833	-2.90462	4.90295	-0.687984	-1.48931	0.317825	0.000197026	0.0021605	0.054819
Oatp74D	trough	24	20	8	-1.75439e-08	1	2.57558	-2.27659	4.85217	-1.13133	-0.967119	0.318361	0.000197026	0.0021605	0.054819
CG17298	trough	24	4	16	-3.50877e-08	1	1.67508	-2.95115	4.62623	-0.567603	-1.32232	0.317376	0.000208197	0.0023205	0.0582439
CG5830	trough	24	8	16	5.26316e-08	1	1.54396	-2.09881	3.64277	-0.735637	-1.21413	0.316751	0.000208197	0.0023205	0.0582439
CG8578	trough	24	16	8	-0.038109	1.03247	1.63229	-3.15651	4.7888	-0.517118	-1.48485	0.317288	0.000208197	0.0023205	0.0582439
CG10257	trough	24	20	16	1.05263e-07	1	1.77191	-2.91966	4.69157	-0.606892	-0.807556	0.316543	0.000208197	0.0023205	0.0582439
Oatp58Dc	trough	24	4	8	0.0278394	0.993348	1.84266	-2.41467	4.25733	-0.763107	-1.3832	0.316091	0.000219952	0.0024505	0.0602086
mop	trough	24	4	16	7.01754e-08	1	1.54718	-3.40334	4.95052	-0.454606	-2.50009	0.316091	0.000219952	0.0024505	0.0602086
CG13012	trough	24	8	8	0.0058674	0.992161	1.7201	-3.01846	4.73856	-0.569861	-1.32002	0.315469	0.000219952	0.0024505	0.0602086
CG4629	trough	24	20	16	-3.50877e-08	1	2.06243	-2.06526	4.12769	-0.99863	-0.970771	0.315262	0.000219952	0.0024505	0.0602086
CG8034	trough	24	20	8	-0.0396989	1.0035	2.18453	-3.41576	5.60029	-0.639544	-1.04961	0.315799	0.000219952	0.0024505	0.0602086
qtc	trough	24	20	16	-8.77193e-08	1	2.27471	-2.06952	4.34424	-1.09915	-1.01848	0.315262	0.000219952	0.0024505	0.0602086
CAP	trough	24	20	16	0.0123994	0.995523	1.5041	-3.69229	5.19638	-0.407362	-2.7912	0.315262	0.000219952	0.0024505	0.0602086
CG9065	trough	24	16	16	5.26316e-08	1	3.54229	-2.11236	5.65464	-1.67693	-1.01506	0.316006	0.000219952	0.0024505	0.0602086
eya	trough	24	16	8	1.75439e-08	1	2.61477	-2.34035	4.95512	-1.11725	-1.07339	0.314724	0.000232317	0.0026405	0.063372
Ady43A	trough	24	0	16	7.79104e-18	1	2.18795	-2.68048	4.86842	-0.816252	-1.15693	0.314143	0.000232317	0.0026405	0.063372
PIP82	trough	24	8	16	1.75439e-08	1	1.88611	-2.34513	4.23124	-0.804269	-1.16355	0.314186	0.000232317	0.0026405	0.063372
CG17108	trough	24	0	8	-3.50877e-08	1	2.16788	-1.77784	3.94572	-1.21939	-1.15547	0.314143	0.000232317	0.0026405	0.063372
CG14107	trough	24	8	16	0.0311013	0.963645	1.74055	-2.20695	3.94749	-0.788668	-1.33439	0.314186	0.000232317	0.0026405	0.063372
CG10311	trough	24	4	16	1.16866e-17	1	1.77927	-2.58946	4.36873	-0.68712	-1.0019	0.314807	0.000232317	0.0026405	0.063372
CG13795	trough	24	4	16	1.94776e-17	1	1.57014	-2.87428	4.44441	-0.546272	-1.54631	0.314807	0.000232317	0.0026405	0.063372
CG34165	trough	24	20	16	0.00663246	0.987796	1.97799	-3.04863	5.02663	-0.648813	-1.35425	0.31398	0.000232317	0.0026405	0.063372
mRpL39	trough	24	16	16	-5.26316e-08	1	1.67722	-3.42064	5.09787	-0.490324	-1.36146	0.314724	0.000232317	0.0026405	0.063372
CG5828	trough	24	4	8	-3.50877e-08	1	2.35291	-2.47905	4.83195	-0.949118	-1.17431	0.313522	0.000245322	0.0027805	0.065883
CG3074	trough	24	4	16	5.26316e-08	1	1.7474	-2.21384	3.96124	-0.789307	-0.900827	0.313522	0.000245322	0.0027805	0.065883
CG18616	trough	24	8	16	-5.26316e-08	1	2.24084	-1.84824	4.08907	-1.21242	-1.11712	0.312904	0.000245322	0.0027805	0.065883
Nurf-38	trough	24	4	16	1.75439e-08	1	1.79131	-2.24569	4.037	-0.797665	-1.33759	0.313522	0.000245322	0.0027805	0.065883
l(1)G0334	trough	24	20	8	-1.94776e-17	1	2.23486	-2.93088	5.16575	-0.762522	-1.15459	0.313237	0.000245322	0.0027805	0.065883
CG17110	trough	24	12	16	1.75439e-08	1	2.02739	-2.32566	4.35306	-0.871748	-0.984504	0.311956	0.000258996	0.0028905	0.067123
CG4467	trough	24	8	16	-7.01754e-08	1	2.09678	-2.17124	4.26802	-0.965704	-1.2468	0.311621	0.000258996	0.0028905	0.067123
CG2889	trough	24	8	16	0.016518	0.998867	1.75756	-2.36027	4.11783	-0.744646	-1.09729	0.311621	0.000258996	0.0028905	0.067123
CG15539	trough	24	12	8	-7.01754e-08	1	1.80629	-2.40926	4.21556	-0.749728	-1.09185	0.311956	0.000258996	0.0028905	0.067123
CG9989	trough	24	8	16	0.0428968	1.13699	2.45928	-3.42469	5.88397	-0.718105	-2.37911	0.311621	0.000258996	0.0028905	0.067123
Pect	trough	24	8	16	-3.50877e-08	1	1.85617	-2.24862	4.10479	-0.825474	-1.00862	0.311621	0.000258996	0.0028905	0.067123
Proct	trough	24	0	16	-0.00619204	0.99449	1.594	-2.48673	4.08073	-0.641002	-0.908415	0.311568	0.000258996	0.0028905	0.067123
PGRP-SA	trough	24	16	8	-3.50877e-08	1	1.85901	-3.57999	5.43901	-0.519278	-1.17673	0.31216	0.000258996	0.0028905	0.067123
Aldh	trough	24	4	8	-7.01754e-08	1	2.26348	-2.42555	4.68903	-0.933182	-1.10191	0.310952	0.00027337	0.0030905	0.0703636
CG7261	trough	24	8	16	0.00681571	0.999839	1.99209	-2.41715	4.40925	-0.824149	-1.10008	0.310339	0.00027337	0.0030905	0.0703636
CG11791	trough	24	8	16	3.50877e-08	1	2.06052	-2.84662	4.90715	-0.723849	-1.2188	0.310339	0.00027337	0.0030905	0.0703636
CG9247	trough	24	0	8	-3.50877e-08	1	2.10346	-2.08182	4.18527	-1.0104	-1.01333	0.310281	0.00027337	0.0030905	0.0703636
Obp99d	trough	24	4	8	0.0306968	0.973219	1.63422	-2.74782	4.38204	-0.594735	-1.82476	0.310952	0.00027337	0.0030905	0.0703636
CG13689	trough	24	0	8	0.0274211	0.984146	1.80537	-2.26196	4.06733	-0.798146	-1.34614	0.310281	0.00027337	0.0030905	0.0703636
Vago	trough	24	20	8	1.75439e-08	1	2.17418	-2.41468	4.58887	-0.900402	-1.23616	0.310675	0.00027337	0.0030905	0.0703636
Gyc-89Db	trough	24	8	8	0.0289332	1.01456	1.64919	-2.21409	3.86329	-0.744861	-1.39884	0.310339	0.00027337	0.0030905	0.0703636
emp	trough	24	8	8	-1.55821e-17	1	1.88304	-3.35293	5.23597	-0.561609	-0.929059	0.309057	0.000288476	0.0032605	0.0731609
CG14711	trough	24	4	16	0.0160156	0.998409	1.57878	-2.67966	4.25844	-0.58917	-1.83356	0.309667	0.000288476	0.0032605	0.0731609
CG11913	trough	24	0	8	0.0416055	0.993887	2.98864	-3.11641	6.10505	-0.959003	-1.58288	0.308993	0.000288476	0.0032605	0.0731609
GstE6	trough	24	0	16	1.94776e-17	1	1.63697	-2.4189	4.05587	-0.67674	-1.04909	0.308993	0.000288476	0.0032605	0.0731609
ds	trough	24	4	16	1.75439e-08	1	1.98015	-2.26159	4.24174	-0.875559	-1.43843	0.309667	0.000288476	0.0032605	0.0731609
Ance-5	trough	24	16	16	5.26316e-08	1	2.28016	-2.92976	5.20992	-0.778277	-1.43162	0.309596	0.000288476	0.0032605	0.0731609
ple	trough	24	0	16	0.0105984	1.02132	1.69642	-2.53912	4.23555	-0.668115	-0.867283	0.307706	0.000304349	0.0034305	0.0758784
Tig	trough	24	12	8	3.50877e-08	1	1.97475	-2.08959	4.06434	-0.945045	-1.23459	0.308112	0.000304349	0.0034305	0.0758784
CG12171	trough	24	12	8	-0.0299605	1.06024	2.93767	-3.02968	5.96735	-0.969629	-0.873625	0.308112	0.000304349	0.0034305	0.0758784
CG14072	trough	24	16	16	0.0288408	0.985432	1.16726	-3.13554	4.30279	-0.372268	-4.91895	0.308314	0.000304349	0.0034305	0.0758784
CG12338	trough	24	12	16	3.50877e-08	1	2.05103	-2.29361	4.34464	-0.894234	-1.105	0.308112	0.000304349	0.0034305	0.0758784
DNaseII	trough	24	12	16	0.036786	1.00234	2.70247	-2.0913	4.79377	-1.29224	-0.956337	0.308112	0.000304349	0.0034305	0.0758784
alpha-Man-II	trough	24	20	8	7.79104e-18	1	1.64725	-2.67346	4.32071	-0.616147	-1.23643	0.306831	0.000321023	0.0036405	0.0793918
cbt	trough	24	12	8	-7.79104e-18	1	2.05144	-3.62159	5.67304	-0.566448	-1.12467	0.306831	0.000321023	0.0036405	0.0793918
CG1309	trough	24	20	16	3.50877e-08	1	1.95961	-2.22349	4.1831	-0.881319	-1.23753	0.307573	0.000321023	0.0036405	0.0793918
CG34325	trough	24	4	16	-4.8694e-18	1	1.91185	-2.23705	4.1489	-0.85463	-1.32618	0.307097	0.000321023	0.0036405	0.0793918
CG4567	trough	24	20	8	-0.029406	0.982044	1.87744	-2.49889	4.37632	-0.75131	-1.15763	0.306831	0.000321023	0.0036405	0.0793918
gw	trough	24	16	8	1.75439e-08	1	2.68526	-2.28416	4.96942	-1.1756	-0.93341	0.307032	0.000321023	0.0036405	0.0793918
CG9246	trough	24	16	8	-0.036739	0.94672	1.83712	-2.7921	4.62921	-0.65797	-1.18793	0.30575	0.000338535	0.0038305	0.0819991
gammaCop	trough	24	12	8	1.75439e-08	1	3.89717	-2.07539	5.97256	-1.8778	-0.814805	0.30555	0.000338535	0.0038305	0.0819991
CG30410	trough	24	8	16	-1.55821e-17	1	2.39989	-2.75227	5.15216	-0.871967	-1.66032	0.305209	0.000338535	0.0038305	0.0819991
Pfrx	trough	24	16	8	-2.33731e-17	1	3.5623	-2.24682	5.80912	-1.58549	-0.633174	0.30575	0.000338535	0.0038305	0.0819991
CG8036	trough	24	8	16	-7.01754e-08	1	2.26648	-2.16698	4.43346	-1.04592	-0.970514	0.305209	0.000338535	0.0038305	0.0819991
CG15309	trough	24	20	16	1.75439e-08	1	2.20031	-3.04018	5.24048	-0.723743	-1.28021	0.306291	0.000338535	0.0038305	0.0819991
CG12768	trough	24	20	16	-3.50877e-08	1	1.70718	-2.75658	4.46376	-0.619312	-1.20751	0.306291	0.000338535	0.0038305	0.0819991
CG14528	trough	24	20	16	-0.000283435	0.992492	1.9589	-2.55028	4.50917	-0.76811	-1.1036	0.306291	0.000338535	0.0038305	0.0819991
CG4061	trough	24	12	16	-1.75439e-08	1	2.19699	-2.57216	4.76915	-0.854144	-0.925014	0.304269	0.000356922	0.0039905	0.0836926
CG7077	trough	24	16	16	1.94776e-18	1	2.25519	-2.22786	4.48305	-1.01227	-0.926397	0.304468	0.000356922	0.0039905	0.0836926
CG14694	trough	24	8	8	-3.50877e-08	1	1.99678	-2.05503	4.05181	-0.971656	-0.914258	0.303927	0.000356922	0.0039905	0.0836926
CG18549	trough	24	20	16	3.50877e-08	1	2.12412	-2.70067	4.82479	-0.786515	-1.31449	0.305009	0.000356922	0.0039905	0.0836926
CG12868	trough	24	8	16	5.26316e-08	1	2.10714	-2.58341	4.69054	-0.815643	-1.42714	0.303927	0.000356922	0.0039905	0.0836926
CG16713	trough	24	8	16	1.75439e-08	1	1.71718	-1.81444	3.53162	-0.946397	-1.15876	0.303927	0.000356922	0.0039905	0.0836926
CG14454	trough	24	4	16	-1.75439e-08	1	1.6309	-2.11788	3.74878	-0.770061	-1.19147	0.304527	0.000356922	0.0039905	0.0836926
CG1927	trough	24	20	16	1.75439e-08	1	2.7016	-2.15101	4.8526	-1.25597	-1.48287	0.305009	0.000356922	0.0039905	0.0836926
CG11147	trough	24	20	8	-3.50877e-08	1	2.14395	-2.13224	4.2762	-1.00549	-1.0696	0.304269	0.000356922	0.0039905	0.0836926
CG17190	trough	24	0	16	0.0654714	1.06127	3.21525	-2.82092	6.03617	-1.13979	-2.2654	0.303843	0.000376223	0.0042105	0.0873233
ltd	trough	24	20	16	-3.50877e-08	1	2.43855	-2.51044	4.94899	-0.97136	-1.13225	0.303728	0.000376223	0.0042105	0.0873233
CG4980	trough	24	4	16	0.0254836	1.00112	1.50759	-2.73561	4.2432	-0.551098	-1.56714	0.303242	0.000376223	0.0042105	0.0873233
CG14105	trough	24	4	16	-3.31119e-17	1	1.72467	-3.07291	4.79758	-0.56125	-1.07781	0.303242	0.000376223	0.0042105	0.0873233
Mocs1	trough	24	20	16	-0.0214819	1.00414	1.99957	-2.38212	4.38169	-0.839404	-1.60301	0.303728	0.000376223	0.0042105	0.0873233
CG42327	trough	24	12	8	0.0655013	0.956778	1.52307	-2.67372	4.19679	-0.569643	-1.78597	0.301707	0.00039648	0.0043805	0.089651
Cyp301a1	trough	24	12	8	-1.75439e-08	1	2.1788	-3.26551	5.4443	-0.667216	-1.47434	0.301707	0.00039648	0.0043805	0.089651
CG18347	trough	24	20	16	-1.75439e-08	1	2.67848	-2.23799	4.91647	-1.19683	-1.5994	0.302446	0.00039648	0.0043805	0.089651
cal1	trough	24	16	16	1.75439e-08	1	2.52811	-2.5683	5.09641	-0.984349	-1.03982	0.301904	0.00039648	0.0043805	0.089651
sprt	trough	24	4	8	-1.75439e-08	1	2.54425	-2.46341	5.00765	-1.03282	-1.02861	0.301957	0.00039648	0.0043805	0.089651
CG14053	trough	24	0	8	0.0701466	1.0211	2.23812	-3.6344	5.87252	-0.615815	-2.44223	0.302556	0.00039648	0.0043805	0.089651
Tsf2	trough	24	8	16	-3.50877e-08	1	2.02099	-3.37112	5.39211	-0.5995	-1.7299	0.301362	0.000417735	0.0045805	0.0921244
h	trough	24	12	8	-1.75439e-08	1	2.91044	-1.79334	4.70378	-1.62292	-0.902392	0.300426	0.000417735	0.0045805	0.0921244
CG31221	trough	24	8	8	-1.75439e-08	1	1.92873	-2.55058	4.47931	-0.756194	-1.28064	0.301362	0.000417735	0.0045805	0.0921244
CG10984	trough	24	12	16	-0.00736078	1.01035	1.53446	-3.17018	4.70464	-0.484029	-3.47312	0.300426	0.000417735	0.0045805	0.0921244
SP1173	trough	24	4	16	0.00658654	0.992414	1.96687	-3.3609	5.32777	-0.585221	-2.11098	0.300672	0.000417735	0.0045805	0.0921244
CG1213	trough	24	4	8	3.50877e-08	1	2.31634	-3.10306	5.4194	-0.74647	-1.1066	0.300672	0.000417735	0.0045805	0.0921244
CG16885	trough	24	8	8	-1.75439e-08	1	1.9226	-1.93587	3.85847	-0.993143	-1.09141	0.301362	0.000417735	0.0045805	0.0921244
CG15784	trough	24	12	8	-3.50877e-08	1	2.60603	-2.07435	4.68038	-1.25631	-0.850391	0.300426	0.000417735	0.0045805	0.0921244
CG7900	trough	24	12	16	0.0418827	0.994922	1.70058	-2.96235	4.66293	-0.574066	-1.99803	0.299144	0.000440031	0.0047805	0.0947149
NAAT1	trough	24	0	16	2.04515e-17	1	1.60595	-2.59239	4.19834	-0.619484	-1.47717	0.299981	0.000440031	0.0047805	0.0947149
CG4725	trough	24	4	16	-1.94167e-17	1	1.58545	-2.38639	3.97184	-0.664372	-1.79575	0.299387	0.000440031	0.0047805	0.0947149
PHGPx	trough	24	8	8	-5.26316e-08	1	2.44628	-2.68135	5.12763	-0.912329	-0.889702	0.30008	0.000440031	0.0047805	0.0947149
alphaTub85E	trough	24	8	16	3.50877e-08	1	2.19028	-3.75004	5.94032	-0.584068	-1.20991	0.30008	0.000440031	0.0047805	0.0947149
Akap200	trough	24	16	8	1.75439e-08	1	2.36053	-2.47254	4.83307	-0.954696	-1.22299	0.299341	0.000440031	0.0047805	0.0947149
CG2608	trough	24	20	8	3.50877e-08	1	2.54474	-2.38561	4.93035	-1.0667	-0.919246	0.299144	0.000440031	0.0047805	0.0947149
CG12910	trough	24	12	8	1.55821e-17	1	2.04121	-2.11028	4.15148	-0.967269	-1.16216	0.297863	0.000463415	0.0050605	0.0985844
bin	trough	24	12	8	5.84328e-18	1	2.0123	-2.98102	4.99332	-0.675036	-1.2931	0.297863	0.000463415	0.0050605	0.0985844
CG8525	trough	24	12	16	-8.77193e-08	1	2.35752	-2.19848	4.55601	-1.07234	-0.709209	0.297863	0.000463415	0.0050605	0.0985844
CG31326	trough	24	4	16	-7.01754e-08	1	1.86764	-2.07023	3.93787	-0.902145	-0.877703	0.298103	0.000463415	0.0050605	0.0985844
sol	trough	24	8	16	-3.50877e-08	1	1.74649	-2.58255	4.32904	-0.676264	-1.08985	0.298798	0.000463415	0.0050605	0.0985844
CG14722	trough	24	20	8	3.50877e-08	1	1.80462	-3.48135	5.28597	-0.518367	-1.44724	0.297863	0.000463415	0.0050605	0.0985844
CG4716	trough	24	20	16	-1.75439e-08	1	2.26491	-2.10613	4.37104	-1.07539	-1.32732	0.298602	0.000463415	0.0050605	0.0985844
CG33275	trough	24	20	16	-0.0702523	0.951566	1.79114	-2.1704	3.96154	-0.825256	-1.02445	0.298602	0.000463415	0.0050605	0.0985844
Nup58	trough	24	12	8	5.26316e-08	1	1.81411	-2.35598	4.17009	-0.770002	-1.49758	0.296582	0.000487934	0.0053105	0.101752
CG4042	trough	24	20	8	-3.50877e-08	1	2.34018	-2.52522	4.8654	-0.926721	-1.1647	0.296582	0.000487934	0.0053105	0.101752
antdh	trough	24	12	8	-1.94776e-18	1	1.70675	-3.08536	4.79211	-0.553176	-1.57875	0.296582	0.000487934	0.0053105	0.101752
CG33110	trough	24	4	16	-1.75439e-08	1	1.53777	-2.18617	3.72394	-0.703409	-1.37011	0.296818	0.000487934	0.0053105	0.101752
uri	trough	24	8	8	-5.26316e-08	1	1.71085	-3.57764	5.2885	-0.478207	-1.35529	0.297515	0.000487934	0.0053105	0.101752
CG12163	trough	24	16	8	-1.75439e-08	1	2.07944	-2.20881	4.28826	-0.941431	-1.15152	0.296777	0.000487934	0.0053105	0.101752
CG8790	trough	24	4	8	-8.77193e-08	1	1.92865	-1.69196	3.6206	-1.13989	-0.932225	0.296818	0.000487934	0.0053105	0.101752
CG3376	trough	24	20	8	5.26316e-08	1	2.38771	-2.54958	4.93729	-0.936511	-1.01355	0.296582	0.000487934	0.0053105	0.101752
Hsf	trough	24	8	16	9.7388e-18	1	1.77828	-2.93012	4.7084	-0.606897	-1.29421	0.296233	0.000513638	0.0055605	0.104605
CG16718	trough	24	16	8	-1.75439e-08	1	2.03719	-2.50998	4.54717	-0.811633	-1.48736	0.295495	0.000513638	0.0055605	0.104605
CG1970	trough	24	20	8	-7.01754e-08	1	1.9425	-1.63083	3.57333	-1.19111	-1.03552	0.295301	0.000513638	0.0055605	0.104605
chic	trough	24	8	16	1.75439e-08	1	3.58671	-2.44674	6.03345	-1.46592	-1.0478	0.296233	0.000513638	0.0055605	0.104605
CG18173	trough	24	12	8	1.75439e-08	1	2.22388	-2.33503	4.55892	-0.9524	-1.10131	0.295301	0.000513638	0.0055605	0.104605
alphaCop	trough	24	12	8	-5.26316e-08	1	2.04416	-2.18136	4.22553	-0.937103	-1.55289	0.295301	0.000513638	0.0055605	0.104605
SMC1	trough	24	0	16	3.50877e-08	1	2.0833	-1.95791	4.04121	-1.06404	-1.2023	0.296118	0.000513638	0.0055605	0.104605
CG5261	trough	24	20	8	-1.75439e-08	1	3.18032	-2.22947	5.40979	-1.42649	-0.833536	0.295301	0.000513638	0.0055605	0.104605
CG5498	trough	24	20	8	-3.50877e-08	1	1.6445	-3.21014	4.85464	-0.512283	-1.84831	0.295301	0.000513638	0.0055605	0.104605
l(1)G0320	trough	24	4	16	-3.50877e-08	1	2.34362	-2.71998	5.06359	-0.861632	-1.19131	0.294248	0.000540576	0.0058505	0.106823
emc	trough	24	16	8	-1.75439e-08	1	3.31102	-1.70633	5.01735	-1.94043	-1.0896	0.294213	0.000540576	0.0058505	0.106823
kek5	trough	24	12	8	0.0822378	1.03262	2.97404	-2.99423	5.96827	-0.993258	-1.80657	0.29402	0.000540576	0.0058505	0.106823
CG12014	trough	24	20	8	-1.75439e-08	1	2.30864	-1.95824	4.26689	-1.17894	-1.30618	0.29402	0.000540576	0.0058505	0.106823
CG17107	trough	24	8	16	0.0144289	0.997053	2.03158	-2.30505	4.33663	-0.881358	-1.30331	0.29495	0.000540576	0.0058505	0.106823
CG5381	trough	24	20	8	0.00549995	0.992043	1.72692	-2.93237	4.65929	-0.588917	-1.40301	0.29402	0.000540576	0.0058505	0.106823
CG7028	trough	24	16	8	1.75439e-08	1	2.3563	-2.81781	5.1741	-0.836217	-1.23501	0.294213	0.000540576	0.0058505	0.106823
CG9497	trough	24	20	16	1.55821e-17	1	2.1069	-2.73501	4.84191	-0.770346	-1.26631	0.294757	0.000540576	0.0058505	0.106823
CG5895	trough	24	20	8	-0.0182172	0.948243	1.88861	-2.54647	4.43508	-0.741658	-0.911139	0.29402	0.000540576	0.0058505	0.106823
inx2	trough	24	0	8	0.0251223	0.951718	1.89836	-2.20476	4.10312	-0.861031	-1.18325	0.294831	0.000540576	0.0058505	0.106823
mRpL45	trough	24	20	8	0	1	2.34582	-2.68491	5.03073	-0.873704	-1.00358	0.29402	0.000540576	0.0058505	0.106823
CG4302	trough	24	4	16	1.94776e-18	1	2.24092	-2.35763	4.59855	-0.950497	-1.42759	0.294248	0.000540576	0.0058505	0.106823
CG31344	trough	24	20	16	-3.50877e-08	1	2.52329	-2.0082	4.53149	-1.25649	-1.13713	0.294757	0.000540576	0.0058505	0.106823
mRpL51	trough	24	20	16	1.75439e-08	1	1.8754	-2.39954	4.27494	-0.781567	-1.31321	0.294757	0.000540576	0.0058505	0.106823
CG15096	trough	24	20	16	-5.26316e-08	1	1.99601	-2.5703	4.56631	-0.776568	-1.4022	0.294757	0.000540576	0.0058505	0.106823
Hil	trough	24	16	16	-1.22807e-07	1	2.74597	-3.47012	6.21608	-0.791318	-1.5535	0.292931	0.000568802	0.0061305	0.110849
CG4774	trough	24	20	8	1.75439e-08	1	2.61712	-2.41916	5.03628	-1.08183	-1.47311	0.292739	0.000568802	0.0061305	0.110849
CG11050	trough	24	16	8	-3.50877e-08	1	3.47374	-2.13614	5.60987	-1.62618	-0.717848	0.292931	0.000568802	0.0061305	0.110849
CG18812	trough	24	20	16	3.50877e-08	1	1.62598	-3.30093	4.92691	-0.492582	-0.861522	0.293475	0.000568802	0.0061305	0.110849
CG9747	trough	24	12	8	-3.50877e-08	1	2.08427	-2.14625	4.23053	-0.971123	-0.947094	0.292739	0.000568802	0.0061305	0.110849
betaggt-I	trough	24	12	16	-1.75439e-08	1	2.31178	-2.07901	4.39079	-1.11196	-1.19289	0.291458	0.000598371	0.0065705	0.11632
Mlc-c	trough	24	8	16	3.50877e-08	1	2.10233	-1.99873	4.10106	-1.05183	-1.47616	0.292386	0.000598371	0.0065705	0.11632
CG1882	trough	24	16	8	-3.50877e-08	1	2.81411	-3.25174	6.06584	-0.865416	-1.04662	0.291649	0.000598371	0.0065705	0.11632
CG16717	trough	24	4	16	-0.00902495	0.993487	1.50057	-3.03939	4.53997	-0.493708	-1.63859	0.291678	0.000598371	0.0065705	0.11632
CG18259	trough	24	4	16	-0.0143829	0.997016	1.94117	-3.49932	5.4405	-0.554728	-2.14859	0.291678	0.000598371	0.0065705	0.11632
CG10924	trough	24	0	8	0.0422958	0.984483	1.85124	-2.96996	4.8212	-0.623321	-1.28208	0.292256	0.000598371	0.0065705	0.11632
brn	trough	24	12	8	0.138395	0.948685	1.89679	-2.26795	4.16474	-0.836346	-1.81085	0.291458	0.000598371	0.0065705	0.11632
Fmrf	trough	24	4	8	-0.0192006	1.00155	2.18085	-2.37927	4.56012	-0.916603	-0.925291	0.291678	0.000598371	0.0065705	0.11632
GstD10	trough	24	4	8	0.0401236	0.972083	1.55999	-2.60555	4.16554	-0.59872	-1.71157	0.291678	0.000598371	0.0065705	0.11632
CG42367	trough	24	20	16	-0.0136339	0.971731	1.72635	-1.99032	3.71667	-0.867373	-1.1524	0.292194	0.000598371	0.0065705	0.11632
CG4259	trough	24	16	16	1.07127e-17	1	1.65733	-2.81142	4.46876	-0.5895	-1.04671	0.291649	0.000598371	0.0065705	0.11632
CG31436	trough	24	8	16	-3.50877e-08	1	1.86216	-2.21154	4.07371	-0.842019	-1.25021	0.291103	0.00062934	0.0068905	0.12061
T-cp1	trough	24	8	16	5.26316e-08	1	1.51433	-2.18504	3.69938	-0.693045	-0.962524	0.291103	0.00062934	0.0068905	0.12061
alien	trough	24	20	8	-3.89552e-18	1	2.08905	-2.34901	4.43805	-0.889331	-1.64966	0.290177	0.00062934	0.0068905	0.12061
CG15067	trough	24	12	16	-7.79104e-18	1	2.01528	-2.28571	4.30099	-0.881689	-1.19918	0.290177	0.00062934	0.0068905	0.12061
glob1	trough	24	20	16	-1.75439e-08	1	2.14589	-2.5932	4.73909	-0.827507	-1.16128	0.290912	0.00062934	0.0068905	0.12061
Ac13E	trough	24	20	8	-7.01754e-08	1	2.14656	-2.21314	4.3597	-0.969914	-1.58144	0.290177	0.00062934	0.0068905	0.12061
CG5045	trough	24	20	16	-1.16866e-17	1	1.97751	-2.82145	4.79896	-0.700883	-1.3171	0.289631	0.000661768	0.0071205	0.12144
baf	trough	24	8	16	-1.94776e-18	1	2.3236	-2.89113	5.21473	-0.803699	-0.941759	0.289821	0.000661768	0.0071205	0.12144
smi35A	trough	24	8	16	-5.26316e-08	1	1.61412	-2.69671	4.31083	-0.598554	-1.22706	0.289821	0.000661768	0.0071205	0.12144
CG10863	trough	24	8	16	-3.50877e-08	1	1.98026	-2.91775	4.89801	-0.678694	-1.66633	0.289821	0.000661768	0.0071205	0.12144
Mgstl	trough	24	8	8	-1.75439e-08	1	3.62451	-2.2778	5.90231	-1.59124	-0.88504	0.289821	0.000661768	0.0071205	0.12144
CG31937	trough	24	0	16	5.26316e-08	1	2.18491	-2.5481	4.73301	-0.857463	-0.911388	0.289681	0.000661768	0.0071205	0.12144
Utx	trough	24	16	16	-7.01754e-08	1	1.78481	-2.54025	4.32506	-0.702613	-1.6583	0.289085	0.000661768	0.0071205	0.12144
BobA	trough	24	4	16	7.01754e-08	1	2.24598	-3.95032	6.19629	-0.568555	-1.73568	0.289108	0.000661768	0.0071205	0.12144
CG15661	trough	24	4	8	-0.0338427	0.991458	1.82543	-2.74795	4.57338	-0.664288	-0.920005	0.289108	0.000661768	0.0071205	0.12144
Klc	trough	24	20	8	1.75439e-08	1	1.49971	-2.30379	3.8035	-0.650977	-1.285	0.288895	0.000661768	0.0071205	0.12144
CG1314	trough	24	0	8	-0.112145	0.961917	1.42224	-3.00966	4.4319	-0.472558	-1.05779	0.289681	0.000661768	0.0071205	0.12144
CG7430	trough	24	20	8	1.55821e-17	1	2.11401	-2.144	4.258	-0.986012	-0.825728	0.288895	0.000661768	0.0071205	0.12144
path	trough	24	20	8	-5.26316e-08	1	2.204	-3.20333	5.40733	-0.688034	-1.33058	0.288895	0.000661768	0.0071205	0.12144
CG1908	trough	24	12	16	0.0364262	1.02799	2.07629	-2.33584	4.41213	-0.888885	-1.59181	0.288895	0.000661768	0.0071205	0.12144
Xbp1	trough	24	8	16	2.19123e-18	1	2.15142	-1.96569	4.1171	-1.09449	-0.947744	0.288538	0.000695715	0.0074005	0.123501
CG3746	trough	24	4	16	-0.0718451	1.02137	1.8109	-2.27246	4.08336	-0.79689	-0.770654	0.287823	0.000695715	0.0074005	0.123501
cyr	trough	24	16	8	5.26316e-08	1	1.89029	-2.18014	4.07044	-0.86705	-1.03946	0.287803	0.000695715	0.0074005	0.123501
RhoGDI	trough	24	4	16	3.50877e-08	1	2.12552	-2.36896	4.49447	-0.897238	-1.19196	0.287823	0.000695715	0.0074005	0.123501
CG13723	trough	24	0	8	-0.0832476	1.00497	1.96145	-2.39962	4.36107	-0.817403	-1.11569	0.288394	0.000695715	0.0074005	0.123501
Ugt86Da	trough	24	8	8	-0.000538009	0.984579	2.13437	-3.07663	5.211	-0.693736	-1.00478	0.288538	0.000695715	0.0074005	0.123501
swm	trough	24	0	16	-5.26316e-08	1	1.72883	-2.3548	4.08364	-0.734173	-1.17054	0.288394	0.000695715	0.0074005	0.123501
CG4666	trough	24	16	16	-0.00102498	0.991219	1.5908	-2.83589	4.42669	-0.560952	-3.01962	0.287803	0.000695715	0.0074005	0.123501
CG8552	trough	24	16	8	-0.000906213	0.991213	1.83276	-2.59113	4.42389	-0.707322	-1.09861	0.287803	0.000695715	0.0074005	0.123501
CG34133	trough	24	12	16	-7.01754e-08	1	1.68264	-4.22221	5.90486	-0.398522	-1.63558	0.287614	0.000695715	0.0074005	0.123501
cdi	trough	24	20	8	0.0101851	0.994115	1.68574	-2.32692	4.01266	-0.724453	-1.30352	0.287614	0.000695715	0.0074005	0.123501
CG5955	trough	24	20	16	7.01754e-08	1	2.07925	-2.80258	4.88184	-0.741906	-1.1215	0.288349	0.000695715	0.0074005	0.123501
CG6689	trough	24	16	16	-2.09384e-17	1	2.72126	-2.19295	4.91421	-1.24092	-1.79673	0.286521	0.000731246	0.0077705	0.125841
orb2	trough	24	8	16	-1.55821e-17	1	1.61027	-2.80801	4.41828	-0.573456	-1.59444	0.287256	0.000731246	0.0077705	0.125841
CG9759	trough	24	16	8	3.50877e-08	1	2.35052	-1.94747	4.29799	-1.20696	-1.08137	0.286521	0.000731246	0.0077705	0.125841
bin3	trough	24	4	8	-0.0124184	0.979764	2.00601	-3.0816	5.08761	-0.650965	-1.28446	0.286538	0.000731246	0.0077705	0.125841
CG8369	trough	24	4	16	3.50877e-08	1	2.30043	-2.56525	4.86568	-0.896766	-0.80178	0.286538	0.000731246	0.0077705	0.125841
CG10560	trough	24	0	16	5.26316e-08	1	2.13189	-3.14815	5.28003	-0.677187	-1.30719	0.287106	0.000731246	0.0077705	0.125841
CG7262	trough	24	16	8	-5.26316e-08	1	1.8394	-2.84677	4.68617	-0.646138	-1.40193	0.286521	0.000731246	0.0077705	0.125841
CG13917	trough	24	4	16	0.0231487	0.992487	1.78594	-2.3336	4.11955	-0.765317	-1.02284	0.286538	0.000731246	0.0077705	0.125841
Invadolysin	trough	24	20	16	-8.77193e-08	1	2.51471	-2.75137	5.26608	-0.913982	-1.60784	0.287068	0.000731246	0.0077705	0.125841
CG16813	trough	24	4	8	-5.26316e-08	1	2.03779	-2.13393	4.17171	-0.954946	-1.17247	0.286538	0.000731246	0.0077705	0.125841
CG8534	trough	24	0	8	0.0111655	0.967795	1.36235	-2.90859	4.27093	-0.468388	-1.35374	0.287106	0.000731246	0.0077705	0.125841
CG12512	trough	24	0	16	1.94776e-17	1	1.54993	-3.42349	4.97342	-0.452733	-0.943399	0.287106	0.000731246	0.0077705	0.125841
Rgk1	trough	24	8	8	-3.50877e-08	1	1.73859	-2.45044	4.18903	-0.709501	-1.54662	0.287256	0.000731246	0.0077705	0.125841
CG10194	trough	24	16	16	-0.0211274	1.0173	1.89747	-3.55794	5.45541	-0.533305	-1.53937	0.286521	0.000731246	0.0077705	0.125841
CG13018	trough	24	16	16	-0.0201502	0.987655	1.68869	-2.50896	4.19766	-0.673065	-0.840978	0.286521	0.000731246	0.0077705	0.125841
Rac1	trough	24	16	8	-5.26316e-08	1	3.089	-1.97662	5.06562	-1.56277	-1.15633	0.286521	0.000731246	0.0077705	0.125841
CG33307	trough	24	16	8	-3.50877e-08	1	2.08488	-2.38976	4.47463	-0.872423	-1.30976	0.286521	0.000731246	0.0077705	0.125841
CG33630	trough	24	16	8	-0.100017	1.04464	1.91985	-2.5593	4.47915	-0.750145	-0.886264	0.285239	0.000768424	0.0081105	0.129991
Syn2	trough	24	20	16	0.0212266	0.99803	2.30323	-2.87434	5.17758	-0.801309	-2.18508	0.285786	0.000768424	0.0081105	0.129991
CG7058	trough	24	4	8	-0.0357785	1.07192	1.73121	-2.70053	4.43174	-0.64106	-0.864943	0.285253	0.000768424	0.0081105	0.129991
CG17612	trough	24	8	16	0.0121735	0.993952	1.54579	-3.34911	4.8949	-0.461553	-1.11722	0.285974	0.000768424	0.0081105	0.129991
CG7927	trough	24	20	8	-3.50877e-08	1	1.65038	-2.36506	4.01544	-0.697819	-1.18994	0.286333	0.000768424	0.0081105	0.129991
Spn1	trough	24	8	16	1.75439e-08	1	3.22579	-1.99969	5.22548	-1.61314	-1.07405	0.285974	0.000768424	0.0081105	0.129991
kel	trough	24	16	8	3.50877e-08	1	2.00548	-1.6907	3.69618	-1.18619	-1.08471	0.283957	0.000807318	0.0085705	0.13504
CycG	trough	24	4	16	-1.75439e-08	1	3.25991	-2.15563	5.41554	-1.51227	-0.832097	0.283968	0.000807318	0.0085705	0.13504
CG9512	trough	24	4	16	1.75439e-08	1	2.26258	-3.17855	5.44113	-0.711827	-1.82011	0.283968	0.000807318	0.0085705	0.13504
CG3168	trough	24	12	16	-1.75439e-08	1	1.9326	-1.99938	3.93198	-0.966599	-0.986262	0.285052	0.000807318	0.0085705	0.13504
dgo	trough	24	16	8	-0.0207439	0.979237	1.56092	-3.29484	4.85577	-0.473747	-1.15569	0.283957	0.000807318	0.0085705	0.13504
CG9634	trough	24	16	16	1.75439e-08	1	1.71718	-3.50818	5.22537	-0.489479	-1.75433	0.283957	0.000807318	0.0085705	0.13504
CG3645	trough	24	4	16	-0.00117744	0.991228	1.61905	-2.3231	3.94215	-0.696934	-1.43698	0.283968	0.000807318	0.0085705	0.13504
CG7530	trough	24	16	8	3.50877e-08	1	2.30563	-1.94463	4.25026	-1.18564	-0.964966	0.283957	0.000807318	0.0085705	0.13504
CG42353	trough	24	8	16	4.8694e-17	1	1.93993	-2.22569	4.16562	-0.87161	-0.947144	0.284691	0.000807318	0.0085705	0.13504
CG10055	trough	24	0	16	-1.75439e-08	1	2.60322	-2.56288	5.1661	-1.01574	-1.15403	0.284531	0.000807318	0.0085705	0.13504
Eps-15	trough	24	12	8	0.015395	0.997862	1.75355	-3.14146	4.89501	-0.558198	-1.92345	0.283771	0.000847999	0.0089905	0.139069
key	trough	24	16	8	-3.50877e-08	1	2.01323	-2.86923	4.88246	-0.701664	-1.39909	0.282675	0.000847999	0.0089905	0.139069
CG3065	trough	24	8	16	7.01754e-08	1	2.15797	-2.17722	4.33519	-0.991159	-1.41653	0.283409	0.000847999	0.0089905	0.139069
Pdi	trough	24	4	16	-1.75439e-08	1	2.63587	-2.16441	4.80028	-1.21783	-0.994793	0.282683	0.000847999	0.0089905	0.139069
crb	trough	24	8	16	1.16866e-17	1	2.22729	-2.54914	4.77643	-0.873742	-1.47634	0.283409	0.000847999	0.0089905	0.139069
Rph	trough	24	4	8	-0.00909997	1.00765	1.64355	-3.20153	4.84507	-0.513363	-1.75057	0.282683	0.000847999	0.0089905	0.139069
CG1239	trough	24	12	16	-0.0874227	1.04149	1.77263	-2.66956	4.44219	-0.664016	-0.913271	0.283771	0.000847999	0.0089905	0.139069
att-ORFA	trough	24	12	16	1.85037e-17	1	1.95521	-3.77482	5.73004	-0.517961	-1.34276	0.283771	0.000847999	0.0089905	0.139069
MED22	trough	24	20	8	-1.75439e-08	1	1.58764	-2.30203	3.88967	-0.689668	-1.06503	0.283771	0.000847999	0.0089905	0.139069
fon	trough	24	0	16	1.05263e-07	1	1.8363	-1.83004	3.66634	-1.00342	-1.08592	0.283244	0.000847999	0.0089905	0.139069
Dsor1	trough	24	4	16	-5.26316e-08	1	1.47432	-3.24355	4.71787	-0.454539	-1.49179	0.282683	0.000847999	0.0089905	0.139069
Rgl	trough	24	8	8	-0.0470563	0.977598	1.30127	-2.57665	3.87792	-0.505022	-0.980894	0.282126	0.000890537	0.0095005	0.143153
Sulf1	trough	24	8	16	3.50877e-08	1	2.02698	-2.1096	4.13658	-0.960838	-1.56677	0.282126	0.000890537	0.0095005	0.143153
SelD	trough	24	4	16	-0.0139363	1.00151	1.88535	-2.89761	4.78296	-0.650657	-0.882973	0.281399	0.000890537	0.0095005	0.143153
CG2982	trough	24	8	16	0.0579917	1.01616	2.40286	-2.88836	5.29122	-0.831911	-1.37149	0.282126	0.000890537	0.0095005	0.143153
CG15155	trough	24	8	16	0.010522	0.987818	1.8776	-2.74157	4.61916	-0.684864	-1.31685	0.282126	0.000890537	0.0095005	0.143153
RpS23	trough	24	4	16	-1.05263e-07	1	2.12007	-2.31838	4.43845	-0.914459	-0.952046	0.281399	0.000890537	0.0095005	0.143153
Hop	trough	24	8	16	-5.26316e-08	1	2.53726	-1.96231	4.49957	-1.293	-1.45086	0.282126	0.000890537	0.0095005	0.143153
Hsc70-5	trough	24	16	8	-1.75439e-08	1	1.73964	-2.30108	4.04071	-0.75601	-1.18598	0.281393	0.000890537	0.0095005	0.143153
CG6199	trough	24	4	16	0.00498704	1.00035	1.54347	-2.39165	3.93512	-0.645356	-1.38835	0.281399	0.000890537	0.0095005	0.143153
CG9005	trough	24	16	16	-0.0258428	0.958526	1.7974	-1.747	3.54441	-1.02885	-1.02293	0.281393	0.000890537	0.0095005	0.143153
CG34331	trough	24	4	16	3.50877e-08	1	1.88029	-2.39377	4.27407	-0.785492	-1.84633	0.281399	0.000890537	0.0095005	0.143153
CG7889	trough	24	16	8	1.94776e-18	1	1.95449	-2.34185	4.29634	-0.834595	-1.30075	0.281393	0.000890537	0.0095005	0.143153
mRpS29	trough	24	20	8	-5.26316e-08	1	2.42679	-1.76345	4.19024	-1.37617	-0.823587	0.28249	0.000890537	0.0095005	0.143153
CG12765	trough	24	20	8	-1.05263e-07	1	2.2182	-3.30039	5.51859	-0.672104	-1.31648	0.281937	0.000890537	0.0095005	0.143153
Drs	trough	24	20	8	-1.94776e-18	1	2.05794	-1.96498	4.02292	-1.04731	-1.17203	0.28249	0.000890537	0.0095005	0.143153
sPLA2	trough	24	20	16	3.50877e-08	1	2.14236	-2.39341	4.53577	-0.895109	-1.31768	0.281941	0.000890537	0.0095005	0.143153
CG7033	trough	24	12	8	0.0264198	0.950697	2.07913	-2.26656	4.34569	-0.917305	-1.00235	0.281209	0.000935009	0.0100805	0.148763
Cyt-b5	trough	24	8	8	4.28507e-17	1	2.27111	-2.65008	4.92119	-0.856999	-1.01724	0.280844	0.000935009	0.0100805	0.148763
CG8258	trough	24	4	16	-1.75439e-08	1	2.04917	-3.39769	5.44686	-0.603109	-1.23229	0.280114	0.000935009	0.0100805	0.148763
Faf	trough	24	8	16	3.50877e-08	1	2.48997	-2.5545	5.04448	-0.974737	-0.918435	0.280844	0.000935009	0.0100805	0.148763
CG7016	trough	24	4	16	5.26316e-08	1	1.97209	-2.63845	4.61053	-0.747441	-1.12628	0.280114	0.000935009	0.0100805	0.148763
l(1)G0255	trough	24	20	8	-3.50877e-08	1	2.5829	-2.15297	4.73587	-1.1997	-0.916064	0.281209	0.000935009	0.0100805	0.148763
Ect3	trough	24	20	16	1.75439e-08	1	1.95127	-2.31499	4.26626	-0.842886	-1.10392	0.28066	0.000935009	0.0100805	0.148763
Prx5037	trough	24	0	16	-0.048697	0.977393	1.78136	-2.41902	4.20039	-0.736397	-0.98135	0.280669	0.000935009	0.0100805	0.148763
Cp1	trough	24	16	8	-2.92164e-17	1	2.04474	-2.14185	4.18659	-0.954663	-1.00293	0.280111	0.000935009	0.0100805	0.148763
Gp150	trough	24	20	8	-1.16866e-17	1	1.82885	-2.64594	4.47479	-0.691191	-0.887537	0.281209	0.000935009	0.0100805	0.148763
CG13631	trough	24	20	8	0.0606401	1.0319	2.41845	-3.38007	5.79852	-0.715502	-1.71938	0.281209	0.000935009	0.0100805	0.148763
Ate1	trough	24	0	16	0.0215831	1.00426	1.88282	-3.41913	5.30195	-0.550671	-1.45287	0.280669	0.000935009	0.0100805	0.148763
tok	trough	24	16	8	-3.50877e-08	1	2.54781	-2.37204	4.91985	-1.0741	-0.761706	0.280111	0.000935009	0.0100805	0.148763
NKAIN	trough	24	12	8	-7.01754e-08	1	2.01971	-2.65451	4.67422	-0.76086	-0.946666	0.279927	0.000981492	0.0105005	0.153261
CG11951	trough	24	0	16	0.006937	0.992548	1.81434	-2.69067	4.50501	-0.67431	-1.26604	0.279381	0.000981492	0.0105005	0.153261
CG6672	trough	24	16	8	-1.75439e-08	1	2.58419	-2.26278	4.84697	-1.14204	-0.900515	0.278829	0.000981492	0.0105005	0.153261
Listericin	trough	24	16	16	7.01754e-08	1	3.09716	-2.00473	5.10189	-1.54493	-0.808437	0.278829	0.000981492	0.0105005	0.153261
CG9921	trough	24	20	8	1.75439e-08	1	1.59032	-2.03283	3.62315	-0.782316	-1.32358	0.279927	0.000981492	0.0105005	0.153261
CG6429	trough	24	20	16	-1.75439e-08	1	2.24591	-2.4368	4.68271	-0.921662	-0.979305	0.279378	0.000981492	0.0105005	0.153261
CG17124	trough	24	20	8	-1.75439e-08	1	1.93366	-1.90291	3.83657	-1.01616	-1.13303	0.279927	0.000981492	0.0105005	0.153261
CG1801	trough	24	8	8	0.0363811	1.01432	2.39346	-2.84766	5.24113	-0.840501	-1.58555	0.278279	0.00103007	0.0110305	0.159745
MED15	trough	24	8	16	8.77193e-08	1	2.0375	-2.03005	4.06755	-1.00367	-1.16252	0.278279	0.00103007	0.0110305	0.159745
CG10527	trough	24	8	16	-1.36343e-17	1	3.93448	-2.06113	5.99561	-1.90889	-0.769482	0.278279	0.00103007	0.0110305	0.159745
Stat92E	trough	24	8	16	3.50877e-08	1	2.39193	-2.22702	4.61896	-1.07405	-0.963788	0.278279	0.00103007	0.0110305	0.159745
CG8043	trough	24	20	8	-3.50877e-08	1	2.12127	-3.36433	5.4856	-0.630517	-1.33853	0.278646	0.00103007	0.0110305	0.159745
CanB	trough	24	4	8	-3.50877e-08	1	2.0797	-2.31994	4.39964	-0.896442	-1.44767	0.277544	0.00108081	0.0113605	0.162502
CG14566	trough	24	12	8	1.75439e-08	1	2.11311	-2.94527	5.05838	-0.717459	-1.25621	0.277365	0.00108081	0.0113605	0.162502
Side	trough	24	8	8	0.0291884	1.0096	2.16228	-1.80996	3.97224	-1.19466	-1.29065	0.276997	0.00108081	0.0113605	0.162502
Cont	trough	24	8	16	1.75439e-08	1	2.36439	-2.19037	4.55477	-1.07945	-1.20257	0.276997	0.00108081	0.0113605	0.162502
sowah	trough	24	12	8	-1.75439e-08	1	2.3176	-2.98202	5.29962	-0.777191	-1.03351	0.277365	0.00108081	0.0113605	0.162502
CG4619	trough	24	16	16	0.00528937	0.987163	1.6367	-2.69692	4.33362	-0.606877	-1.38884	0.277547	0.00108081	0.0113605	0.162502
ptr	trough	24	4	8	0.0363005	0.971954	1.70636	-2.27311	3.97948	-0.750672	-1.26571	0.277544	0.00108081	0.0113605	0.162502
l(3)05822	trough	24	8	16	-5.26316e-08	1	2.3941	-2.15201	4.5461	-1.1125	-0.960543	0.276997	0.00108081	0.0113605	0.162502
SuUR	trough	24	16	16	0.0292935	1.05757	2.69798	-2.9091	5.60708	-0.92743	-0.99035	0.276265	0.00113382	0.0118605	0.165585
CG13877	trough	24	4	16	6.81716e-18	1	2.45569	-2.36183	4.81752	-1.03974	-0.830449	0.276259	0.00113382	0.0118605	0.165585
CG6607	trough	24	8	16	1.75439e-08	1	2.92644	-2.38811	5.31455	-1.22542	-1.14466	0.275714	0.00113382	0.0118605	0.165585
CG8112	trough	24	16	8	-1.75439e-08	1	1.82012	-2.14466	3.96478	-0.848672	-1.3752	0.276265	0.00113382	0.0118605	0.165585
CG8771	trough	24	4	16	1.75439e-08	1	1.99137	-2.6212	4.61256	-0.759716	-1.02104	0.276259	0.00113382	0.0118605	0.165585
RhoGAP16F	trough	24	4	16	0.00588153	1.02214	2.25569	-2.85525	5.11094	-0.790018	-1.02559	0.276259	0.00113382	0.0118605	0.165585
Dsk	trough	24	8	16	5.26316e-08	1	2.23211	-2.69483	4.92694	-0.828294	-0.960854	0.275714	0.00113382	0.0118605	0.165585
CG4049	trough	24	4	16	7.01754e-08	1	1.51251	-2.73464	4.24715	-0.553093	-1.79093	0.276259	0.00113382	0.0118605	0.165585
Fatp	trough	24	8	16	-3.50877e-08	1	2.38171	-2.21676	4.59847	-1.07441	-1.24259	0.275714	0.00113382	0.0118605	0.165585
Fbp1	trough	24	20	8	-0.0191525	1.02234	2.16045	-2.4234	4.58385	-0.891497	-1.31222	0.276084	0.00113382	0.0118605	0.165585
CG6206	trough	24	12	8	-5.26316e-08	1	1.94867	-2.68249	4.63115	-0.726441	-1.07287	0.276084	0.00113382	0.0118605	0.165585
Aats-asn	trough	24	20	8	-7.01754e-08	1	1.7973	-3.0601	4.85739	-0.587334	-1.36012	0.276084	0.00113382	0.0118605	0.165585
dy	trough	24	16	8	-0.00530389	0.988743	1.68553	-2.86858	4.55411	-0.587583	-1.00014	0.276265	0.00113382	0.0118605	0.165585
CG17486	trough	24	20	16	1.75439e-08	1	1.88482	-2.27099	4.15582	-0.829956	-1.06079	0.275534	0.00113382	0.0118605	0.165585
pgant6	trough	24	0	8	1.75439e-08	1	1.57233	-2.4203	3.99264	-0.649643	-2.55364	0.275519	0.00113382	0.0118605	0.165585
CG3165	trough	24	4	8	5.26316e-08	1	1.97328	-2.84672	4.81999	-0.693178	-1.59758	0.276259	0.00113382	0.0118605	0.165585
CG18507	trough	24	4	8	5.26316e-08	1	2.48711	-2.44156	4.92868	-1.01866	-1.06398	0.274974	0.00118917	0.0123805	0.169291
CG10362	trough	24	8	16	1.75439e-08	1	1.77098	-2.63292	4.4039	-0.672629	-1.11728	0.274432	0.00118917	0.0123805	0.169291
Oda	trough	24	8	8	-7.01754e-08	1	2.10099	-2.97447	5.07546	-0.706341	-1.2909	0.274432	0.00118917	0.0123805	0.169291
Cpr100A	trough	24	4	8	-0.103209	0.916679	2.28046	-2.24723	4.5277	-1.01479	-0.693708	0.274974	0.00118917	0.0123805	0.169291
cora	trough	24	8	16	3.89552e-18	1	1.81775	-2.53408	4.35184	-0.717322	-1.4432	0.274432	0.00118917	0.0123805	0.169291
CG3573	trough	24	8	16	-8.77193e-08	1	2.80217	-2.2357	5.03787	-1.25337	-0.838442	0.274432	0.00118917	0.0123805	0.169291
CG31025	trough	24	20	8	-0.0483191	0.960133	1.792	-2.03702	3.82902	-0.879715	-0.89123	0.274803	0.00118917	0.0123805	0.169291
l(1)G0156	trough	24	20	8	-7.01754e-08	1	2.60941	-1.5997	4.20911	-1.63119	-1.02961	0.274803	0.00118917	0.0123805	0.169291
CG13295	trough	24	20	16	-0.0366211	0.892902	1.38481	-3.38386	4.76867	-0.40924	-1.36023	0.274252	0.00118917	0.0123805	0.169291
Eip71CD	trough	24	12	16	1.75439e-08	1	1.56169	-2.87831	4.43999	-0.542571	-1.36149	0.274803	0.00118917	0.0123805	0.169291
Pcaf	trough	24	8	16	-1.75439e-08	1	2.95881	-3.03038	5.9892	-0.976383	-1.06031	0.274432	0.00118917	0.0123805	0.169291
CG8586	trough	24	16	8	5.26316e-08	1	1.97354	-1.93591	3.90945	-1.01944	-1.25023	0.274983	0.00118917	0.0123805	0.169291
CG14526	trough	24	16	16	3.50877e-08	1	2.1633	-2.78508	4.94838	-0.776747	-1.26774	0.274983	0.00118917	0.0123805	0.169291
CG14935	trough	24	16	16	-1.75439e-08	1	2.43364	-3.27289	5.70652	-0.743574	-1.1186	0.274983	0.00118917	0.0123805	0.169291
CG33558	trough	24	20	8	-8.77193e-08	1	1.63903	-2.78065	4.41967	-0.589442	-1.55871	0.273522	0.00124697	0.0131105	0.174158
CG12207	trough	24	16	8	1.75439e-08	1	2.07962	-2.28752	4.36714	-0.909116	-0.830216	0.273701	0.00124697	0.0131105	0.174158
Cys	trough	24	8	16	-3.50877e-08	1	1.70627	-3.04852	4.75479	-0.559705	-1.24258	0.27315	0.00124697	0.0131105	0.174158
Tom34	trough	24	8	16	0.0052104	0.984384	1.98207	-3.02537	5.00744	-0.65515	-1.0938	0.27315	0.00124697	0.0131105	0.174158
l(1)G0469	trough	24	12	8	0.0302627	1.02241	1.80919	-3.35823	5.16742	-0.538734	-1.77815	0.273522	0.00124697	0.0131105	0.174158
CG9135	trough	24	12	8	1.75439e-08	1	1.87273	-2.78998	4.66271	-0.671236	-1.70093	0.273522	0.00124697	0.0131105	0.174158
ric8a	trough	24	4	16	-0.0364359	1.02801	2.0987	-2.87925	4.97795	-0.728906	-0.991345	0.273689	0.00124697	0.0131105	0.174158
CdsA	trough	24	4	8	-1.16866e-17	1	1.83447	-2.69781	4.53228	-0.679983	-0.951183	0.273689	0.00124697	0.0131105	0.174158
CG6904	trough	24	8	8	-3.31119e-17	1	2.05987	-2.29412	4.35398	-0.897891	-1.3943	0.27315	0.00124697	0.0131105	0.174158
edl	trough	24	8	16	0.00392892	0.991625	1.62449	-3.71603	5.34052	-0.437158	-2.24102	0.27315	0.00124697	0.0131105	0.174158
poly	trough	24	20	8	-3.50877e-08	1	2.20932	-1.95647	4.16579	-1.12923	-1.10774	0.273522	0.00124697	0.0131105	0.174158
CG7523	trough	24	16	8	-3.50877e-08	1	1.90334	-2.29196	4.1953	-0.830445	-1.35282	0.273701	0.00124697	0.0131105	0.174158
CG31120	trough	24	16	8	0.00880681	0.98771	1.97303	-2.86951	4.84255	-0.687584	-1.26912	0.273701	0.00124697	0.0131105	0.174158
trn	trough	24	8	8	1.75439e-08	1	1.95573	-2.40975	4.36547	-0.81159	-1.08884	0.27315	0.00124697	0.0131105	0.174158
CG14062	trough	24	0	16	-1.55821e-17	1	2.59869	-2.21726	4.81595	-1.17203	-1.01395	0.272944	0.00124697	0.0131105	0.174158
Dek	trough	24	16	8	1.75439e-08	1	1.94987	-2.53522	4.48509	-0.769116	-1.28947	0.273701	0.00124697	0.0131105	0.174158
CG15027	trough	24	16	16	-0.0565079	1.07037	1.96807	-2.63228	4.60035	-0.747667	-0.815314	0.273701	0.00124697	0.0131105	0.174158
Aats-ile	trough	24	16	16	1.94776e-17	1	1.73724	-2.69411	4.43135	-0.644827	-1.07328	0.273701	0.00124697	0.0131105	0.174158
eas	trough	24	20	8	3.50877e-08	1	2.19855	-2.61807	4.81663	-0.839761	-1.48617	0.273522	0.00124697	0.0131105	0.174158
ry	trough	24	20	8	0.00318399	0.985824	2.82559	-2.61517	5.44076	-1.08046	-1.06268	0.273522	0.00124697	0.0131105	0.174158
U2af50	trough	24	20	8	-7.79104e-18	1	2.0182	-2.45846	4.47666	-0.820918	-1.47841	0.272241	0.00130729	0.0136205	0.177143
pgc	trough	24	0	16	0.016608	1.04393	2.07156	-2.87902	4.95058	-0.719538	-1.86992	0.271657	0.00130729	0.0136205	0.177143
CG7409	trough	24	0	8	-1.37256e-17	1	2.00076	-3.00603	5.00679	-0.665582	-1.65423	0.271657	0.00130729	0.0136205	0.177143
sec71	trough	24	12	8	-9.25186e-18	1	1.91493	-2.42331	4.33824	-0.790216	-1.58408	0.272241	0.00130729	0.0136205	0.177143
CG42390	trough	24	16	8	1.75439e-08	1	2.08458	-2.82001	4.90459	-0.73921	-1.26662	0.272419	0.00130729	0.0136205	0.177143
CG17217	trough	24	20	8	0.0868196	0.955743	1.69228	-2.73198	4.42426	-0.619435	-1.63783	0.272241	0.00130729	0.0136205	0.177143
CG1826	trough	24	8	16	0.0353954	0.97735	1.99028	-3.59147	5.58175	-0.55417	-1.20363	0.271867	0.00130729	0.0136205	0.177143
CG10587	trough	24	4	8	5.26316e-08	1	2.42	-2.24757	4.66757	-1.07672	-1.06243	0.272404	0.00130729	0.0136205	0.177143
Rhp	trough	24	0	16	0.0627306	0.970745	1.73829	-2.38899	4.12728	-0.727625	-2.14139	0.271657	0.00130729	0.0136205	0.177143
Gclc	trough	24	20	8	-0.00828195	0.980043	2.24454	-2.20645	4.45099	-1.01726	-1.15058	0.272241	0.00130729	0.0136205	0.177143
CG5840	trough	24	8	16	8.77193e-08	1	1.53029	-2.7851	4.31539	-0.549457	-1.53759	0.271867	0.00130729	0.0136205	0.177143
kek4	trough	24	20	16	1.75439e-08	1	2.02325	-2.75947	4.78272	-0.733204	-1.67039	0.271689	0.00130729	0.0136205	0.177143
Rab-RP3	trough	24	20	8	-3.50877e-08	1	1.51061	-2.96618	4.47679	-0.509277	-1.57968	0.272241	0.00130729	0.0136205	0.177143
CG9328	trough	24	20	16	8.77193e-08	1	2.87327	-2.29024	5.16351	-1.25457	-1.24374	0.271689	0.00130729	0.0136205	0.177143
Hr46	trough	24	8	8	0.049416	0.941114	1.8023	-1.5961	3.3984	-1.12919	-1.08911	0.271867	0.00130729	0.0136205	0.177143
Tina-1	trough	24	0	16	1.75439e-08	1	1.97854	-2.69164	4.67018	-0.735068	-0.945418	0.270369	0.00137025	0.0142605	0.183417
CG2082	trough	24	8	16	7.79104e-18	1	2.37905	-2.78976	5.16881	-0.852777	-1.08731	0.270585	0.00137025	0.0142605	0.183417
CG9740	trough	24	16	8	-0.0413971	0.979062	1.68384	-3.13798	4.82182	-0.536599	-2.55484	0.271137	0.00137025	0.0142605	0.183417
CG7120	trough	24	20	16	0.0177363	1.00035	1.63781	-3.88621	5.52402	-0.421442	-1.19989	0.270408	0.00137025	0.0142605	0.183417
Aly	trough	24	8	16	-8.77193e-08	1	3.76213	-1.78393	5.54606	-2.10891	-0.668158	0.270585	0.00137025	0.0142605	0.183417
CG9249	trough	24	20	8	0.00796639	0.99298	1.79128	-2.35346	4.14474	-0.761128	-0.865961	0.27096	0.00137025	0.0142605	0.183417
CG14043	trough	24	0	8	-3.50877e-08	1	2.02172	-2.82433	4.84605	-0.715822	-0.964271	0.270369	0.00137025	0.0142605	0.183417
drk	trough	24	20	8	2.21558e-17	1	1.81756	-1.98109	3.79865	-0.917452	-1.38004	0.27096	0.00137025	0.0142605	0.183417
CG9062	trough	24	20	8	-0.0132625	1.05575	1.83977	-2.17716	4.01692	-0.845031	-1.75046	0.269678	0.00143593	0.0149205	0.189034
Cyp6a2	trough	24	4	16	-3.50877e-08	1	1.81438	-2.51607	4.33046	-0.721117	-1.6259	0.269834	0.00143593	0.0149205	0.189034
CG3918	trough	24	12	8	3.50877e-08	1	1.60619	-2.84646	4.45264	-0.564276	-1.51439	0.269678	0.00143593	0.0149205	0.189034
CG16710	trough	24	4	16	-0.0106003	1.0061	1.75124	-2.84932	4.60056	-0.614618	-1.28043	0.269834	0.00143593	0.0149205	0.189034
CG1444	trough	24	4	16	-7.01754e-08	1	1.88112	-2.30391	4.18503	-0.816488	-1.50447	0.269834	0.00143593	0.0149205	0.189034
RpS17	trough	24	4	16	-5.84328e-18	1	1.63371	-3.63992	5.27363	-0.448832	-2.00842	0.269834	0.00143593	0.0149205	0.189034
Gli	trough	24	8	16	7.01754e-08	1	2.2693	-1.97952	4.24882	-1.14639	-1.12479	0.269302	0.00143593	0.0149205	0.189034
CG7365	trough	24	16	8	1.75439e-08	1	2.37329	-3.23408	5.60736	-0.733838	-1.12952	0.269855	0.00143593	0.0149205	0.189034
CG14000	trough	24	4	8	0.0203663	0.964757	2.07734	-1.80472	3.88206	-1.15106	-1.15991	0.269834	0.00143593	0.0149205	0.189034
cpa	trough	24	8	8	-2.14254e-17	1	2.38921	-2.5619	4.95111	-0.932594	-1.17751	0.269302	0.00143593	0.0149205	0.189034
CG9243	trough	24	20	8	0.0283805	1.01369	2.19785	-3.86501	6.06286	-0.568653	-1.40798	0.269678	0.00143593	0.0149205	0.189034
CG3457	trough	24	0	16	5.84328e-18	1	1.55019	-2.53967	4.08986	-0.610388	-1.51486	0.267794	0.00150445	0.0154205	0.191973
CG8950	trough	24	0	16	-0.0142121	0.996879	1.48683	-2.87134	4.35817	-0.51782	-2.23858	0.267794	0.00150445	0.0154205	0.191973
CG14329	trough	24	0	16	3.50877e-08	1	1.8708	-2.51768	4.38848	-0.743063	-1.32897	0.267794	0.00150445	0.0154205	0.191973
CG13607	trough	24	12	8	-0.0281079	1.02516	2.04233	-2.88362	4.92594	-0.708252	-1.09202	0.268397	0.00150445	0.0154205	0.191973
yrt	trough	24	8	16	-3.50877e-08	1	1.75575	-2.50873	4.26449	-0.699858	-1.32323	0.26802	0.00150445	0.0154205	0.191973
Jafrac1	trough	24	8	8	-1.75439e-08	1	2.24514	-2.20297	4.44811	-1.01914	-1.22905	0.26802	0.00150445	0.0154205	0.191973
CG13933	trough	24	0	16	-2.33731e-17	1	1.41658	-3.48094	4.89752	-0.406952	-5.19082	0.267794	0.00150445	0.0154205	0.191973
dock	trough	24	20	8	1.75439e-08	1	2.13477	-2.61486	4.74962	-0.816398	-1.00358	0.268397	0.00150445	0.0154205	0.191973
beta'Cop	trough	24	12	8	3.89552e-18	1	1.68762	-2.59991	4.28752	-0.649106	-0.995587	0.268397	0.00150445	0.0154205	0.191973
CG8147	trough	24	8	8	-3.50877e-08	1	2.37697	-2.98829	5.36526	-0.795428	-0.80943	0.268745	0.00150445	0.0154205	0.191973
CG11660	trough	24	16	16	-1.55821e-17	1	2.01591	-2.06243	4.07834	-0.977445	-1.1225	0.268573	0.00150445	0.0154205	0.191973
CG3714	trough	24	8	8	0.0239665	1.00728	1.78377	-2.1836	3.96737	-0.816897	-1.1253	0.26802	0.00150445	0.0154205	0.191973
Ir60a	trough	24	4	8	0.0531579	0.996428	2.21151	-3.3731	5.58461	-0.655633	-1.37224	0.268549	0.00150445	0.0154205	0.191973
Sply	trough	24	8	16	-3.50877e-08	1	2.13524	-3.07912	5.21436	-0.693457	-1.16729	0.266738	0.0015759	0.0161105	0.196362
kek2	trough	24	8	16	0.0075763	0.992809	2.04418	-2.05629	4.10048	-0.994109	-1.26466	0.266738	0.0015759	0.0161105	0.196362
gl	trough	24	12	16	3.50877e-08	1	2.38321	-2.86156	5.24478	-0.832837	-0.972708	0.267116	0.0015759	0.0161105	0.196362
CG17896	trough	24	4	8	1.75439e-08	1	2.6762	-2.28468	4.96088	-1.17137	-1.2837	0.267264	0.0015759	0.0161105	0.196362
DAAM	trough	24	4	16	-0.0169909	1.02003	1.72559	-2.73394	4.45953	-0.631173	-1.3156	0.267264	0.0015759	0.0161105	0.196362
CG13919	trough	24	12	8	3.50877e-08	1	1.99683	-2.48803	4.48486	-0.802576	-1.46606	0.267116	0.0015759	0.0161105	0.196362
CG33235	trough	24	12	8	0.0336891	0.973911	1.85969	-2.4742	4.33389	-0.751631	-2.21167	0.267116	0.0015759	0.0161105	0.196362
CG30069	trough	24	8	8	1.55821e-17	1	2.49366	-2.18481	4.67847	-1.14136	-1.15814	0.266738	0.0015759	0.0161105	0.196362
CG42497	trough	24	20	16	3.50877e-08	1	2.33698	-2.10729	4.44427	-1.109	-0.91836	0.266563	0.0015759	0.0161105	0.196362
CG11294	trough	24	4	16	0.0233205	1.02974	1.90939	-2.86626	4.77565	-0.666162	-1.57725	0.267264	0.0015759	0.0161105	0.196362
CG11284	trough	24	8	16	-1.64342e-17	1	3.23917	-2.4901	5.72927	-1.30082	-1.51972	0.266738	0.0015759	0.0161105	0.196362
CG5288	trough	24	8	8	7.01754e-08	1	1.80085	-2.09667	3.89751	-0.858908	-1.044	0.266738	0.0015759	0.0161105	0.196362
Cyp12d1-d	trough	24	12	8	0.052754	0.974672	1.71375	-2.96521	4.67896	-0.57795	-1.51449	0.267116	0.0015759	0.0161105	0.196362
CG11866	trough	24	20	8	3.50877e-08	1	2.7283	-2.78603	5.51432	-0.979277	-0.972927	0.267116	0.0015759	0.0161105	0.196362
l(2)37Cc	trough	24	12	16	3.50877e-08	1	2.0092	-2.15462	4.16382	-0.932507	-0.98009	0.267116	0.0015759	0.0161105	0.196362
fok	trough	24	16	8	3.50877e-08	1	2.08216	-2.42247	4.50463	-0.859521	-1.00125	0.267291	0.0015759	0.0161105	0.196362
Spn77Bb	trough	24	20	8	0.0163691	0.976313	1.62152	-2.79991	4.42144	-0.579133	-1.39919	0.265835	0.00165041	0.0167205	0.199106
Obp19c	trough	24	16	8	0.0382304	0.997114	2.00674	-3.05493	5.06167	-0.656886	-2.21128	0.266009	0.00165041	0.0167205	0.199106
CG7945	trough	24	20	8	7.79104e-18	1	2.03956	-2.0636	4.10316	-0.988349	-1.26768	0.265835	0.00165041	0.0167205	0.199106
CG3618	trough	24	20	16	-0.0211253	1.0373	1.9607	-2.76981	4.73051	-0.707881	-1.06098	0.265281	0.00165041	0.0167205	0.199106
CG15057	trough	24	12	8	1.75439e-08	1	1.61716	-3.18077	4.79793	-0.508419	-1.13196	0.265835	0.00165041	0.0167205	0.199106
l(2)k16918	trough	24	8	16	-0.0024145	0.991354	2.74082	-2.37593	5.11675	-1.15358	-1.192	0.265455	0.00165041	0.0167205	0.199106
PyK	trough	24	4	16	7.01754e-08	1	3.34459	-2.08162	5.42621	-1.60673	-0.943196	0.265979	0.00165041	0.0167205	0.199106
TwdlM	trough	24	20	16	0.000985969	0.989684	1.76113	-3.28008	5.04121	-0.536916	-3.00262	0.265281	0.00165041	0.0167205	0.199106
CG42369	trough	24	12	16	-2.33731e-17	1	1.84821	-2.27463	4.12284	-0.81253	-1.16208	0.265835	0.00165041	0.0167205	0.199106
CG9657	trough	24	0	16	-3.50877e-08	1	2.28977	-2.3416	4.63137	-0.977866	-1.02926	0.265219	0.00165041	0.0167205	0.199106
Ser7	trough	24	8	16	-3.50877e-08	1	1.4523	-3.07232	4.52462	-0.472704	-1.46747	0.265455	0.00165041	0.0167205	0.199106
CG12107	trough	24	20	16	-0.00555584	0.986515	2.30596	-2.18835	4.49431	-1.05375	-0.777805	0.265281	0.00165041	0.0167205	0.199106
CG10462	trough	24	0	16	-0.0157725	1.02922	1.86885	-2.619	4.48785	-0.713574	-1.16388	0.265219	0.00165041	0.0167205	0.199106
CG9286	trough	24	20	8	-0.023583	1.00678	1.55855	-2.60932	4.16788	-0.597301	-1.20757	0.265835	0.00165041	0.0167205	0.199106
Obp18a	trough	24	20	16	-3.50877e-08	1	2.14445	-2.2234	4.36785	-0.964493	-0.9415	0.265281	0.00165041	0.0167205	0.199106
fbl6	trough	24	16	8	2.92164e-17	1	2.50393	-1.95437	4.4583	-1.2812	-0.933461	0.266009	0.00165041	0.0167205	0.199106
CG34261	trough	24	20	8	-0.184971	1.00153	1.45876	-2.59711	4.05587	-0.561685	-0.800076	0.265835	0.00165041	0.0167205	0.199106
Indy	trough	24	20	16	-3.50877e-08	1	1.80873	-2.5863	4.39504	-0.699352	-1.25172	0.265281	0.00165041	0.0167205	0.199106
Rpt3	trough	24	8	16	-3.50877e-08	1	2.34909	-2.71467	5.06376	-0.86533	-1.44757	0.264173	0.00172808	0.0172805	0.201902
CG12699	trough	24	16	8	0.0888815	0.994203	2.32469	-2.47545	4.80014	-0.939101	-1.82407	0.264727	0.00172808	0.0172805	0.201902
Rab1	trough	24	8	16	3.50877e-08	1	1.70058	-3.33242	5.033	-0.510312	-1.11071	0.264173	0.00172808	0.0172805	0.201902
CG4662	trough	24	4	16	0.0451452	0.990779	1.9938	-3.24354	5.23734	-0.6147	-2.03042	0.264694	0.00172808	0.0172805	0.201902
Dak1	trough	24	8	16	-7.01754e-08	1	2.42016	-2.70669	5.12685	-0.89414	-1.47607	0.264173	0.00172808	0.0172805	0.201902
CycH	trough	24	4	16	-3.50877e-08	1	1.84283	-2.36819	4.21103	-0.77816	-1.2656	0.264694	0.00172808	0.0172805	0.201902
Uba1	trough	24	8	16	-5.26316e-08	1	1.59962	-3.11455	4.71417	-0.513597	-1.46321	0.264173	0.00172808	0.0172805	0.201902
Jra	trough	24	8	8	1.75439e-08	1	1.88111	-3.57782	5.45893	-0.525771	-1.20164	0.264173	0.00172808	0.0172805	0.201902
CG17593	trough	24	12	16	3.50877e-08	1	2.30349	-2.14522	4.44871	-1.07378	-1.05448	0.264554	0.00172808	0.0172805	0.201902
CG31999	trough	24	8	8	1.33908e-17	1	1.69771	-3.48029	5.178	-0.487807	-1.50223	0.264173	0.00172808	0.0172805	0.201902
CG42326	trough	24	4	16	-1.16866e-17	1	1.51592	-3.24534	4.76127	-0.467107	-1.50359	0.264694	0.00172808	0.0172805	0.201902
lox2	trough	24	20	8	0.0199521	0.984394	2.12904	-2.25771	4.38675	-0.943009	-1.46732	0.264554	0.00172808	0.0172805	0.201902
CG9897	trough	24	16	16	0.036579	1.02615	2.53353	-2.2519	4.78543	-1.12507	-1.94601	0.264727	0.00172808	0.0172805	0.201902
CG2316	trough	24	20	8	-1.75439e-08	1	1.71383	-2.97112	4.68495	-0.576831	-1.27372	0.264554	0.00172808	0.0172805	0.201902
CG11877	trough	24	0	8	-0.0230376	0.984762	1.9729	-2.75375	4.72666	-0.716443	-1.36048	0.263932	0.00172808	0.0172805	0.201902
Klp98A	trough	24	0	8	-0.00278898	0.96502	1.75219	-2.46029	4.21247	-0.712189	-1.42526	0.262644	0.00180902	0.0180405	0.206888
CG3609	trough	24	4	16	0	1	2.43045	-2.8807	5.31116	-0.843702	-1.73245	0.26341	0.00180902	0.0180405	0.206888
usp	trough	24	8	16	0.00805132	1.02796	1.93095	-3.26172	5.19267	-0.592005	-1.78998	0.262891	0.00180902	0.0180405	0.206888
Crc	trough	24	8	16	-3.50877e-08	1	1.72611	-2.57226	4.29837	-0.67105	-1.34858	0.262891	0.00180902	0.0180405	0.206888
nAcRbeta-64B	trough	24	4	8	3.50877e-08	1	2.06057	-1.83183	3.8924	-1.12487	-1.05299	0.26341	0.00180902	0.0180405	0.206888
GalNAc-T2	trough	24	16	8	-0.0761047	1.04363	1.9822	-2.68151	4.6637	-0.73921	-0.971993	0.263445	0.00180902	0.0180405	0.206888
CG10014	trough	24	12	16	0.0854158	1.05329	2.48952	-1.99921	4.48874	-1.24525	-1.38093	0.263273	0.00180902	0.0180405	0.206888
CG7757	trough	24	12	8	5.84328e-18	1	1.7981	-2.07876	3.87686	-0.864989	-1.30567	0.263273	0.00180902	0.0180405	0.206888
CG15356	trough	24	4	16	0.00902065	1.06313	2.55528	-3.71525	6.27053	-0.687782	-1.65195	0.26341	0.00180902	0.0180405	0.206888
Krn	trough	24	4	16	-0.00561349	0.992079	2.36587	-3.03462	5.40049	-0.779626	-1.39943	0.26341	0.00180902	0.0180405	0.206888
Gdh	trough	24	4	8	-1.31474e-17	1	2.82035	-2.16038	4.98073	-1.30549	-1.76195	0.26341	0.00180902	0.0180405	0.206888
Fs	trough	24	8	16	-0.00245551	0.966342	1.95913	-2.52428	4.48341	-0.776113	-2.14973	0.262891	0.00180902	0.0180405	0.206888
Cda4	trough	24	4	16	-2.14558e-17	1	2.1284	-1.99198	4.12037	-1.06849	-1.22401	0.26341	0.00180902	0.0180405	0.206888
epsilonCOP	trough	24	0	16	-0.0166668	1.02547	1.78901	-2.78147	4.57048	-0.643189	-1.06904	0.262644	0.00180902	0.0180405	0.206888
CG31915	trough	24	16	8	-0.00473336	0.973778	1.96741	-3.40115	5.36855	-0.578454	-1.83529	0.263445	0.00180902	0.0180405	0.206888
loj	trough	24	8	8	3.50877e-08	1	2.6796	-1.69485	4.37445	-1.58103	-0.844034	0.261608	0.00189337	0.0186505	0.207992
CG5172	trough	24	8	16	-1.75439e-08	1	2.06713	-2.97879	5.04592	-0.693949	-1.58751	0.261608	0.00189337	0.0186505	0.207992
repo	trough	24	8	16	-3.50877e-08	1	2.60968	-2.80909	5.41877	-0.929014	-0.962415	0.261608	0.00189337	0.0186505	0.207992
CG9172	trough	24	20	8	3.50877e-08	1	2.13815	-2.06205	4.20021	-1.03691	-1.31617	0.261992	0.00189337	0.0186505	0.207992
boss	trough	24	4	8	1.05263e-07	1	1.99076	-2.85736	4.84812	-0.696715	-1.08773	0.262125	0.00189337	0.0186505	0.207992
CG13840	trough	24	4	16	-1.75439e-08	1	2.67202	-3.49877	6.17079	-0.763702	-0.820323	0.262125	0.00189337	0.0186505	0.207992
Cpr47Ef	trough	24	8	16	0.0111541	1.01307	2.05303	-2.29419	4.34721	-0.894883	-1.15896	0.261608	0.00189337	0.0186505	0.207992
Adf1	trough	24	8	16	-2.33731e-17	1	2.15166	-2.54005	4.69171	-0.847093	-1.19458	0.261608	0.00189337	0.0186505	0.207992
Tm1	trough	24	0	16	-5.26316e-08	1	2.16659	-2.68889	4.85548	-0.805758	-1.12383	0.261357	0.00189337	0.0186505	0.207992
CG5167	trough	24	4	16	1.75439e-08	1	1.69439	-3.06917	4.76356	-0.552068	-1.09196	0.262125	0.00189337	0.0186505	0.207992
egh	trough	24	20	8	-1.75439e-08	1	1.88949	-2.45209	4.34158	-0.770561	-1.0682	0.261992	0.00189337	0.0186505	0.207992
Ppn	trough	24	16	8	1.75439e-08	1	1.7243	-2.75222	4.47652	-0.626512	-1.23005	0.262163	0.00189337	0.0186505	0.207992
CG42376	trough	24	20	16	-0.031526	0.983585	1.94258	-1.94053	3.88311	-1.00105	-1.16858	0.261437	0.00189337	0.0186505	0.207992
wee	trough	24	16	8	1.75439e-08	1	2.30075	-2.09255	4.3933	-1.09949	-1.11797	0.262163	0.00189337	0.0186505	0.207992
flw	trough	24	4	8	7.01754e-08	1	2.23332	-2.38321	4.61653	-0.937105	-1.07611	0.262125	0.00189337	0.0186505	0.207992
Smg6	trough	24	4	16	1.75439e-08	1	1.95642	-2.13254	4.08896	-0.917415	-0.93013	0.262125	0.00189337	0.0186505	0.207992
CG14752	trough	24	4	16	3.50877e-08	1	2.29768	-2.80534	5.10302	-0.819041	-0.941	0.262125	0.00189337	0.0186505	0.207992
CG14606	trough	24	4	8	-0.0466579	1.02894	2.54102	-2.66865	5.20967	-0.952176	-1.28966	0.262125	0.00189337	0.0186505	0.207992
CG10479	trough	24	20	8	-1.75439e-08	1	2.58186	-2.79286	5.37472	-0.924449	-1.14761	0.261992	0.00189337	0.0186505	0.207992
Cortactin	trough	24	12	8	5.26316e-08	1	1.41018	-4.05072	5.4609	-0.34813	-1.34569	0.261992	0.00189337	0.0186505	0.207992
CG9536	trough	24	12	8	-5.26316e-08	1	3.61864	-1.70902	5.32766	-2.11738	-0.928096	0.261992	0.00189337	0.0186505	0.207992
CG14997	trough	24	0	8	-1.85037e-17	1	2.39638	-2.96436	5.36074	-0.808398	-1.25333	0.261357	0.00189337	0.0186505	0.207992
CG11652	trough	24	0	8	-3.50877e-08	1	1.6355	-2.97519	4.61069	-0.549711	-1.38366	0.261357	0.00189337	0.0186505	0.207992
CG6859	trough	24	4	16	0.0227653	0.995288	1.71138	-3.48745	5.19883	-0.490726	-2.01082	0.26084	0.00198123	0.0195505	0.212929
sr	trough	24	4	16	0.0181413	0.983087	2.05574	-1.91822	3.97395	-1.07169	-1.26066	0.26084	0.00198123	0.0195505	0.212929
Rpn3	trough	24	8	16	5.26316e-08	1	2.91554	-2.11984	5.03538	-1.37536	-0.802056	0.260326	0.00198123	0.0195505	0.212929
Rab7	trough	24	8	16	8.77193e-08	1	2.06105	-2.25878	4.31983	-0.91246	-1.06841	0.260326	0.00198123	0.0195505	0.212929
CadN	trough	24	16	8	7.79104e-18	1	1.54951	-2.20652	3.75603	-0.702242	-0.925982	0.260881	0.00198123	0.0195505	0.212929
CG2291	trough	24	20	8	-0.0089208	0.955752	1.60353	-2.6219	4.22542	-0.61159	-1.15337	0.26071	0.00198123	0.0195505	0.212929
CG33330	trough	24	4	16	7.01754e-08	1	2.11892	-2.36149	4.4804	-0.897282	-1.09759	0.26084	0.00198123	0.0195505	0.212929
CG10550	trough	24	16	8	1.75439e-08	1	2.13148	-2.21267	4.34415	-0.963308	-1.08456	0.260881	0.00198123	0.0195505	0.212929
Ipp	trough	24	8	16	-5.26316e-08	1	2.03391	-2.08402	4.11793	-0.975958	-1.09332	0.260326	0.00198123	0.0195505	0.212929
Dat	trough	24	8	8	-7.01754e-08	1	2.25038	-2.48414	4.73452	-0.905897	-1.43342	0.260326	0.00198123	0.0195505	0.212929
Hip14	trough	24	8	16	3.50877e-08	1	1.59553	-2.53986	4.1354	-0.628197	-1.45379	0.260326	0.00198123	0.0195505	0.212929
CG32628	trough	24	20	16	0.0304161	0.973407	1.82346	-3.28591	5.10937	-0.554933	-1.51707	0.260155	0.00198123	0.0195505	0.212929
CG34357	trough	24	4	8	0.0624158	1.01672	2.23285	-2.08975	4.3226	-1.06848	-1.24979	0.26084	0.00198123	0.0195505	0.212929
bgm	trough	24	0	16	-1.94776e-18	1	2.33804	-2.774	5.11204	-0.84284	-0.945325	0.260069	0.00198123	0.0195505	0.212929
Pdk	trough	24	20	16	-1.16866e-17	1	2.30619	-2.80642	5.11261	-0.821753	-1.09109	0.260155	0.00198123	0.0195505	0.212929
Ten-m	trough	24	8	16	-1.75439e-08	1	2.17656	-1.89217	4.06873	-1.15029	-1.08281	0.260326	0.00198123	0.0195505	0.212929
Sh	trough	24	0	16	1.75439e-08	1	1.58071	-3.29241	4.87312	-0.480108	-1.61833	0.260069	0.00198123	0.0195505	0.212929
CG9796	trough	24	16	8	3.89552e-18	1	1.98035	-2.36582	4.34617	-0.837069	-1.21766	0.260881	0.00198123	0.0195505	0.212929
laza	trough	24	0	16	-0.00150292	0.945518	1.73137	-2.32828	4.05965	-0.743624	-0.918596	0.260069	0.00198123	0.0195505	0.212929
cdc14	trough	24	8	16	-0.000644985	0.927098	2.03056	-3.38376	5.41433	-0.600091	-1.11646	0.260326	0.00198123	0.0195505	0.212929
anon-67Ea	trough	24	16	8	-0.0467793	0.928166	1.53703	-2.88635	4.42338	-0.532518	-1.22233	0.259599	0.00207275	0.0203105	0.217392
CG3038	trough	24	20	8	-3.50877e-08	1	1.67749	-2.35217	4.02966	-0.713167	-1.21086	0.259429	0.00207275	0.0203105	0.217392
CG33969	trough	24	16	16	0.0896556	1.0601	2.74818	-3.03087	5.77905	-0.906732	-1.58495	0.259599	0.00207275	0.0203105	0.217392
retinin	trough	24	4	16	3.50877e-08	1	2.21146	-2.47448	4.68595	-0.893707	-1.17198	0.259555	0.00207275	0.0203105	0.217392
CG12128	trough	24	12	16	-0.0179318	0.991913	1.79288	-2.9232	4.71608	-0.613327	-1.46031	0.259429	0.00207275	0.0203105	0.217392
CG4164	trough	24	8	16	-1.75439e-08	1	1.91304	-1.75538	3.66842	-1.08981	-1.09128	0.259043	0.00207275	0.0203105	0.217392
CG4733	trough	24	8	16	0.0104105	0.992849	1.52333	-2.70004	4.22337	-0.564188	-1.12982	0.259043	0.00207275	0.0203105	0.217392
Cpr92F	trough	24	20	8	-0.0618146	0.95846	1.65696	-2.08081	3.73778	-0.796306	-0.878965	0.259429	0.00207275	0.0203105	0.217392
CG1969	trough	24	12	8	-0.0571218	0.95709	1.53462	-3.14168	4.6763	-0.488472	-1.43341	0.259429	0.00207275	0.0203105	0.217392
CG8965	trough	24	16	16	-0.0429815	0.998493	1.86065	-2.6658	4.52645	-0.69797	-1.15639	0.259599	0.00207275	0.0203105	0.217392
CG15011	trough	24	16	16	-0.0369846	0.942863	1.50697	-2.86164	4.3686	-0.52661	-1.26945	0.259599	0.00207275	0.0203105	0.217392
Amph	trough	24	20	16	0.00625269	0.992293	1.89863	-2.65283	4.55146	-0.715698	-1.1366	0.258874	0.00207275	0.0203105	0.217392
CG3036	trough	24	20	8	7.01754e-08	1	2.06159	-2.11811	4.1797	-0.973318	-1.06261	0.259429	0.00207275	0.0203105	0.217392
Cyp9h1	trough	24	20	8	7.79104e-18	1	1.96404	-2.06497	4.02901	-0.951122	-1.04216	0.259429	0.00207275	0.0203105	0.217392
CG31103	trough	24	20	8	8.77193e-08	1	2.27662	-2.05099	4.32761	-1.11001	-1.09768	0.259429	0.00207275	0.0203105	0.217392
CG6498	trough	24	4	16	1.75439e-08	1	1.98976	-2.40155	4.39131	-0.82853	-1.24013	0.25827	0.00216805	0.0212005	0.223325
Act57B	trough	24	4	16	5.26316e-08	1	1.97819	-2.34271	4.3209	-0.844404	-0.931775	0.25827	0.00216805	0.0212005	0.223325
CAP-D2	trough	24	12	16	3.50877e-08	1	2.08819	-2.91639	5.00458	-0.716018	-1.15326	0.258148	0.00216805	0.0212005	0.223325
CG13116	trough	24	8	8	0.0160694	0.988028	1.60712	-2.68539	4.29251	-0.598467	-1.20367	0.257761	0.00216805	0.0212005	0.223325
CG3906	trough	24	12	16	-0.0905865	1.00658	1.7051	-2.69629	4.40139	-0.632386	-0.718455	0.258148	0.00216805	0.0212005	0.223325
CG14220	trough	24	12	8	5.26316e-08	1	1.80824	-3.04034	4.84858	-0.59475	-2.77287	0.258148	0.00216805	0.0212005	0.223325
Usf	trough	24	4	16	3.50877e-08	1	1.33057	-2.55753	3.88811	-0.520256	-1.22617	0.25827	0.00216805	0.0212005	0.223325
CG1640	trough	24	4	8	-2.82425e-17	1	2.7398	-2.36202	5.10182	-1.15994	-0.782778	0.25827	0.00216805	0.0212005	0.223325
vkg	trough	24	16	8	1.75439e-08	1	1.95854	-2.75691	4.71544	-0.710412	-1.41087	0.258317	0.00216805	0.0212005	0.223325
CG8531	trough	24	20	8	3.50877e-08	1	2.32719	-2.63553	4.96272	-0.883005	-0.861574	0.258148	0.00216805	0.0212005	0.223325
CG7791	trough	24	16	8	1.75439e-08	1	1.49678	-2.92721	4.42399	-0.511333	-1.09988	0.258317	0.00216805	0.0212005	0.223325
CG17996	trough	24	16	16	-0.00706814	0.985709	1.89616	-2.31072	4.20687	-0.820592	-1.12315	0.258317	0.00216805	0.0212005	0.223325
CG17344	trough	24	20	8	0.0369901	0.94285	1.97835	-1.90744	3.88579	-1.03717	-1.00472	0.258148	0.00216805	0.0212005	0.223325
Kr-h1	trough	24	20	8	3.89552e-18	1	2.79287	-1.86921	4.66207	-1.49415	-1.01547	0.258148	0.00216805	0.0212005	0.223325
slo	trough	24	12	16	-0.00407713	0.967312	2.30498	-2.56461	4.86959	-0.898761	-1.1743	0.256867	0.00226726	0.0220205	0.22633
sip2	trough	24	16	16	0.214856	1.10404	2.46233	-2.37144	4.83377	-1.03832	-4.43901	0.257035	0.00226726	0.0220205	0.22633
CG17652	trough	24	4	8	-1.75439e-08	1	1.58054	-3.23543	4.81596	-0.48851	-1.25078	0.256985	0.00226726	0.0220205	0.22633
CG5646	trough	24	12	16	-0.0556937	1.05662	2.04269	-2.59767	4.64036	-0.786352	-0.846653	0.256867	0.00226726	0.0220205	0.22633
nmo	trough	24	8	16	0.00073503	0.991205	1.90901	-2.4747	4.38371	-0.771412	-1.26644	0.256479	0.00226726	0.0220205	0.22633
Obp50e	trough	24	12	8	0.0230743	1.00106	2.43101	-2.58694	5.01795	-0.939725	-1.87304	0.256867	0.00226726	0.0220205	0.22633
porin	trough	24	8	8	1.75439e-08	1	1.87831	-3.04276	4.92107	-0.617306	-1.26407	0.256479	0.00226726	0.0220205	0.22633
CG3534	trough	24	12	8	3.50877e-08	1	1.69447	-2.85207	4.54654	-0.594121	-0.937083	0.256867	0.00226726	0.0220205	0.22633
Arr1	trough	24	8	8	-1.75439e-08	1	1.74723	-2.36054	4.10777	-0.740182	-0.928689	0.256479	0.00226726	0.0220205	0.22633
hrg	trough	24	8	16	4.8694e-17	1	1.97323	-3.16723	5.14046	-0.623016	-1.10988	0.256479	0.00226726	0.0220205	0.22633
CG12708	trough	24	4	16	3.50877e-08	1	2.22761	-2.33662	4.56423	-0.953348	-1.07469	0.256985	0.00226726	0.0220205	0.22633
twi	trough	24	4	16	0.0310088	0.952934	1.48281	-3.09581	4.57862	-0.478974	-1.6805	0.256985	0.00226726	0.0220205	0.22633
sei	trough	24	20	16	-8.77193e-08	1	1.88226	-2.71505	4.59731	-0.693269	-1.24495	0.25631	0.00226726	0.0220205	0.22633
CG6843	trough	24	16	8	0.140181	1.11256	2.66623	-2.83324	5.49947	-0.941052	-1.79964	0.257035	0.00226726	0.0220205	0.22633
CG13895	trough	24	8	8	-0.0191242	0.955221	1.43055	-2.72132	4.15187	-0.525683	-1.3664	0.256479	0.00226726	0.0220205	0.22633
Osi2	trough	24	4	8	-0.0159664	0.998365	2.35755	-2.34269	4.70023	-1.00634	-0.95688	0.256985	0.00226726	0.0220205	0.22633
CG13255	trough	24	16	16	-1.75439e-08	1	2.81476	-2.17026	4.98502	-1.29697	-0.889172	0.257035	0.00226726	0.0220205	0.22633
CG10289	trough	24	8	16	1.75439e-08	1	2.50189	-2.10678	4.60866	-1.18754	-1.0629	0.256479	0.00226726	0.0220205	0.22633
Gasp	trough	24	8	8	-1.75439e-08	1	2.25296	-2.23547	4.48843	-1.00782	-1.21887	0.256479	0.00226726	0.0220205	0.22633
Cyp6a17	trough	24	0	8	0.0525024	1.0692	2.52893	-2.82578	5.35471	-0.894951	-1.26175	0.257494	0.00226726	0.0220205	0.22633
CG18666	trough	24	0	16	-0.171426	1.01603	1.75755	-3.07292	4.83047	-0.571949	-0.837829	0.257494	0.00226726	0.0220205	0.22633
CG3860	trough	24	16	16	3.50877e-08	1	2.37985	-2.19491	4.57476	-1.08426	-1.21567	0.257035	0.00226726	0.0220205	0.22633
CG3149	trough	24	12	16	5.84328e-18	1	1.90955	-3.09928	5.00882	-0.616126	-1.30892	0.255586	0.00237052	0.0229905	0.230947
fng	trough	24	16	8	1.75439e-08	1	2.04626	-2.12306	4.16932	-0.963823	-1.06857	0.255753	0.00237052	0.0229905	0.230947
CG5149	trough	24	20	8	2.72686e-17	1	2.09506	-2.25875	4.35381	-0.927529	-1.17068	0.255586	0.00237052	0.0229905	0.230947
SP2637	trough	24	4	16	0.0238727	1.0107	1.89301	-3.34842	5.24144	-0.565345	-3.64737	0.2557	0.00237052	0.0229905	0.230947
Nmda1	trough	24	16	8	1.75439e-08	1	2.73039	-1.88998	4.62036	-1.44467	-1.18196	0.255753	0.00237052	0.0229905	0.230947
CG11741	trough	24	16	8	5.26316e-08	1	1.98229	-2.64271	4.62499	-0.750096	-1.25526	0.255753	0.00237052	0.0229905	0.230947
CG4721	trough	24	8	16	-1.75439e-08	1	1.97581	-2.32616	4.30197	-0.849385	-1.017	0.255196	0.00237052	0.0229905	0.230947
CG12703	trough	24	8	16	7.01754e-08	1	2.38649	-1.9797	4.36619	-1.20548	-1.14115	0.255196	0.00237052	0.0229905	0.230947
mthl5	trough	24	4	8	-4.8694e-18	1	1.89562	-3.27695	5.17257	-0.57847	-1.1574	0.2557	0.00237052	0.0229905	0.230947
CG1021	trough	24	8	16	0.0531645	1.02275	1.88195	-2.27373	4.15569	-0.827694	-1.46443	0.255196	0.00237052	0.0229905	0.230947
CG31550	trough	24	20	8	-3.31119e-17	1	2.21913	-1.97818	4.19731	-1.1218	-1.10988	0.255586	0.00237052	0.0229905	0.230947
yellow-d	trough	24	16	16	-1.75439e-08	1	1.99249	-2.11798	4.11047	-0.940752	-1.77349	0.255753	0.00237052	0.0229905	0.230947
wde	trough	24	16	16	1.75439e-08	1	2.21331	-2.76966	4.98297	-0.799126	-1.20184	0.255753	0.00237052	0.0229905	0.230947
CG10158	trough	24	8	16	5.26316e-08	1	2.69709	-2.22981	4.92689	-1.20956	-1.20899	0.255196	0.00237052	0.0229905	0.230947
CG11241	trough	24	16	8	-0.0373094	0.980354	2.32068	-3.05043	5.37111	-0.760772	-1.25604	0.255753	0.00237052	0.0229905	0.230947
Ca-alpha1T	trough	24	0	8	0.103499	1.02984	2.80931	-2.68375	5.49306	-1.04679	-1.33446	0.256207	0.00237052	0.0229905	0.230947
asf1	trough	24	0	8	-1.75439e-08	1	2.15539	-2.78293	4.93832	-0.774503	-1.82297	0.256207	0.00237052	0.0229905	0.230947
cato	trough	24	16	8	-3.50877e-08	1	2.17073	-2.6141	4.78483	-0.830389	-1.89519	0.255753	0.00237052	0.0229905	0.230947
fdl	trough	24	20	8	1.75439e-08	1	1.7421	-2.4195	4.1616	-0.720022	-0.795712	0.255586	0.00237052	0.0229905	0.230947
obst-A	trough	24	4	16	1.75439e-08	1	2.08562	-2.30552	4.39115	-0.904621	-1.14293	0.2557	0.00237052	0.0229905	0.230947
CG17224	trough	24	12	16	1.75439e-08	1	1.65673	-2.92736	4.58409	-0.565948	-1.61459	0.255586	0.00237052	0.0229905	0.230947
CG14341	trough	24	4	16	1.75439e-08	1	2.02973	-2.32112	4.35084	-0.87446	-1.10204	0.254415	0.00247798	0.0238905	0.236417
CG6745	trough	24	12	16	-1.75439e-08	1	2.35139	-2.28542	4.6368	-1.02886	-1.12034	0.254305	0.00247798	0.0238905	0.236417
CG3326	trough	24	16	8	-0.0251234	1.00886	1.54376	-3.56476	5.10852	-0.433062	-1.9212	0.254471	0.00247798	0.0238905	0.236417
CG10933	trough	24	0	8	0.085781	1.07425	2.36057	-2.41887	4.77944	-0.9759	-1.56724	0.254919	0.00247798	0.0238905	0.236417
CG10211	trough	24	4	16	-0.0320492	0.982305	2.22207	-2.77527	4.99734	-0.800668	-0.955302	0.254415	0.00247798	0.0238905	0.236417
CG11368	trough	24	4	16	-5.26316e-08	1	2.07476	-2.33996	4.41472	-0.886666	-0.861704	0.254415	0.00247798	0.0238905	0.236417
CG1622	trough	24	12	8	1.16866e-17	1	2.4375	-2.17942	4.61691	-1.11842	-0.903612	0.254305	0.00247798	0.0238905	0.236417
RhoBTB	trough	24	16	16	3.31119e-17	1	1.98166	-2.38155	4.36321	-0.83209	-1.10466	0.254471	0.00247798	0.0238905	0.236417
lva	trough	24	8	8	-2.33731e-17	1	2.14234	-3.48448	5.62681	-0.614822	-1.18532	0.253914	0.00247798	0.0238905	0.236417
Pcmt	trough	24	4	8	0.0623448	1.01851	2.28401	-2.51701	4.80102	-0.907428	-1.30504	0.254415	0.00247798	0.0238905	0.236417
Tace	trough	24	16	8	3.50877e-08	1	3.15573	-2.18445	5.34018	-1.44464	-0.985824	0.254471	0.00247798	0.0238905	0.236417
CG4462	trough	24	0	16	1.75439e-08	1	2.4472	-2.4511	4.8983	-0.998407	-1.02799	0.254919	0.00247798	0.0238905	0.236417
CG14962	trough	24	4	16	-1.75439e-08	1	2.20972	-3.00933	5.21905	-0.734289	-1.32566	0.254415	0.00247798	0.0238905	0.236417
Cyp6a9	trough	24	20	8	-5.26316e-08	1	1.91621	-2.09904	4.01525	-0.912899	-1.20053	0.254305	0.00247798	0.0238905	0.236417
CG5089	trough	24	16	16	-0.0141903	0.987675	2.53835	-1.69904	4.23739	-1.49399	-1.05424	0.25319	0.00258978	0.0246805	0.239152
RluA-1	trough	24	16	8	0.0361479	1.02744	2.06043	-3.1012	5.16163	-0.664399	-2.2643	0.25319	0.00258978	0.0246805	0.239152
CG13407	trough	24	4	16	-0.0522186	0.887425	1.36247	-2.86683	4.2293	-0.475255	-1.19023	0.25313	0.00258978	0.0246805	0.239152
CG7675	trough	24	4	16	5.26316e-08	1	2.0636	-1.87381	3.93741	-1.10129	-1.16126	0.25313	0.00258978	0.0246805	0.239152
CG42340	trough	24	12	8	-0.0169805	1.00461	2.11193	-3.08206	5.19399	-0.685234	-1.36563	0.253024	0.00258978	0.0246805	0.239152
CG15435	trough	24	4	16	-0.137526	1.0554	1.63971	-2.68587	4.32558	-0.610497	-0.950813	0.25313	0.00258978	0.0246805	0.239152
Cat	trough	24	8	16	1.75439e-08	1	1.83741	-2.50158	4.33899	-0.734502	-1.4216	0.252631	0.00258978	0.0246805	0.239152
Arr2	trough	24	4	8	-5.84328e-18	1	1.90515	-1.9523	3.85745	-0.975845	-1.09924	0.25313	0.00258978	0.0246805	0.239152
RanGap	trough	24	16	8	1.75439e-08	1	1.57321	-2.85705	4.43027	-0.550642	-1.53466	0.25319	0.00258978	0.0246805	0.239152
CG31792	trough	24	8	16	-0.0107697	1.00501	1.70135	-2.89096	4.59231	-0.588507	-1.41091	0.252631	0.00258978	0.0246805	0.239152
CG2854	trough	24	12	16	0.0904806	0.973783	1.68168	-3.01593	4.69762	-0.557599	-2.13782	0.253024	0.00258978	0.0246805	0.239152
CG10592	trough	24	0	8	0.00676325	0.947293	1.7029	-2.12354	3.82644	-0.801913	-0.965129	0.253632	0.00258978	0.0246805	0.239152
PR2	trough	24	8	16	-0.0288196	0.958384	1.39333	-2.89625	4.28958	-0.481079	-1.35077	0.252631	0.00258978	0.0246805	0.239152
CG6379	trough	24	0	16	-0.0330221	0.904747	1.70402	-3.2719	4.97592	-0.520805	-1.21369	0.253632	0.00258978	0.0246805	0.239152
CG14641	trough	24	8	8	-1.75439e-08	1	2.08176	-2.937	5.01876	-0.708804	-1.13283	0.252631	0.00258978	0.0246805	0.239152
wun	trough	24	20	8	-7.01754e-08	1	2.0361	-3.20525	5.24134	-0.635238	-1.44509	0.253024	0.00258978	0.0246805	0.239152
CG8021	trough	24	20	8	0.00928501	1.02773	1.60471	-3.34996	4.95467	-0.479025	-2.16583	0.253024	0.00258978	0.0246805	0.239152
BHD	trough	24	20	8	0.0157546	1.00745	1.58824	-2.27805	3.86629	-0.697194	-1.41489	0.253024	0.00258978	0.0246805	0.239152
CG15386	trough	24	20	16	-3.50877e-08	1	1.8584	-2.2897	4.1481	-0.811637	-0.856404	0.253747	0.00258978	0.0246805	0.239152
CG4038	trough	24	20	8	-9.7388e-18	1	3.22512	-2.0344	5.25952	-1.58529	-0.799243	0.253024	0.00258978	0.0246805	0.239152
CG9451	trough	24	0	16	1.75439e-08	1	2.28105	-2.20609	4.48714	-1.03398	-0.946765	0.252344	0.00270607	0.0256105	0.241137
CG7227	trough	24	12	8	-3.50877e-08	1	1.57098	-2.40989	3.98087	-0.651886	-2.43217	0.251743	0.00270607	0.0256105	0.241137
betaTub97EF	trough	24	12	16	1.75439e-08	1	1.80224	-2.32386	4.1261	-0.775535	-1.27753	0.251743	0.00270607	0.0256105	0.241137
l(1)G0222	trough	24	4	16	1.75439e-08	1	1.82552	-2.82772	4.65323	-0.64558	-1.46161	0.251845	0.00270607	0.0256105	0.241137
CG32987	trough	24	16	8	0.0166798	0.973807	2.12146	-3.05023	5.17169	-0.695506	-1.21651	0.251908	0.00270607	0.0256105	0.241137
sage	trough	24	12	8	-1.75439e-08	1	1.27406	-3.47679	4.75085	-0.366448	-2.50483	0.251743	0.00270607	0.0256105	0.241137
CG11226	trough	24	0	8	0.0826679	1.03062	2.23766	-2.49213	4.7298	-0.89789	-1.39072	0.252344	0.00270607	0.0256105	0.241137
Gs1	trough	24	8	16	1.75439e-08	1	3.37723	-2.20987	5.5871	-1.52825	-0.87131	0.251349	0.00270607	0.0256105	0.241137
CG9795	trough	24	8	16	-1.75439e-08	1	2.35227	-2.18791	4.54018	-1.07512	-0.854694	0.251349	0.00270607	0.0256105	0.241137
l(2)k05819	trough	24	16	8	-4.8694e-19	1	2.37124	-2.33784	4.70908	-1.01429	-1.08097	0.251908	0.00270607	0.0256105	0.241137
CG18327	trough	24	12	8	-1.75439e-08	1	2.00942	-1.60396	3.61338	-1.25279	-0.590602	0.251743	0.00270607	0.0256105	0.241137
Dgkepsilon	trough	24	12	8	1.75439e-08	1	3.38945	-2.22688	5.61633	-1.52207	-0.814212	0.251743	0.00270607	0.0256105	0.241137
Tapdelta	trough	24	12	8	-5.26316e-08	1	2.63639	-2.30938	4.94578	-1.1416	-1.37824	0.251743	0.00270607	0.0256105	0.241137
CG6783	trough	24	4	16	5.26316e-08	1	1.98855	-2.00583	3.99438	-0.991389	-1.18989	0.251845	0.00270607	0.0256105	0.241137
sv	trough	24	16	8	-1.75439e-08	1	1.55242	-2.62731	4.17973	-0.590876	-1.95525	0.251908	0.00270607	0.0256105	0.241137
Trap1	trough	24	20	8	1.75298e-17	1	1.68498	-2.84723	4.53221	-0.591798	-1.50278	0.251743	0.00270607	0.0256105	0.241137
AttC	trough	24	12	16	-1.75439e-08	1	1.94152	-2.40665	4.34818	-0.806732	-0.973547	0.251743	0.00270607	0.0256105	0.241137
sas	trough	24	0	16	-0.0206219	1.00248	1.50306	-2.50716	4.01022	-0.599505	-1.10356	0.252344	0.00270607	0.0256105	0.241137
CG17068	trough	24	8	16	1.75439e-08	1	2.15798	-2.00924	4.16722	-1.07403	-1.29685	0.251349	0.00270607	0.0256105	0.241137
Cdc6	trough	24	4	8	0.00230345	0.991339	2.76702	-3.08792	5.85494	-0.896078	-1.72638	0.251845	0.00270607	0.0256105	0.241137
CG4975	trough	24	16	16	0.0470317	1.05455	1.92784	-3.80082	5.72866	-0.507217	-2.64264	0.251908	0.00270607	0.0256105	0.241137
CG42368	trough	24	4	8	-0.0438261	1.02101	1.92459	-3.63841	5.56299	-0.528964	-1.9861	0.251845	0.00270607	0.0256105	0.241137
Tsp39D	trough	24	4	16	3.11642e-17	1	2.01945	-2.81298	4.83243	-0.717904	-1.09491	0.251845	0.00270607	0.0256105	0.241137
CG42231	trough	24	8	16	3.50877e-08	1	2.25455	-2.24883	4.50338	-1.00254	-1.23651	0.251349	0.00270607	0.0256105	0.241137
TER94	trough	24	8	16	3.16511e-18	1	1.75899	-3.31893	5.07792	-0.529988	-1.35243	0.251349	0.00270607	0.0256105	0.241137
CG7611	trough	24	16	8	3.50877e-08	1	1.45867	-2.94781	4.40647	-0.494831	-1.34966	0.251908	0.00270607	0.0256105	0.241137
numb	trough	24	20	8	5.26316e-08	1	1.81181	-1.80912	3.62093	-1.00149	-1.18793	0.251743	0.00270607	0.0256105	0.241137
Mad	trough	24	8	16	7.01754e-08	1	1.81235	-1.97626	3.7886	-0.917061	-1.12521	0.251349	0.00270607	0.0256105	0.241137
CG7456	trough	24	16	8	-3.50877e-08	1	2.41386	-2.16056	4.57442	-1.11724	-1.10745	0.250626	0.00282701	0.0266405	0.246352
Pros28.1	trough	24	8	16	3.50877e-08	1	2.10817	-2.20608	4.31424	-0.955618	-0.863382	0.250067	0.00282701	0.0266405	0.246352
CG15366	trough	24	16	16	0.0146908	0.969042	1.43163	-2.74727	4.1789	-0.521111	-1.48302	0.250626	0.00282701	0.0266405	0.246352
CG6870	trough	24	20	16	-3.50877e-08	1	2.34928	-2.08822	4.4375	-1.12501	-0.819518	0.251184	0.00282701	0.0266405	0.246352
CG31917	trough	24	12	8	1.75439e-08	1	1.2883	-2.9909	4.2792	-0.430741	-1.09805	0.250461	0.00282701	0.0266405	0.246352
oho23B	trough	24	0	16	-5.26316e-08	1	2.30772	-2.41785	4.72556	-0.954452	-0.967716	0.251057	0.00282701	0.0266405	0.246352
Pkd2	trough	24	0	16	-1.75439e-08	1	2.05014	-3.15097	5.20111	-0.650637	-1.3505	0.251057	0.00282701	0.0266405	0.246352
mmy	trough	24	4	8	1.21735e-17	1	2.43804	-2.02601	4.46404	-1.20337	-1.32212	0.25056	0.00282701	0.0266405	0.246352
Arpc3A	trough	24	8	16	-5.26316e-08	1	1.97526	-2.84804	4.8233	-0.69355	-1.02604	0.250067	0.00282701	0.0266405	0.246352
Axn	trough	24	8	16	-3.50877e-08	1	2.66856	-2.86186	5.53042	-0.932456	-1.16506	0.250067	0.00282701	0.0266405	0.246352
CG33214	trough	24	8	8	0.219299	0.991133	2.12885	-2.96358	5.09243	-0.718339	-2.58998	0.250067	0.00282701	0.0266405	0.246352
Ccp84Ag	trough	24	0	8	-0.0273641	1.02988	1.90013	-2.12849	4.02862	-0.892715	-1.1177	0.251057	0.00282701	0.0266405	0.246352
Moe	trough	24	16	8	-3.50877e-08	1	3.56694	-2.01952	5.58646	-1.76624	-0.888705	0.250626	0.00282701	0.0266405	0.246352
Itp-r83A	trough	24	8	16	2.92164e-18	1	1.85195	-3.03163	4.88358	-0.610874	-2.19314	0.250067	0.00282701	0.0266405	0.246352
pcs	trough	24	0	8	3.50877e-08	1	1.72268	-2.555	4.27768	-0.67424	-1.6208	0.251057	0.00282701	0.0266405	0.246352
CG1265	trough	24	0	8	-3.89552e-18	1	2.04709	-4.28463	6.33172	-0.477775	-2.10972	0.251057	0.00282701	0.0266405	0.246352
CG31778	trough	24	4	8	3.50877e-08	1	2.26654	-1.9318	4.19834	-1.17328	-1.08284	0.25056	0.00282701	0.0266405	0.246352
Nop56	trough	24	20	8	-1.55821e-17	1	2.38845	-2.30384	4.69229	-1.03672	-1.16595	0.250461	0.00282701	0.0266405	0.246352
Ast-CC	trough	24	0	16	-0.0115372	0.994942	1.42892	-2.80782	4.23675	-0.508908	-1.39555	0.249769	0.00295276	0.0277505	0.251619
CG42306	trough	24	8	16	3.50877e-08	1	1.88094	-2.75567	4.63662	-0.682571	-1.34988	0.248784	0.00295276	0.0277505	0.251619
Papss	trough	24	0	16	-3.50877e-08	1	2.16304	-2.55879	4.72183	-0.845339	-1.19635	0.249769	0.00295276	0.0277505	0.251619
didum	trough	24	8	16	1.75439e-08	1	2.41917	-2.23693	4.6561	-1.08147	-1.18126	0.248784	0.00295276	0.0277505	0.251619
Vha36-1	trough	24	20	8	1.75439e-08	1	2.08605	-1.74121	3.82726	-1.19805	-1.0162	0.24918	0.00295276	0.0277505	0.251619
fra	trough	24	8	16	7.01754e-08	1	2.09387	-2.22306	4.31693	-0.941884	-1.17107	0.248784	0.00295276	0.0277505	0.251619
PGRP-SB2	trough	24	4	16	0.017167	0.986862	1.8044	-3.61828	5.42268	-0.49869	-3.27829	0.249275	0.00295276	0.0277505	0.251619
CG11399	trough	24	20	8	8.77193e-08	1	2.79005	-2.68416	5.47422	-1.03945	-1.11012	0.24918	0.00295276	0.0277505	0.251619
CG12355	trough	24	20	8	5.26316e-08	1	2.01623	-1.49385	3.51008	-1.34968	-1.05889	0.24918	0.00295276	0.0277505	0.251619
CG3662	trough	24	16	8	1.75439e-08	1	1.91393	-2.36347	4.27739	-0.809797	-1.4824	0.249344	0.00295276	0.0277505	0.251619
Nmd3	trough	24	20	8	4.8694e-19	1	1.58404	-2.61672	4.20076	-0.605356	-1.30672	0.24918	0.00295276	0.0277505	0.251619
CG11247	trough	24	16	16	1.75439e-08	1	1.86768	-2.70982	4.57749	-0.689227	-1.24929	0.249344	0.00295276	0.0277505	0.251619
CG6208	trough	24	8	8	-0.0220997	1.00525	1.40863	-2.44988	3.85851	-0.574981	-1.37401	0.248784	0.00295276	0.0277505	0.251619
Atg1	trough	24	16	16	7.01754e-08	1	2.25685	-2.08227	4.33912	-1.08384	-1.10876	0.249344	0.00295276	0.0277505	0.251619
CG6808	trough	24	12	16	0.0256927	0.997059	2.38124	-2.26117	4.64241	-1.0531	-1.37393	0.24918	0.00295276	0.0277505	0.251619
Flo	trough	24	8	16	9.7388e-18	1	2.20151	-2.08515	4.28666	-1.0558	-1.20598	0.248784	0.00295276	0.0277505	0.251619
bor	trough	24	16	8	3.50877e-08	1	1.94608	-2.02254	3.96862	-0.962193	-1.11752	0.249344	0.00295276	0.0277505	0.251619
CG6967	trough	24	20	16	0.0239605	0.990812	1.61126	-2.70126	4.31253	-0.596486	-1.33711	0.249903	0.00295276	0.0277505	0.251619
HIP	trough	24	16	8	-1.75439e-08	1	2.95157	-2.55612	5.50769	-1.15471	-1.03933	0.249344	0.00295276	0.0277505	0.251619
Vm26Ab	trough	24	0	8	5.26316e-08	1	2.6729	-1.53984	4.21274	-1.73583	-1.27607	0.249769	0.00295276	0.0277505	0.251619
CG17370	trough	24	4	8	0.0769583	1.03812	2.392	-3.94382	6.33582	-0.606519	-1.22628	0.24799	0.00308347	0.0288005	0.258871
CG5720	trough	24	16	8	-1.75439e-08	1	2.8476	-2.43533	5.28292	-1.16929	-1.18824	0.248062	0.00308347	0.0288005	0.258871
CG7192	trough	24	12	16	3.50877e-08	1	1.4336	-2.53574	3.96934	-0.565359	-1.33221	0.247899	0.00308347	0.0288005	0.258871
CG12017	trough	24	8	16	-0.00034773	0.991193	1.99912	-3.13004	5.12915	-0.638687	-1.38562	0.247502	0.00308347	0.0288005	0.258871
Sec61beta	trough	24	12	8	1.75439e-08	1	3.84356	-1.83446	5.67802	-2.0952	-0.882857	0.247899	0.00308347	0.0288005	0.258871
CG4009	trough	24	16	8	-0.0114089	1.01042	1.42742	-2.33161	3.75903	-0.612202	-1.37477	0.248062	0.00308347	0.0288005	0.258871
Est-6	trough	24	0	8	0	1	2.4685	-2.23651	4.70501	-1.10372	-1.14929	0.248482	0.00308347	0.0288005	0.258871
CG3884	trough	24	8	8	0	1	1.89606	-3.34314	5.2392	-0.56715	-1.36013	0.247502	0.00308347	0.0288005	0.258871
Prosbeta7	trough	24	8	16	-7.01754e-08	1	1.90509	-2.09794	4.00303	-0.908073	-0.970637	0.247502	0.00308347	0.0288005	0.258871
CG4678	trough	24	16	8	-3.89552e-18	1	2.01708	-1.93845	3.95553	-1.04057	-0.981931	0.24678	0.00321931	0.0298605	0.263815
CG11997	trough	24	4	8	0.0239744	1.0073	1.54998	-3.61598	5.16596	-0.428647	-9.0009	0.246706	0.00321931	0.0298605	0.263815
CG42554	trough	24	0	8	0.0673476	0.968194	1.64869	-3.01286	4.66155	-0.547219	-1.60681	0.247195	0.00321931	0.0298605	0.263815
drongo	trough	24	16	8	-1.75439e-08	1	1.92335	-2.28125	4.20461	-0.843113	-1.03917	0.24678	0.00321931	0.0298605	0.263815
140up	trough	24	16	16	0.0642734	1.01049	1.84199	-2.13076	3.97276	-0.864475	-1.24769	0.24678	0.00321931	0.0298605	0.263815
CG14985	trough	24	12	16	-0.0132378	1.07336	2.63941	-1.98859	4.628	-1.32727	-1.2272	0.246618	0.00321931	0.0298605	0.263815
CG4335	trough	24	0	16	-0.0894007	1.05603	1.43142	-3.29756	4.72898	-0.434086	-1.18956	0.247195	0.00321931	0.0298605	0.263815
CG6074	trough	24	12	8	5.26316e-08	1	2.45957	-3.01557	5.47513	-0.815623	-1.26592	0.246618	0.00321931	0.0298605	0.263815
HERC2	trough	24	4	8	1.75439e-08	1	1.90577	-2.30793	4.2137	-0.82575	-1.17713	0.246706	0.00321931	0.0298605	0.263815
CG5589	trough	24	12	16	-0.034931	0.918359	1.57644	-2.53286	4.10931	-0.622396	-1.59852	0.246618	0.00321931	0.0298605	0.263815
CG2975	trough	24	4	16	-0.06613	1.02743	2.51522	-2.70685	5.22207	-0.929205	-1.0656	0.246706	0.00321931	0.0298605	0.263815
CG5337	trough	24	16	8	5.26316e-08	1	2.20977	-2.83442	5.04419	-0.779618	-1.43279	0.24678	0.00321931	0.0298605	0.263815
Aats-trp	trough	24	16	8	1.75439e-08	1	1.89337	-3.07792	4.97129	-0.615147	-1.61492	0.24678	0.00321931	0.0298605	0.263815
Hs3st-B	trough	24	16	8	0.062693	0.922629	1.51635	-2.5764	4.09275	-0.588553	-1.6337	0.24678	0.00321931	0.0298605	0.263815
CG15925	trough	24	4	16	0.0331629	0.980265	1.46002	-3.26954	4.72957	-0.446551	-1.19545	0.246706	0.00321931	0.0298605	0.263815
CG9864	trough	24	12	16	0.0528155	0.987334	1.6566	-3.40382	5.06041	-0.486687	-1.68172	0.246618	0.00321931	0.0298605	0.263815
CG8353	trough	24	0	8	5.26316e-08	1	1.72992	-2.49493	4.22484	-0.693373	-1.25382	0.247195	0.00321931	0.0298605	0.263815
CG13641	trough	24	20	16	0.0536651	0.983269	2.21032	-2.59063	4.80095	-0.853201	-1.24341	0.24734	0.00321931	0.0298605	0.263815
CG14540	trough	24	16	16	0.0514443	0.977402	1.77111	-2.9369	4.70801	-0.603055	-1.65266	0.245498	0.00336047	0.0311605	0.268922
CG9104	trough	24	12	8	-0.00529718	1.00518	1.97384	-2.5263	4.50014	-0.781316	-1.18398	0.245337	0.00336047	0.0311605	0.268922
Baldspot	trough	24	0	16	0.0638091	0.906291	2.33602	-1.42167	3.7577	-1.64315	-1.05807	0.245907	0.00336047	0.0311605	0.268922
CG8184	trough	24	8	16	-1.05263e-07	1	1.87997	-2.21726	4.09723	-0.847879	-1.35457	0.246219	0.00336047	0.0311605	0.268922
CG6719	trough	24	8	16	3.50877e-08	1	2.27826	-1.99055	4.26881	-1.14454	-1.32526	0.246219	0.00336047	0.0311605	0.268922
CG6686	trough	24	20	8	1.75439e-08	1	2.06985	-2.38183	4.45167	-0.869017	-1.47483	0.245337	0.00336047	0.0311605	0.268922
Irk2	trough	24	16	8	-5.26316e-08	1	1.66415	-2.82987	4.49402	-0.588066	-1.14293	0.245498	0.00336047	0.0311605	0.268922
CG14414	trough	24	12	8	-0.108842	1.03212	1.50404	-3.76333	5.26737	-0.399656	-1.2585	0.245337	0.00336047	0.0311605	0.268922
CG4199	trough	24	8	16	-3.50877e-08	1	2.29104	-2.22545	4.51649	-1.02947	-1.79622	0.246219	0.00336047	0.0311605	0.268922
CG13322	trough	24	8	8	-0.000685932	0.991203	2.04992	-2.76103	4.81095	-0.74245	-1.32333	0.246219	0.00336047	0.0311605	0.268922
rdo	trough	24	8	16	2.72686e-17	1	2.70218	-2.18825	4.89043	-1.23486	-0.944807	0.246219	0.00336047	0.0311605	0.268922
Cdc37	trough	24	12	8	-0.0147171	0.997289	1.82051	-3.25514	5.07565	-0.559272	-1.052	0.245337	0.00336047	0.0311605	0.268922
CG12206	trough	24	16	8	-0.00331037	1.00416	1.66254	-3.20708	4.86963	-0.518397	-1.27593	0.245498	0.00336047	0.0311605	0.268922
CG17300	trough	24	8	8	0.128355	1.05883	2.29217	-2.65632	4.94848	-0.862911	-1.48138	0.246219	0.00336047	0.0311605	0.268922
CG14811	trough	24	20	8	0.00405442	1.01855	1.95791	-2.1137	4.07161	-0.926296	-1.17562	0.245337	0.00336047	0.0311605	0.268922
CG3527	trough	24	20	8	-0.0199995	0.968777	1.65297	-3.19321	4.84618	-0.517651	-0.796317	0.245337	0.00336047	0.0311605	0.268922
nyo	trough	24	0	16	0.00826742	0.942501	1.47423	-3.50157	4.97579	-0.421019	-1.87342	0.245907	0.00336047	0.0311605	0.268922
PpD3	trough	24	12	16	-1.75439e-08	1	2.45137	-2.77952	5.23089	-0.881941	-1.96673	0.245337	0.00336047	0.0311605	0.268922
CG14650	trough	24	20	8	-5.26316e-08	1	2.10836	-2.5696	4.67796	-0.820499	-1.48844	0.245337	0.00336047	0.0311605	0.268922
Dcp1	trough	24	12	16	0.0626763	0.992927	1.64533	-2.69301	4.33835	-0.610963	-3.16102	0.245337	0.00336047	0.0311605	0.268922
l(2)gl	trough	24	20	8	-1.75439e-08	1	2.14565	-2.90256	5.04821	-0.739228	-1.75513	0.245337	0.00336047	0.0311605	0.268922
CG12081	trough	24	16	8	0.0494221	1.0307	2.56187	-2.57733	5.13921	-0.994001	-1.56045	0.245498	0.00336047	0.0311605	0.268922
yellow-h	trough	24	8	16	-1.75439e-08	1	1.80547	-2.29501	4.10047	-0.786693	-1.4185	0.246219	0.00336047	0.0311605	0.268922
CG5731	trough	24	20	16	-0.151199	1.03288	1.46665	-2.76526	4.23191	-0.530383	-0.772561	0.246058	0.00336047	0.0311605	0.268922
nimB2	trough	24	16	8	-3.50877e-08	1	2.50933	-2.57298	5.0823	-0.975261	-0.981987	0.245498	0.00336047	0.0311605	0.268922
CG9391	trough	24	4	8	0.0479316	1.04429	2.82648	-2.10671	4.9332	-1.34165	-1.44596	0.244136	0.0035071	0.0323805	0.274365
CG10853	trough	24	0	8	-0.0688237	1.01302	1.57231	-2.92499	4.49729	-0.537542	-1.28669	0.24462	0.0035071	0.0323805	0.274365
CG7375	trough	24	20	16	-8.77193e-08	1	1.83587	-2.3376	4.17347	-0.785367	-1.26498	0.244776	0.0035071	0.0323805	0.274365
CG5728	trough	24	20	16	-1.75439e-08	1	1.94433	-2.7941	4.73843	-0.69587	-1.288	0.244776	0.0035071	0.0323805	0.274365
CG2941	trough	24	8	8	-0.032035	1.00844	2.31282	-2.98761	5.30043	-0.774136	-1.12232	0.244937	0.0035071	0.0323805	0.274365
CG8009	trough	24	8	8	-1.75439e-08	1	1.73932	-2.91017	4.64949	-0.597669	-1.41445	0.244937	0.0035071	0.0323805	0.274365
CG10591	trough	24	8	16	-3.50877e-08	1	1.70812	-3.15875	4.86687	-0.540758	-1.36468	0.244937	0.0035071	0.0323805	0.274365
CG6908	trough	24	4	16	-5.26316e-08	1	1.62379	-3.13403	4.75782	-0.518117	-1.5714	0.244136	0.0035071	0.0323805	0.274365
CG10673	trough	24	12	8	-0.0298703	0.971927	1.90154	-2.61909	4.52063	-0.726033	-0.849256	0.244056	0.0035071	0.0323805	0.274365
l(3)neo18	trough	24	16	16	5.26316e-08	1	2.02351	-1.87473	3.89824	-1.07936	-0.987056	0.244216	0.0035071	0.0323805	0.274365
CG31635	trough	24	0	8	-0.0309723	1.01793	1.88016	-2.07036	3.95052	-0.908134	-1.23669	0.24462	0.0035071	0.0323805	0.274365
Df31	trough	24	4	16	0.00172988	0.991274	1.43501	-3.00414	4.43914	-0.477676	-1.40547	0.244136	0.0035071	0.0323805	0.274365
Faa	trough	24	4	8	-0.0093554	0.97826	2.03936	-2.85755	4.89691	-0.713675	-1.41259	0.244136	0.0035071	0.0323805	0.274365
Ctr1A	trough	24	8	8	-5.26316e-08	1	1.95021	-2.35367	4.30388	-0.828583	-1.00218	0.244937	0.0035071	0.0323805	0.274365
Or71a	trough	24	16	8	0.0758722	1.06043	2.35483	-3.26996	5.62479	-0.720141	-1.64082	0.244216	0.0035071	0.0323805	0.274365
l(3)87Df	trough	24	16	16	1.75439e-08	1	2.06566	-3.10971	5.17537	-0.664262	-1.21315	0.244216	0.0035071	0.0323805	0.274365
CG12091	trough	24	20	8	3.50877e-08	1	2.84175	-2.59986	5.44162	-1.09304	-0.888291	0.244056	0.0035071	0.0323805	0.274365
l(2)k14710	trough	24	8	16	-7.01754e-08	1	2.20346	-1.85672	4.06018	-1.18674	-0.88713	0.244937	0.0035071	0.0323805	0.274365
CG15088	trough	24	0	16	-5.26316e-08	1	1.7685	-2.70614	4.47464	-0.653516	-1.93561	0.24462	0.0035071	0.0323805	0.274365
CG6357	trough	24	20	8	-1.75439e-08	1	2.3472	-2.30717	4.65437	-1.01735	-1.19791	0.244056	0.0035071	0.0323805	0.274365
Tektin-A	trough	24	0	16	-0.040358	1.14411	3.04173	-2.77307	5.8148	-1.09688	-1.29266	0.243332	0.0036594	0.0337705	0.279778
CG2063	trough	24	16	8	-3.50877e-08	1	1.89346	-2.44798	4.34144	-0.77348	-1.42807	0.242934	0.0036594	0.0337705	0.279778
CG12428	trough	24	4	16	-5.26316e-08	1	2.27227	-2.85956	5.13184	-0.794623	-1.49189	0.242851	0.0036594	0.0337705	0.279778
CG42329	trough	24	0	16	0.0117974	0.990531	1.55934	-2.54085	4.10019	-0.613707	-1.66856	0.243332	0.0036594	0.0337705	0.279778
alphaTub84D	trough	24	20	16	-1.75439e-08	1	1.9629	-1.9418	3.9047	-1.01087	-1.15064	0.243495	0.0036594	0.0337705	0.279778
Gap69C	trough	24	8	16	-1.75439e-08	1	3.39193	-2.67559	6.06752	-1.26773	-1.12862	0.243655	0.0036594	0.0337705	0.279778
CG12078	trough	24	20	8	0.0301468	0.948009	1.93145	-2.40741	4.33887	-0.802294	-1.30076	0.242775	0.0036594	0.0337705	0.279778
Cyp4g15	trough	24	4	16	0	1	3.01144	-2.47431	5.48575	-1.21708	-0.866038	0.242851	0.0036594	0.0337705	0.279778
CG1582	trough	24	8	16	0.00407629	0.983387	1.83893	-2.6791	4.51803	-0.686398	-1.40713	0.243655	0.0036594	0.0337705	0.279778
CG1041	trough	24	8	16	1.75439e-08	1	1.40402	-2.63127	4.03528	-0.533589	-1.2731	0.243655	0.0036594	0.0337705	0.279778
CG17572	trough	24	16	8	-3.50877e-08	1	1.63889	-2.91491	4.5538	-0.562244	-1.3376	0.242934	0.0036594	0.0337705	0.279778
CG1890	trough	24	8	16	0.0759508	1.02588	1.99066	-2.84949	4.84015	-0.698601	-1.2386	0.243655	0.0036594	0.0337705	0.279778
twe	trough	24	4	16	-0.0572285	0.962332	1.75687	-2.48786	4.24473	-0.706179	-1.0921	0.242851	0.0036594	0.0337705	0.279778
Rh50	trough	24	20	16	1.16866e-17	1	2.22584	-2.1164	4.34224	-1.05171	-0.954564	0.243495	0.0036594	0.0337705	0.279778
CheB93a	trough	24	4	16	0.0197078	1.0021	1.95178	-3.57397	5.52574	-0.546109	-1.85218	0.242851	0.0036594	0.0337705	0.279778
CG10514	trough	24	20	8	0.0355388	0.993633	1.52732	-2.85119	4.37851	-0.53568	-4.12102	0.242775	0.0036594	0.0337705	0.279778
CG11897	trough	24	16	8	7.01754e-08	1	1.76417	-2.0088	3.77297	-0.878221	-0.960044	0.242934	0.0036594	0.0337705	0.279778
CG2976	trough	24	8	8	-1.75298e-17	1	1.78089	-2.52054	4.30143	-0.706551	-1.17209	0.243655	0.0036594	0.0337705	0.279778
olf186-F	trough	24	16	8	7.01754e-08	1	2.76293	-2.43371	5.19663	-1.13527	-0.983857	0.242934	0.0036594	0.0337705	0.279778
GLaz	trough	24	20	16	1.75439e-08	1	2.40862	-3.28355	5.69217	-0.733542	-1.41252	0.243495	0.0036594	0.0337705	0.279778
CG8414	trough	24	0	16	0.0156201	0.998058	1.88583	-2.45229	4.33812	-0.769006	-1.44856	0.242764	0.0036594	0.0337705	0.279778
Spn27A	trough	24	16	16	0.0230646	1.0061	1.60715	-2.89966	4.50681	-0.554255	-1.59576	0.242934	0.0036594	0.0337705	0.279778
CYLD	trough	24	20	8	-3.50877e-08	1	2.03633	-2.56754	4.60387	-0.793109	-1.3957	0.242775	0.0036594	0.0337705	0.279778
debcl	trough	24	16	16	-1.16866e-17	1	2.95175	-1.85187	4.80362	-1.59392	-1.04526	0.242934	0.0036594	0.0337705	0.279778
desat1	trough	24	16	8	3.50877e-08	1	2.57337	-1.81035	4.38372	-1.42148	-0.709599	0.242934	0.0036594	0.0337705	0.279778
CG3476	trough	24	12	16	-3.50877e-08	1	1.82085	-3.85396	5.67481	-0.472461	-1.97928	0.241493	0.00381754	0.0352005	0.285529
Spargel	trough	24	0	16	-3.50877e-08	1	2.53087	-2.22267	4.75354	-1.13867	-1.06854	0.242045	0.00381754	0.0352005	0.285529
CG7656	trough	24	8	16	-0.00912839	0.99354	2.1126	-2.82724	4.93985	-0.747232	-1.54112	0.242372	0.00381754	0.0352005	0.285529
CG4554	trough	24	0	16	-0.0683263	0.988435	1.70777	-2.50132	4.20909	-0.682746	-0.868746	0.242045	0.00381754	0.0352005	0.285529
ncd	trough	24	8	8	-0.0437101	0.960499	1.38352	-3.20102	4.58454	-0.432213	-1.39266	0.242372	0.00381754	0.0352005	0.285529
FBX011	trough	24	4	16	-7.01754e-08	1	2.09016	-2.3405	4.43065	-0.893041	-1.3305	0.241566	0.00381754	0.0352005	0.285529
CG12907	trough	24	16	8	0.00547595	1.01075	1.70411	-2.34675	4.05085	-0.726158	-1.14295	0.241652	0.00381754	0.0352005	0.285529
CG34406	trough	24	0	16	-1.75439e-08	1	2.31744	-2.34402	4.66146	-0.988662	-0.967473	0.242045	0.00381754	0.0352005	0.285529
Taf4	trough	24	8	16	-1.75439e-08	1	2.08422	-2.12921	4.21343	-0.97887	-1.02254	0.242372	0.00381754	0.0352005	0.285529
CG17739	trough	24	8	16	-3.50877e-08	1	2.22771	-2.89627	5.12398	-0.769166	-1.81302	0.242372	0.00381754	0.0352005	0.285529
l(3)73Ah	trough	24	8	8	-0.0131537	0.996065	2.03795	-2.82223	4.86017	-0.722106	-1.32661	0.242372	0.00381754	0.0352005	0.285529
CG7158	trough	24	16	16	3.50877e-08	1	2.49277	-3.40049	5.89326	-0.733064	-0.902214	0.241652	0.00381754	0.0352005	0.285529
CG13117	trough	24	16	8	3.89552e-18	1	2.01947	-2.66633	4.6858	-0.757396	-1.26247	0.241652	0.00381754	0.0352005	0.285529
CG6660	trough	24	20	8	0.0124036	1.01836	1.73812	-2.53411	4.27222	-0.68589	-1.53707	0.241493	0.00381754	0.0352005	0.285529
GRHR	trough	24	8	16	1.75439e-08	1	2.25748	-2.97867	5.23615	-0.757883	-1.10159	0.242372	0.00381754	0.0352005	0.285529
CG4908	trough	24	16	8	0.0188713	1.0012	1.61304	-2.84315	4.45619	-0.567341	-1.30828	0.241652	0.00381754	0.0352005	0.285529
Prosalpha5	trough	24	12	8	5.26316e-08	1	1.8859	-3.61939	5.50529	-0.521056	-1.44974	0.241493	0.00381754	0.0352005	0.285529
CG14302	trough	24	8	8	0.0163016	1.00951	1.79505	-2.32852	4.12357	-0.770896	-1.25773	0.242372	0.00381754	0.0352005	0.285529
Mip	trough	24	16	16	-0.181901	1.11707	2.21863	-3.27261	5.49124	-0.677939	-1.03249	0.241652	0.00381754	0.0352005	0.285529
Su(var)205	trough	24	20	8	1.75439e-08	1	1.7305	-2.16907	3.89957	-0.797808	-1.34757	0.241493	0.00381754	0.0352005	0.285529
CG9631	trough	24	4	8	0.142614	0.993783	1.95407	-2.85226	4.80633	-0.685095	-1.92402	0.241566	0.00381754	0.0352005	0.285529
lt	trough	24	20	8	-5.84328e-18	1	2.26445	-2.64531	4.90976	-0.856026	-1.00358	0.241493	0.00381754	0.0352005	0.285529
CG32647	trough	24	20	16	0.0356333	0.981951	2.31749	-2.0263	4.3438	-1.1437	-1.14755	0.242213	0.00381754	0.0352005	0.285529
CG8654	trough	24	8	8	-1.75439e-08	1	2.1116	-2.17895	4.29056	-0.969091	-1.1551	0.242372	0.00381754	0.0352005	0.285529
Syx6	trough	24	20	8	-3.50877e-08	1	1.9894	-2.05427	4.04368	-0.968421	-1.00535	0.240212	0.00398172	0.0367705	0.290668
wac	trough	24	4	8	0.0311029	0.966378	1.8352	-2.75888	4.59407	-0.665197	-1.37548	0.240281	0.00398172	0.0367705	0.290668
jim	trough	24	8	16	-3.50877e-08	1	2.17893	-1.99211	4.17103	-1.09378	-1.32205	0.24109	0.00398172	0.0367705	0.290668
imd	trough	24	4	16	-5.26316e-08	1	2.55633	-2.30571	4.86203	-1.1087	-1.4807	0.240281	0.00398172	0.0367705	0.290668
CG34318	trough	24	4	8	0.0283034	1.01188	1.93576	-2.90432	4.84008	-0.666512	-1.40703	0.240281	0.00398172	0.0367705	0.290668
CSN6	trough	24	0	16	-0.0629437	0.962626	2.91852	-2.34747	5.26599	-1.24326	-0.943518	0.240757	0.00398172	0.0367705	0.290668
blow	trough	24	4	8	-5.84328e-18	1	1.34034	-3.25163	4.59197	-0.412206	-1.6839	0.240281	0.00398172	0.0367705	0.290668
Lac	trough	24	8	16	8.77193e-08	1	2.09184	-1.9565	4.04834	-1.06918	-1.24378	0.24109	0.00398172	0.0367705	0.290668
CG15617	trough	24	0	8	0.0261578	0.928611	1.94159	-2.66609	4.60769	-0.728254	-1.39452	0.240757	0.00398172	0.0367705	0.290668
synaptogyrin	trough	24	4	8	-1.75439e-08	1	1.97203	-4.20561	6.17764	-0.468905	-1.71231	0.240281	0.00398172	0.0367705	0.290668
CG8617	trough	24	12	8	-5.26316e-08	1	2.27416	-2.33576	4.60993	-0.973627	-0.875974	0.240212	0.00398172	0.0367705	0.290668
Dgp-1	trough	24	16	8	3.50877e-08	1	3.09722	-2.24189	5.3391	-1.38152	-0.846644	0.24037	0.00398172	0.0367705	0.290668
pr-set7	trough	24	4	8	-0.116789	1.03229	1.90108	-2.90282	4.80389	-0.654907	-0.814208	0.240281	0.00398172	0.0367705	0.290668
CG10103	trough	24	8	16	-1.75439e-08	1	2.09529	-2.56595	4.66124	-0.816575	-1.06762	0.24109	0.00398172	0.0367705	0.290668
CG10264	trough	24	8	16	-0.0127773	0.939189	1.74322	-2.85099	4.59422	-0.611444	-1.32376	0.24109	0.00398172	0.0367705	0.290668
Cpr78Cb	trough	24	8	16	1.75439e-08	1	1.71436	-3.34897	5.06333	-0.511907	-2.1633	0.24109	0.00398172	0.0367705	0.290668
CG34450	trough	24	12	16	-0.0531254	0.994237	1.76272	-3.02581	4.78852	-0.582561	-1.18926	0.240212	0.00398172	0.0367705	0.290668
pll	trough	24	8	8	-0.0126495	0.995699	2.15892	-2.12424	4.28315	-1.01633	-0.746448	0.24109	0.00398172	0.0367705	0.290668
CG7987	trough	24	20	8	-0.0180655	1.00037	2.29888	-2.93268	5.23157	-0.783884	-1.26792	0.240212	0.00398172	0.0367705	0.290668
CG5599	trough	24	8	8	5.26316e-08	1	1.84783	-2.35189	4.19972	-0.785677	-1.10393	0.24109	0.00398172	0.0367705	0.290668
TepIV	trough	24	4	16	3.50877e-08	1	2.15409	-2.03187	4.18596	-1.06015	-1.03608	0.240281	0.00398172	0.0367705	0.290668
kat-60L1	trough	24	16	16	3.50877e-08	1	2.93625	-2.38855	5.3248	-1.2293	-0.845308	0.24037	0.00398172	0.0367705	0.290668
CG8801	trough	24	20	8	3.50877e-08	1	1.87181	-2.17543	4.04724	-0.860434	-1.09463	0.240212	0.00398172	0.0367705	0.290668
fs(1)Yb	trough	24	16	16	-0.0663	0.915211	1.13448	-2.93472	4.06921	-0.386573	-1.14822	0.24037	0.00398172	0.0367705	0.290668
CG6465	trough	24	20	8	0.0144493	0.998675	1.60176	-2.41042	4.01218	-0.664512	-1.40124	0.240212	0.00398172	0.0367705	0.290668
CG2201	trough	24	20	8	1.75439e-08	1	2.28671	-2.31413	4.60084	-0.988153	-0.970533	0.240212	0.00398172	0.0367705	0.290668
sec10	trough	24	20	8	-1.75439e-08	1	1.56033	-2.99642	4.55676	-0.520732	-1.52756	0.240212	0.00398172	0.0367705	0.290668
CG5867	trough	24	4	8	3.89552e-18	1	2.07678	-1.49798	3.57476	-1.38638	-1.01591	0.240281	0.00398172	0.0367705	0.290668
CG7337	trough	24	20	16	2.4347e-17	1	2.50296	-2.3346	4.83757	-1.07212	-1.20698	0.240932	0.00398172	0.0367705	0.290668
cer	trough	24	20	8	-0.0147208	0.997292	1.70247	-2.80653	4.509	-0.606609	-1.36348	0.240212	0.00398172	0.0367705	0.290668
mRpL35	trough	24	20	16	-1.75439e-08	1	1.96825	-3.08461	5.05286	-0.638086	-1.21567	0.23965	0.00415213	0.0381505	0.292152
CG4853	trough	24	8	16	-0.0123743	0.993669	1.66106	-2.78596	4.44703	-0.596227	-1.30299	0.239807	0.00415213	0.0381505	0.292152
CG1227	trough	24	16	8	0.0246095	0.991662	1.91807	-2.89044	4.80851	-0.663591	-1.52886	0.239088	0.00415213	0.0381505	0.292152
CG4330	trough	24	8	16	5.26316e-08	1	1.7251	-2.11534	3.84044	-0.815521	-1.21706	0.239807	0.00415213	0.0381505	0.292152
Mov34	trough	24	12	16	5.26316e-08	1	2.31221	-2.20357	4.51578	-1.0493	-1.13174	0.238931	0.00415213	0.0381505	0.292152
sec63	trough	24	4	16	0.0196828	0.991404	1.70007	-2.79281	4.49288	-0.60873	-1.27644	0.238996	0.00415213	0.0381505	0.292152
RhoGEF3	trough	24	20	16	9.7388e-18	1	1.77028	-2.94096	4.71124	-0.601941	-1.25581	0.23965	0.00415213	0.0381505	0.292152
ush	trough	24	16	8	0.0289468	0.986133	2.10107	-2.90291	5.00397	-0.72378	-1.70412	0.239088	0.00415213	0.0381505	0.292152
CG7920	trough	24	0	16	-5.26316e-08	1	2.12955	-3.2145	5.34404	-0.662482	-0.919286	0.23947	0.00415213	0.0381505	0.292152
CG5541	trough	24	8	8	5.84328e-18	1	1.80434	-3.03605	4.84039	-0.594307	-1.09207	0.239807	0.00415213	0.0381505	0.292152
CG9941	trough	24	4	8	-0.0568182	1.03915	1.43973	-3.89384	5.33357	-0.369745	-1.15266	0.238996	0.00415213	0.0381505	0.292152
CG2083	trough	24	0	8	-1.55821e-17	1	2.32422	-2.09352	4.41773	-1.1102	-1.43224	0.23947	0.00415213	0.0381505	0.292152
CG2617	trough	24	8	8	-3.50877e-08	1	2.83086	-2.00577	4.83663	-1.41136	-1.43643	0.239807	0.00415213	0.0381505	0.292152
Set2	trough	24	12	8	0.012222	0.9954	1.28701	-3.10526	4.39227	-0.414462	-2.47315	0.238931	0.00415213	0.0381505	0.292152
row	trough	24	16	8	-7.01754e-08	1	1.51688	-2.55752	4.0744	-0.593108	-1.33426	0.239088	0.00415213	0.0381505	0.292152
geminin	trough	24	0	16	0.0228162	0.978664	2.04508	-2.15226	4.19735	-0.950203	-1.29152	0.23947	0.00415213	0.0381505	0.292152
CG8774	trough	24	0	8	0.029013	0.961401	1.73714	-2.5804	4.31754	-0.673204	-1.34401	0.23947	0.00415213	0.0381505	0.292152
CG2209	trough	24	0	16	0.00844546	1.09735	2.45733	-2.95451	5.41184	-0.831719	-1.23836	0.23947	0.00415213	0.0381505	0.292152
CG5999	trough	24	4	16	-0.00596393	0.999591	1.45221	-2.89855	4.35076	-0.501013	-1.69257	0.238996	0.00415213	0.0381505	0.292152
CG8335	trough	24	12	8	0.152563	0.99322	2.31658	-2.17241	4.48898	-1.06636	-1.47111	0.238931	0.00415213	0.0381505	0.292152
Mlc1	trough	24	0	8	-1.75439e-08	1	2.0383	-3.44122	5.47953	-0.592319	-1.25056	0.23947	0.00415213	0.0381505	0.292152
Cpr5C	trough	24	16	8	5.26316e-08	1	2.92028	-1.667	4.58727	-1.75182	-0.893751	0.239088	0.00415213	0.0381505	0.292152
CG14777	trough	24	20	8	3.50877e-08	1	2.01099	-3.27611	5.2871	-0.613833	-1.04708	0.238931	0.00415213	0.0381505	0.292152
sced	trough	24	12	8	-0.00634949	0.983005	1.5485	-2.84746	4.39596	-0.543818	-1.17415	0.238931	0.00415213	0.0381505	0.292152
nrv1	trough	24	16	8	-1.75439e-08	1	2.64393	-2.03719	4.68112	-1.29783	-1.12204	0.239088	0.00415213	0.0381505	0.292152
Obp8a	trough	24	4	8	-0.0334986	1.00018	1.36832	-3.18037	4.54869	-0.43024	-1.03405	0.238996	0.00415213	0.0381505	0.292152
CG7852	trough	24	0	8	0.166293	1.02809	2.01187	-2.64789	4.65976	-0.7598	-2.96569	0.23947	0.00415213	0.0381505	0.292152
CG13776	trough	24	20	8	-0.052478	0.918855	1.59766	-2.32215	3.91981	-0.68801	-1.06708	0.238931	0.00415213	0.0381505	0.292152
CG10395	trough	24	16	8	-7.01754e-08	1	1.52283	-2.46415	3.98698	-0.617995	-1.00318	0.239088	0.00415213	0.0381505	0.292152
CG15922	trough	24	0	8	-9.7388e-18	1	2.34845	-2.05567	4.40412	-1.14242	-1.3441	0.23947	0.00415213	0.0381505	0.292152
ClC-b	trough	24	16	8	-8.77193e-08	1	2.06144	-2.08789	4.14933	-0.987331	-1.1299	0.239088	0.00415213	0.0381505	0.292152
CG3238	trough	24	16	8	-0.0209201	0.991827	1.91587	-2.16554	4.08141	-0.884705	-1.29528	0.239088	0.00415213	0.0381505	0.292152
Adh	trough	24	4	8	0.0298288	0.996838	2.68331	-2.02525	4.70856	-1.32492	-1.2399	0.238996	0.00415213	0.0381505	0.292152
CG12991	trough	24	20	16	1.75439e-08	1	2.60769	-2.17277	4.78047	-1.20017	-0.875411	0.23965	0.00415213	0.0381505	0.292152
CG12026	trough	24	20	8	0.0872993	0.966888	2.02135	-2.87939	4.90073	-0.702005	-1.98227	0.238931	0.00415213	0.0381505	0.292152
CG11658	trough	24	20	16	-0.000273116	0.976693	1.87374	-2.67741	4.55116	-0.699834	-0.915742	0.23965	0.00415213	0.0381505	0.292152
CG5390	trough	24	16	8	1.75439e-08	1	2.06096	-2.73201	4.79297	-0.754373	-1.15636	0.239088	0.00415213	0.0381505	0.292152
CG12112	trough	24	20	8	0.0974311	1.02711	1.86545	-3.66115	5.5266	-0.509524	-2.44775	0.238931	0.00415213	0.0381505	0.292152
blot	trough	24	16	8	-5.26316e-08	1	3.03658	-2.09664	5.13322	-1.44831	-1.00144	0.237806	0.00432897	0.0397105	0.299663
mira	trough	24	16	8	-0.0458648	1.03575	2.06936	-3.46407	5.53343	-0.59738	-1.16192	0.237806	0.00432897	0.0397105	0.299663
CG10621	trough	24	12	8	-1.75439e-08	1	1.91484	-2.66954	4.58438	-0.717292	-1.47912	0.23765	0.00432897	0.0397105	0.299663
pex12	trough	24	4	8	-0.0124235	0.99554	2.49262	-2.94612	5.43874	-0.84607	-1.26424	0.237711	0.00432897	0.0397105	0.299663
CG33255	trough	24	4	16	0.0339345	1.00469	2.13587	-2.11338	4.24925	-1.01064	-1.12559	0.237711	0.00432897	0.0397105	0.299663
CG31823	trough	24	12	16	0.0576984	1.05792	2.37424	-2.8965	5.27074	-0.819694	-2.22794	0.23765	0.00432897	0.0397105	0.299663
XNP	trough	24	12	8	1.75439e-08	1	2.15462	-2.30683	4.46145	-0.934013	-1.09852	0.23765	0.00432897	0.0397105	0.299663
ths	trough	24	8	16	-0.0405894	1.00512	1.73495	-2.85371	4.58866	-0.607964	-1.08813	0.238525	0.00432897	0.0397105	0.299663
CG3394	trough	24	4	16	0.0303627	0.995141	1.76977	-2.89836	4.66813	-0.610612	-1.93774	0.237711	0.00432897	0.0397105	0.299663
W	trough	24	12	16	0.0530037	1.03226	2.24838	-3.54227	5.79065	-0.634729	-1.9234	0.23765	0.00432897	0.0397105	0.299663
eIF5	trough	24	20	8	-3.50877e-08	1	2.3015	-1.78539	4.08689	-1.28908	-1.09195	0.23765	0.00432897	0.0397105	0.299663
CG5516	trough	24	8	16	-0.0887667	1.03977	1.58434	-3.10103	4.68537	-0.510908	-0.849465	0.238525	0.00432897	0.0397105	0.299663
abs	trough	24	16	8	-0.121296	1.03113	1.80224	-2.13471	3.93695	-0.844254	-0.967508	0.237806	0.00432897	0.0397105	0.299663
CG11192	trough	24	12	8	1.94776e-17	1	1.69031	-2.54413	4.23445	-0.664397	-1.14546	0.23765	0.00432897	0.0397105	0.299663
CG14786	trough	24	16	8	0.0624962	1.05168	2.76132	-3.34562	6.10694	-0.825352	-2.00765	0.237806	0.00432897	0.0397105	0.299663
Gyk	trough	24	20	16	-5.26316e-08	1	1.80616	-3.01395	4.82012	-0.599268	-1.08517	0.238369	0.00432897	0.0397105	0.299663
CG4957	trough	24	20	8	-5.26316e-08	1	2.58346	-2.13419	4.71765	-1.21051	-1.44315	0.23765	0.00432897	0.0397105	0.299663
Max	trough	24	16	16	-3.50877e-08	1	1.92425	-2.29062	4.21487	-0.840054	-1.06699	0.237806	0.00432897	0.0397105	0.299663
CG4065	trough	24	12	16	-5.26316e-08	1	1.79984	-2.87736	4.6772	-0.625516	-1.0511	0.236369	0.00451245	0.0408705	0.302052
Pp2C1	trough	24	0	8	0.0502916	0.983692	1.97691	-2.59909	4.576	-0.760613	-1.26705	0.236895	0.00451245	0.0408705	0.302052
CG4036	trough	24	4	16	0.0124664	0.99557	1.89451	-2.78572	4.68023	-0.680079	-1.05269	0.236426	0.00451245	0.0408705	0.302052
LanA	trough	24	8	16	-3.50877e-08	1	2.10631	-2.0692	4.17551	-1.01793	-1.05073	0.237243	0.00451245	0.0408705	0.302052
cold	trough	24	8	16	-9.7388e-18	1	1.81831	-2.26509	4.0834	-0.802757	-1.1314	0.237243	0.00451245	0.0408705	0.302052
ApepP	trough	24	20	8	1.75439e-08	1	2.03273	-2.59731	4.63004	-0.782629	-1.0535	0.236369	0.00451245	0.0408705	0.302052
CG10505	trough	24	12	16	-1.75439e-08	1	1.82101	-2.5875	4.4085	-0.703772	-1.25277	0.236369	0.00451245	0.0408705	0.302052
CG17293	trough	24	4	16	-7.01754e-08	1	1.78877	-3.44759	5.23636	-0.518848	-1.47657	0.236426	0.00451245	0.0408705	0.302052
Vha100-2	trough	24	20	8	1.75439e-08	1	2.71004	-2.94165	5.65169	-0.921268	-1.29786	0.236369	0.00451245	0.0408705	0.302052
CG5162	trough	24	12	16	-5.26316e-08	1	1.65404	-2.35055	4.00459	-0.70368	-0.925626	0.236369	0.00451245	0.0408705	0.302052
SNF1A	trough	24	4	16	1.75439e-08	1	3.09587	-1.99768	5.09355	-1.54973	-0.787657	0.236426	0.00451245	0.0408705	0.302052
deltaCOP	trough	24	8	8	0.0112315	0.994746	1.9141	-2.88875	4.80285	-0.662606	-4.53247	0.237243	0.00451245	0.0408705	0.302052
CG1572	trough	24	8	16	-5.26316e-08	1	1.79229	-3.32832	5.12062	-0.538497	-1.16172	0.237243	0.00451245	0.0408705	0.302052
CG5155	trough	24	20	8	-0.00029983	0.982558	2.07188	-3.89697	5.96886	-0.531665	-2.64782	0.236369	0.00451245	0.0408705	0.302052
CG15731	trough	24	16	16	-0.0563683	1.05676	1.8536	-2.47239	4.32599	-0.749717	-0.857011	0.236524	0.00451245	0.0408705	0.302052
Pros54	trough	24	8	16	8.77193e-08	1	2.12809	-2.34192	4.47001	-0.908694	-1.23802	0.237243	0.00451245	0.0408705	0.302052
Tsf1	trough	24	16	16	-3.89552e-18	1	2.26554	-2.00871	4.27425	-1.12786	-0.734255	0.236524	0.00451245	0.0408705	0.302052
nop5	trough	24	0	8	-0.00213783	0.987823	1.85526	-2.92643	4.78169	-0.633967	-1.66285	0.236895	0.00451245	0.0408705	0.302052
MED14	trough	24	8	16	-7.01754e-08	1	2.93676	-2.34653	5.28329	-1.25153	-1.38829	0.237243	0.00451245	0.0408705	0.302052
mtg	trough	24	0	8	-8.77193e-08	1	1.58964	-3.53851	5.12815	-0.44924	-1.44417	0.236895	0.00451245	0.0408705	0.302052
lbl	trough	24	0	16	-0.00400045	0.986451	1.80094	-2.89752	4.69846	-0.621545	-1.36004	0.236895	0.00451245	0.0408705	0.302052
l(2)37Cg	trough	24	0	16	9.7388e-19	1	1.95238	-2.384	4.33638	-0.818951	-0.952932	0.236895	0.00451245	0.0408705	0.302052
CG17002	trough	24	16	8	-1.75439e-08	1	2.24005	-2.78116	5.02121	-0.805439	-1.2159	0.236524	0.00451245	0.0408705	0.302052
yellow-b	trough	24	20	16	-7.79104e-18	1	1.89444	-1.96101	3.85545	-0.966051	-0.838538	0.237087	0.00451245	0.0408705	0.302052
CG8675	trough	24	20	8	0.0287489	0.926641	2.26558	-2.59372	4.8593	-0.873489	-0.977009	0.236369	0.00451245	0.0408705	0.302052
Cyp6t1	trough	24	16	8	0.0364056	0.981425	2.36324	-1.99449	4.35773	-1.18488	-1.24482	0.236524	0.00451245	0.0408705	0.302052
CG15043	trough	24	20	8	0.0741358	0.959212	1.78378	-2.47524	4.25902	-0.720648	-1.32121	0.235088	0.00470276	0.0424305	0.307481
CG15308	trough	24	8	8	-1.75439e-08	1	2.34746	-1.64071	3.98817	-1.43076	-1.02898	0.23596	0.00470276	0.0424305	0.307481
CG13678	trough	24	12	8	1.75439e-08	1	2.36294	-2.44505	4.80799	-0.966419	-1.06409	0.235088	0.00470276	0.0424305	0.307481
CG10151	trough	24	16	16	0.0543353	0.939222	1.96204	-3.19754	5.15959	-0.613609	-1.20443	0.235242	0.00470276	0.0424305	0.307481
CG13484	trough	24	4	16	-0.0258501	1.02981	2.28647	-3.40908	5.69555	-0.6707	-1.24696	0.235141	0.00470276	0.0424305	0.307481
Nplp3	trough	24	4	16	-5.26316e-08	1	2.0901	-2.29897	4.38907	-0.909145	-0.801145	0.235141	0.00470276	0.0424305	0.307481
SH3PX1	trough	24	8	16	1.16866e-17	1	2.15329	-2.86397	5.01726	-0.751854	-1.19965	0.23596	0.00470276	0.0424305	0.307481
CG4341	trough	24	8	16	3.50877e-08	1	2.81197	-2.71554	5.52751	-1.03551	-1.323	0.23596	0.00470276	0.0424305	0.307481
CG6234	trough	24	8	16	0.00316175	0.98314	2.30369	-2.79713	5.10082	-0.823589	-1.5829	0.23596	0.00470276	0.0424305	0.307481
CG7408	trough	24	8	16	0.0173846	0.99211	1.4857	-2.93514	4.42085	-0.506178	-1.30477	0.23596	0.00470276	0.0424305	0.307481
CG10435	trough	24	8	16	-3.50877e-08	1	1.88185	-2.03129	3.91314	-0.926428	-0.977833	0.23596	0.00470276	0.0424305	0.307481
CG8765	trough	24	12	16	7.01754e-08	1	2.47884	-2.72712	5.20596	-0.908961	-1.58114	0.235088	0.00470276	0.0424305	0.307481
nahoda	trough	24	16	8	-1.75439e-08	1	3.02957	-2.44192	5.47149	-1.24065	-0.977518	0.235242	0.00470276	0.0424305	0.307481
Rpt1	trough	24	8	16	-1.75439e-08	1	1.89899	-2.29407	4.19306	-0.82778	-0.999802	0.23596	0.00470276	0.0424305	0.307481
Nep2	trough	24	0	8	-3.50877e-08	1	1.95587	-2.31865	4.27452	-0.843536	-1.10573	0.235607	0.00470276	0.0424305	0.307481
CG30104	trough	24	20	8	0.0343816	0.963765	1.94476	-2.45678	4.40154	-0.791589	-2.87097	0.235088	0.00470276	0.0424305	0.307481
SIP3	trough	24	4	8	-0.0601687	0.983184	1.44818	-3.24757	4.69575	-0.445926	-0.906701	0.235141	0.00470276	0.0424305	0.307481
CG13127	trough	24	20	8	0.0157748	0.974858	1.92512	-2.68986	4.61497	-0.715695	-1.81084	0.235088	0.00470276	0.0424305	0.307481
CG15393	trough	24	4	8	-0.021239	1.00385	1.4416	-2.95729	4.39889	-0.487473	-1.40466	0.235141	0.00470276	0.0424305	0.307481
CG18371	trough	24	20	8	-0.010292	0.998825	2.15452	-2.21546	4.36998	-0.972495	-1.24606	0.235088	0.00470276	0.0424305	0.307481
CG16721	trough	24	20	8	3.50877e-08	1	1.51227	-1.95577	3.46804	-0.773234	-1.14747	0.235088	0.00470276	0.0424305	0.307481
Ank	trough	24	20	8	3.50877e-08	1	1.50989	-2.60397	4.11386	-0.579843	-0.947368	0.235088	0.00470276	0.0424305	0.307481
dia	trough	24	4	8	0	1	2.93438	-1.8703	4.80467	-1.56894	-1.15354	0.235141	0.00470276	0.0424305	0.307481
CG9715	trough	24	20	8	-5.26316e-08	1	1.91384	-3.23136	5.14521	-0.592271	-1.27262	0.235088	0.00470276	0.0424305	0.307481
Adk2	trough	24	4	16	7.42583e-18	1	1.8022	-2.38475	4.18695	-0.755717	-1.43314	0.235141	0.00470276	0.0424305	0.307481
Fhos	trough	24	20	8	1.55821e-17	1	2.1151	-1.98016	4.09527	-1.06815	-1.10532	0.233807	0.00490013	0.0440105	0.314283
DAT	trough	24	0	8	-0.00902769	0.973455	1.92434	-3.65837	5.58271	-0.526009	-1.2729	0.23432	0.00490013	0.0440105	0.314283
[truncated: 8,025 more rows]

## Sheet: per24_phby4_a12_BH_len29
ID	Waveform	Period	Phase	Width	Mean	Std_Dev	Max	Min	Max_Amp	FC	IQR_FC	Tau	initP	P	BH1
[truncated: 9,312 more rows]

## Sheet: per24_phby4_aby4_BH_len29
ID	Waveform	Period	Phase	Width	Mean	Std_Dev	Max	Min	Max_Amp	FC	IQR_FC	Tau	initP	P	BH1
[truncated: 9,312 more rows]

[truncated: 2 more sheets: DAVID_per24_phby4_a12_BH_len29, DAVID_per24_phby4_aby4_BH_len29]
